# Supplementary material for: SARS-CoV-2 RNAs are processed into 22-nt vsRNAs in Vero cells
Source: Frontiers journal article supplement (doi:10.3389/fimmu.2022.1008084), 2022-10-28
Supplement: Data_Sheet_1.zip [file SARS-CoV-2 source data.xlsx]

## Sheet: Figure 1B
Figure 1B. Fractions of small RNAs in control and virus-infected (6 hpi/12 hpi) Vero cells.
Sample	Total Reads	Clean reads	Matched to human genome	Clean reads matched to human genome (without rRNA & tRNA)	22-23nt sRNA (without rRNA & tRNA)	Count							Proportion
						miRNA	rRNA	tRNA	piRNA	vsRNA	Unannotated	Others	miRNA	rRNA	tRNA	piRNA	vsRNA	Unannotated	Others	22-23nt sRNA/matched to human genome (without rRNA & tRNA)
Vero-Control-6h (combined)	47779229	45916427	39910561	34417734	21686457	30887440	4794783	698044	7528	14	8114355	1414263	0.672688	0.104424	0.0152025	0.00016395	3.04902e-07	0.17672	0.0308008	0.630095
Vero-Control-12h (combined)	42862097	41833740	35173210	32296816	20284758	28022962	2416527	459867	6937	8	9811382	1116057	0.669865	0.057765	0.0109927	0.000165823	1.91233e-07	0.234533	0.0266784	0.628073
Vero-SARS-CoV-2-6h (combined)	43798441	42281855	35683116	31825079	19148114	27142412	2991212	866825	7639	118711	9439702	1715354	0.64194	0.0707446	0.0205011	0.000180669	0.00280761	0.223257	0.0405695	0.601667
Vero-SARS-CoV-2-12h (combined)	58042499	56259099	46256335	41325315	24277298	33706110	3363953	1567067	11831	1103474	14447309	2059355	0.599123	0.0597939	0.0278545	0.000210295	0.0196141	0.2568	0.0366048	0.587468

## Sheet: Figure 2B and 2C
Figure 2B and 2C. Summary of host DE miRNAs upon SARS-CoV-2 infection at 6 hpi and 12 hpi.
		Raw counts at 6 hpi				CPM (per million counts) at 6 hpi				DE analyses at 6 hpi			Raw counts at 12 hpi				CPM (per million counts) at 12 hpi				DE analyses at 12 hpi
	name	Vero-Control-6h-1	Vero-Control-6h-2	Vero- SARS-CoV-2-6h-1	Vero- SARS-CoV-2-6h-2	Vero-Control-6h-1	Vero-Control-6h-2	Vero- SARS-CoV-2-6h-1	Vero- SARS-CoV-2-6h-2	Log2FoldChange	Adjust P	Change	Vero-Control-12h-1	Vero-Control-12h-2	Vero-SARS-CoV-2-12h-1	Vero-SARS-CoV-2-12h-2	Vero-Control-12h-1	Vero-Control-12h-2	Vero-SARS-CoV-2-12h-1	Vero-SARS-CoV-2-12h-2	Log2FoldChange	Adjust P	Change
Up-regulated miRNA	hsa-miR-103a-3p	105992	170961	159962	193771	6397.01	9578.32	11275.6	10985.7	0.4	1	Stable	131748	126561	241341	351469	7836.88	8172.85	13799.6	14745.1	0.663687	4.19e-37	Up
	hsa-miR-106a-5p	68279	78380	89592	91288	4120.89	4391.34	6315.27	5175.49	0.34	1	Stable	54776	50139	108735	157615	3258.29	3237.79	6217.32	6612.4	0.811581	2.83e-67	Up
	hsa-miR-107	43492	70156	67978	82463	2624.9	3930.58	4791.71	4675.17	0.45	1	Stable	54027	51752	102472	148515	3213.74	3341.96	5859.21	6230.63	0.712469	4.94e-43	Up
	hsa-miR-1185-5p	705	318	482	472	42.55	17.82	33.98	26.76	-0.1	1	Stable	284	238	1024	1194	16.89	15.37	58.55	50.09	1.58102	2.49e-18	Up
	hsa-miR-143-3p	413	887	416	2041	24.93	49.7	29.32	115.71	0.89	1	Stable	221	222	480	613	13.15	14.34	27.45	25.72	0.781647	0.000695781	Up
	hsa-miR-154-3p	3009	1397	1707	1639	181.6	78.27	120.33	92.92	-0.4	1	Stable	1096	1041	2199	2708	65.19	67.22	125.74	113.61	0.683632	6.81e-09	Up
	hsa-miR-155-3p	89	47	109	117	5.37	2.63	7.68	6.63	0.73	1	Stable	55	57	269	376	3.27	3.68	15.38	15.77	1.99476	1.1e-09	Up
	hsa-miR-17-5p	94344	110922	120467	118005	5694.01	6214.55	8491.62	6690.19	0.26	1	Stable	77128	70710	140598	205206	4587.87	4566.2	8039.21	8608.98	0.692558	2.48e-47	Up
	hsa-miR-181b-2-3p	289	303	346	498	17.44	16.98	24.39	28.23	0.52	1	Stable	401	302	726	933	23.85	19.5	41.51	39.14	0.725092	0.000230176	Up
	hsa-miR-181b-3p	394	465	562	708	23.78	26.05	39.61	40.14	0.59	1	Stable	600	492	1021	1375	35.69	31.77	58.38	57.69	0.612549	7.13e-05	Up
	hsa-miR-18a-5p	7177	3328	6230	3719	433.16	186.46	439.15	210.85	-0.05	1	Stable	2883	2611	4844	7116	171.49	168.61	276.97	298.54	0.589012	3.28e-14	Up
	hsa-miR-20a-5p	106482	119114	145438	144763	6426.59	6673.52	10251.8	8207.21	0.4	1	Stable	96944	86093	181292	275146	5766.61	5559.57	10366	11543.2	0.781499	3.91e-44	Up
	hsa-miR-21-3p	13754	20356	13764	10842	830.11	1140.47	970.21	614.68	-0.4	1	Stable	10259	9010	16632	25480	610.25	581.83	951	1068.96	0.590684	1.85e-18	Up
	hsa-miR-23a-5p	65	114	94	107	3.92	6.39	6.63	6.07	0.22	1	Stable	26	30	226	276	1.55	1.94	12.92	11.58	2.64589	5.95e-11	Up
	hsa-miR-27a-5p	2573	5749	4444	5305	155.29	322.1	313.25	300.76	0.29	1	Stable	2924	2527	18694	26213	173.93	163.18	1068.9	1099.71	2.51536	0	Up
	hsa-miR-296-5p	199	458	201	397	12.01	25.66	14.17	22.51	-0.11	1	Stable	146	132	273	354	8.68	8.52	15.61	14.85	0.653368	0.0372957	Up
	hsa-miR-30b-3p	405	360	263	444	24.44	20.17	18.54	25.17	-0.12	1	Stable	304	237	513	702	18.08	15.3	29.33	29.45	0.64585	0.00368086	Up
	hsa-miR-34b-5p	357	241	378	245	21.55	13.5	26.64	13.89	0.1	1	Stable	275	274	523	777	16.36	17.69	29.9	32.6	0.706717	0.000814251	Up
	hsa-miR-3613-5p	1539	737	1538	2364	92.88	41.29	108.41	134.02	0.74	1	Stable	1231	1013	3142	4148	73.22	65.42	179.66	174.02	1.18092	6.5e-32	Up
	hsa-miR-424-5p	1053	581	751	853	63.55	32.55	52.94	48.36	-0.03	1	Stable	709	650	1244	1759	42.17	41.97	71.13	73.8	0.614437	4.18e-06	Up
	hsa-miR-4443	16	48	14	255	0.97	2.69	0.99	14.46	2.02	1	Stable	59	14	215	312	3.51	0.9	12.29	13.09	2.35164	1.76e-05	Up
	hsa-miR-874-3p	52	194	86	105	3.14	10.87	6.06	5.95	-0.29	1	Stable	63	66	247	351	3.75	4.26	14.12	14.73	1.67955	4.19e-07	Up
Down-regulated miRNA	hsa-miR-486-5p	1536	572	140	195	92.7	32.05	9.87	11.06	-2.69	0.002	Down	273	3380	212	202	16.24	218.27	12.12	8.47	-3.68707	0.0435836	Down
	hsa-miR-451a	788	559	145	67	47.56	31.32	10.22	3.8	-2.6	0.002	Down	210	3136	252	116	12.49	202.51	14.41	4.87	-3.65428	0.0815229	Stable
	hsa-miR-142-5p	36	20	12	19	2.17	1.12	0.85	1.08	-0.88	1	Stable	22	125	18	23	1.31	8.07	1.03	0.96	-2.4108	0.00823201	Down
	hsa-miR-663b	72	166	182	75	4.35	9.3	12.83	4.25	0.24	1	Stable	63	112	30	31	3.75	7.23	1.72	1.3	-2.04171	0.000746242	Down
	hsa-miR-206	544	563	221	191	32.83	31.54	15.58	10.83	-1.38	0.588	Stable	175	333	132	168	10.41	21.5	7.55	7.05	-1.30164	0.00140537	Down
	hsa-miR-122-5p	33	525	21	18	1.99	29.41	1.48	1.02	-3.71	0.005	Down	19	11	3	22	1.13	0.71	0.17	0.92	-0.904271	NA	NA
	hsa-miR-6529-3p	206	263	193	411	12.43	14.73	13.6	23.3	0.36	1	Stable	433	313	285	330	25.76	20.21	16.3	13.84	-0.780292	0.00250296	Down
	hsa-miR-128-3p	22996	41309	26064	52367	1387.89	2314.39	1837.23	2968.9	0.3	1	Stable	49757	38915	34225	44102	2959.74	2512.99	1956.94	1850.21	-0.692427	3.94e-20	Down
	hsa-miR-151b	2275	1298	1516	1052	137.3	72.72	106.86	59.64	-0.45	1	Stable	1290	1063	926	1286	76.73	68.64	52.95	53.95	-0.613411	2.93e-06	Down
	hsa-miR-1248	116	72	18	11	7	4.03	1.27	0.62	-2.66	0.046	Down	3	17	9	26	0.18	1.1	0.51	1.09	0.163597	NA	Stable

## Sheet: Figure 3A
Figure 3A. GO enrichment of target genes of host DE miRNAs (molecular function).
ID	Description	GeneRatio	BgRatio	P value	Adjusted P	Q value	Count	Genes
GO:0004674	protein serine/threonine kinase activity	71/1302	430/18337	1.77679e-11	1.65242e-08	1.32979e-08	71	MAP3K2/SNRK/TLK1/STK17B/CDK14/RPS6KA3/RPS6KA5/MASTL/TGFBR2/PPM1D/SGK1/ACVR2A/CDK17/CDK19/AKT3/BMPR2/LATS2/MAP2K1/PRKX/MAP3K9/ACVR2B/MINK1/PRKCE/DYRK1B/MYLK/MKNK1/DYRK2/CHEK1/MAPK4/TGFBR3/PRKG1/PRKD1/MAP4K3/MAP3K1/STK4/CASK/NEK2/PLK2/PRKACB/WNK1/MAP3K7/PDIK1L/CSNK1A1/BRD2/CDK6/STK35/STK38L/CDK8/STK24/TGFBR1/HIPK1/RPS6KB1/NUAK2/MAPK6/HIPK2/ATM/PRPF4B/MARK1/CDC42BPB/DYRK1A/CSNK1G3/SMG1/SIK3/UHMK1/BM…
GO:0001216	DNA-binding transcription activator activity	69/1302	447/18337	7.11251e-10	3.30732e-07	2.66158e-07	69	STAT3/E2F5/ESR1/E2F1/MYB/BCL11B/PLAG1/HIF1A/DMTF1/NFIA/NR4A2/ETV1/CLOCK/IRF2/E2F3/ISL1/NR4A3/SMAD2/ONECUT2/SP1/NR3C1/MYBL1/SATB2/PLAGL1/HSF2/ETV6/NFAT5/PAX9/HOXA9/SIX4/MEF2D/RUNX1/MEOX2/NFE2L2/HOXA13/MTF1/NEUROD6/SOX11/SRF/MECOM/RFXAP/NR2C2/ETS1/FOXO1/LMX1A/ATF2/CREBRF/ZFP62/NR1H2/FOSL2/FOXH1/SIX3/ESRRG/MEIS2/PLAGL2/GRHL2/KLF5/MAF/TCF12/HOXD8/MYF5/EPAS1/FOXO3/SOX12/TCF21/KLF10/SREBF1/MYCN/NFATC1
GO:0046332	SMAD binding	23/1302	77/18337	1.8449e-09	5.71918e-07	4.60254e-07	23	AXIN2/ZBTB7A/TGFBR2/SMAD7/PURA/FERMT2/SMAD2/PPM1A/USP15/DDX5/TGFBR3/SMURF2/PURB/HMGA2/RNF111/TGFBR1/HIPK2/MAGI2/FOXH1/TOB1/COL5A2/TCF12/BMPR1A
GO:0001228	DNA-binding transcription activator activity, RNA polymerase II-specific	67/1302	443/18337	2.97404e-09	6.91465e-07	5.56459e-07	67	STAT3/ESR1/MYB/BCL11B/PLAG1/HIF1A/DMTF1/NFIA/NR4A2/ETV1/CLOCK/IRF2/E2F3/ISL1/NR4A3/SMAD2/ONECUT2/SP1/NR3C1/MYBL1/SATB2/PLAGL1/HSF2/ETV6/NFAT5/PAX9/HOXA9/SIX4/MEF2D/RUNX1/MEOX2/NFE2L2/HOXA13/MTF1/NEUROD6/SOX11/SRF/MECOM/RFXAP/NR2C2/ETS1/FOXO1/LMX1A/ATF2/CREBRF/ZFP62/NR1H2/FOSL2/FOXH1/SIX3/ESRRG/MEIS2/PLAGL2/GRHL2/KLF5/MAF/TCF12/HOXD8/MYF5/EPAS1/FOXO3/SOX12/TCF21/KLF10/SREBF1/MYCN/NFATC1
GO:0004842	ubiquitin-protein transferase activity	62/1302	429/18337	6.45867e-08	1.20131e-05	9.66761e-06	62	FBXL5/RNF217/FBXO21/BTRC/MKRN1/TRIM2/RNF38/ANKIB1/RNF128/NEDD4L/UBE2Q1/UBE2E2/RBBP6/UBE4B/PELI2/ZNRF2/UBE2N/RNF138/UBE2W/ARIH1/SIAH1/MIB1/CUL2/UBR3/AREL1/NEDD4/RNF145/TNFAIP1/HECTD2/TRIM36/KLHL20/CDC42/CUL4A/UBR5/FBXO10/RNF144A/UBR1/UBE2H/HERC2/SH3RF1/RNF125/UBE2E3/KCMF1/SMURF2/TNFAIP3/UBE2D1/WWP1/CBL/RNF111/UBE2Z/UBE2E1/RNF182/MED1/UBE4A/FBXL3/HACE1/RMND5A/MARCHF6/MEX3C/FBXO30/NEURL1/RNF11
GO:0019787	ubiquitin-like protein transferase activity	64/1302	452/18337	8.58952e-08	1.33138e-05	1.07143e-05	64	FBXL5/RNF217/FBXO21/BTRC/MKRN1/TRIM2/RNF38/ANKIB1/RNF128/NEDD4L/UBE2Q1/UBE2E2/RBBP6/UBE4B/PELI2/ATG16L1/ZNRF2/UBE2N/RNF138/UBE2W/ARIH1/SIAH1/MIB1/CUL2/UBR3/AREL1/NEDD4/RNF145/TNFAIP1/HECTD2/TRIM36/KLHL20/CDC42/CUL4A/UBR5/FBXO10/RNF144A/UBR1/UBE2H/HERC2/SH3RF1/RNF125/UBE2E3/KCMF1/HDAC4/SMURF2/TNFAIP3/UBE2D1/WWP1/CBL/RNF111/UBE2Z/UBE2E1/RNF182/MED1/UBE4A/FBXL3/HACE1/RMND5A/MARCHF6/MEX3C/FBXO30/NEUR…
GO:0140297	DNA-binding transcription factor binding	56/1302	376/18337	1.00743e-07	1.33844e-05	1.07712e-05	56	STAT3/ZBTB7A/ESR1/HIF1A/RBL2/SETD3/DLL1/NR4A2/ISL1/NR4A3/SMAD2/ZFPM2/SP1/FOXP1/DDX5/EIF4E/YWHAH/GATA6/FOXP2/TLE4/RBBP8/NCOA1/RARB/LCOR/MEF2D/ANXA4/HMGA1/TMF1/HDAC4/TCF7L2/MED13/SIRT1/RERE/NFE2L2/HIF1AN/ARNT/GTF2A2/SMARCB1/MED1/SRF/MED14/HIPK2/CBX5/ATF2/NR1H2/LDB2/TEAD3/FOXH1/ACTN4/RERG/KLF5/TCF12/TCF21/STRN/BAZ2A/NFATC1
GO:0061629	RNA polymerase II-specific DNA-binding transcription factor binding	44/1302	271/18337	2.06044e-07	2.39526e-05	1.9276e-05	44	STAT3/ZBTB7A/ESR1/HIF1A/RBL2/SETD3/DLL1/NR4A2/ISL1/NR4A3/SP1/FOXP1/DDX5/YWHAH/GATA6/FOXP2/RBBP8/NCOA1/RARB/LCOR/ANXA4/HMGA1/TMF1/TCF7L2/MED13/SIRT1/NFE2L2/HIF1AN/ARNT/GTF2A2/SMARCB1/MED1/SRF/MED14/HIPK2/ATF2/NR1H2/LDB2/FOXH1/ACTN4/RERG/TCF21/STRN/BAZ2A
GO:0003712	transcription coregulator activity	63/1302	480/18337	1.59146e-06	0.000154092	0.000124006	63	MED26/EZH1/FGF2/BTG2/MED12L/RYBP/HNRNPU/SS18/CCND1/SETD3/TSG101/RUNX1T1/DYRK1B/NPAT/CNOT7/RAP2C/ZFPM2/PHB/TRIM8/KDM7A/TLE4/RBBP8/PAWR/RCOR3/PHF2/NCOA1/CCAR1/BCLAF3/LCOR/CBFB/BTAF1/HMGA1/TMF1/HDAC4/SMARCA2/MED13/CITED2/SIRT1/RERE/HMGA2/AKIRIN1/KDM2A/SMARCB1/RCOR1/KDM5B/MED1/HCFC2/SMARCC1/MED14/HIPK2/DYRK1A/MRTFB/KAT6A/LDB2/ACTN4/NOTCH1/TOB1/SMARCC2/DR1/NRG1/ENY2/KAT7/RSF1
GO:0035257	nuclear hormone receptor binding	27/1302	140/18337	1.657e-06	0.000154092	0.000124006	27	ZBTB7A/ESR1/HIF1A/NR4A2/ISL1/NR4A3/FOXP1/DDX5/YWHAH/FOXP2/NCOA1/RARB/LCOR/HMGA1/TMF1/TCF7L2/MED13/SIRT1/MED1/MED14/NR1H2/FOXH1/ACTN4/RERG/TCF21/STRN/BAZ2A
GO:0004879	nuclear receptor activity	15/1302	52/18337	1.98829e-06	0.000154092	0.000124006	15	STAT3/ESR1/RORA/NR4A2/NR4A3/NR3C1/RARB/ARNT/NR2C2/THRB/NR1H2/ESRRG/AHR/NR2C1/SREBF1
GO:0098531	ligand-activated transcription factor activity	15/1302	52/18337	1.98829e-06	0.000154092	0.000124006	15	STAT3/ESR1/RORA/NR4A2/NR4A3/NR3C1/RARB/ARNT/NR2C2/THRB/NR1H2/ESRRG/AHR/NR2C1/SREBF1
GO:0005160	transforming growth factor beta receptor binding	10/1302	24/18337	2.4555e-06	0.000175663	0.000141365	10	TGFBR2/RASL11B/SMAD7/FERMT2/BAMBI/SMAD2/USP15/TGFBR3/SMURF2/TGFBR1
GO:0016922	nuclear receptor binding	21/1302	97/18337	3.47623e-06	0.000230921	0.000185835	21	ZBTB7A/ESR1/NR4A2/ISL1/NR4A3/FOXP1/DDX5/YWHAH/FOXP2/NCOA1/RARB/LCOR/HMGA1/TMF1/MED1/NR1H2/FOXH1/RERG/TCF21/STRN/BAZ2A
GO:0045296	cadherin binding	47/1302	332/18337	4.42609e-06	0.000274418	0.000220839	47	PFKP/TAGLN2/RAB10/TWF1/FNBP1L/BMPR2/CNN3/CEMIP2/FASN/VAPB/LIMA1/SNX2/GIGYF2/EIF5/PCMT1/SEPTIN2/CALD1/YWHAB/YWHAZ/KTN1/ALDOA/MYH9/LYPLA2/ITGA6/COBLL1/PICALM/ANXA2/CBL/LASP1/STK24/CD2AP/CLIC1/PTPRB/ATXN2L/HNRNPK/MRTFB/KIF5B/KLC2/MACF1/USP8/ZC3HAV1/SPTBN1/ZC3H15/CTNND1/PTPN11/CTNND2/DDX6
GO:0051427	hormone receptor binding	29/1302	173/18337	1.26324e-05	0.00071287	0.000573685	29	ZBTB7A/ESR1/HIF1A/PTHLH/NR4A2/ISL1/NR4A3/FOXP1/DDX5/YWHAH/FOXP2/NCOA1/RARB/LCOR/HMGA1/TMF1/TCF7L2/MED13/SIRT1/MED1/MED14/NR1H2/FOXH1/ACTN4/RERG/TCF21/STRN/BAZ2A/PTPN11
GO:0106311	protein threonine kinase activity	37/1302	248/18337	1.38653e-05	0.00071287	0.000573685	37	SNRK/TLK1/STK17B/RPS6KA3/RPS6KA5/MASTL/SGK1/AKT3/LATS2/PRKX/MINK1/MKNK1/CHEK1/MAP4K3/STK4/CASK/NEK2/WNK1/PDIK1L/CSNK1A1/STK35/STK38L/STK24/HIPK1/RPS6KB1/NUAK2/HIPK2/ATM/PRPF4B/MARK1/CDC42BPB/CSNK1G3/SMG1/SIK3/UHMK1/CIT/EIF2AK3
GO:0019207	kinase regulator activity	34/1302	220/18337	1.43806e-05	0.00071287	0.000573685	34	LRP6/CCND2/CCND1/CCNT2/MAP2K1/GSKIP/SPRED1/SOCS6/CDKN1A/CAB39/CCNJL/CCNG2/YWHAB/SOCS5/CAMK2N1/TRIB2/STK4/GREM1/WNK1/AKAP11/CCNG1/PIK3R1/MOB1B/RICTOR/SPRY2/EPO/ALS2/CALM3/CALM1/SOCS1/NRG1/CCNYL1/SPRED2/CIT
GO:0106310	protein serine kinase activity	37/1302	249/18337	1.51953e-05	0.00071287	0.000573685	37	SNRK/TLK1/STK17B/RPS6KA3/RPS6KA5/MASTL/SGK1/AKT3/LATS2/PRKX/MINK1/MKNK1/CHEK1/MAP4K3/STK4/CASK/NEK2/WNK1/PDIK1L/CSNK1A1/STK35/STK38L/STK24/HIPK1/RPS6KB1/NUAK2/HIPK2/ATM/PRPF4B/MARK1/CDC42BPB/CSNK1G3/SMG1/SIK3/UHMK1/CIT/EIF2AK3
GO:0019003	GDP binding	17/1302	75/18337	1.53305e-05	0.00071287	0.000573685	17	RAB22A/RRAGD/ARL3/KRAS/RAB10/RAB5B/RAP1B/GNAI3/RAP2C/RAB5C/RAB5A/RAP1A/RIT2/MIEF1/DIRAS2/RERG/RAB9A
GO:0035258	steroid hormone receptor binding	17/1302	77/18337	2.2137e-05	0.000980353	0.000788943	17	ZBTB7A/ESR1/NR4A2/ISL1/NR4A3/FOXP1/DDX5/YWHAH/FOXP2/NCOA1/LCOR/TMF1/MED1/FOXH1/RERG/TCF21/STRN
GO:0008013	beta-catenin binding	18/1302	85/18337	2.34361e-05	0.000990709	0.000797277	18	AXIN2/BTRC/ESR1/GJA1/MED12L/RORA/SMAD7/NR4A2/AMER1/SALL1/GLI3/TCF7L2/DLG5/CD2AP/ASH2L/FOXO1/FOXO3/CTNND2
GO:0051020	GTPase binding	33/1302	222/18337	4.26925e-05	0.00172626	0.00138922	33	RRAGD/FGD4/CORO1C/FNBP1L/ATG16L1/RIC1/AP1G1/ANKFY1/TBC1D20/TRIOBP/DOCK4/DENND10/RABGAP1/PEX5L/TNFAIP1/SH3BP4/RAP1A/IARS1/NGFR/RASA1/PICALM/USP33/STRN3/RIMS1/KIF3B/HACE1/ALS2/CYRIB/DENND1B/SPTBN1/AKAP13/EVI5/CCDC186
GO:0061630	ubiquitin protein ligase activity	40/1302	294/18337	5.55912e-05	0.00215416	0.00173357	40	RNF217/BTRC/MKRN1/TRIM2/RNF38/ANKIB1/RNF128/NEDD4L/RBBP6/UBE4B/PELI2/ZNRF2/RNF138/ARIH1/SIAH1/UBR3/AREL1/NEDD4/RNF145/CDC42/UBR5/RNF144A/UBR1/HERC2/SH3RF1/RNF125/KCMF1/SMURF2/UBE2D1/WWP1/CBL/RNF111/MED1/UBE4A/HACE1/MARCHF6/MEX3C/FBXO30/NEURL1/RNF11
GO:0031624	ubiquitin conjugating enzyme binding	10/1302	33/18337	6.42545e-05	0.00239027	0.00192358	10	RNF217/DCUN1D4/ANKIB1/DCUN1D3/ARIH1/SIAH1/ZMYM2/RNF144A/RNF125/MARCHF6
GO:0001221	transcription coregulator binding	14/1302	61/18337	7.36171e-05	0.00262357	0.00211133	14	ZBTB7A/ESR1/RORA/CCNT2/LCOR/CHD6/NFE2L2/FOXO1/THRB/SIX3/EHMT1/AHR/CIT/NFATC1
GO:0003713	transcription coactivator activity	36/1302	258/18337	7.61681e-05	0.00262357	0.00211133	36	MED26/FGF2/MED12L/SS18/SETD3/TSG101/DYRK1B/NPAT/RAP2C/ZFPM2/TRIM8/PHF2/NCOA1/CCAR1/CBFB/HMGA1/TMF1/SMARCA2/MED13/CITED2/SIRT1/RERE/SMARCB1/MED1/HCFC2/SMARCC1/MED14/HIPK2/DYRK1A/MRTFB/KAT6A/ACTN4/NOTCH1/SMARCC2/DR1/ENY2
GO:0003714	transcription corepressor activity	28/1302	182/18337	8.61572e-05	0.00286165	0.00230292	28	EZH1/BTG2/RYBP/HNRNPU/CCND1/TSG101/RUNX1T1/NPAT/CNOT7/ZFPM2/PHB/TLE4/RBBP8/PAWR/RCOR3/CCAR1/LCOR/HDAC4/CITED2/SIRT1/RERE/HMGA2/RCOR1/KDM5B/MED1/HIPK2/TOB1/DR1
GO:0042393	histone binding	34/1302	241/18337	9.57069e-05	0.00306922	0.00246997	34	PHF19/EZH1/USP3/ATAD2/CHD1/WDTC1/PHC3/PHF6/CHD2/USP15/KDM7A/KMT2E/PHF2/FMR1/SPTY2D1/SMARCA2/BRD2/SIRT1/PSME4/KDM5B/KMT2A/MBTD1/ANP32B/SMARCC1/HAT1/CBX5/KAT6A/PHC2/MLLT3/BRPF1/SMARCC2/KAT7/BAZ2A/RSF1
GO:0031490	chromatin DNA binding	19/1302	103/18337	0.000104047	0.00322545	0.00259569	19	STAT3/HNRNPU/H3-3B/CLOCK/H3-5/HMGN1/HMGA2/SMARCB1/MED1/SRF/SMARCC1/THRB/ACTN4/NOTCH1/SMARCC2/ZFX/GRHL2/GATAD2B/FOXO3
GO:0061659	ubiquitin-like protein ligase activity	40/1302	305/18337	0.000125285	0.00375855	0.00302471	40	RNF217/BTRC/MKRN1/TRIM2/RNF38/ANKIB1/RNF128/NEDD4L/RBBP6/UBE4B/PELI2/ZNRF2/RNF138/ARIH1/SIAH1/UBR3/AREL1/NEDD4/RNF145/CDC42/UBR5/RNF144A/UBR1/HERC2/SH3RF1/RNF125/KCMF1/SMURF2/UBE2D1/WWP1/CBL/RNF111/MED1/UBE4A/HACE1/MARCHF6/MEX3C/FBXO30/NEURL1/RNF11
GO:0004115	3',5'-cyclic-AMP phosphodiesterase activity	6/1302	13/18337	0.000140699	0.00408907	0.00329069	6	PDE4D/PDE7A/PDE3B/PDE7B/PDE3A/PDE8B
GO:0004721	phosphoprotein phosphatase activity	27/1302	179/18337	0.0001601	0.00451192	0.00363099	27	PTPN3/PTPN4/PPM1D/EYA1/PPP3R1/PPP6C/PTPRR/PTPDC1/PPM1A/CTDNEP1/PPP1CC/RNGTT/MTMR4/PTEN/MINPP1/PTPRG/CTDSP2/EYA4/PTPRB/CTDSPL/DUSP4/PTPN12/PPM1E/PTP4A1/PTPN11/SSH2/CTDSPL2
GO:0019887	protein kinase regulator activity	28/1302	190/18337	0.000182853	0.00489618	0.00394022	28	CCND2/CCND1/CCNT2/MAP2K1/GSKIP/SPRED1/CDKN1A/CAB39/CCNJL/CCNG2/YWHAB/CAMK2N1/TRIB2/STK4/GREM1/WNK1/CCNG1/RICTOR/SPRY2/EPO/ALS2/CALM3/CALM1/SOCS1/NRG1/CCNYL1/SPRED2/CIT
GO:1901981	phosphatidylinositol phosphate binding	26/1302	171/18337	0.000184265	0.00489618	0.00394022	26	PLEKHA3/FCHO2/PFN2/ZFYVE26/KCNJ2/TWF1/FERMT2/WIPI2/ANKFY1/AMER1/ARAP2/SDCBP/SNX3/FCHSD2/SYT1/PICALM/ATG2B/ANXA2/OGT/TTPA/ARFIP1/MARK1/TTPAL/PLEKHB2/SH3PXD2A/DENND1B
GO:0004675	transmembrane receptor protein serine/threonine kinase activity	7/1302	19/18337	0.000210957	0.00544971	0.00438568	7	TGFBR2/ACVR2A/BMPR2/ACVR2B/TGFBR3/TGFBR1/BMPR1A
GO:0042578	phosphoric ester hydrolase activity	45/1302	367/18337	0.000235894	0.00592923	0.00477157	45	PDE4D/PTPN3/PTPN4/PPM1D/EYA1/PIP4P1/PIP4P2/PPP3R1/GPCPD1/PPP6C/PTPRR/PXYLP1/SYNJ1/PTPDC1/PPM1A/CTDNEP1/PDE7A/PDE3B/PPP1CC/PDE7B/RNGTT/MTMR4/PDE3A/PTEN/MINPP1/PTPRG/PDE8B/PDE10A/CTDSP2/EYA4/MPPED2/G6PC3/PTPRB/CTDSPL/PLPPR4/DUSP4/PTPN12/MTMR10/PPM1E/PTP4A1/PLCXD3/PTPN11/SSH2/NT5C3A/CTDSPL2
GO:0035091	phosphatidylinositol binding	34/1302	253/18337	0.00024651	0.006033	0.00485508	34	PLEKHA3/FCHO2/PFN2/ZFYVE26/KCNJ2/TWF1/FERMT2/WIPI2/ANKFY1/SNX2/AMER1/ARAP2/ZFYVE9/SDCBP/ZCCHC2/SNX3/PLEKHF2/FCHSD2/SYT1/PICALM/ATG2B/ANXA2/OGT/TTPA/ARFIP1/MARK1/TTPAL/CCDC88A/PIK3C2A/PLEKHB2/ZCCHC14/SH3PXD2A/DENND1B/SNX6
GO:0044390	ubiquitin-like protein conjugating enzyme binding	10/1302	39/18337	0.000298453	0.00711696	0.0057274	10	RNF217/DCUN1D4/ANKIB1/DCUN1D3/ARIH1/SIAH1/ZMYM2/RNF144A/RNF125/MARCHF6
GO:0001223	transcription coactivator binding	8/1302	26/18337	0.000310755	0.00722505	0.00581438	8	ESR1/RORA/CCNT2/FOXO1/THRB/AHR/CIT/NFATC1
GO:0030374	nuclear receptor coactivator activity	12/1302	54/18337	0.000327697	0.00738701	0.00594473	12	FGF2/SS18/TSG101/NCOA1/CCAR1/HMGA1/TMF1/MED13/MED1/MED14/ACTN4/ENY2
GO:0017002	activin-activated receptor activity	5/1302	10/18337	0.000333607	0.00738701	0.00594473	5	TGFBR2/ACVR2A/BMPR2/ACVR2B/TGFBR1
GO:0000900	translation repressor activity, mRNA regulatory element binding	6/1302	15/18337	0.000362616	0.0076388	0.00614736	6	CPEB2/CPEB3/PURA/PAIP2/CPEB1/CPEB4
GO:0048185	activin binding	6/1302	15/18337	0.000362616	0.0076388	0.00614736	6	TGFBR2/ACVR2A/SMAD7/ACVR2B/TGFBR3/TGFBR1
GO:0051219	phosphoprotein binding	16/1302	87/18337	0.00036962	0.0076388	0.00614736	16	PKD2/BTRC/PTPN3/PAFAH1B1/FBXW7/PHF6/NEDD4/YWHAB/IRS1/ABL2/RASA1/SH2D3C/PIK3R1/CBL/IGF2R/PTPN11
GO:0035035	histone acetyltransferase binding	8/1302	27/18337	0.000414321	0.00837648	0.00674101	8	ZBTB7A/HIF1A/SP1/GLI3/CITED2/MTF1/ETS1/EPAS1
GO:0031267	small GTPase binding	27/1302	190/18337	0.000427745	0.0084639	0.00681135	27	FGD4/CORO1C/RIC1/AP1G1/ANKFY1/TBC1D20/TRIOBP/DOCK4/DENND10/RABGAP1/PEX5L/TNFAIP1/SH3BP4/RAP1A/NGFR/PICALM/USP33/STRN3/RIMS1/KIF3B/HACE1/ALS2/CYRIB/DENND1B/AKAP13/EVI5/CCDC186
GO:0019199	transmembrane receptor protein kinase activity	15/1302	80/18337	0.000449848	0.00871581	0.00701408	15	EPHA4/FGFR1/TGFBR2/INSR/ACVR2A/BMPR2/ACVR2B/EPHA7/MET/CRIM1/TGFBR3/RET/TGFBR1/BMPR1A/IGF2R
GO:0045309	protein phosphorylated amino acid binding	12/1302	56/18337	0.000467625	0.00887533	0.00714246	12	BTRC/PTPN3/FBXW7/NEDD4/YWHAB/IRS1/ABL2/RASA1/SH2D3C/PIK3R1/CBL/PTPN11
GO:0005159	insulin-like growth factor receptor binding	6/1302	16/18337	0.000545457	0.0101455	0.00816464	6	INSR/IGF1/YWHAH/IRS1/PIK3R1/SOCS1
GO:0016791	phosphatase activity	35/1302	276/18337	0.000604506	0.0110233	0.00887108	35	PTPN3/PTPN4/PPM1D/EYA1/PIP4P1/PIP4P2/PPP3R1/PPP6C/PTPRR/PXYLP1/SYNJ1/PTPDC1/PPM1A/CTDNEP1/PPP1CC/RNGTT/MTMR4/PTEN/MINPP1/PTPRG/CTDSP2/EYA4/G6PC3/PTPRB/CTDSPL/PLPPR4/DUSP4/PTPN12/MTMR10/PPM1E/PTP4A1/PTPN11/SSH2/NT5C3A/CTDSPL2
GO:0018024	histone-lysine N-methyltransferase activity	10/1302	43/18337	0.000694144	0.0123752	0.009959	10	EZH1/ASH1L/SETD3/KMT2B/SETD7/KMT2A/ASH2L/MECOM/SETD2/EHMT1
GO:0005520	insulin-like growth factor binding	8/1302	29/18337	0.000705254	0.0123752	0.009959	8	INSR/CRIM1/IGFBP5/ITGAV/CCN2/ITGA6/IGFBPL1/IGF2R
GO:0061631	ubiquitin conjugating enzyme activity	9/1302	36/18337	0.000728052	0.0125387	0.0100906	9	UBE2Q1/UBE2E2/UBE2N/UBE2W/UBE2H/UBE2E3/UBE2D1/UBE2Z/UBE2E1
GO:0004114	3',5'-cyclic-nucleotide phosphodiesterase activity	7/1302	23/18337	0.000798218	0.0134971	0.0108619	7	PDE4D/PDE7A/PDE3B/PDE7B/PDE3A/PDE8B/PDE10A
GO:0034212	peptide N-acetyltransferase activity	11/1302	53/18337	0.00105763	0.0175643	0.0141349	11	NAA25/CLOCK/NAA30/NCOA1/NAA50/NAA15/HAT1/ATF2/KAT6A/BRPF1/KAT7
GO:0003779	actin binding	49/1302	439/18337	0.00110396	0.0180121	0.0144953	49	PFN2/CFL2/HNRNPU/FGD4/CAPZA2/SETD3/TWF1/CORO1C/CNN3/KLHL2/FERMT2/LIMA1/TRIOBP/PRKCE/MYLK/VASH2/PHACTR2/TPM3/CALD1/ADD3/YWHAH/KLHL20/ENC1/VASH1/ABL2/PAWR/RAI14/ALDOA/MYH9/COBLL1/MYO6/STK38L/GAS7/DIAPH2/LASP1/EPB41L1/DAAM2/TMOD2/TPM4/TMSB4X/CCDC88A/WDR1/ACTN4/MACF1/MED28/MAP1B/SPTBN1/FMNL3/SSH2
GO:0035591	signaling adaptor activity	13/1302	70/18337	0.00116021	0.0186033	0.0149711	13	MAP2K1/CDC42SE2/IRS1/FRS2/SH3RF1/DLG5/PIK3R1/G3BP2/MAGI2/PAG1/AKAP13/SPAG9/PTPN11
GO:0019001	guanyl nucleotide binding	45/1302	398/18337	0.00133187	0.0200661	0.0161483	45	RAB22A/RRAGD/ARL3/KRAS/INSR/SAR1B/RAB10/RASL11B/ARHGAP5/NKIRAS1/RAB5B/RHOC/MAB21L1/EIF5/RAP1B/GNAI3/RAP2C/SEPTIN2/GUCY1A1/RND3/ATL2/RAB5C/PRKG1/CDC42/RAB5A/GCH1/RAP1A/RNGTT/RIT2/PDE10A/MFN2/AK4/SAR1A/MIEF1/RHOT1/MPPED2/ARF3/ADSS2/RHOA/DIRAS2/RERG/RHOQ/RAB9A/IRGQ/RAB13
GO:0032561	guanyl ribonucleotide binding	45/1302	398/18337	0.00133187	0.0200661	0.0161483	45	RAB22A/RRAGD/ARL3/KRAS/INSR/SAR1B/RAB10/RASL11B/ARHGAP5/NKIRAS1/RAB5B/RHOC/MAB21L1/EIF5/RAP1B/GNAI3/RAP2C/SEPTIN2/GUCY1A1/RND3/ATL2/RAB5C/PRKG1/CDC42/RAB5A/GCH1/RAP1A/RNGTT/RIT2/PDE10A/MFN2/AK4/SAR1A/MIEF1/RHOT1/MPPED2/ARF3/ADSS2/RHOA/DIRAS2/RERG/RHOQ/RAB9A/IRGQ/RAB13
GO:0043539	protein serine/threonine kinase activator activity	9/1302	39/18337	0.00135176	0.0200661	0.0161483	9	CCNT2/MAP2K1/CAB39/STK4/RICTOR/SPRY2/ALS2/CALM3/CALM1
GO:0061650	ubiquitin-like protein conjugating enzyme activity	9/1302	39/18337	0.00135176	0.0200661	0.0161483	9	UBE2Q1/UBE2E2/UBE2N/UBE2W/UBE2H/UBE2E3/UBE2D1/UBE2Z/UBE2E1
GO:0004112	cyclic-nucleotide phosphodiesterase activity	7/1302	25/18337	0.00138089	0.0200661	0.0161483	7	PDE4D/PDE7A/PDE3B/PDE7B/PDE3A/PDE8B/PDE10A
GO:0030371	translation repressor activity	7/1302	25/18337	0.00138089	0.0200661	0.0161483	7	CPEB2/CPEB3/PURA/PAIP2/FMR1/CPEB1/CPEB4
GO:0005024	transforming growth factor beta-activated receptor activity	5/1302	13/18337	0.00142273	0.0203559	0.0163815	5	TGFBR2/BMPR2/TGFBR3/TGFBR1/BMPR1A
GO:0001882	nucleoside binding	44/1302	390/18337	0.0015625	0.0220171	0.0177183	44	RAB22A/RRAGD/ARL3/KRAS/INSR/SAR1B/RAB10/RASL11B/ARHGAP5/NKIRAS1/RAB5B/RHOC/MAB21L1/EIF5/RAP1B/GNAI3/RAP2C/SEPTIN2/GUCY1A1/RND3/ATL2/RAB5C/CDC42/RAB5A/GCH1/RAP1A/RNGTT/RIT2/MFN2/AK4/SAR1A/MIEF1/RHOT1/MPPED2/ARF3/ADSS2/ACTN4/RHOA/DIRAS2/RERG/RHOQ/RAB9A/IRGQ/RAB13
GO:0019209	kinase activator activity	15/1302	90/18337	0.00159535	0.0221445	0.0178208	15	CCNT2/MAP2K1/CDKN1A/CAB39/STK4/GREM1/WNK1/MOB1B/RICTOR/SPRY2/EPO/ALS2/CALM3/CALM1/NRG1
GO:0001046	core promoter sequence-specific DNA binding	9/1302	40/18337	0.00163594	0.022374	0.0180055	9	H3-3B/TBPL1/AGO1/NR3C1/FOXP1/SMARCB1/DR1/KLF10/BAZ2A
GO:0032550	purine ribonucleoside binding	43/1302	381/18337	0.00174286	0.0229291	0.0184523	43	RAB22A/RRAGD/ARL3/KRAS/INSR/SAR1B/RAB10/RASL11B/ARHGAP5/NKIRAS1/RAB5B/RHOC/MAB21L1/EIF5/RAP1B/GNAI3/RAP2C/SEPTIN2/GUCY1A1/RND3/ATL2/RAB5C/CDC42/RAB5A/GCH1/RAP1A/RNGTT/RIT2/MFN2/AK4/SAR1A/MIEF1/RHOT1/MPPED2/ARF3/ADSS2/RHOA/DIRAS2/RERG/RHOQ/RAB9A/IRGQ/RAB13
GO:0035198	miRNA binding	8/1302	33/18337	0.00176988	0.0229291	0.0184523	8	AGO4/AGO1/MATR3/FMR1/LIN28A/TUT4/ZC3H7B/PUM2
GO:0042974	retinoic acid receptor binding	7/1302	26/18337	0.00177515	0.0229291	0.0184523	7	NR4A2/NCOA1/RARB/HMGA1/MED1/NR1H2/ACTN4
GO:0043425	bHLH transcription factor binding	7/1302	26/18337	0.00177515	0.0229291	0.0184523	7	ISL1/SP1/SIRT1/FOXH1/KLF5/TCF12/TCF21
GO:0032182	ubiquitin-like protein binding	16/1302	101/18337	0.00195865	0.0249527	0.0200807	16	DCUN1D4/USP25/FBXW7/TSG101/UBE2N/DCUN1D3/WDR48/SOBP/NEDD4/UBR5/HERC2/UBXN2B/FAF2/TNFAIP3/RNF111/UCHL3
GO:0001883	purine nucleoside binding	43/1302	384/18337	0.0020253	0.0251137	0.0202104	43	RAB22A/RRAGD/ARL3/KRAS/INSR/SAR1B/RAB10/RASL11B/ARHGAP5/NKIRAS1/RAB5B/RHOC/MAB21L1/EIF5/RAP1B/GNAI3/RAP2C/SEPTIN2/GUCY1A1/RND3/ATL2/RAB5C/CDC42/RAB5A/GCH1/RAP1A/RNGTT/RIT2/MFN2/AK4/SAR1A/MIEF1/RHOT1/MPPED2/ARF3/ADSS2/RHOA/DIRAS2/RERG/RHOQ/RAB9A/IRGQ/RAB13
GO:0032549	ribonucleoside binding	43/1302	384/18337	0.0020253	0.0251137	0.0202104	43	RAB22A/RRAGD/ARL3/KRAS/INSR/SAR1B/RAB10/RASL11B/ARHGAP5/NKIRAS1/RAB5B/RHOC/MAB21L1/EIF5/RAP1B/GNAI3/RAP2C/SEPTIN2/GUCY1A1/RND3/ATL2/RAB5C/CDC42/RAB5A/GCH1/RAP1A/RNGTT/RIT2/MFN2/AK4/SAR1A/MIEF1/RHOT1/MPPED2/ARF3/ADSS2/RHOA/DIRAS2/RERG/RHOQ/RAB9A/IRGQ/RAB13
GO:0005041	low-density lipoprotein particle receptor activity	5/1302	14/18337	0.00208455	0.025177	0.0202613	5	VLDLR/LRP6/LDLR/LRP1B/LRP12
GO:0005172	vascular endothelial growth factor receptor binding	5/1302	14/18337	0.00208455	0.025177	0.0202613	5	VEGFA/VEGFC/GREM1/CD2AP/CCDC88A
GO:0097718	disordered domain specific binding	8/1302	34/18337	0.0021725	0.0255856	0.0205901	8	BCL2L2/GJA1/CLTC/KCNA1/SMAD2/FN1/CALM3/CALM1
GO:0004725	protein tyrosine phosphatase activity	16/1302	102/18337	0.0021734	0.0255856	0.0205901	16	PTPN3/PTPN4/EYA1/PTPRR/PTPDC1/RNGTT/MTMR4/PTEN/PTPRG/EYA4/PTPRB/DUSP4/PTPN12/PTP4A1/PTPN11/SSH2
GO:0030295	protein kinase activator activity	14/1302	84/18337	0.00225179	0.026177	0.021066	14	CCNT2/MAP2K1/CDKN1A/CAB39/STK4/GREM1/WNK1/RICTOR/SPRY2/EPO/ALS2/CALM3/CALM1/NRG1
GO:0042826	histone deacetylase binding	17/1302	113/18337	0.00254062	0.0291108	0.023427	17	BRMS1L/HIF1A/CCND1/WDTC1/PHF6/YWHAB/PHB/SP1/SATB2/LCOR/MEF2D/GLI3/HDAC4/SRF/CBX5/NR2C1/TCF21
GO:0019902	phosphatase binding	25/1302	193/18337	0.00256676	0.0291108	0.023427	25	SHOC2/STAT3/MASTL/PPP3R1/SPRED1/SMAD2/MET/ELL/SNX3/HSP90B1/NEK2/PPP1CC/PPP6R2/WNK1/AKAP11/MTMR4/PIK3R1/CTTNBP2NL/RPS6KB1/BOD1L1/STRN3/FOXO1/MAGI2/EIF2AK3/STRN
GO:0003785	actin monomer binding	7/1302	28/18337	0.00282051	0.0312271	0.0251301	7	PFN2/TWF1/LIMA1/PRKCE/ABL2/COBLL1/TMSB4X
GO:0050681	androgen receptor binding	7/1302	28/18337	0.00282051	0.0312271	0.0251301	7	ZBTB7A/FOXP1/DDX5/FOXP2/TMF1/FOXH1/TCF21
GO:0043021	ribonucleoprotein complex binding	19/1302	134/18337	0.00293438	0.0321055	0.025837	19	CPEB2/HNRNPU/DERL2/CPEB3/ERI1/PHF6/EIF5A2/SEC61A1/DDX5/FMR1/NAA15/SECISBP2L/RICTOR/CPEB1/CBX5/LIN28A/UHMK1/CPEB4/CPSF6
GO:0004693	cyclin-dependent protein serine/threonine kinase activity	7/1302	29/18337	0.00349354	0.0371609	0.0299053	7	CDK14/CDK17/CDK19/CDK6/CDK8/CDK2/CDK16
GO:0097472	cyclin-dependent protein kinase activity	7/1302	29/18337	0.00349354	0.0371609	0.0299053	7	CDK14/CDK17/CDK19/CDK6/CDK8/CDK2/CDK16
GO:0005158	insulin receptor binding	6/1302	22/18337	0.0035163	0.0371609	0.0299053	6	SNX2/IGF1/IRS1/PIK3R1/CCDC88A/PTPN11
GO:0042054	histone methyltransferase activity	10/1302	53/18337	0.00370015	0.0386645	0.0311154	10	EZH1/ASH1L/SETD3/KMT2B/SETD7/KMT2A/ASH2L/MECOM/SETD2/EHMT1
GO:0004690	cyclic nucleotide-dependent protein kinase activity	4/1302	10/18337	0.0037543	0.0387944	0.0312199	4	PRKX/PRKG1/PRKACB/AKAP13
GO:0061980	regulatory RNA binding	9/1302	45/18337	0.00385193	0.0393659	0.0316798	9	AGO4/DICER1/AGO1/MATR3/FMR1/LIN28A/TUT4/ZC3H7B/PUM2
GO:0030695	GTPase regulator activity	49/1302	467/18337	0.00391317	0.0395129	0.0317982	49	ARHGAP12/HACD3/NF1/AGFG1/RASGEF1B/CPEB2/FGD4/ARHGAP5/RIC1/BNIP2/TBC1D20/EIF5/DOCK4/DENND10/ARAP2/DENND5B/RABGAP1/ADGRB3/TBC1D9/SMAP1/VAV3/SH3BP4/RAP1A/TBC1D15/HERC2/TBC1D9B/SMAP2/RASA1/GIT2/SH2D3C/ACAP2/RGL2/DENND2B/TBC1D10B/SOS1/RGS4/RIMS1/ARHGAP26/ARFGEF1/CCDC88A/ALS2/RASAL2/ASAP3/ARHGEF12/DENND1B/DOCK3/AKAP13/EVI5/MCF2
GO:0035497	cAMP response element binding	5/1302	16/18337	0.00403645	0.0395129	0.0317982	5	NR4A3/HMGA2/ATF2/TCF12/CREB5
GO:0042800	histone methyltransferase activity (H3-K4 specific)	5/1302	16/18337	0.00403645	0.0395129	0.0317982	5	ASH1L/SETD3/KMT2B/KMT2A/ASH2L
GO:0017124	SH3 domain binding	18/1302	128/18337	0.00407612	0.0395129	0.0317982	18	GJA1/RUFY2/PLSCR4/DOCK4/SYNJ1/ADAM9/CCDC6/CBL/SH3BGRL2/QKI/CD2AP/SOS1/ADAM19/PTPN12/USP8/SH3KBP1/DOCK3/CIT
GO:0005525	GTP binding	41/1302	376/18337	0.00407875	0.0395129	0.0317982	41	RAB22A/RRAGD/ARL3/KRAS/INSR/SAR1B/RAB10/RASL11B/ARHGAP5/NKIRAS1/RAB5B/RHOC/MAB21L1/EIF5/RAP1B/GNAI3/RAP2C/SEPTIN2/GUCY1A1/RND3/ATL2/RAB5C/CDC42/RAB5A/GCH1/RAP1A/RNGTT/RIT2/MFN2/AK4/SAR1A/RHOT1/ARF3/ADSS2/RHOA/DIRAS2/RERG/RHOQ/RAB9A/IRGQ/RAB13
GO:0106306	protein serine phosphatase activity	12/1302	72/18337	0.00451188	0.0428168	0.034457	12	PPM1D/EYA1/PPP6C/PPM1A/CTDNEP1/PPP1CC/PTEN/CTDSP2/CTDSPL/DUSP4/PPM1E/SSH2
GO:0106307	protein threonine phosphatase activity	12/1302	72/18337	0.00451188	0.0428168	0.034457	12	PPM1D/EYA1/PPP6C/PPM1A/CTDNEP1/PPP1CC/PTEN/CTDSP2/CTDSPL/DUSP4/PPM1E/SSH2
GO:0003924	GTPase activity	36/1302	322/18337	0.00459474	0.0431627	0.0347353	36	RAB22A/RRAGD/ARL3/KRAS/SAR1B/RAB10/RASL11B/ARHGAP5/NKIRAS1/RAB5B/RHOC/RAP1B/GNAI3/RAP2C/SEPTIN2/RND3/ATL2/RAB5C/CDC42/RAB5A/GCH1/RAP1A/RASA1/RIT2/MFN2/SAR1A/RHOT1/RGS4/ARF3/TPPP/RHOA/DIRAS2/RERG/RHOQ/RAB9A/RAB13
GO:0004722	protein serine/threonine phosphatase activity	15/1302	101/18337	0.00500155	0.0465144	0.0374326	15	PPM1D/EYA1/PPP3R1/PPP6C/PPM1A/CTDNEP1/PPP1CC/MTMR4/PTEN/CTDSP2/CTDSPL/DUSP4/PPM1E/SSH2/CTDSPL2
GO:0019210	kinase inhibitor activity	12/1302	73/18337	0.00505903	0.0465831	0.0374879	12	LRP6/GSKIP/SPRED1/CDKN1A/YWHAB/CAMK2N1/TRIB2/WNK1/SPRY2/SOCS1/SPRED2/CIT
GO:0051721	protein phosphatase 2A binding	7/1302	31/18337	0.00519813	0.0473947	0.0381411	7	MASTL/CTTNBP2NL/RPS6KB1/BOD1L1/STRN3/FOXO1/STRN
GO:0005543	phospholipid binding	47/1302	451/18337	0.00527923	0.0474695	0.0382013	47	PLEKHA3/NF1/FCHO2/PFN2/ZFYVE26/KCNJ2/NUP35/TWF1/FERMT2/WIPI2/ANKFY1/SNX2/F3/AMER1/ARAP2/ZFYVE9/THBS1/SDCBP/ZCCHC2/SNX3/JAG1/PLEKHF2/FCHSD2/C2CD5/ANXA4/SYT1/PICALM/ATG2B/ANXA2/OGT/BSCL2/TTPA/UNC13C/ARFIP1/ARHGAP26/MARK1/TTPAL/CCDC88A/PIK3C2A/PLEKHB2/ZCCHC14/SH3PXD2A/MAP1B/DENND1B/SNX6/SPTBN1/SYT3
GO:0030228	lipoprotein particle receptor activity	5/1302	17/18337	0.00538806	0.0474695	0.0382013	5	VLDLR/LRP6/LDLR/LRP1B/LRP12
GO:0046965	retinoid X receptor binding	5/1302	17/18337	0.00538806	0.0474695	0.0382013	5	NR4A2/NCOA1/RARB/HMGA1/NR1H2
GO:0004596	peptide alpha-N-acetyltransferase activity	4/1302	11/18337	0.00557054	0.0474695	0.0382013	4	NAA25/NAA30/NAA50/NAA15
GO:0005078	MAP-kinase scaffold activity	4/1302	11/18337	0.00557054	0.0474695	0.0382013	4	MAP2K1/SH3RF1/AKAP13/SPAG9
GO:0035252	UDP-xylosyltransferase activity	4/1302	11/18337	0.00557054	0.0474695	0.0382013	4	POGLUT1/GXYLT1/XYLT2/XYLT1
GO:0042285	xylosyltransferase activity	4/1302	11/18337	0.00557054	0.0474695	0.0382013	4	POGLUT1/GXYLT1/XYLT2/XYLT1
GO:0035925	mRNA 3'-UTR AU-rich region binding	6/1302	24/18337	0.00561467	0.0474695	0.0382013	6	CPEB2/CPEB3/RBM24/ZFP36L2/ZFP36L1/CPEB1

## Sheet: Figure 3B
Figure 3B. KEGG pathway of genes targeted by differentially expressed host miRNAs.
ID	Description	Gene Ratio	Bg Ratio	P value	Adjusted P	Q value	Count	Genes
hsa04218	Cellular senescence	35/604	156/8093	2.24e-09	6.51e-07	4.78e-07	35	BTRC/E2F5/CCND2/E2F1/KRAS/TGFBR2/CCND1/RBL2/AKT3/PPP3R1/MAP2K1/E2F3/CDKN1A/SMAD2/CHEK1/RASSF5/PPP1CC/SIRT1/CDK6/PTEN/PIK3R1/ZFP36L2/TGFBR1/HIPK1/ZFP36L1/LIN54/HIPK2/ETS1/ATM/FOXO1/CALM3/CALM1/CDK2/FOXO3/NFATC1
hsa04144	Endocytosis	45/604	252/8093	2.49e-08	3.62e-06	2.66e-06	45	RAB22A/TGFBR2/RUFY2/CAPZA2/NEDD4L/RAB10/CLTC/TSG101/RAB5B/SNX2/SMAD2/ARAP2/LDLR/KIF5C/NEDD4/ZFYVE9/VPS4A/WASHC4/RAB5C/SMAP1/SNX3/CDC42/PSD3/RAB5A/RAB11FIP2/KIF5A/SMAP2/SH3GL2/SMURF2/GIT2/WWP1/CBL/PARD6B/ACAP2/TGFBR1/STAM2/ARF3/ARFGEF1/KIF5B/RHOA/ASAP3/USP8/SH3KBP1/SNX6/IGF2R
hsa04151	PI3K-Akt signaling pathway	56/604	354/8093	4.14e-08	4.02e-06	2.95e-06	56	BDNF/FGF2/CCND2/MYB/KRAS/FGFR1/INSR/SGK1/CCND1/RBL2/AKT3/ITGB8/LAMA3/MAP2K1/VEGFA/VEGFC/IGF1/FGF7/CDKN1A/MET/EREG/YWHAB/THBS1/YWHAZ/BCL2L11/EIF4E/YWHAH/CSF1/IRS1/HSP90B1/ITGAV/YWHAQ/ITGA6/PDGFA/NGFR/CDK6/PTEN/PIK3R1/FN1/PPP2R3C/RELN/RPS6KB1/SOS1/G6PC3/ATF2/EPO/MAGI2/CHRM2/KITLG/LAMC1/CREB5/CDK2/COL6A6/PPP2R5B/FOXO3/FGF9
hsa05211	Renal cell carcinoma	20/604	69/8093	7.54e-08	5.48e-06	4.03e-06	20	KRAS/HIF1A/AKT3/MAP2K1/VEGFA/RAP1B/CDKN1A/CUL2/MET/GAB1/EGLN3/CDC42/RAP1A/PIK3R1/ARNT/SOS1/ETS1/EGLN1/EPAS1/PTPN11
hsa04014	Ras signaling pathway	41/604	232/8093	1.43e-07	7.97e-06	5.85e-06	41	BDNF/NF1/SHOC2/FGF2/KRAS/FGFR1/INSR/AKT3/MAP2K1/RAB5B/VEGFA/VEGFC/IGF1/FGF7/RAP1B/MET/GAB1/RAB5C/CSF1/CDC42/RASSF5/ABL2/STK4/RAB5A/RAP1A/PRKACB/PDGFA/NGFR/RASA1/PIK3R1/RGL2/GRIN2A/SOS1/ETS1/RASAL2/RHOA/KITLG/CALM3/CALM1/FGF9/PTPN11
hsa05223	Non-small cell lung cancer	20/604	72/8093	1.64e-07	7.97e-06	5.85e-06	20	STAT3/E2F1/KRAS/CCND1/AKT3/MAP2K1/E2F3/CDKN1A/MET/KIF5C/RASSF5/STK4/RARB/KIF5A/CDK6/RET/PIK3R1/SOS1/KIF5B/FOXO3
hsa04068	FoxO signaling pathway	28/604	131/8093	2.73e-07	1.13e-05	8.33e-06	28	STAT3/CCND2/KRAS/TGFBR2/INSR/SGK1/CCND1/RBL2/AKT3/MAP2K1/IGF1/CDKN1A/CCNG2/BCL2L11/IRS1/STK4/SETD7/PLK2/SIRT1/PTEN/PIK3R1/TGFBR1/SOS1/G6PC3/ATM/FOXO1/CDK2/FOXO3
hsa04010	MAPK signaling pathway	47/604	294/8093	3.92e-07	1.42e-05	1.05e-05	47	MAP3K2/BDNF/NF1/FGF2/KRAS/FGFR1/RPS6KA3/RPS6KA5/TGFBR2/INSR/AKT3/PPP3R1/MAP2K1/VEGFA/VEGFC/IGF1/FGF7/CACNA2D1/RAP1B/MET/PTPRR/EREG/PPM1A/MKNK1/CSF1/CDC42/MAP4K3/MAP3K1/STK4/RAP1A/PRKACB/MAP3K7/PDGFA/NGFR/RASA1/TGFBR1/SOS1/SRF/MECOM/ATF2/DUSP4/CACNA1C/KITLG/MAPK7/FGF9/CACNG8/NFATC1
hsa05202	Transcriptional misregulation in cancer	34/604	192/8093	1.62e-06	5.24e-05	3.84e-05	34	CDK14/CCND2/BCL11B/TGFBR2/EYA1/SS18/H3-3B/PBX3/CCNT2/ETV1/IGF1/NR4A3/RUNX1T1/CDKN1A/MET/SP1/DDX5/PAX3/BMI1/H3-5/ETV6/HOXA9/SIX4/RUNX1/PDGFA/NGFR/HMGA2/AFF1/KMT2A/ATM/FOXO1/MLLT3/MAF/MYCN
hsa01521	EGFR tyrosine kinase inhibitor resistance	19/604	79/8093	3.67e-06	0.000105891	7.78e-05	19	NF1/STAT3/FGF2/KRAS/AKT3/MAP2K1/VEGFA/IGF1/MET/GAB1/BCL2L11/EIF4E/PDGFA/PTEN/PIK3R1/RPS6KB1/SOS1/NRG1/FOXO3
hsa04390	Hippo signaling pathway	29/604	157/8093	4e-06	0.000105891	7.78e-05	29	AXIN2/BTRC/CCND2/TGFBR2/CCND1/FRMD6/BMPR2/SMAD7/LATS2/SMAD2/YWHAB/YWHAZ/PATJ/YWHAH/PPP1CC/YWHAQ/CCN2/TEAD1/TCF7L2/DLG5/PARD6B/MOB1B/AMOT/TGFBR1/PALS1/SNAI2/TEAD3/BMPR1A/BBC3
hsa04015	Rap1 signaling pathway	35/604	210/8093	4.79e-06	0.000116068	8.52e-05	35	FGF2/PFN2/KRAS/FGFR1/INSR/AKT3/MAP2K1/VEGFA/VEGFC/IGF1/FGF7/RAP1B/DOCK4/GNAI3/MET/THBS1/CSF1/CDC42/PRKD1/RASSF5/VAV3/RAP1A/PDGFA/CNR1/NGFR/PIK3R1/PARD6B/GRIN2A/MAGI2/RHOA/KITLG/CALM3/CALM1/FGF9/CTNND1
hsa05205	Proteoglycans in cancer	34/604	205/8093	7.3e-06	0.000163513	0.000120069	34	STAT3/FGF2/ESR1/KRAS/FGFR1/PTCH1/HIF1A/CCND1/AKT3/MAP2K1/VEGFA/PDCD4/IGF1/TIMP3/CDKN1A/SMAD2/MET/GAB1/THBS1/DDX5/CDC42/FRS2/VAV3/ITGAV/PPP1CC/PRKACB/PIK3R1/CBL/FN1/RPS6KB1/SOS1/RHOA/ARHGEF12/PTPN11
hsa05224	Breast cancer	27/604	147/8093	9.59e-06	0.000199291	0.000146341	27	AXIN2/FGF2/LRP6/ESR1/E2F1/KRAS/FGFR1/CCND1/AKT3/DLL1/MAP2K1/E2F3/IGF1/FGF7/CDKN1A/SP1/JAG1/NCOA1/TCF7L2/CSNK1A1/CDK6/PTEN/PIK3R1/RPS6KB1/SOS1/NOTCH1/FGF9
hsa04350	TGF-beta signaling pathway	20/604	94/8093	1.49e-05	0.00028095	0.000206304	20	E2F5/TGFBR2/ACVR2A/TGIF2/BMPR2/SMAD7/RGMA/BAMBI/ACVR2B/RGMB/SMAD2/ZFYVE9/THBS1/SP1/GREM1/SMURF2/TGFBR1/RPS6KB1/RHOA/BMPR1A
hsa05218	Melanoma	17/604	72/8093	1.54e-05	0.00028095	0.000206304	17	FGF2/E2F1/KRAS/FGFR1/CCND1/AKT3/MAP2K1/E2F3/IGF1/FGF7/CDKN1A/MET/PDGFA/CDK6/PTEN/PIK3R1/FGF9
hsa04910	Insulin signaling pathway	25/604	137/8093	2.29e-05	0.000392584	0.000288278	25	KRAS/INSR/AKT3/TRIP10/FASN/MAP2K1/MKNK1/EIF4E/HK2/IRS1/PDE3B/PPP1CC/PRKACB/FLOT2/PIK3R1/CBL/RPS6KB1/SOS1/G6PC3/FOXO1/CALM3/RHOQ/CALM1/SOCS1/SREBF1
hsa04120	Ubiquitin mediated proteolysis	25/604	142/8093	4.3e-05	0.000686327	0.000503977	25	BTRC/FBXW7/NEDD4L/UBE2Q1/UBE2E2/UBE4B/UBE2N/UBE2W/SIAH1/CUL2/NEDD4/MAP3K1/CUL4A/UBR5/UBE2H/HERC2/UBE2E3/SMURF2/UBE2D1/WWP1/CBL/UBE2Z/UBE2E1/UBE4A/SOCS1
hsa04066	HIF-1 signaling pathway	21/604	109/8093	4.48e-05	0.000686327	0.000503977	21	STAT3/INSR/HIF1A/PFKP/AKT3/MAP2K1/VEGFA/IGF1/CDKN1A/CUL2/MKNK1/EGLN3/EIF4E/HK2/ALDOA/PIK3R1/ARNT/RPS6KB1/EDN1/EPO/EGLN1
hsa05206	MicroRNAs in cancer	43/604	310/8093	4.84e-05	0.000703918	0.000516894	43	STAT3/CCND2/E2F1/KRAS/RECK/RPS6KA5/BCL2L2/KIF23/DICER1/CCND1/BMPR2/MAP2K1/VEGFA/PDCD4/E2F3/TIMP3/CDKN1A/PRKCE/MET/ZFPM2/THBS1/BCL2L11/FOXP1/BMI1/IRS1/PDGFA/HDAC4/CCNG1/SIRT1/HMGA2/CDK6/PTEN/PIK3R1/SOS1/ATM/HNRNPK/SPRY2/ZEB2/RHOA/NOTCH1/MAPK7/SOCS1/SLC7A1
hsa04722	Neurotrophin signaling pathway	22/604	119/8093	5.74e-05	0.000794887	0.000583693	22	BDNF/KRAS/RPS6KA3/RPS6KA5/AKT3/MAP2K1/RAP1B/GAB1/CDC42/MAP3K1/IRS1/FRS2/RAP1A/NGFR/PIK3R1/SOS1/RHOA/CALM3/CALM1/MAPK7/FOXO3/PTPN11
hsa04919	Thyroid hormone signaling pathway	22/604	121/8093	7.45e-05	0.000985413	0.000723599	22	ESR1/KRAS/MED12L/HIF1A/CCND1/PFKP/AKT3/MAP2K1/RCAN1/ITGAV/NCOA1/PRKACB/MED13/ATP1B1/PIK3R1/RCAN2/SLC16A2/MED1/MED14/FOXO1/THRB/NOTCH1
hsa05225	Hepatocellular carcinoma	27/604	168/8093	0.000110617	0.00139954	0.0010277	27	AXIN2/LRP6/E2F1/KRAS/TGFBR2/CCND1/AKT3/MAP2K1/E2F3/CDKN1A/SMAD2/MET/GAB1/TCF7L2/SMARCA2/CSNK1A1/CDK6/PTEN/PIK3R1/NFE2L2/TGFBR1/RPS6KB1/ARID2/SMARCB1/SOS1/SMARCC1/SMARCC2
hsa05212	Pancreatic cancer	16/604	76/8093	0.000120717	0.00140515	0.00103181	16	STAT3/E2F1/KRAS/TGFBR2/CCND1/AKT3/MAP2K1/VEGFA/E2F3/CDKN1A/SMAD2/CDC42/CDK6/PIK3R1/TGFBR1/RPS6KB1
hsa05220	Chronic myeloid leukemia	16/604	76/8093	0.000120717	0.00140515	0.00103181	16	E2F1/KRAS/TGFBR2/CCND1/AKT3/MAP2K1/E2F3/CDKN1A/RUNX1/CDK6/PIK3R1/CBL/TGFBR1/SOS1/MECOM/PTPN11
hsa05210	Colorectal cancer	17/604	86/8093	0.00016942	0.0018962	0.0013924	17	AXIN2/KRAS/TGFBR2/CCND1/AKT3/MAP2K1/CDKN1A/SMAD2/EREG/BCL2L11/TCF7L2/PIK3R1/TGFBR1/RPS6KB1/SOS1/RHOA/BBC3
hsa04510	Focal adhesion	30/604	201/8093	0.000185381	0.00193267	0.00141918	30	CCND2/CCND1/AKT3/ITGB8/LAMA3/ARHGAP5/MAP2K1/VEGFA/VEGFC/IGF1/RAP1B/MET/MYLK/THBS1/CDC42/VAV3/ITGAV/PPP1CC/RAP1A/ITGA6/PDGFA/PTEN/PIK3R1/FN1/RELN/SOS1/ACTN4/RHOA/LAMC1/COL6A6
hsa04934	Cushing syndrome	25/604	155/8093	0.000185961	0.00193267	0.00141918	25	AXIN2/E2F1/CCND1/MAP2K1/E2F3/RAP1B/CDKN1A/GNAI3/LDLR/SP1/KCNK2/RAP1A/PRKACB/TCF7L2/CDK6/PDE8B/ARNT/KMT2A/ASH2L/ATF2/CACNA1C/USP8/CREB5/CDK2/AHR
hsa05215	Prostate cancer	18/604	97/8093	0.000253754	0.00243679	0.00178936	18	E2F1/KRAS/FGFR1/CCND1/AKT3/MAP2K1/E2F3/IGF1/CDKN1A/HSP90B1/PDGFA/TCF7L2/PTEN/PIK3R1/SOS1/FOXO1/CREB5/CDK2
hsa05226	Gastric cancer	24/604	149/8093	0.000254016	0.00243679	0.00178936	24	AXIN2/FGF2/LRP6/E2F1/KRAS/TGFBR2/CCND1/AKT3/MAP2K1/E2F3/FGF7/CDKN1A/SMAD2/MET/GAB1/RARB/TCF7L2/CSNK1A1/PIK3R1/TGFBR1/RPS6KB1/SOS1/CDK2/FGF9
hsa04115	p53 signaling pathway	15/604	73/8093	0.00025959	0.00243679	0.00178936	15	CCND2/PPM1D/CCND1/IGF1/SIAH1/CDKN1A/CHEK1/CCNG2/THBS1/CCNG1/CDK6/PTEN/ATM/CDK2/BBC3
hsa01522	Endocrine resistance	18/604	98/8093	0.000289752	0.00263494	0.00193486	18	ESR1/E2F1/KRAS/CCND1/AKT3/DLL1/MAP2K1/E2F3/IGF1/CDKN1A/SP1/JAG1/PRKACB/PIK3R1/RPS6KB1/MED1/SOS1/NOTCH1
hsa04550	Signaling pathways regulating pluripotency of stem cells	23/604	143/8093	0.000347031	0.00302998	0.00222495	23	AXIN2/STAT3/FGF2/KRAS/FGFR1/ACVR2A/AKT3/BMPR2/MAP2K1/IGF1/ACVR2B/ISL1/SMAD2/BMI1/JARID2/LIF/PIK3R1/PCGF5/ZFHX3/KAT6A/BMPR1A/MYF5/PCGF3
hsa05214	Glioma	15/604	75/8093	0.000354019	0.00302998	0.00222495	15	E2F1/KRAS/CCND1/AKT3/MAP2K1/E2F3/IGF1/CDKN1A/PDGFA/CDK6/PTEN/PIK3R1/SOS1/CALM3/CALM1
hsa04152	AMPK signaling pathway	20/604	120/8093	0.000518922	0.00431447	0.00316816	20	INSR/CCND1/PFKP/RAB10/AKT3/FASN/IGF1/CAB39/IRS1/MAP3K7/SIRT1/PIK3R1/PPP2R3C/RPS6KB1/G6PC3/FOXO1/CREB5/PPP2R5B/FOXO3/SREBF1
hsa04211	Longevity regulating pathway	16/604	89/8093	0.0007929	0.00640928	0.0047064	16	KRAS/INSR/AKT3/IGF1/EIF4E/IRS1/PRKACB/SIRT1/PIK3R1/ATG13/RPS6KB1/FOXO1/ATF2/EHMT1/CREB5/FOXO3
hsa05165	Human papillomavirus infection	41/604	331/8093	0.00082434	0.00648333	0.00476077	41	AXIN2/CCND2/E2F1/KRAS/CCND1/RBL2/TBPL1/AKT3/ITGB8/LAMA3/MAP2K1/VEGFA/ATP6V1A/CDKN1A/THBS1/PATJ/CDC42/JAG1/ITGAV/PRKACB/ITGA6/TCF7L2/CSNK1A1/CDK6/PTEN/PIK3R1/PARD6B/FN1/PPP2R3C/RELN/RPS6KB1/PALS1/SOS1/ATM/FOXO1/NOTCH1/LAMC1/CREB5/CDK2/COL6A6/PPP2R5B
hsa04933	AGE-RAGE signaling pathway in diabetic complications	17/604	100/8093	0.00106178	0.00813099	0.00597067	17	STAT3/KRAS/TGFBR2/CCND1/AKT3/VEGFA/VEGFC/F3/PRKCE/SMAD2/CDC42/PIK3R1/FN1/TGFBR1/EDN1/FOXO1/NFATC1
hsa04917	Prolactin signaling pathway	13/604	70/8093	0.00176888	0.0131985	0.00969183	13	STAT3/CCND2/ESR1/KRAS/CCND1/AKT3/MAP2K1/SOCS6/SOCS5/PIK3R1/SOS1/SOCS1/FOXO3
hsa04520	Adherens junction	13/604	71/8093	0.00202142	0.0147059	0.0107987	13	FGFR1/TGFBR2/INSR/MET/CDC42/MAP3K7/TCF7L2/TGFBR1/PTPRB/SNAI2/ACTN4/RHOA/CTNND1
hsa04110	Cell cycle	19/604	126/8093	0.00240353	0.0170312	0.0125061	19	E2F5/CCND2/E2F1/WEE1/CCND1/RBL2/E2F3/CDKN1A/SMAD2/CHEK1/YWHAB/YWHAZ/YWHAH/YWHAQ/CDK6/ATM/CDK2/RAD21/STAG1
hsa04340	Hedgehog signaling pathway	11/604	56/8093	0.00246698	0.0170312	0.0125061	11	BTRC/CCND2/PTCH1/CCND1/SPOPL/MOSMO/PRKACB/GLI3/CSNK1A1/SMURF2/CSNK1G3
hsa04931	Insulin resistance	17/604	108/8093	0.00251663	0.0170312	0.0125061	17	STAT3/RPS6KA3/INSR/AKT3/PRKCE/IRS1/PPP1CC/PTEN/PIK3R1/OGT/RPS6KB1/G6PC3/FOXO1/NR1H2/CREB5/SREBF1/PTPN11
hsa05219	Bladder cancer	9/604	41/8093	0.00272162	0.0179998	0.0132174	9	E2F1/KRAS/RPS6KA5/CCND1/MAP2K1/VEGFA/E2F3/CDKN1A/THBS1
hsa04022	cGMP-PKG signaling pathway	23/604	167/8093	0.0029932	0.019356	0.0142133	23	INSR/AKT3/PPP3R1/MAP2K1/PRKCE/GNAI3/MYLK/GUCY1A1/PRKG1/IRS1/PDE3B/PPP1CC/MEF2D/PDE3A/ATP1B1/SRF/ATF2/CACNA1C/RHOA/CALM3/CALM1/CREB5/NFATC1
hsa05222	Small cell lung cancer	15/604	92/8093	0.00312414	0.0196643	0.0144397	15	E2F1/CCND1/AKT3/LAMA3/E2F3/CDKN1A/ITGAV/RARB/ITGA6/CDK6/PTEN/PIK3R1/FN1/LAMC1/CDK2
hsa04810	Regulation of actin cytoskeleton	28/604	218/8093	0.00317603	0.0196643	0.0144397	28	FGF2/PFN2/KRAS/FGFR1/CFL2/ITGB8/MAP2K1/FGF7/MYLK/CDC42/VAV3/ITGAV/PPP1CC/MYH9/ITGA6/PDGFA/PIK3R1/FN1/DIAPH2/SOS1/TMSB4X/CHRM2/PIP4K2A/ACTN4/RHOA/ARHGEF12/FGF9/SSH2
hsa05213	Endometrial cancer	11/604	58/8093	0.00329326	0.0199654	0.0146608	11	AXIN2/KRAS/CCND1/AKT3/MAP2K1/CDKN1A/TCF7L2/PTEN/PIK3R1/SOS1/FOXO3
hsa04720	Long-term potentiation	12/604	67/8093	0.00359038	0.0213225	0.0156573	12	KRAS/RPS6KA3/PPP3R1/MAP2K1/RAP1B/PPP1CC/RAP1A/PRKACB/GRIN2A/CACNA1C/CALM3/CALM1
hsa04114	Oocyte meiosis	19/604	131/8093	0.0037579	0.021871	0.0160601	19	BTRC/CPEB2/RPS6KA3/CPEB3/PPP3R1/MAP2K1/IGF1/YWHAB/YWHAZ/YWHAH/PPP1CC/YWHAQ/PRKACB/CPEB1/CALM3/CALM1/CDK2/CPEB4/PPP2R5B
hsa05207	Chemical carcinogenesis - receptor activation	27/604	212/8093	0.00419639	0.0239441	0.0175824	27	STAT3/FGF2/ESR1/E2F1/KRAS/RPS6KA3/CCND1/AKT3/DLL1/MAP2K1/VEGFA/FGF7/GNAI3/JAG1/HSP90B1/KPNA6/PRKACB/PIK3R1/ARNT/RPS6KB1/SOS1/ATF2/CACNA1C/KLF5/CREB5/AHR/FGF9
hsa04960	Aldosterone-regulated sodium reabsorption	8/604	37/8093	0.0051113	0.0279763	0.0205433	8	KRAS/INSR/SGK1/NEDD4L/IGF1/IRS1/ATP1B1/PIK3R1
hsa05216	Thyroid cancer	8/604	37/8093	0.0051113	0.0279763	0.0205433	8	KRAS/CCND1/MAP2K1/CDKN1A/TPM3/TCF7L2/CCDC6/RET
hsa05230	Central carbon metabolism in cancer	12/604	70/8093	0.00519149	0.0279763	0.0205433	12	KRAS/FGFR1/HIF1A/PFKP/AKT3/MAP2K1/MET/HK2/G6PD/RET/PTEN/PIK3R1
hsa03018	RNA degradation	13/604	79/8093	0.00530367	0.0280612	0.0206056	13	CNOT6L/BTG2/PFKP/BTG3/XRN1/CNOT7/PAN3/DCP1A/HSPD1/DCP2/TOB1/TENT4B/DDX6
hsa04213	Longevity regulating pathway - multiple species	11/604	62/8093	0.0056061	0.0291317	0.0213917	11	KRAS/INSR/AKT3/IGF1/IRS1/PRKACB/SIRT1/PIK3R1/RPS6KB1/FOXO1/FOXO3
hsa04137	Mitophagy - animal	12/604	72/8093	0.0065429	0.0334033	0.0245283	12	E2F1/KRAS/HIF1A/USP15/SP1/TBC1D15/CITED2/MFN2/RHOT1/USP8/FOXO3/EIF2AK3
hsa04371	Apelin signaling pathway	19/604	138/8093	0.00666669	0.0334484	0.0245615	19	KRAS/CCND1/AKT3/MAP2K1/PRKCE/GNAI3/SMAD2/MYLK/APLN/JAG1/PDE3B/PRKACB/CCN2/MEF2D/HDAC4/TGFBR1/RPS6KB1/CALM3/CALM1
hsa04140	Autophagy - animal	19/604	141/8093	0.00837779	0.041321	0.0303424	19	RRAGD/KRAS/HIF1A/AKT3/ATG16L1/MAP2K1/WIPI2/IRS1/PRKACB/MAP3K7/MTMR4/ATG2B/PTEN/PIK3R1/ATG13/NRBF2/RPS6KB1/VMP1/EIF2AK3
hsa05203	Viral carcinogenesis	25/604	204/8093	0.00931269	0.0451665	0.0331662	25	STAT3/CCND2/KRAS/CCND1/RBL2/TBPL1/CDKN1A/CHEK1/YWHAB/YWHAZ/YWHAH/CDC42/YWHAQ/PRKACB/HDAC4/CDK6/PIK3R1/GTF2A2/SRF/HNRNPK/ATF2/ACTN4/RHOA/CREB5/CDK2
hsa05221	Acute myeloid leukemia	11/604	67/8093	0.0101126	0.0482421	0.0354247	11	STAT3/KRAS/CCND1/AKT3/MAP2K1/RUNX1T1/RUNX1/TCF7L2/PIK3R1/RPS6KB1/SOS1
hsa04921	Oxytocin signaling pathway	20/604	154/8093	0.0103434	0.0485474	0.0356489	20	KRAS/CCND1/KCNJ2/PPP3R1/MAP2K1/CACNA2D1/RCAN1/CDKN1A/GNAI3/MYLK/GUCY1A1/PPP1CC/PRKACB/CACNA1C/RHOA/CALM3/CALM1/MAPK7/CACNG8/NFATC1

## Sheet: Figure 3C
Figure 3C. List of target genes modulated by host DE miRNAs.
Target genes of up-regulated miRNAs			Target genes of down-regulated miRNAs
Gene Symbol	MicroRNA	Integrated Score	Gene Symbol	MicroRNA	Integrated Score
ANO3	hsa-miR-103a-3p	0.887226	TWF1	hsa-miR-486-5p	0.746221
MED26	hsa-miR-103a-3p	0.886792	BTAF1	hsa-miR-486-5p	0.744476
NF1	hsa-miR-103a-3p	0.886289	PTEN	hsa-miR-486-5p	0.728043
SNRK	hsa-miR-103a-3p	0.886147	DENND2B	hsa-miR-486-5p	0.713659
ZHX1	hsa-miR-103a-3p	0.880898	ARID4B	hsa-miR-486-5p	0.702582
AGO4	hsa-miR-103a-3p	0.866629	HAT1	hsa-miR-486-5p	0.69183
AGFG1	hsa-miR-103a-3p	0.859454	FOXO1	hsa-miR-486-5p	0.690015
AXIN2	hsa-miR-103a-3p	0.85589	MARK1	hsa-miR-486-5p	0.687146
NDEL1	hsa-miR-103a-3p	0.851156	SP5	hsa-miR-486-5p	0.678221
ARMC1	hsa-miR-103a-3p	0.849583	PRRC2C	hsa-miR-486-5p	0.670804
NPAS3	hsa-miR-103a-3p	0.839344	GPX8	hsa-miR-486-5p	0.668369
RNF38	hsa-miR-103a-3p	0.837292	PIK3R1	hsa-miR-486-5p	0.66443
CPEB3	hsa-miR-103a-3p	0.836974	ABHD17B	hsa-miR-486-5p	0.657001
CHD1	hsa-miR-103a-3p	0.835781	CSPG5	hsa-miR-486-5p	0.656125
PHF20	hsa-miR-103a-3p	0.835398	TOB1	hsa-miR-486-5p	0.652331
DICER1	hsa-miR-103a-3p	0.831742	ARMC8	hsa-miR-486-5p	0.645918
RAB10	hsa-miR-103a-3p	0.828426	AFF3	hsa-miR-486-5p	0.640486
KIF23	hsa-miR-103a-3p	0.827617	ARHGAP5	hsa-miR-486-5p	0.638471
TWF1	hsa-miR-103a-3p	0.827061	ZC3HAV1	hsa-miR-486-5p	0.635962
TMEM47	hsa-miR-103a-3p	0.825308	COL6A6	hsa-miR-486-5p	0.63374
AQP11	hsa-miR-103a-3p	0.824406	SRSF3	hsa-miR-486-5p	0.631738
NFIA	hsa-miR-103a-3p	0.824233	COPS7B	hsa-miR-486-5p	0.630032
ATP13A3	hsa-miR-103a-3p	0.821114	DOCK3	hsa-miR-486-5p	0.623598
ZNRF2	hsa-miR-103a-3p	0.820138	GPR153	hsa-miR-486-5p	0.612765
RBM24	hsa-miR-103a-3p	0.817639	TANC1	hsa-miR-486-5p	0.606034
GSKIP	hsa-miR-103a-3p	0.81719	CADM1	hsa-miR-486-5p	0.604547
FERMT2	hsa-miR-103a-3p	0.816611	BTBD3	hsa-miR-486-5p	0.601879
GPCPD1	hsa-miR-103a-3p	0.815718	PSMB8	hsa-miR-451a	0.690691
RYBP	hsa-miR-103a-3p	0.812311	EMSY	hsa-miR-451a	0.690159
GPC6	hsa-miR-103a-3p	0.810628	ATF2	hsa-miR-451a	0.684263
AMMECR1	hsa-miR-103a-3p	0.806566	AEBP2	hsa-miR-451a	0.671935
RCAN1	hsa-miR-103a-3p	0.805632	CAB39	hsa-miR-451a	0.658627
AGO1	hsa-miR-103a-3p	0.805321	MIF	hsa-miR-451a	0.65621
SUN2	hsa-miR-103a-3p	0.804761	HACD3	hsa-miR-206	0.898258
PRKCE	hsa-miR-103a-3p	0.803812	BDNF	hsa-miR-206	0.889029
PPIP5K2	hsa-miR-103a-3p	0.803461	GLCCI1	hsa-miR-206	0.888196
CAB39	hsa-miR-103a-3p	0.802778	C5orf51	hsa-miR-206	0.888069
USP42	hsa-miR-103a-3p	0.80267	TNKS2	hsa-miR-206	0.869216
ACVR2B	hsa-miR-103a-3p	0.800979	UST	hsa-miR-206	0.868847
CACNA2D1	hsa-miR-103a-3p	0.800442	CDK14	hsa-miR-206	0.866774
EIF5	hsa-miR-103a-3p	0.800364	SLC44A1	hsa-miR-206	0.854628
ZFPM2	hsa-miR-103a-3p	0.799317	TRIM2	hsa-miR-206	0.853824
CHD2	hsa-miR-103a-3p	0.796282	GJA1	hsa-miR-206	0.847992
OTUD4	hsa-miR-103a-3p	0.794966	HNRNPU	hsa-miR-206	0.84464
PDCD10	hsa-miR-103a-3p	0.792955	E2F5	hsa-miR-206	0.838886
AFF4	hsa-miR-103a-3p	0.792857	CPED1	hsa-miR-206	0.838752
HACD2	hsa-miR-103a-3p	0.791892	MMD	hsa-miR-206	0.832824
KIF21A	hsa-miR-103a-3p	0.791831	TAGLN2	hsa-miR-206	0.828453
SCN2A	hsa-miR-103a-3p	0.78891	NDRG3	hsa-miR-206	0.827989
ASH1L	hsa-miR-103a-3p	0.788524	GPD2	hsa-miR-206	0.827136
PHYHIPL	hsa-miR-103a-3p	0.787286	CORO1C	hsa-miR-206	0.826676
TMEM260	hsa-miR-103a-3p	0.787029	PHAX	hsa-miR-206	0.82591
BDNF	hsa-miR-103a-3p	0.786958	CNN3	hsa-miR-206	0.824718
NOVA1	hsa-miR-103a-3p	0.786698	CLTC	hsa-miR-206	0.823522
CLCN5	hsa-miR-103a-3p	0.786342	AP1G1	hsa-miR-206	0.818449
PLEKHA1	hsa-miR-103a-3p	0.785966	SPRED1	hsa-miR-206	0.814169
PPP6C	hsa-miR-103a-3p	0.785636	PDCD10	hsa-miR-206	0.813718
WASHC4	hsa-miR-103a-3p	0.78539	ABHD2	hsa-miR-206	0.813508
ANKIB1	hsa-miR-103a-3p	0.7844	MAB21L1	hsa-miR-206	0.812965
FOXP1	hsa-miR-103a-3p	0.783046	SNX2	hsa-miR-206	0.812235
ZCCHC2	hsa-miR-103a-3p	0.782748	SMIM14	hsa-miR-206	0.812195
YWHAH	hsa-miR-103a-3p	0.781734	EIF1AX	hsa-miR-206	0.811908
ATL2	hsa-miR-103a-3p	0.781669	FBXO33	hsa-miR-206	0.810551
TGFBR3	hsa-miR-103a-3p	0.781319	IGF1	hsa-miR-206	0.810112
LATS2	hsa-miR-103a-3p	0.77946	TWF1	hsa-miR-206	0.809782
EVA1A	hsa-miR-103a-3p	0.778875	C2orf69	hsa-miR-206	0.807753
SNX3	hsa-miR-103a-3p	0.778769	KIF2A	hsa-miR-206	0.805754
ZBTB39	hsa-miR-103a-3p	0.777132	TIMP3	hsa-miR-206	0.804898
ZBTB10	hsa-miR-103a-3p	0.776944	SRSF9	hsa-miR-206	0.803735
KDM7A	hsa-miR-103a-3p	0.7765	MET	hsa-miR-206	0.801776
RASSF5	hsa-miR-103a-3p	0.776321	TMEM243	hsa-miR-206	0.80153
FBXW7	hsa-miR-103a-3p	0.774864	KCNIP3	hsa-miR-206	0.800296
CDK14	hsa-miR-103a-3p	0.774255	HNRNPA3	hsa-miR-206	0.800282
SCN8A	hsa-miR-103a-3p	0.773515	TPM3	hsa-miR-206	0.795484
UPF2	hsa-miR-103a-3p	0.773275	SERP1	hsa-miR-206	0.795477
GALNT7	hsa-miR-103a-3p	0.773164	WDR48	hsa-miR-206	0.795241
CUL4A	hsa-miR-103a-3p	0.773135	SRSF1	hsa-miR-206	0.791604
N4BP1	hsa-miR-103a-3p	0.772528	THBS1	hsa-miR-206	0.789155
SCN1A	hsa-miR-103a-3p	0.771593	AZIN1	hsa-miR-206	0.788277
VPS4A	hsa-miR-103a-3p	0.771112	YWHAZ	hsa-miR-206	0.787991
MYBL1	hsa-miR-103a-3p	0.771047	MON2	hsa-miR-206	0.787898
PDE3B	hsa-miR-103a-3p	0.770744	GPR137C	hsa-miR-206	0.785946
TLE4	hsa-miR-103a-3p	0.770497	DDX5	hsa-miR-206	0.784946
SINHCAF	hsa-miR-103a-3p	0.769978	CAAP1	hsa-miR-206	0.784564
CHIC1	hsa-miR-103a-3p	0.769488	FOXP1	hsa-miR-206	0.784293
CASK	hsa-miR-103a-3p	0.769445	EIF4E	hsa-miR-206	0.78357
PRKG1	hsa-miR-103a-3p	0.768977	PAX3	hsa-miR-206	0.783312
NEDD9	hsa-miR-103a-3p	0.767738	MXD1	hsa-miR-206	0.780559
RPS6KA3	hsa-miR-103a-3p	0.76748	CHSY1	hsa-miR-206	0.779599
FBXO10	hsa-miR-103a-3p	0.766449	HS3ST3B1	hsa-miR-206	0.779275
SATB2	hsa-miR-103a-3p	0.766401	PDE7A	hsa-miR-206	0.779246
DYRK2	hsa-miR-103a-3p	0.766278	ARCN1	hsa-miR-206	0.778041
RAP2C	hsa-miR-103a-3p	0.766231	JARID2	hsa-miR-206	0.777878
CLOCK	hsa-miR-103a-3p	0.766205	POGK	hsa-miR-206	0.777415
TNPO1	hsa-miR-103a-3p	0.766154	MATR3	hsa-miR-206	0.776426
PAWR	hsa-miR-103a-3p	0.766094	MAP4K3	hsa-miR-206	0.776073
VAV3	hsa-miR-103a-3p	0.765315	FNDC3A	hsa-miR-206	0.775262
MBNL1	hsa-miR-103a-3p	0.763495	CLCN3	hsa-miR-206	0.775082
JAKMIP2	hsa-miR-103a-3p	0.763392	SLC39A10	hsa-miR-206	0.774852
CAPZA2	hsa-miR-103a-3p	0.76308	NCL	hsa-miR-206	0.773453
PPP6R2	hsa-miR-103a-3p	0.762682	G6PD	hsa-miR-206	0.773367
TBKBP1	hsa-miR-103a-3p	0.760095	STC2	hsa-miR-206	0.772583
NPAS2	hsa-miR-103a-3p	0.758123	HSP90B1	hsa-miR-206	0.771987
RAI14	hsa-miR-103a-3p	0.75811	CREBL2	hsa-miR-206	0.771395
HERC2	hsa-miR-103a-3p	0.755973	KMT2E	hsa-miR-206	0.771237
DLL1	hsa-miR-103a-3p	0.755418	KTN1	hsa-miR-206	0.770394
ARMC8	hsa-miR-103a-3p	0.755118	TMCC1	hsa-miR-206	0.770184
HELZ	hsa-miR-103a-3p	0.754023	SPATS2L	hsa-miR-206	0.768994
TSPAN5	hsa-miR-103a-3p	0.753853	ANKRD29	hsa-miR-206	0.767388
IARS1	hsa-miR-103a-3p	0.75366	PPIB	hsa-miR-206	0.767355
PLEKHF2	hsa-miR-103a-3p	0.752847	RAB5A	hsa-miR-206	0.767183
MYH9	hsa-miR-103a-3p	0.752586	GCH1	hsa-miR-206	0.766757
BCLAF3	hsa-miR-103a-3p	0.75253	NXT2	hsa-miR-206	0.765594
GPATCH8	hsa-miR-103a-3p	0.752265	DHX15	hsa-miR-206	0.764969
PNISR	hsa-miR-103a-3p	0.75192	ATP6V1A	hsa-miR-206	0.763548
SUSD6	hsa-miR-103a-3p	0.751081	UBE2H	hsa-miR-206	0.76256
ARHGAP5	hsa-miR-103a-3p	0.750676	MFSD14A	hsa-miR-206	0.760755
SIX4	hsa-miR-103a-3p	0.750512	TBC1D15	hsa-miR-206	0.759275
ZNF711	hsa-miR-103a-3p	0.750485	SLC25A30	hsa-miR-206	0.759214
PTPN4	hsa-miR-103a-3p	0.750142	SLC10A7	hsa-miR-206	0.75755
C2CD5	hsa-miR-103a-3p	0.749758	RARB	hsa-miR-206	0.757327
KIF5A	hsa-miR-103a-3p	0.748891	ANKIB1	hsa-miR-206	0.757309
MEF2D	hsa-miR-103a-3p	0.748764	LRCH1	hsa-miR-206	0.756587
RSPO3	hsa-miR-103a-3p	0.747263	YWHAQ	hsa-miR-206	0.754821
DNAJB4	hsa-miR-103a-3p	0.746937	MSANTD2	hsa-miR-206	0.751242
SLC35G1	hsa-miR-103a-3p	0.746176	MIPOL1	hsa-miR-206	0.751235
FLOT2	hsa-miR-103a-3p	0.744426	LCOR	hsa-miR-206	0.749698
ZNF654	hsa-miR-103a-3p	0.744265	ZNF281	hsa-miR-206	0.747239
SNCG	hsa-miR-103a-3p	0.744092	FNDC3B	hsa-miR-206	0.746714
LRP1B	hsa-miR-103a-3p	0.743952	HMGN1	hsa-miR-206	0.744825
YTHDC1	hsa-miR-103a-3p	0.743865	ANXA4	hsa-miR-206	0.744679
SLC20A2	hsa-miR-103a-3p	0.743529	RNF138	hsa-miR-206	0.743238
NAA15	hsa-miR-103a-3p	0.74281	AKAP11	hsa-miR-206	0.74279
TRIAP1	hsa-miR-103a-3p	0.742389	SULF1	hsa-miR-206	0.742715
SPATS2L	hsa-miR-103a-3p	0.741914	PDGFA	hsa-miR-206	0.739988
CEP85L	hsa-miR-103a-3p	0.741218	CCND2	hsa-miR-206	0.739968
ATXN7L1	hsa-miR-103a-3p	0.740978	HOXB4	hsa-miR-206	0.739746
FRYL	hsa-miR-103a-3p	0.740127	MEOX2	hsa-miR-206	0.739133
TLK1	hsa-miR-103a-3p	0.738874	PDIK1L	hsa-miR-206	0.738691
PPP4R3B	hsa-miR-103a-3p	0.737878	HSPD1	hsa-miR-206	0.736294
GABRG2	hsa-miR-103a-3p	0.737211	HDAC4	hsa-miR-206	0.736215
CHD6	hsa-miR-103a-3p	0.737011	VAMP4	hsa-miR-206	0.736215
DCP1A	hsa-miR-103a-3p	0.736945	TCF7L2	hsa-miR-206	0.735978
FGF2	hsa-miR-103a-3p	0.73539	LIN7C	hsa-miR-206	0.73477
MYB	hsa-miR-103a-3p	0.734459	RASA1	hsa-miR-206	0.732819
CSNK1A1	hsa-miR-103a-3p	0.733974	PICALM	hsa-miR-206	0.732812
DLG5	hsa-miR-103a-3p	0.733315	CITED2	hsa-miR-206	0.732616
SALL4	hsa-miR-103a-3p	0.732538	RSBN1	hsa-miR-206	0.730489
FAF2	hsa-miR-103a-3p	0.732377	SLC6A5	hsa-miR-206	0.730001
BTG2	hsa-miR-103a-3p	0.731154	TTC7B	hsa-miR-206	0.72984
CCDC6	hsa-miR-103a-3p	0.730494	RIT2	hsa-miR-206	0.728052
GIT2	hsa-miR-103a-3p	0.729851	ANXA2	hsa-miR-206	0.726816
BACH2	hsa-miR-103a-3p	0.729809	CBL	hsa-miR-206	0.726779
PIK3R1	hsa-miR-103a-3p	0.727731	RNF111	hsa-miR-206	0.726317
ZNF449	hsa-miR-103a-3p	0.7267	PTPRG	hsa-miR-206	0.725724
DCBLD2	hsa-miR-103a-3p	0.726068	FN1	hsa-miR-206	0.724894
CDK6	hsa-miR-103a-3p	0.725819	BAG4	hsa-miR-206	0.724819
LONRF1	hsa-miR-103a-3p	0.725678	ADPGK	hsa-miR-206	0.723803
PURB	hsa-miR-103a-3p	0.724665	ATG13	hsa-miR-206	0.723354
VCAN	hsa-miR-103a-3p	0.724533	CTTNBP2NL	hsa-miR-206	0.722789
SDCBP	hsa-miR-103a-3p	0.724292	ELOF1	hsa-miR-206	0.722696
MBNL2	hsa-miR-103a-3p	0.723738	FAM91A1	hsa-miR-206	0.721507
MTMR4	hsa-miR-103a-3p	0.723202	YPEL2	hsa-miR-206	0.721095
RAB11FIP2	hsa-miR-103a-3p	0.722965	KCNJ2	hsa-miR-206	0.72088
UBR3	hsa-miR-103a-3p	0.722887	LASP1	hsa-miR-206	0.720236
PNN	hsa-miR-103a-3p	0.722227	ZBTB4	hsa-miR-206	0.720208
BTLA	hsa-miR-103a-3p	0.721848	RSBN1L	hsa-miR-206	0.719011
PDE8B	hsa-miR-103a-3p	0.72165	ZFP36L2	hsa-miR-206	0.7188
LCOR	hsa-miR-103a-3p	0.721095	ACAP2	hsa-miR-206	0.718413
RUNX1T1	hsa-miR-103a-3p	0.720471	FUBP1	hsa-miR-206	0.717067
PRRT2	hsa-miR-103a-3p	0.720435	ZNF148	hsa-miR-206	0.717044
PPP2R3C	hsa-miR-103a-3p	0.719232	UNC119B	hsa-miR-206	0.716522
ARNT	hsa-miR-103a-3p	0.718198	ZNF800	hsa-miR-206	0.715393
CDK8	hsa-miR-103a-3p	0.71807	PRKCE	hsa-miR-206	0.712847
MFN2	hsa-miR-103a-3p	0.718005	EBPL	hsa-miR-206	0.712556
CC2D1B	hsa-miR-103a-3p	0.716822	DGKH	hsa-miR-206	0.711848
GRIN2A	hsa-miR-103a-3p	0.715366	ABCB7	hsa-miR-206	0.71177
NUDCD2	hsa-miR-103a-3p	0.714685	BSCL2	hsa-miR-206	0.711461
NR4A3	hsa-miR-103a-3p	0.714613	CERS2	hsa-miR-206	0.711397
USF3	hsa-miR-103a-3p	0.714036	WBP1L	hsa-miR-206	0.710575
ARHGAP12	hsa-miR-106a-5p	0.908565	NDFIP2	hsa-miR-206	0.70981
ZNFX1	hsa-miR-106a-5p	0.898659	CD2AP	hsa-miR-206	0.708836
BRMS1L	hsa-miR-106a-5p	0.896635	SEC62	hsa-miR-206	0.708834
DYNC1LI2	hsa-miR-106a-5p	0.896555	ARID2	hsa-miR-206	0.708721
PLEKHA3	hsa-miR-106a-5p	0.894038	FBXW7	hsa-miR-206	0.707384
MAP3K2	hsa-miR-106a-5p	0.891894	FRS2	hsa-miR-206	0.706715
RAB22A	hsa-miR-106a-5p	0.889107	ZFP36L1	hsa-miR-206	0.706068
EPHA4	hsa-miR-106a-5p	0.88403	SMARCB1	hsa-miR-206	0.705629
ZNF800	hsa-miR-106a-5p	0.877285	RRBP1	hsa-miR-206	0.705053
ENPP5	hsa-miR-106a-5p	0.877018	THAP12	hsa-miR-206	0.704995
PKD2	hsa-miR-106a-5p	0.874746	PALS1	hsa-miR-206	0.704792
ITPRIPL2	hsa-miR-106a-5p	0.871647	RICTOR	hsa-miR-206	0.703865
RRAGD	hsa-miR-106a-5p	0.869681	MBTD1	hsa-miR-206	0.70343
STAT3	hsa-miR-106a-5p	0.869306	MED1	hsa-miR-206	0.703232
MYT1L	hsa-miR-106a-5p	0.86902	GCLC	hsa-miR-206	0.702862
STK17B	hsa-miR-106a-5p	0.868742	BACH2	hsa-miR-206	0.702664
EZH1	hsa-miR-106a-5p	0.868291	TNPO1	hsa-miR-206	0.702098
FBXL5	hsa-miR-106a-5p	0.867879	ASH2L	hsa-miR-206	0.701944
GPR137C	hsa-miR-106a-5p	0.867067	CAPRIN1	hsa-miR-206	0.701228
VLDLR	hsa-miR-106a-5p	0.860262	NBEA	hsa-miR-206	0.700227
E2F5	hsa-miR-106a-5p	0.859972	MYLK	hsa-miR-206	0.700222
FCHO2	hsa-miR-106a-5p	0.859718	ARF3	hsa-miR-206	0.700204
ZBTB7A	hsa-miR-106a-5p	0.85962	USP33	hsa-miR-206	0.699671
PFN2	hsa-miR-106a-5p	0.859192	ANP32B	hsa-miR-206	0.699616
PRRG1	hsa-miR-106a-5p	0.856555	TNPO2	hsa-miR-206	0.699525
E2F1	hsa-miR-106a-5p	0.854789	EDN1	hsa-miR-206	0.699155
PTPN4	hsa-miR-106a-5p	0.854525	DCP2	hsa-miR-206	0.698327
MKRN1	hsa-miR-106a-5p	0.854139	UBE4A	hsa-miR-206	0.698161
ARID4B	hsa-miR-106a-5p	0.851939	BET1	hsa-miR-206	0.697707
BCL11B	hsa-miR-106a-5p	0.851685	SLC25A22	hsa-miR-206	0.697345
ARID4A	hsa-miR-106a-5p	0.84813	PHF6	hsa-miR-206	0.697338
TGFBR2	hsa-miR-106a-5p	0.847268	MAL2	hsa-miR-206	0.696862
ZFYVE26	hsa-miR-106a-5p	0.846965	GPR6	hsa-miR-206	0.696031
ZBTB4	hsa-miR-106a-5p	0.846806	SEC63	hsa-miR-206	0.695942
RPS6KA5	hsa-miR-106a-5p	0.846532	CPEB1	hsa-miR-206	0.695756
CFL2	hsa-miR-106a-5p	0.846247	SMARCC1	hsa-miR-206	0.694542
NABP1	hsa-miR-106a-5p	0.845877	MECOM	hsa-miR-206	0.694223
CROT	hsa-miR-106a-5p	0.843665	TMEM178A	hsa-miR-206	0.69399
SAR1B	hsa-miR-106a-5p	0.843296	SLC35B4	hsa-miR-206	0.693253
RUFY2	hsa-miR-106a-5p	0.842872	CASK	hsa-miR-206	0.692672
NPAS2	hsa-miR-106a-5p	0.842308	ETS1	hsa-miR-206	0.692064
CDC37L1	hsa-miR-106a-5p	0.841799	ZNF236	hsa-miR-206	0.691394
GLIS3	hsa-miR-106a-5p	0.841393	ARFIP1	hsa-miR-206	0.69074
FGD4	hsa-miR-106a-5p	0.841056	RYBP	hsa-miR-206	0.689133
FYCO1	hsa-miR-106a-5p	0.840086	HNRNPK	hsa-miR-206	0.688897
USP3	hsa-miR-106a-5p	0.838944	SEPTIN2	hsa-miR-206	0.688031
KLHL28	hsa-miR-106a-5p	0.838594	NUP50	hsa-miR-206	0.687676
SLC40A1	hsa-miR-106a-5p	0.838368	CD164	hsa-miR-206	0.687596
MED12L	hsa-miR-106a-5p	0.837719	SH3BGRL3	hsa-miR-206	0.687246
LAPTM4A	hsa-miR-106a-5p	0.837043	SNAI2	hsa-miR-206	0.686083
ATAD2	hsa-miR-106a-5p	0.836443	ADGRA3	hsa-miR-206	0.685473
TNFRSF21	hsa-miR-106a-5p	0.836341	TSPAN4	hsa-miR-206	0.685071
SACS	hsa-miR-106a-5p	0.834866	TPM4	hsa-miR-206	0.684851
SPOPL	hsa-miR-106a-5p	0.834555	XPO6	hsa-miR-206	0.684084
BTBD7	hsa-miR-106a-5p	0.834031	PLPPR4	hsa-miR-206	0.683858
RBL2	hsa-miR-106a-5p	0.833141	VEGFA	hsa-miR-206	0.683351
DDHD1	hsa-miR-106a-5p	0.833041	HACE1	hsa-miR-206	0.682676
CLIP4	hsa-miR-106a-5p	0.83238	ZFHX3	hsa-miR-206	0.682431
TRAPPC14	hsa-miR-106a-5p	0.832158	AP1S1	hsa-miR-206	0.681997
SERP1	hsa-miR-106a-5p	0.831806	KANK4	hsa-miR-206	0.680736
PBX3	hsa-miR-106a-5p	0.830574	TMSB4X	hsa-miR-206	0.680692
DERL2	hsa-miR-106a-5p	0.830058	FAM126A	hsa-miR-206	0.680116
MASTL	hsa-miR-106a-5p	0.828167	EFNB2	hsa-miR-206	0.679875
ANKIB1	hsa-miR-106a-5p	0.827696	CCSAP	hsa-miR-206	0.679708
ZNF367	hsa-miR-106a-5p	0.827005	TGFBR3	hsa-miR-206	0.679595
EMSY	hsa-miR-106a-5p	0.825822	ZNF280C	hsa-miR-206	0.678895
BMPR2	hsa-miR-106a-5p	0.82511	KAT6A	hsa-miR-206	0.678799
PFKP	hsa-miR-106a-5p	0.823799	PDCD4	hsa-miR-206	0.677663
ANKRD52	hsa-miR-106a-5p	0.823543	WDR1	hsa-miR-206	0.677212
RNF128	hsa-miR-106a-5p	0.82308	TPPP	hsa-miR-206	0.676878
CD69	hsa-miR-106a-5p	0.82286	C2CD5	hsa-miR-206	0.676279
EFCAB14	hsa-miR-106a-5p	0.821954	MINDY2	hsa-miR-206	0.675387
NUP35	hsa-miR-106a-5p	0.821706	PFN2	hsa-miR-206	0.67524
RGMA	hsa-miR-106a-5p	0.821185	PIK3C2A	hsa-miR-206	0.674522
RAB5B	hsa-miR-106a-5p	0.818629	ADGRB3	hsa-miR-142-5p	0.791459
LAMA3	hsa-miR-106a-5p	0.818349	ITGAV	hsa-miR-142-5p	0.764879
TSG101	hsa-miR-106a-5p	0.818201	PLEKHA3	hsa-miR-142-5p	0.763882
RSBN1	hsa-miR-106a-5p	0.817897	ZFPM2	hsa-miR-142-5p	0.762748
BTG3	hsa-miR-106a-5p	0.817826	RAP1A	hsa-miR-142-5p	0.760274
RASL11B	hsa-miR-106a-5p	0.817398	ATXN7L2	hsa-miR-142-5p	0.754172
ETV1	hsa-miR-106a-5p	0.817188	PRPF40A	hsa-miR-142-5p	0.750247
TMCC1	hsa-miR-106a-5p	0.817096	HERPUD1	hsa-miR-142-5p	0.744339
KIF23	hsa-miR-106a-5p	0.816751	CCNG2	hsa-miR-142-5p	0.742994
NR4A2	hsa-miR-106a-5p	0.816706	TMF1	hsa-miR-142-5p	0.741289
LIMA1	hsa-miR-106a-5p	0.815938	IGF2BP3	hsa-miR-142-5p	0.733264
HBP1	hsa-miR-106a-5p	0.815697	ATP1B1	hsa-miR-142-5p	0.729171
TMEM64	hsa-miR-106a-5p	0.813847	CNEP1R1	hsa-miR-142-5p	0.729004
SLITRK3	hsa-miR-106a-5p	0.813718	UBE2D1	hsa-miR-142-5p	0.727749
ITGB8	hsa-miR-106a-5p	0.813214	WWP1	hsa-miR-142-5p	0.726896
MAP3K9	hsa-miR-106a-5p	0.813136	NFE2L2	hsa-miR-142-5p	0.725484
FAM126B	hsa-miR-106a-5p	0.813118	CBLN4	hsa-miR-142-5p	0.723476
NEDD4L	hsa-miR-106a-5p	0.812987	GAS7	hsa-miR-142-5p	0.72321
NAA30	hsa-miR-106a-5p	0.812959	DIAPH2	hsa-miR-142-5p	0.720992
PPP6C	hsa-miR-106a-5p	0.812541	OTUD4	hsa-miR-142-5p	0.716138
ANKFY1	hsa-miR-106a-5p	0.812487	VPS54	hsa-miR-142-5p	0.715949
DCUN1D3	hsa-miR-106a-5p	0.812405	RPS6KA5	hsa-miR-142-5p	0.711819
RSRP1	hsa-miR-106a-5p	0.811666	CDK17	hsa-miR-142-5p	0.70987
FNBP1L	hsa-miR-106a-5p	0.811266	TVP23B	hsa-miR-142-5p	0.707397
GPR6	hsa-miR-106a-5p	0.811189	RHOT1	hsa-miR-142-5p	0.705465
UBE2W	hsa-miR-106a-5p	0.810488	HNRNPH3	hsa-miR-142-5p	0.703011
LHX6	hsa-miR-106a-5p	0.810384	CUL2	hsa-miR-142-5p	0.702491
ZNF704	hsa-miR-106a-5p	0.809517	TRIM36	hsa-miR-142-5p	0.702195
POLR3G	hsa-miR-106a-5p	0.808949	CCNT2	hsa-miR-142-5p	0.702137
NR4A3	hsa-miR-106a-5p	0.807549	BOD1L1	hsa-miR-142-5p	0.698849
RGMB	hsa-miR-106a-5p	0.805255	ROBO1	hsa-miR-142-5p	0.698062
REEP3	hsa-miR-106a-5p	0.80487	VMP1	hsa-miR-142-5p	0.697257
ZNF512B	hsa-miR-106a-5p	0.804735	SGCE	hsa-miR-142-5p	0.696111
DOCK4	hsa-miR-106a-5p	0.803667	MED14	hsa-miR-142-5p	0.694075
TRIP10	hsa-miR-106a-5p	0.803419	PRPF4B	hsa-miR-142-5p	0.691837
APCDD1	hsa-miR-106a-5p	0.803407	AFF4	hsa-miR-142-5p	0.691641
F3	hsa-miR-106a-5p	0.80298	DDHD1	hsa-miR-142-5p	0.690921
OXR1	hsa-miR-106a-5p	0.802705	HIPK1	hsa-miR-142-5p	0.689938
FJX1	hsa-miR-106a-5p	0.802499	LMX1A	hsa-miR-142-5p	0.686485
BMT2	hsa-miR-106a-5p	0.802159	QKI	hsa-miR-142-5p	0.68282
PDCD1LG2	hsa-miR-106a-5p	0.802131	LEPROT	hsa-miR-142-5p	0.682614
PTHLH	hsa-miR-106a-5p	0.801786	MAGI2	hsa-miR-142-5p	0.675471
INTS6	hsa-miR-106a-5p	0.801578	RCN2	hsa-miR-142-5p	0.674096
VASH2	hsa-miR-106a-5p	0.801163	ANKIB1	hsa-miR-142-5p	0.674068
TBC1D20	hsa-miR-106a-5p	0.800977	FEM1C	hsa-miR-142-5p	0.673792
RHOC	hsa-miR-106a-5p	0.800861	LDB2	hsa-miR-142-5p	0.673099
EPHA7	hsa-miR-106a-5p	0.800751	ALS2	hsa-miR-142-5p	0.670642
CAPRIN2	hsa-miR-106a-5p	0.800659	ARSJ	hsa-miR-142-5p	0.667755
XRN1	hsa-miR-106a-5p	0.800455	SETD2	hsa-miR-142-5p	0.667493
MINK1	hsa-miR-106a-5p	0.79996	MRPS36	hsa-miR-142-5p	0.667051
METAP1	hsa-miR-106a-5p	0.799623	ACTN4	hsa-miR-142-5p	0.666576
DPYSL5	hsa-miR-106a-5p	0.799179	MED12L	hsa-miR-142-5p	0.665778
USP46	hsa-miR-106a-5p	0.799144	CAMSAP2	hsa-miR-142-5p	0.665639
PTPDC1	hsa-miR-106a-5p	0.798831	TUT4	hsa-miR-142-5p	0.664614
NBEA	hsa-miR-106a-5p	0.798823	FIGN	hsa-miR-142-5p	0.66412
TXNIP	hsa-miR-106a-5p	0.798711	EFCAB14	hsa-miR-142-5p	0.663806
CRIM1	hsa-miR-106a-5p	0.798436	PTPN4	hsa-miR-142-5p	0.66367
BAMBI	hsa-miR-106a-5p	0.798341	FAM91A1	hsa-miR-142-5p	0.663287
TNKS2	hsa-miR-106a-5p	0.798155	MARCHF6	hsa-miR-142-5p	0.662368
NTN4	hsa-miR-106a-5p	0.798029	PTEN	hsa-miR-142-5p	0.662366
GOSR1	hsa-miR-106a-5p	0.797863	RHOA	hsa-miR-142-5p	0.658499
GUCY1A1	hsa-miR-106a-5p	0.797404	BTBD7	hsa-miR-142-5p	0.658025
EREG	hsa-miR-106a-5p	0.796969	PRDM8	hsa-miR-142-5p	0.657653
PPP1R21	hsa-miR-106a-5p	0.796692	EMC4	hsa-miR-142-5p	0.657634
BNIP2	hsa-miR-106a-5p	0.796463	RNF128	hsa-miR-142-5p	0.657619
FRMD6	hsa-miR-106a-5p	0.795734	KITLG	hsa-miR-142-5p	0.654908
ZBTB18	hsa-miR-106a-5p	0.795331	REV3L	hsa-miR-142-5p	0.652859
CALD1	hsa-miR-106a-5p	0.794548	RERG	hsa-miR-142-5p	0.651964
GNS	hsa-miR-106a-5p	0.794501	SACS	hsa-miR-142-5p	0.650026
EIF5A2	hsa-miR-106a-5p	0.794225	ZFX	hsa-miR-142-5p	0.649998
DENND5B	hsa-miR-106a-5p	0.794203	CBX3	hsa-miR-142-5p	0.64977
WDR37	hsa-miR-106a-5p	0.794184	NEDD4L	hsa-miR-142-5p	0.648977
TWF1	hsa-miR-106a-5p	0.794179	SOX5	hsa-miR-142-5p	0.647834
GAB1	hsa-miR-106a-5p	0.793743	RORA	hsa-miR-142-5p	0.647687
SLC17A7	hsa-miR-106a-5p	0.793679	MTMR10	hsa-miR-142-5p	0.646599
EGLN3	hsa-miR-106a-5p	0.793583	ZCCHC14	hsa-miR-142-5p	0.646573
CCNG2	hsa-miR-106a-5p	0.793125	CPEB2	hsa-miR-142-5p	0.644824
SOBP	hsa-miR-106a-5p	0.792783	LRP12	hsa-miR-142-5p	0.644427
RAP2C	hsa-miR-106a-5p	0.792643	MED28	hsa-miR-142-5p	0.644026
PEX5L	hsa-miR-106a-5p	0.791863	BVES	hsa-miR-142-5p	0.643862
YPEL2	hsa-miR-106a-5p	0.791814	UHMK1	hsa-miR-142-5p	0.643796
ZC3H12C	hsa-miR-106a-5p	0.791125	NFAT5	hsa-miR-142-5p	0.641983
VSX1	hsa-miR-106a-5p	0.79109	RHOQ	hsa-miR-142-5p	0.641947
CEP97	hsa-miR-106a-5p	0.789914	DNAJC7	hsa-miR-142-5p	0.640811
LDLR	hsa-miR-106a-5p	0.789844	TCF12	hsa-miR-142-5p	0.639304
ATG16L1	hsa-miR-106a-5p	0.78941	LRP1B	hsa-miR-142-5p	0.638787
BTBD10	hsa-miR-106a-5p	0.78894	ARHGEF12	hsa-miR-142-5p	0.637102
ANKRD50	hsa-miR-106a-5p	0.78867	NPAT	hsa-miR-142-5p	0.634061
PPP3R1	hsa-miR-106a-5p	0.78808	RNH1	hsa-miR-142-5p	0.633916
BCL2L11	hsa-miR-106a-5p	0.787932	SOCS1	hsa-miR-142-5p	0.633678
KLHL2	hsa-miR-106a-5p	0.787794	HOXD8	hsa-miR-142-5p	0.633422
KMT2B	hsa-miR-106a-5p	0.787571	STK38L	hsa-miR-142-5p	0.631515
CNOT7	hsa-miR-106a-5p	0.787391	MYF5	hsa-miR-142-5p	0.630919
NF1	hsa-miR-107	0.888848	NRG1	hsa-miR-142-5p	0.630906
ZHX1	hsa-miR-107	0.883297	EPAS1	hsa-miR-142-5p	0.630622
ANO3	hsa-miR-107	0.882211	PCGF3	hsa-miR-142-5p	0.62819
MED26	hsa-miR-107	0.880287	HSD11B1	hsa-miR-142-5p	0.628065
AGFG1	hsa-miR-107	0.879082	CHD9	hsa-miR-142-5p	0.627769
SNRK	hsa-miR-107	0.876337	ATP13A3	hsa-miR-142-5p	0.625492
AXIN2	hsa-miR-107	0.871865	LUZP2	hsa-miR-142-5p	0.624163
AGO4	hsa-miR-107	0.854421	SGMS1	hsa-miR-142-5p	0.623234
ARMC1	hsa-miR-107	0.854068	AHR	hsa-miR-142-5p	0.623226
NDEL1	hsa-miR-107	0.84298	TANC1	hsa-miR-142-5p	0.622586
DICER1	hsa-miR-107	0.838333	NR2C1	hsa-miR-142-5p	0.622006
CPEB3	hsa-miR-107	0.837834	PTP4A1	hsa-miR-142-5p	0.621617
RNF38	hsa-miR-107	0.836143	CPSF6	hsa-miR-142-5p	0.621393
NPAS3	hsa-miR-107	0.834457	MASTL	hsa-miR-142-5p	0.620725
CHD1	hsa-miR-107	0.825983	ELAVL2	hsa-miR-142-5p	0.619351
PHF20	hsa-miR-107	0.824206	SPTBN1	hsa-miR-142-5p	0.61859
RAB10	hsa-miR-107	0.823181	TAFA1	hsa-miR-142-5p	0.617832
TWF1	hsa-miR-107	0.821085	RNF138	hsa-miR-142-5p	0.61634
KIF23	hsa-miR-107	0.820328	FAM199X	hsa-miR-142-5p	0.616285
AQP11	hsa-miR-107	0.81937	BTG3	hsa-miR-142-5p	0.616121
TMEM47	hsa-miR-107	0.819159	BTBD1	hsa-miR-142-5p	0.614579
ATP13A3	hsa-miR-107	0.817025	CDC37L1	hsa-miR-142-5p	0.614219
ZNRF2	hsa-miR-107	0.816388	LHX8	hsa-miR-142-5p	0.613985
ASH1L	hsa-miR-107	0.815914	SLC24A2	hsa-miR-142-5p	0.613578
GSKIP	hsa-miR-107	0.81494	TCF21	hsa-miR-142-5p	0.613313
AFF4	hsa-miR-107	0.814673	SPAG9	hsa-miR-142-5p	0.613263
GPCPD1	hsa-miR-107	0.81259	TSC22D2	hsa-miR-142-5p	0.612496
RYBP	hsa-miR-107	0.810216	CIT	hsa-miR-142-5p	0.611498
ACVR2B	hsa-miR-107	0.809853	FBXO30	hsa-miR-142-5p	0.61099
PPP6C	hsa-miR-107	0.809633	SYNJ1	hsa-miR-142-5p	0.610988
JAKMIP2	hsa-miR-107	0.808765	STAG1	hsa-miR-142-5p	0.609919
GPC6	hsa-miR-107	0.807788	CUL4A	hsa-miR-142-5p	0.609761
EIF5	hsa-miR-107	0.807628	ZC3H12C	hsa-miR-142-5p	0.60961
CACNA2D1	hsa-miR-107	0.806465	FBXL3	hsa-miR-142-5p	0.609339
AGO1	hsa-miR-107	0.806308	KLF10	hsa-miR-142-5p	0.609191
RBM24	hsa-miR-107	0.803656	BAZ2A	hsa-miR-142-5p	0.60876
AMMECR1	hsa-miR-107	0.801652	SREBF1	hsa-miR-142-5p	0.607979
CAPZA2	hsa-miR-107	0.801638	FCHO2	hsa-miR-142-5p	0.607834
NEDD9	hsa-miR-107	0.801451	APBB3	hsa-miR-142-5p	0.607136
CAB39	hsa-miR-107	0.799756	SLAIN1	hsa-miR-142-5p	0.606767
N4BP1	hsa-miR-107	0.798735	RSF1	hsa-miR-142-5p	0.606547
PPIP5K2	hsa-miR-107	0.798426	UCHL3	hsa-miR-142-5p	0.606091
SUN2	hsa-miR-107	0.798255	MYCN	hsa-miR-142-5p	0.60489
NFIA	hsa-miR-107	0.797983	NEXMIF	hsa-miR-142-5p	0.604642
DYRK2	hsa-miR-107	0.796419	CD69	hsa-miR-142-5p	0.604547
CHD2	hsa-miR-107	0.795649	MRTFB	hsa-miR-142-5p	0.603917
OTUD4	hsa-miR-107	0.795251	LPP	hsa-miR-142-5p	0.603327
RCAN1	hsa-miR-107	0.793934	ACTC1	hsa-miR-142-5p	0.603192
FERMT2	hsa-miR-107	0.792832	PAIP1	hsa-miR-142-5p	0.602247
PRKCE	hsa-miR-107	0.792098	STC1	hsa-miR-142-5p	0.601605
MBNL1	hsa-miR-107	0.792025	NALF1	hsa-miR-142-5p	0.601541
VPS4A	hsa-miR-107	0.789947	EIF4E3	hsa-miR-142-5p	0.601527
SCN2A	hsa-miR-107	0.789275	ZBTB43	hsa-miR-142-5p	0.60107
ATL2	hsa-miR-107	0.788626	PUM2	hsa-miR-142-5p	0.600641
USP42	hsa-miR-107	0.78816	CASC3	hsa-miR-128-3p	0.858722
PDCD10	hsa-miR-107	0.786691	AFF4	hsa-miR-128-3p	0.848769
SDCBP	hsa-miR-107	0.786405	DCUN1D4	hsa-miR-128-3p	0.848149
BDNF	hsa-miR-107	0.786182	RYBP	hsa-miR-128-3p	0.845492
KIF21A	hsa-miR-107	0.785658	SS18	hsa-miR-128-3p	0.841408
TMEM260	hsa-miR-107	0.785577	H3-3B	hsa-miR-128-3p	0.836932
FOXP1	hsa-miR-107	0.785544	MIPOL1	hsa-miR-128-3p	0.834785
ZFPM2	hsa-miR-107	0.785056	RPS6KA5	hsa-miR-128-3p	0.832218
TBKBP1	hsa-miR-107	0.784223	FAM184A	hsa-miR-128-3p	0.831037
LATS2	hsa-miR-107	0.780871	PHF6	hsa-miR-128-3p	0.830724
SNX3	hsa-miR-107	0.780457	UBE2E2	hsa-miR-128-3p	0.827986
PLEKHA1	hsa-miR-107	0.779856	UBE2N	hsa-miR-128-3p	0.820035
PRKG1	hsa-miR-107	0.778802	BAZ2B	hsa-miR-128-3p	0.814825
HACD2	hsa-miR-107	0.778085	PRKX	hsa-miR-128-3p	0.814146
GABRG2	hsa-miR-107	0.778031	TMTC2	hsa-miR-128-3p	0.813488
PHYHIPL	hsa-miR-107	0.777433	VEGFC	hsa-miR-128-3p	0.811904
MYBL1	hsa-miR-107	0.776822	ISL1	hsa-miR-128-3p	0.809727
EVA1A	hsa-miR-107	0.776005	TMX1	hsa-miR-128-3p	0.809332
WASHC4	hsa-miR-107	0.775821	BEND4	hsa-miR-128-3p	0.807539
UPF2	hsa-miR-107	0.775575	SEC22A	hsa-miR-128-3p	0.807121
ANKIB1	hsa-miR-107	0.775574	RAP1B	hsa-miR-128-3p	0.806002
RPS6KA3	hsa-miR-107	0.77554	RNF38	hsa-miR-128-3p	0.805446
ZBTB10	hsa-miR-107	0.774462	SGMS1	hsa-miR-128-3p	0.803183
SCN8A	hsa-miR-107	0.773991	KCNK10	hsa-miR-128-3p	0.801008
CLOCK	hsa-miR-107	0.773757	PAIP2	hsa-miR-128-3p	0.797628
SPATS2L	hsa-miR-107	0.773584	GPAM	hsa-miR-128-3p	0.796298
YWHAH	hsa-miR-107	0.773574	POGLUT1	hsa-miR-128-3p	0.796021
CHIC1	hsa-miR-107	0.773298	TNPO1	hsa-miR-128-3p	0.794648
FGF2	hsa-miR-107	0.773222	POGZ	hsa-miR-128-3p	0.792612
NOVA1	hsa-miR-107	0.770692	ONECUT2	hsa-miR-128-3p	0.792462
GALNT7	hsa-miR-107	0.768551	YWHAB	hsa-miR-128-3p	0.790453
SCN1A	hsa-miR-107	0.768331	SEC61A1	hsa-miR-128-3p	0.789995
RASSF5	hsa-miR-107	0.768051	SEC24A	hsa-miR-128-3p	0.789442
CDK14	hsa-miR-107	0.767768	PHB	hsa-miR-128-3p	0.789337
PDE3B	hsa-miR-107	0.767594	RND3	hsa-miR-128-3p	0.788636
DNAJB4	hsa-miR-107	0.76753	SP1	hsa-miR-128-3p	0.788135
RIMS3	hsa-miR-107	0.765258	SOCS5	hsa-miR-128-3p	0.787458
TNPO1	hsa-miR-107	0.765214	MOSMO	hsa-miR-128-3p	0.785942
ZMYM2	hsa-miR-107	0.765004	NREP	hsa-miR-128-3p	0.785895
PAWR	hsa-miR-107	0.764103	NHS	hsa-miR-128-3p	0.784378
KDM7A	hsa-miR-107	0.764055	ARRDC4	hsa-miR-128-3p	0.784376
SATB2	hsa-miR-107	0.764003	SMAP1	hsa-miR-128-3p	0.781507
PPP6R2	hsa-miR-107	0.763291	CABLES2	hsa-miR-128-3p	0.780918
RAP2C	hsa-miR-107	0.763175	VANGL1	hsa-miR-128-3p	0.780577
NUDCD2	hsa-miR-107	0.762663	BMI1	hsa-miR-128-3p	0.77941
TLE4	hsa-miR-107	0.762228	CSF1	hsa-miR-128-3p	0.778757
FBXO10	hsa-miR-107	0.758951	GATA6	hsa-miR-128-3p	0.776746
PTPN4	hsa-miR-107	0.758473	PRKD1	hsa-miR-128-3p	0.776601
HELZ	hsa-miR-107	0.7582	JAG1	hsa-miR-128-3p	0.774526
FBXW7	hsa-miR-107	0.757634	CA10	hsa-miR-128-3p	0.774321
RUNX1T1	hsa-miR-107	0.757041	IRS1	hsa-miR-128-3p	0.773953
ARMC8	hsa-miR-107	0.755606	KCNK2	hsa-miR-128-3p	0.773448
VAV3	hsa-miR-107	0.754975	SLC35F3	hsa-miR-128-3p	0.772911
ZCCHC2	hsa-miR-107	0.75472	EML1	hsa-miR-128-3p	0.770922
SUSD6	hsa-miR-107	0.7545	CDIP1	hsa-miR-128-3p	0.768518
CLCN5	hsa-miR-107	0.753026	UBR5	hsa-miR-128-3p	0.767931
BCLAF3	hsa-miR-107	0.75263	SETD7	hsa-miR-128-3p	0.76747
TLK1	hsa-miR-107	0.752071	GREM1	hsa-miR-128-3p	0.767407
RNF125	hsa-miR-107	0.751349	NEK2	hsa-miR-128-3p	0.766553
RAB11FIP2	hsa-miR-107	0.751098	RNF144A	hsa-miR-128-3p	0.764981
RAI14	hsa-miR-107	0.750191	LRATD2	hsa-miR-128-3p	0.764744
HERC2	hsa-miR-107	0.749949	PLK2	hsa-miR-128-3p	0.764303
NPAS2	hsa-miR-107	0.748595	PPP1CC	hsa-miR-128-3p	0.764189
C2CD5	hsa-miR-107	0.748268	EFR3A	hsa-miR-128-3p	0.764113
TSPAN5	hsa-miR-107	0.747722	PDHX	hsa-miR-128-3p	0.763794
MEF2D	hsa-miR-107	0.74699	KDM7A	hsa-miR-128-3p	0.763703
DLL1	hsa-miR-107	0.74692	UBR1	hsa-miR-128-3p	0.762872
DCUN1D4	hsa-miR-107	0.745636	ARHGAP12	hsa-miR-128-3p	0.762796
ZNF711	hsa-miR-107	0.745572	PLAGL1	hsa-miR-128-3p	0.762254
COBLL1	hsa-miR-107	0.745276	RCOR3	hsa-miR-128-3p	0.761354
ARHGAP5	hsa-miR-107	0.745255	SZRD1	hsa-miR-128-3p	0.760292
SNCG	hsa-miR-107	0.745182	H3-5	hsa-miR-128-3p	0.759779
PLEKHF2	hsa-miR-107	0.744487	PDE7B	hsa-miR-128-3p	0.759035
MYH9	hsa-miR-107	0.744435	TCEANC2	hsa-miR-128-3p	0.757465
BACH2	hsa-miR-107	0.740504	SLC6A1	hsa-miR-128-3p	0.756656
SIX4	hsa-miR-107	0.740488	PAX9	hsa-miR-128-3p	0.756345
MTMR4	hsa-miR-107	0.740155	SOCS6	hsa-miR-128-3p	0.756018
PNISR	hsa-miR-107	0.739498	TTC39A	hsa-miR-128-3p	0.755582
IARS1	hsa-miR-107	0.738418	RETREG3	hsa-miR-128-3p	0.755283
RSPO3	hsa-miR-107	0.738038	ARMC8	hsa-miR-128-3p	0.755229
SLC35G1	hsa-miR-107	0.737953	OTULIN	hsa-miR-128-3p	0.754952
DCP1A	hsa-miR-107	0.737787	RNGTT	hsa-miR-128-3p	0.754554
CHD6	hsa-miR-107	0.737605	CORO1C	hsa-miR-128-3p	0.754091
FLOT2	hsa-miR-107	0.737402	SH3RF1	hsa-miR-128-3p	0.75297
LRP1B	hsa-miR-107	0.735251	NXT2	hsa-miR-128-3p	0.752879
NAA15	hsa-miR-107	0.735057	STIM2	hsa-miR-128-3p	0.751858
KIF5A	hsa-miR-107	0.735002	HOXA9	hsa-miR-128-3p	0.751188
ATXN7L1	hsa-miR-107	0.733791	SMAD2	hsa-miR-128-3p	0.750636
TNRC6B	hsa-miR-107	0.733593	TBC1D9B	hsa-miR-128-3p	0.748773
SALL1	hsa-miR-107	0.733474	NAA50	hsa-miR-128-3p	0.748651
FAF2	hsa-miR-107	0.73318	UBE2W	hsa-miR-128-3p	0.74795
SH3GL2	hsa-miR-107	0.732569	NOVA1	hsa-miR-128-3p	0.7473
ZNF654	hsa-miR-107	0.732538	TMEM167A	hsa-miR-128-3p	0.747063
CCDC6	hsa-miR-107	0.731343	SREK1	hsa-miR-128-3p	0.746314
PURB	hsa-miR-107	0.731118	WNK1	hsa-miR-128-3p	0.745183
CELSR2	hsa-miR-107	0.730575	CLPP	hsa-miR-128-3p	0.744145
HMGA2	hsa-miR-107	0.730564	IGLON5	hsa-miR-128-3p	0.741007
CASK	hsa-miR-107	0.730332	TEAD1	hsa-miR-128-3p	0.740174
CDK6	hsa-miR-107	0.730095	XPR1	hsa-miR-128-3p	0.739663
SOWAHC	hsa-miR-107	0.729353	WEE1	hsa-miR-128-3p	0.738588
BTG2	hsa-miR-107	0.727492	PDE3A	hsa-miR-128-3p	0.738437
PPP4R3B	hsa-miR-107	0.726926	SYT1	hsa-miR-128-3p	0.738301
PIK3R1	hsa-miR-107	0.726731	CCNT2	hsa-miR-128-3p	0.738263
SALL4	hsa-miR-107	0.725997	ATP8A1	hsa-miR-128-3p	0.737848
GIT2	hsa-miR-107	0.72563	NGFR	hsa-miR-128-3p	0.735687
GPATCH8	hsa-miR-107	0.725317	BAG2	hsa-miR-128-3p	0.734982
USF3	hsa-miR-107	0.724862	DCX	hsa-miR-128-3p	0.734942
MYB	hsa-miR-107	0.723892	SPTY2D1	hsa-miR-128-3p	0.734521
ZBTB39	hsa-miR-107	0.723724	SMARCA2	hsa-miR-128-3p	0.734308
OGT	hsa-miR-107	0.723148	MED13	hsa-miR-128-3p	0.733916
PCGF5	hsa-miR-107	0.720008	LBH	hsa-miR-128-3p	0.733854
VCAN	hsa-miR-107	0.719754	ZNF652	hsa-miR-128-3p	0.733312
CSNK1A1	hsa-miR-107	0.719532	DCP1A	hsa-miR-128-3p	0.732916
PPP2R3C	hsa-miR-107	0.718631	SMURF2	hsa-miR-128-3p	0.732466
ETNK1	hsa-miR-107	0.718285	NAA15	hsa-miR-128-3p	0.731671
CNOT6L	hsa-miR-107	0.717958	MET	hsa-miR-128-3p	0.730975
TGFBR3	hsa-miR-107	0.717666	RERE	hsa-miR-128-3p	0.730635
COPS2	hsa-miR-107	0.716959	SH2D3C	hsa-miR-128-3p	0.729332
LCOR	hsa-miR-107	0.716949	PDIA5	hsa-miR-128-3p	0.729302
DCBLD2	hsa-miR-107	0.71642	MEGF11	hsa-miR-128-3p	0.72889
MFN2	hsa-miR-107	0.715521	RET	hsa-miR-128-3p	0.728431
PDK4	hsa-miR-107	0.715208	AKIRIN1	hsa-miR-128-3p	0.728224
CUL4A	hsa-miR-107	0.714904	RCAN2	hsa-miR-128-3p	0.727708
CDK8	hsa-miR-107	0.71439	MINPP1	hsa-miR-128-3p	0.726644
SLC20A2	hsa-miR-107	0.714316	FRYL	hsa-miR-128-3p	0.726453
AMOT	hsa-miR-107	0.714092	TSTD2	hsa-miR-128-3p	0.726416
KRAS	hsa-miR-143-3p	0.854041	TMEFF1	hsa-miR-128-3p	0.725337
ITM2B	hsa-miR-143-3p	0.849566	BTG2	hsa-miR-128-3p	0.724134
MSI2	hsa-miR-143-3p	0.844046	STK35	hsa-miR-128-3p	0.723923
VAPB	hsa-miR-143-3p	0.816678	FOXQ1	hsa-miR-128-3p	0.723329
LMO4	hsa-miR-143-3p	0.809844	AK2	hsa-miR-128-3p	0.722032
GIGYF2	hsa-miR-143-3p	0.807721	SH3BGRL2	hsa-miR-128-3p	0.721989
ATP6V1A	hsa-miR-143-3p	0.804343	PDE10A	hsa-miR-128-3p	0.721606
AHCYL1	hsa-miR-143-3p	0.786662	MOB1B	hsa-miR-128-3p	0.720001
NECAP1	hsa-miR-143-3p	0.783797	AMMECR1L	hsa-miR-128-3p	0.719303
TARDBP	hsa-miR-143-3p	0.779021	FBXW7	hsa-miR-128-3p	0.718268
HK2	hsa-miR-143-3p	0.77637	RGL2	hsa-miR-128-3p	0.718157
VASH1	hsa-miR-143-3p	0.77503	MNT	hsa-miR-128-3p	0.717225
TSC22D3	hsa-miR-143-3p	0.774804	HOXA13	hsa-miR-128-3p	0.715795
ABL2	hsa-miR-143-3p	0.771387	NRBF2	hsa-miR-128-3p	0.714671
IGFBP5	hsa-miR-143-3p	0.771384	DCAF7	hsa-miR-128-3p	0.714412
TET1	hsa-miR-143-3p	0.770141	STK24	hsa-miR-128-3p	0.714226
PAN3	hsa-miR-143-3p	0.769877	MSL1	hsa-miR-128-3p	0.713832
DIP2B	hsa-miR-143-3p	0.768775	TGFBR1	hsa-miR-128-3p	0.713671
GXYLT1	hsa-miR-143-3p	0.768488	ECE1	hsa-miR-128-3p	0.712932
RBM24	hsa-miR-143-3p	0.767702	AK4	hsa-miR-128-3p	0.711738
PCMT1	hsa-miR-143-3p	0.761646	ZFHX3	hsa-miR-128-3p	0.711056
PHF6	hsa-miR-143-3p	0.759295	RELN	hsa-miR-128-3p	0.710999
ADD3	hsa-miR-143-3p	0.751694	NAV2	hsa-miR-128-3p	0.710929
SRSF11	hsa-miR-143-3p	0.751477	GTF2A2	hsa-miR-128-3p	0.710924
ITGA6	hsa-miR-143-3p	0.751079	CTDSP2	hsa-miR-128-3p	0.710714
SIX4	hsa-miR-143-3p	0.750479	FAM126A	hsa-miR-128-3p	0.710146
CREBZF	hsa-miR-143-3p	0.749686	RPS6KB1	hsa-miR-128-3p	0.709462
CBFB	hsa-miR-143-3p	0.749579	NEUROD6	hsa-miR-128-3p	0.70885
UBXN2B	hsa-miR-143-3p	0.748965	ACVR2A	hsa-miR-128-3p	0.708272
CRELD1	hsa-miR-143-3p	0.748493	MIEF1	hsa-miR-128-3p	0.707672
UBE2E3	hsa-miR-143-3p	0.746826	EYA4	hsa-miR-128-3p	0.707355
LARP4	hsa-miR-143-3p	0.746575	UNC13C	hsa-miR-128-3p	0.705378
ZBTB44	hsa-miR-143-3p	0.745402	CNR1	hsa-miR-128-3p	0.705352
MAP3K7	hsa-miR-143-3p	0.744532	ZFP36L1	hsa-miR-128-3p	0.704967
SLC38A2	hsa-miR-143-3p	0.739584	RNF182	hsa-miR-128-3p	0.704605
GLI3	hsa-miR-143-3p	0.736374	MPPED2	hsa-miR-128-3p	0.704178
OTUD4	hsa-miR-143-3p	0.734818	KMT2A	hsa-miR-128-3p	0.704
PRKCE	hsa-miR-143-3p	0.734412	TMEM25	hsa-miR-128-3p	0.703477
BRD2	hsa-miR-143-3p	0.73312	PIK3R1	hsa-miR-128-3p	0.703255
SECISBP2L	hsa-miR-143-3p	0.730413	ADAMTS5	hsa-miR-128-3p	0.702727
MYO6	hsa-miR-143-3p	0.729897	TUB	hsa-miR-128-3p	0.702655
ATG2B	hsa-miR-143-3p	0.728811	SOS1	hsa-miR-128-3p	0.702373
TRAPPC8	hsa-miR-143-3p	0.72683	HMGB3	hsa-miR-128-3p	0.70129
SLC16A2	hsa-miR-143-3p	0.725375	MAPK6	hsa-miR-128-3p	0.701277
SMNDC1	hsa-miR-143-3p	0.724251	PTPRB	hsa-miR-128-3p	0.701091
PC	hsa-miR-143-3p	0.72375	FUBP3	hsa-miR-128-3p	0.700363
NPR3	hsa-miR-143-3p	0.721204	NOL4L	hsa-miR-122-5p	0.791349
PTPN4	hsa-miR-143-3p	0.720196	NPEPPS	hsa-miR-122-5p	0.788305
QKI	hsa-miR-143-3p	0.716934	CTDNEP1	hsa-miR-122-5p	0.786732
SLC25A15	hsa-miR-143-3p	0.716326	CLIC4	hsa-miR-122-5p	0.78209
PTBP3	hsa-miR-143-3p	0.716068	HNRNPU	hsa-miR-122-5p	0.78186
TTPA	hsa-miR-143-3p	0.710851	FOXP2	hsa-miR-122-5p	0.77185
PSME4	hsa-miR-143-3p	0.710392	ZNF827	hsa-miR-122-5p	0.765345
AFF1	hsa-miR-143-3p	0.709929	CCAR1	hsa-miR-122-5p	0.756593
UBE2E1	hsa-miR-143-3p	0.704947	NFAT5	hsa-miR-122-5p	0.756391
EPM2AIP1	hsa-miR-143-3p	0.704262	ALDOA	hsa-miR-122-5p	0.755284
KLF12	hsa-miR-143-3p	0.703585	CS	hsa-miR-122-5p	0.74295
RSRC2	hsa-miR-143-3p	0.703089	P4HA1	hsa-miR-122-5p	0.74289
NUAK2	hsa-miR-143-3p	0.702715	CCNG1	hsa-miR-122-5p	0.732714
SOBP	hsa-miR-143-3p	0.698252	ADGRB2	hsa-miR-122-5p	0.731921
ATL2	hsa-miR-143-3p	0.693899	NICN1	hsa-miR-122-5p	0.730397
SLC30A8	hsa-miR-143-3p	0.693504	MIPOL1	hsa-miR-122-5p	0.727283
HIPK2	hsa-miR-143-3p	0.69333	MICU3	hsa-miR-122-5p	0.717906
STRN3	hsa-miR-143-3p	0.692955	ANKRD13C	hsa-miR-122-5p	0.715727
MIX23	hsa-miR-143-3p	0.691973	DICER1	hsa-miR-122-5p	0.715712
ATP11C	hsa-miR-143-3p	0.688282	FKBP5	hsa-miR-122-5p	0.713804
TPM3	hsa-miR-143-3p	0.687469	ST6GALNAC4	hsa-miR-122-5p	0.710338
ARHGAP26	hsa-miR-143-3p	0.687212	TBC1D10B	hsa-miR-122-5p	0.705228
KIF3B	hsa-miR-143-3p	0.686171	SLC41A1	hsa-miR-122-5p	0.703202
THRB	hsa-miR-143-3p	0.686098	BACH2	hsa-miR-122-5p	0.702804
TMOD2	hsa-miR-143-3p	0.685214	CLIC1	hsa-miR-122-5p	0.70255
GPR180	hsa-miR-143-3p	0.684795	G6PC3	hsa-miR-122-5p	0.701791
FAR1	hsa-miR-143-3p	0.683425	SOX11	hsa-miR-122-5p	0.698951
STXBP1	hsa-miR-143-3p	0.682723	MASP1	hsa-miR-122-5p	0.696023
MRTFB	hsa-miR-143-3p	0.679289	RFXAP	hsa-miR-122-5p	0.693266
CSNK1G3	hsa-miR-143-3p	0.678894	PDK4	hsa-miR-122-5p	0.691506
INO80D	hsa-miR-143-3p	0.678332	RIMS1	hsa-miR-122-5p	0.690104
CREBL2	hsa-miR-143-3p	0.677804	PRKRA	hsa-miR-122-5p	0.687456
LASP1	hsa-miR-143-3p	0.675614	ARFGEF1	hsa-miR-122-5p	0.685971
SINHCAF	hsa-miR-143-3p	0.674186	SLC52A2	hsa-miR-122-5p	0.685509
WWC3	hsa-miR-143-3p	0.673716	CDC42BPB	hsa-miR-122-5p	0.685223
MAB21L1	hsa-miR-143-3p	0.673083	ZBTB41	hsa-miR-122-5p	0.68341
RMND5A	hsa-miR-143-3p	0.672929	CLIC5	hsa-miR-122-5p	0.682745
MIPOL1	hsa-miR-143-3p	0.671691	G3BP2	hsa-miR-122-5p	0.681985
FRS2	hsa-miR-143-3p	0.671608	SPRY2	hsa-miR-122-5p	0.681116
FOSL2	hsa-miR-143-3p	0.669834	EPO	hsa-miR-122-5p	0.677496
ATP10A	hsa-miR-143-3p	0.669716	FUNDC2	hsa-miR-122-5p	0.673087
ZNF148	hsa-miR-143-3p	0.668159	PIP4K2A	hsa-miR-122-5p	0.671379
LRP12	hsa-miR-143-3p	0.667803	ADSS2	hsa-miR-122-5p	0.670198
ITGB8	hsa-miR-143-3p	0.666458	KIF5B	hsa-miR-122-5p	0.669929
FAM117A	hsa-miR-143-3p	0.666168	DUSP4	hsa-miR-122-5p	0.667316
EGLN1	hsa-miR-143-3p	0.665651	MAF1	hsa-miR-122-5p	0.66728
MLLT3	hsa-miR-143-3p	0.665606	PLEKHB2	hsa-miR-122-5p	0.666618
TUB	hsa-miR-143-3p	0.664072	BRPF1	hsa-miR-122-5p	0.664637
DYRK1B	hsa-miR-143-3p	0.663411	PTPRB	hsa-miR-122-5p	0.664563
CACNA1C	hsa-miR-143-3p	0.662772	CPEB1	hsa-miR-122-5p	0.663209
RASAL2	hsa-miR-143-3p	0.661388	SLC25A34	hsa-miR-122-5p	0.657106
ASAP3	hsa-miR-143-3p	0.657855	ESR1	hsa-miR-122-5p	0.656421
TNS3	hsa-miR-143-3p	0.656805	GALNT1	hsa-miR-122-5p	0.653488
CRLF3	hsa-miR-143-3p	0.65344	PIGS	hsa-miR-122-5p	0.653049
KLC2	hsa-miR-143-3p	0.652935	GRAMD2B	hsa-miR-122-5p	0.650273
TENT4B	hsa-miR-143-3p	0.652118	CALM3	hsa-miR-122-5p	0.649663
ESRRG	hsa-miR-143-3p	0.652047	CBL	hsa-miR-122-5p	0.649209
USP46	hsa-miR-143-3p	0.649996	MEIS2	hsa-miR-122-5p	0.647718
TMEM135	hsa-miR-143-3p	0.64862	CANX	hsa-miR-122-5p	0.647214
ARID3B	hsa-miR-143-3p	0.647476	GRHL2	hsa-miR-122-5p	0.645859
EBF1	hsa-miR-143-3p	0.647429	CCDC6	hsa-miR-122-5p	0.643965
PLAGL2	hsa-miR-143-3p	0.647053	CD320	hsa-miR-122-5p	0.643278
COL5A2	hsa-miR-143-3p	0.646983	LAMC1	hsa-miR-122-5p	0.642774
MEX3C	hsa-miR-143-3p	0.645911	STK24	hsa-miR-122-5p	0.641498
STAC	hsa-miR-143-3p	0.645824	DR1	hsa-miR-122-5p	0.638505
AMMECR1	hsa-miR-143-3p	0.645525	BRWD1	hsa-miR-122-5p	0.635257
SH3PXD2A	hsa-miR-143-3p	0.643518	GATAD2B	hsa-miR-122-5p	0.63358
CELF2	hsa-miR-143-3p	0.643502	NEGR1	hsa-miR-122-5p	0.631916
KLF5	hsa-miR-143-3p	0.64326	KDM2A	hsa-miR-122-5p	0.630205
GPD2	hsa-miR-143-3p	0.642414	KLHL18	hsa-miR-122-5p	0.627645
MAF	hsa-miR-143-3p	0.641487	CCNYL1	hsa-miR-122-5p	0.627404
MAP1B	hsa-miR-143-3p	0.640753	PLAG1	hsa-miR-122-5p	0.626524
CALM1	hsa-miR-143-3p	0.640395	FOXO3	hsa-miR-122-5p	0.625679
BMPR1A	hsa-miR-143-3p	0.638973	ANKIB1	hsa-miR-122-5p	0.623543
MAPK7	hsa-miR-143-3p	0.638716	SLC7A1	hsa-miR-122-5p	0.623458
CREB5	hsa-miR-143-3p	0.638026	SERP1	hsa-miR-122-5p	0.620436
MOGS	hsa-miR-143-3p	0.637336	RAD21	hsa-miR-122-5p	0.620221
NDFIP1	hsa-miR-143-3p	0.636856	CCDC97	hsa-miR-122-5p	0.618729
C1orf74	hsa-miR-143-3p	0.636504	NDRG3	hsa-miR-122-5p	0.616945
SLC39A10	hsa-miR-143-3p	0.635873	OCLN	hsa-miR-122-5p	0.61575
NAA30	hsa-miR-143-3p	0.633279	CCDC186	hsa-miR-122-5p	0.60808
DENND1B	hsa-miR-143-3p	0.630949	SOX6	hsa-miR-122-5p	0.60794
BLMH	hsa-miR-143-3p	0.629571	CTNND2	hsa-miR-122-5p	0.605941
GCNT1	hsa-miR-143-3p	0.627582	SLC12A6	hsa-miR-122-5p	0.604585
GID8	hsa-miR-143-3p	0.627473	NT5C3A	hsa-miR-122-5p	0.603618
ABHD14A	hsa-miR-143-3p	0.627124	AGO1	hsa-miR-122-5p	0.603482
NRG1	hsa-miR-143-3p	0.625875	MBNL1	hsa-miR-122-5p	0.603063
MEDAG	hsa-miR-143-3p	0.625862	IGSF5	hsa-miR-122-5p	0.601616
PPM1E	hsa-miR-143-3p	0.625379	CTDSPL2	hsa-miR-122-5p	0.601558
PAG1	hsa-miR-143-3p	0.624214
SLC39A11	hsa-miR-143-3p	0.623533
STOX2	hsa-miR-143-3p	0.623519
LBH	hsa-miR-143-3p	0.622896
FGF9	hsa-miR-143-3p	0.622565
ETV6	hsa-miR-143-3p	0.622548
GOLM1	hsa-miR-143-3p	0.622029
MIP	hsa-miR-143-3p	0.621504
SLC7A11	hsa-miR-143-3p	0.621399
REEP3	hsa-miR-143-3p	0.62101
KCND1	hsa-miR-143-3p	0.619726
ST8SIA4	hsa-miR-143-3p	0.619439
CHST10	hsa-miR-143-3p	0.619126
AKAP13	hsa-miR-143-3p	0.618269
TCF20	hsa-miR-143-3p	0.617333
TRAM2	hsa-miR-143-3p	0.616688
ASH1L	hsa-miR-143-3p	0.61643
IGF2R	hsa-miR-143-3p	0.614713
SYT3	hsa-miR-143-3p	0.614456
MPP3	hsa-miR-143-3p	0.613957
PSD3	hsa-miR-143-3p	0.613339
ZC3H15	hsa-miR-143-3p	0.61181
KAT7	hsa-miR-143-3p	0.611527
PDIA6	hsa-miR-143-3p	0.610675
EIF2AK3	hsa-miR-143-3p	0.610206
RASGEF1B	hsa-miR-143-3p	0.609921
CTNND1	hsa-miR-143-3p	0.609788
ZDHHC9	hsa-miR-143-3p	0.609289
PTPN11	hsa-miR-143-3p	0.607185
DDX6	hsa-miR-143-3p	0.605322
SSH2	hsa-miR-143-3p	0.60448
MCF2	hsa-miR-143-3p	0.603384
NEURL1	hsa-miR-143-3p	0.603124
CBX5	hsa-miR-143-3p	0.603101
TMEM121	hsa-miR-143-3p	0.603018
RNF11	hsa-miR-143-3p	0.600859
NFATC1	hsa-miR-143-3p	0.600665
FNDC3B	hsa-miR-143-3p	0.600465
SP3	hsa-miR-154-3p	0.752151
CNR1	hsa-miR-154-3p	0.736336
SIRT1	hsa-miR-154-3p	0.732198
YPEL4	hsa-miR-154-3p	0.719398
PPM1A	hsa-miR-154-3p	0.706154
AZIN1	hsa-miR-154-3p	0.691216
GPM6A	hsa-miR-154-3p	0.688739
DYRK1A	hsa-miR-154-3p	0.680396
ZEB2	hsa-miR-154-3p	0.674789
PDE4D	hsa-miR-154-3p	0.658607
AP1AR	hsa-miR-154-3p	0.653348
RHOA	hsa-miR-154-3p	0.648973
MAGI2	hsa-miR-154-3p	0.648568
STIM2	hsa-miR-154-3p	0.648186
ATP11C	hsa-miR-154-3p	0.644904
TEAD1	hsa-miR-154-3p	0.644893
CNKSR3	hsa-miR-154-3p	0.641944
CREBRF	hsa-miR-154-3p	0.639441
PRPF40A	hsa-miR-154-3p	0.637773
ZNF281	hsa-miR-154-3p	0.626901
SPRED2	hsa-miR-154-3p	0.62533
SNX6	hsa-miR-154-3p	0.620983
SINHCAF	hsa-miR-154-3p	0.618428
ENY2	hsa-miR-154-3p	0.617335
EVI5	hsa-miR-154-3p	0.613396
ABTB2	hsa-miR-154-3p	0.609795
CREBRF	hsa-miR-155-3p	0.683118
BRMS1L	hsa-miR-17-5p	0.895714
ARHGAP12	hsa-miR-17-5p	0.89525
MAP3K2	hsa-miR-17-5p	0.891466
PLEKHA3	hsa-miR-17-5p	0.888982
ZNFX1	hsa-miR-17-5p	0.88806
ARID4B	hsa-miR-17-5p	0.879767
EPHA4	hsa-miR-17-5p	0.878639
RAB22A	hsa-miR-17-5p	0.878115
ENPP5	hsa-miR-17-5p	0.875968
DYNC1LI2	hsa-miR-17-5p	0.873615
ZNF800	hsa-miR-17-5p	0.868637
FBXL5	hsa-miR-17-5p	0.866908
GPR137C	hsa-miR-17-5p	0.863645
ITPRIPL2	hsa-miR-17-5p	0.862465
E2F5	hsa-miR-17-5p	0.859768
FYCO1	hsa-miR-17-5p	0.855604
EZH1	hsa-miR-17-5p	0.853927
RRAGD	hsa-miR-17-5p	0.853887
PFN2	hsa-miR-17-5p	0.853728
PKD2	hsa-miR-17-5p	0.852693
VLDLR	hsa-miR-17-5p	0.851973
PRRG1	hsa-miR-17-5p	0.851575
ZBTB7A	hsa-miR-17-5p	0.851528
PTPN4	hsa-miR-17-5p	0.849562
STAT3	hsa-miR-17-5p	0.849329
E2F1	hsa-miR-17-5p	0.847843
CROT	hsa-miR-17-5p	0.847623
FCHO2	hsa-miR-17-5p	0.846427
STK17B	hsa-miR-17-5p	0.8457
RPS6KA5	hsa-miR-17-5p	0.842515
MKRN1	hsa-miR-17-5p	0.841292
TGFBR2	hsa-miR-17-5p	0.839835
MYT1L	hsa-miR-17-5p	0.838396
NABP1	hsa-miR-17-5p	0.83783
BCL11B	hsa-miR-17-5p	0.837217
TRAPPC14	hsa-miR-17-5p	0.835451
CFL2	hsa-miR-17-5p	0.835348
RUFY2	hsa-miR-17-5p	0.834176
ZBTB4	hsa-miR-17-5p	0.833897
NEDD4L	hsa-miR-17-5p	0.832946
TNFRSF21	hsa-miR-17-5p	0.832721
FGD4	hsa-miR-17-5p	0.832063
SACS	hsa-miR-17-5p	0.831914
MED12L	hsa-miR-17-5p	0.831907
ATAD2	hsa-miR-17-5p	0.831875
NPAS2	hsa-miR-17-5p	0.831081
ARID4A	hsa-miR-17-5p	0.830876
CDC37L1	hsa-miR-17-5p	0.83076
MASTL	hsa-miR-17-5p	0.829392
PFKP	hsa-miR-17-5p	0.828874
DDHD1	hsa-miR-17-5p	0.828526
PBX3	hsa-miR-17-5p	0.828017
USP3	hsa-miR-17-5p	0.826703
GLIS3	hsa-miR-17-5p	0.826227
SERP1	hsa-miR-17-5p	0.825953
RNF128	hsa-miR-17-5p	0.825749
ANKIB1	hsa-miR-17-5p	0.824061
ANKRD52	hsa-miR-17-5p	0.823913
EMSY	hsa-miR-17-5p	0.823743
SPOPL	hsa-miR-17-5p	0.823707
BTBD7	hsa-miR-17-5p	0.823685
DERL2	hsa-miR-17-5p	0.82331
SLC40A1	hsa-miR-17-5p	0.822311
CD69	hsa-miR-17-5p	0.822294
NUP35	hsa-miR-17-5p	0.822265
FRMD6	hsa-miR-17-5p	0.822254
LAMA3	hsa-miR-17-5p	0.822209
SAR1B	hsa-miR-17-5p	0.821439
RASL11B	hsa-miR-17-5p	0.821344
KIF23	hsa-miR-17-5p	0.819015
RGMA	hsa-miR-17-5p	0.81884
NR4A2	hsa-miR-17-5p	0.818064
TSG101	hsa-miR-17-5p	0.817612
EFCAB14	hsa-miR-17-5p	0.81746
ZFYVE26	hsa-miR-17-5p	0.816552
POLR3G	hsa-miR-17-5p	0.816314
KLHL28	hsa-miR-17-5p	0.815528
PTHLH	hsa-miR-17-5p	0.815204
APCDD1	hsa-miR-17-5p	0.814442
CLIP4	hsa-miR-17-5p	0.813409
DCUN1D3	hsa-miR-17-5p	0.81269
LIMA1	hsa-miR-17-5p	0.81176
FNBP1L	hsa-miR-17-5p	0.811527
ETV1	hsa-miR-17-5p	0.810892
LAPTM4A	hsa-miR-17-5p	0.809914
OXR1	hsa-miR-17-5p	0.809449
BTG3	hsa-miR-17-5p	0.809393
F3	hsa-miR-17-5p	0.809242
PPP3R1	hsa-miR-17-5p	0.809178
RBL2	hsa-miR-17-5p	0.808815
FJX1	hsa-miR-17-5p	0.807859
MINK1	hsa-miR-17-5p	0.806381
LHX6	hsa-miR-17-5p	0.805129
GPR6	hsa-miR-17-5p	0.805115
ZNF512B	hsa-miR-17-5p	0.804909
PPP6C	hsa-miR-17-5p	0.804882
RSRP1	hsa-miR-17-5p	0.80445
EIF5A2	hsa-miR-17-5p	0.804352
TRIP10	hsa-miR-17-5p	0.803976
UBE2W	hsa-miR-17-5p	0.803214
RSBN1	hsa-miR-17-5p	0.803111
CAPRIN2	hsa-miR-17-5p	0.802476
NAA30	hsa-miR-17-5p	0.802466
BMT2	hsa-miR-17-5p	0.802456
RHOC	hsa-miR-17-5p	0.801445
PXYLP1	hsa-miR-17-5p	0.800903
CNOT7	hsa-miR-17-5p	0.800035
SLITRK3	hsa-miR-17-5p	0.799703
TNKS2	hsa-miR-17-5p	0.799692
TMCC1	hsa-miR-17-5p	0.799539
NR4A3	hsa-miR-17-5p	0.799355
ZBTB18	hsa-miR-17-5p	0.799231
PPP1R21	hsa-miR-17-5p	0.798656
NTN4	hsa-miR-17-5p	0.797902
RGMB	hsa-miR-17-5p	0.797547
ARAP2	hsa-miR-17-5p	0.797218
PTPDC1	hsa-miR-17-5p	0.79628
LDLR	hsa-miR-17-5p	0.79566
JPT1	hsa-miR-17-5p	0.79511
RAP2C	hsa-miR-17-5p	0.794618
HIF1A	hsa-miR-17-5p	0.794003
BAMBI	hsa-miR-17-5p	0.793448
VASH2	hsa-miR-17-5p	0.792847
TBC1D20	hsa-miR-17-5p	0.792771
CALD1	hsa-miR-17-5p	0.792694
CCNG2	hsa-miR-17-5p	0.792314
ZNF367	hsa-miR-17-5p	0.792216
EGLN3	hsa-miR-17-5p	0.79142
TXNIP	hsa-miR-17-5p	0.790785
METAP1	hsa-miR-17-5p	0.78916
YPEL2	hsa-miR-17-5p	0.789099
HBP1	hsa-miR-17-5p	0.7886
ZNF704	hsa-miR-17-5p	0.788517
KLHL2	hsa-miR-17-5p	0.787837
WDR37	hsa-miR-17-5p	0.787672
TWF1	hsa-miR-17-5p	0.787474
ITGB8	hsa-miR-17-5p	0.78737
ATG16L1	hsa-miR-17-5p	0.787121
TRIM8	hsa-miR-17-5p	0.78646
FAM126B	hsa-miR-17-5p	0.786147
PEX5L	hsa-miR-17-5p	0.786037
NKIRAS1	hsa-miR-17-5p	0.785519
TMEM64	hsa-miR-17-5p	0.785392
DOCK4	hsa-miR-17-5p	0.785088
BTBD10	hsa-miR-17-5p	0.785076
ZFAND4	hsa-miR-17-5p	0.784618
EPHA7	hsa-miR-17-5p	0.784479
KMT2B	hsa-miR-17-5p	0.783956
BNIP2	hsa-miR-17-5p	0.783817
PRR15	hsa-miR-17-5p	0.783074
CHD9	hsa-miR-17-5p	0.782838
ANKFY1	hsa-miR-17-5p	0.782589
DPYSL5	hsa-miR-17-5p	0.782518
CEP97	hsa-miR-17-5p	0.782514
NBEA	hsa-miR-17-5p	0.782463
GAB1	hsa-miR-17-5p	0.782056
FNDC3A	hsa-miR-17-5p	0.782002
RAB5B	hsa-miR-17-5p	0.781253
CMPK1	hsa-miR-17-5p	0.781235
REEP3	hsa-miR-17-5p	0.781115
SLC17A7	hsa-miR-17-5p	0.781042
HECTD2	hsa-miR-17-5p	0.780251
TANC1	hsa-miR-17-5p	0.78018
CDKN1A	hsa-miR-17-5p	0.779938
GNS	hsa-miR-17-5p	0.779869
RBBP7	hsa-miR-17-5p	0.779698
ADAM9	hsa-miR-17-5p	0.778277
PLCXD3	hsa-miR-181b-3p	0.610684
NEDD9	hsa-miR-18a-5p	0.875103
PDE4D	hsa-miR-18a-5p	0.8649
ESR1	hsa-miR-18a-5p	0.856338
HIF1A	hsa-miR-18a-5p	0.842172
CREBL2	hsa-miR-18a-5p	0.832489
PHC3	hsa-miR-18a-5p	0.832045
ERI1	hsa-miR-18a-5p	0.832011
CDK19	hsa-miR-18a-5p	0.831283
RORA	hsa-miR-18a-5p	0.831224
BTG3	hsa-miR-18a-5p	0.829904
CEMIP2	hsa-miR-18a-5p	0.823842
TMEM170B	hsa-miR-18a-5p	0.821675
PTGFRN	hsa-miR-18a-5p	0.820585
UBTD2	hsa-miR-18a-5p	0.818964
PHF19	hsa-miR-18a-5p	0.817491
IRF2	hsa-miR-18a-5p	0.81233
ZNF367	hsa-miR-18a-5p	0.811514
TRIOBP	hsa-miR-18a-5p	0.806263
KCNA1	hsa-miR-18a-5p	0.806077
SMAD2	hsa-miR-18a-5p	0.802823
HMBOX1	hsa-miR-18a-5p	0.80225
TRAPPC8	hsa-miR-18a-5p	0.802107
RABGAP1	hsa-miR-18a-5p	0.792553
NEDD4	hsa-miR-18a-5p	0.791491
RNF145	hsa-miR-18a-5p	0.78958
MAPK4	hsa-miR-18a-5p	0.787932
ADD3	hsa-miR-18a-5p	0.787404
NR3C1	hsa-miR-18a-5p	0.787227
PATJ	hsa-miR-18a-5p	0.784368
RAB5C	hsa-miR-18a-5p	0.783483
CAMK2N1	hsa-miR-18a-5p	0.782442
SUCO	hsa-miR-18a-5p	0.782147
GIGYF1	hsa-miR-18a-5p	0.77988
ZBTB47	hsa-miR-18a-5p	0.779782
KLHL20	hsa-miR-18a-5p	0.779679
TMEM248	hsa-miR-18a-5p	0.778586
TRIB2	hsa-miR-18a-5p	0.778403
CDC42	hsa-miR-18a-5p	0.778006
MBNL1	hsa-miR-18a-5p	0.777698
ORAI3	hsa-miR-18a-5p	0.777581
ENC1	hsa-miR-18a-5p	0.776717
MAP3K1	hsa-miR-18a-5p	0.776018
PSD3	hsa-miR-18a-5p	0.775613
STK4	hsa-miR-18a-5p	0.77031
BBX	hsa-miR-18a-5p	0.769634
ATXN1	hsa-miR-18a-5p	0.769562
RBBP8	hsa-miR-18a-5p	0.769289
FRS2	hsa-miR-18a-5p	0.768348
MAP7D1	hsa-miR-18a-5p	0.76738
CRIM1	hsa-miR-18a-5p	0.766627
FRYL	hsa-miR-18a-5p	0.765165
AEBP2	hsa-miR-18a-5p	0.762023
SH3BP4	hsa-miR-18a-5p	0.76138
HSF2	hsa-miR-18a-5p	0.760728
KPNA6	hsa-miR-18a-5p	0.760372
ZBTB4	hsa-miR-18a-5p	0.759851
PHF2	hsa-miR-18a-5p	0.7584
NCOA1	hsa-miR-18a-5p	0.75812
ETV6	hsa-miR-18a-5p	0.757654
PRKACB	hsa-miR-18a-5p	0.754785
MYLK	hsa-miR-18a-5p	0.754584
SOCS5	hsa-miR-18a-5p	0.753769
CCN2	hsa-miR-18a-5p	0.753074
TRIM2	hsa-miR-18a-5p	0.752713
TBPL1	hsa-miR-18a-5p	0.752387
ASXL2	hsa-miR-18a-5p	0.750861
FCHSD2	hsa-miR-18a-5p	0.750587
MACIR	hsa-miR-18a-5p	0.750529
ZNF704	hsa-miR-18a-5p	0.750217
LSM14B	hsa-miR-18a-5p	0.74674
FAM3C	hsa-miR-18a-5p	0.746278
RUNX1	hsa-miR-18a-5p	0.744451
SORBS2	hsa-miR-18a-5p	0.744217
SMAP2	hsa-miR-18a-5p	0.743134
KCMF1	hsa-miR-18a-5p	0.742427
TWF1	hsa-miR-18a-5p	0.740265
GCLC	hsa-miR-18a-5p	0.740156
F3	hsa-miR-18a-5p	0.73989
CCND2	hsa-miR-18a-5p	0.738063
KCNJ2	hsa-miR-18a-5p	0.737752
ALCAM	hsa-miR-18a-5p	0.73706
DICER1	hsa-miR-18a-5p	0.734833
GLRB	hsa-miR-18a-5p	0.732046
ZCCHC3	hsa-miR-18a-5p	0.730357
LIF	hsa-miR-18a-5p	0.73016
TNFAIP3	hsa-miR-18a-5p	0.729931
SLC12A6	hsa-miR-18a-5p	0.727899
PARD6B	hsa-miR-18a-5p	0.726025
DIP2C	hsa-miR-18a-5p	0.724044
ZBTB44	hsa-miR-18a-5p	0.723251
ANKRD13C	hsa-miR-18a-5p	0.722009
HMGCS1	hsa-miR-18a-5p	0.721961
KDM2A	hsa-miR-18a-5p	0.719622
FNDC3B	hsa-miR-18a-5p	0.717566
LMO4	hsa-miR-18a-5p	0.717493
STAM2	hsa-miR-18a-5p	0.713376
DOCK4	hsa-miR-18a-5p	0.712814
THBS1	hsa-miR-18a-5p	0.711458
NAA50	hsa-miR-18a-5p	0.711436
SAR1A	hsa-miR-18a-5p	0.709818
MTF1	hsa-miR-18a-5p	0.709732
EPB41L1	hsa-miR-18a-5p	0.709505
UBE2Z	hsa-miR-18a-5p	0.709086
PRDM6	hsa-miR-18a-5p	0.708953
RCOR1	hsa-miR-18a-5p	0.705019
KDM5B	hsa-miR-18a-5p	0.704437
SNRK	hsa-miR-18a-5p	0.702703
RAB22A	hsa-miR-18a-5p	0.702113
RAB11FIP2	hsa-miR-18a-5p	0.701876
ANKRD50	hsa-miR-18a-5p	0.701698
DAAM2	hsa-miR-18a-5p	0.700896
LIN54	hsa-miR-18a-5p	0.696511
BHLHE22	hsa-miR-18a-5p	0.696079
HCFC2	hsa-miR-18a-5p	0.695613
HEATR5A	hsa-miR-18a-5p	0.695504
ATXN2L	hsa-miR-18a-5p	0.693513
CTDSPL	hsa-miR-18a-5p	0.69204
ATM	hsa-miR-18a-5p	0.692036
FBXL3	hsa-miR-18a-5p	0.690624
PAPPA	hsa-miR-18a-5p	0.689791
TTPAL	hsa-miR-18a-5p	0.686721
MBOAT2	hsa-miR-18a-5p	0.686427
ATP8A1	hsa-miR-18a-5p	0.686211
VMA21	hsa-miR-18a-5p	0.68534
XYLT2	hsa-miR-18a-5p	0.684043
ZFP62	hsa-miR-18a-5p	0.681763
EPHA7	hsa-miR-18a-5p	0.679656
XYLT1	hsa-miR-18a-5p	0.678483
TEX2	hsa-miR-18a-5p	0.678449
CCDC88A	hsa-miR-18a-5p	0.67837
LIN28A	hsa-miR-18a-5p	0.677722
NR1H2	hsa-miR-18a-5p	0.676458
SMG1	hsa-miR-18a-5p	0.673357
IGF1	hsa-miR-18a-5p	0.672434
CHRM2	hsa-miR-18a-5p	0.671516
KCNH7	hsa-miR-18a-5p	0.670563
NXT2	hsa-miR-18a-5p	0.670317
CSRNP3	hsa-miR-18a-5p	0.670108
FOXH1	hsa-miR-18a-5p	0.669172
YPEL5	hsa-miR-18a-5p	0.669003
MDGA1	hsa-miR-18a-5p	0.668956
BRWD3	hsa-miR-18a-5p	0.667883
OLFML2B	hsa-miR-18a-5p	0.665464
TOR1B	hsa-miR-18a-5p	0.663829
NFAT5	hsa-miR-18a-5p	0.663073
SIX3	hsa-miR-18a-5p	0.662462
KLHL15	hsa-miR-18a-5p	0.660811
SIK3	hsa-miR-18a-5p	0.657799
EHMT1	hsa-miR-18a-5p	0.655369
IGF2BP2	hsa-miR-18a-5p	0.654544
DIRAS2	hsa-miR-18a-5p	0.653291
SYNCRIP	hsa-miR-18a-5p	0.65319
KIF3B	hsa-miR-18a-5p	0.652119
SMARCC2	hsa-miR-18a-5p	0.652079
STRIP2	hsa-miR-18a-5p	0.643128
IPMK	hsa-miR-18a-5p	0.642853
FAM229B	hsa-miR-18a-5p	0.641811
CADM2	hsa-miR-18a-5p	0.640342
C1orf21	hsa-miR-18a-5p	0.640207
BRWD1	hsa-miR-18a-5p	0.640062
TLL2	hsa-miR-18a-5p	0.638654
SH3KBP1	hsa-miR-18a-5p	0.636814
CDK2	hsa-miR-18a-5p	0.635614
RAB9A	hsa-miR-18a-5p	0.635311
TPM3	hsa-miR-18a-5p	0.633518
NREP	hsa-miR-18a-5p	0.631641
HSF5	hsa-miR-18a-5p	0.63126
BRMS1L	hsa-miR-20a-5p	0.900941
PLEKHA3	hsa-miR-20a-5p	0.896991
MAP3K2	hsa-miR-20a-5p	0.89345
ZNFX1	hsa-miR-20a-5p	0.892671
ARHGAP12	hsa-miR-20a-5p	0.891493
ENPP5	hsa-miR-20a-5p	0.88937
EPHA4	hsa-miR-20a-5p	0.881204
ZNF800	hsa-miR-20a-5p	0.880317
PKD2	hsa-miR-20a-5p	0.8774
VLDLR	hsa-miR-20a-5p	0.873988
RAB22A	hsa-miR-20a-5p	0.873702
DYNC1LI2	hsa-miR-20a-5p	0.871869
ARID4B	hsa-miR-20a-5p	0.870493
FBXL5	hsa-miR-20a-5p	0.869304
ITPRIPL2	hsa-miR-20a-5p	0.863438
GPR137C	hsa-miR-20a-5p	0.862339
STK17B	hsa-miR-20a-5p	0.860311
RRAGD	hsa-miR-20a-5p	0.859933
DDHD1	hsa-miR-20a-5p	0.858933
MYT1L	hsa-miR-20a-5p	0.858401
EZH1	hsa-miR-20a-5p	0.857819
E2F5	hsa-miR-20a-5p	0.857616
PFN2	hsa-miR-20a-5p	0.855398
PRRG1	hsa-miR-20a-5p	0.854434
MKRN1	hsa-miR-20a-5p	0.85419
ZBTB7A	hsa-miR-20a-5p	0.853272
RPS6KA5	hsa-miR-20a-5p	0.850166
ZFYVE26	hsa-miR-20a-5p	0.849292
MASTL	hsa-miR-20a-5p	0.848006
MED12L	hsa-miR-20a-5p	0.845986
E2F1	hsa-miR-20a-5p	0.845207
CDC37L1	hsa-miR-20a-5p	0.844965
CROT	hsa-miR-20a-5p	0.84329
FCHO2	hsa-miR-20a-5p	0.843162
TRAPPC14	hsa-miR-20a-5p	0.842826
TGFBR2	hsa-miR-20a-5p	0.842445
BCL11B	hsa-miR-20a-5p	0.841454
PTPN4	hsa-miR-20a-5p	0.840983
SLC40A1	hsa-miR-20a-5p	0.840822
ANKRD52	hsa-miR-20a-5p	0.840149
DERL2	hsa-miR-20a-5p	0.838416
NPAS2	hsa-miR-20a-5p	0.838353
NABP1	hsa-miR-20a-5p	0.837886
ARID4A	hsa-miR-20a-5p	0.837855
ANKIB1	hsa-miR-20a-5p	0.835721
USP3	hsa-miR-20a-5p	0.834668
CFL2	hsa-miR-20a-5p	0.834598
EMSY	hsa-miR-20a-5p	0.834467
RNF128	hsa-miR-20a-5p	0.833752
FRMD6	hsa-miR-20a-5p	0.833538
SACS	hsa-miR-20a-5p	0.833312
EFCAB14	hsa-miR-20a-5p	0.832785
PBX3	hsa-miR-20a-5p	0.832776
PFKP	hsa-miR-20a-5p	0.83251
FGD4	hsa-miR-20a-5p	0.83212
NUP35	hsa-miR-20a-5p	0.831417
BTG3	hsa-miR-20a-5p	0.831173
SERP1	hsa-miR-20a-5p	0.831167
GPR6	hsa-miR-20a-5p	0.830865
TNFRSF21	hsa-miR-20a-5p	0.83041
ZBTB4	hsa-miR-20a-5p	0.830406
FYCO1	hsa-miR-20a-5p	0.830105
BTBD7	hsa-miR-20a-5p	0.829997
GLIS3	hsa-miR-20a-5p	0.829205
ATAD2	hsa-miR-20a-5p	0.828292
LAPTM4A	hsa-miR-20a-5p	0.828018
NEDD4L	hsa-miR-20a-5p	0.827435
RASL11B	hsa-miR-20a-5p	0.827002
KIF23	hsa-miR-20a-5p	0.826692
FNBP1L	hsa-miR-20a-5p	0.825936
ITGB8	hsa-miR-20a-5p	0.824242
CLIP4	hsa-miR-20a-5p	0.823693
SPOPL	hsa-miR-20a-5p	0.82359
TRIP10	hsa-miR-20a-5p	0.823181
RUFY2	hsa-miR-20a-5p	0.823033
PTHLH	hsa-miR-20a-5p	0.82293
STAT3	hsa-miR-20a-5p	0.82267
HBP1	hsa-miR-20a-5p	0.821689
TSG101	hsa-miR-20a-5p	0.821476
LAMA3	hsa-miR-20a-5p	0.821291
ATG16L1	hsa-miR-20a-5p	0.820745
KLHL28	hsa-miR-20a-5p	0.82073
PPP3R1	hsa-miR-20a-5p	0.820603
SAR1B	hsa-miR-20a-5p	0.819705
NKIRAS1	hsa-miR-20a-5p	0.818862
RSRP1	hsa-miR-20a-5p	0.818555
RHOC	hsa-miR-20a-5p	0.817749
CD69	hsa-miR-20a-5p	0.817707
RSBN1	hsa-miR-20a-5p	0.8168
KLHL2	hsa-miR-20a-5p	0.816662
RGMA	hsa-miR-20a-5p	0.81523
NTN4	hsa-miR-20a-5p	0.814322
OXR1	hsa-miR-20a-5p	0.814309
TNKS2	hsa-miR-20a-5p	0.813552
PPP6C	hsa-miR-20a-5p	0.81219
ZNF704	hsa-miR-20a-5p	0.811483
POLR3G	hsa-miR-20a-5p	0.811481
BTBD10	hsa-miR-20a-5p	0.811449
NR4A2	hsa-miR-20a-5p	0.811315
BAMBI	hsa-miR-20a-5p	0.81118
RBL2	hsa-miR-20a-5p	0.811066
APCDD1	hsa-miR-20a-5p	0.81086
FJX1	hsa-miR-20a-5p	0.810583
BNIP2	hsa-miR-20a-5p	0.8105
TBC1D20	hsa-miR-20a-5p	0.810435
F3	hsa-miR-20a-5p	0.80985
CAPRIN2	hsa-miR-20a-5p	0.808772
ZNF367	hsa-miR-20a-5p	0.808381
CEP97	hsa-miR-20a-5p	0.806612
LIMA1	hsa-miR-20a-5p	0.806437
RGMB	hsa-miR-20a-5p	0.806204
EPHA7	hsa-miR-20a-5p	0.805652
VSX1	hsa-miR-20a-5p	0.804647
CDKN1A	hsa-miR-20a-5p	0.803983
GOSR1	hsa-miR-20a-5p	0.803971
RAB5B	hsa-miR-20a-5p	0.803784
DENND10	hsa-miR-20a-5p	0.803476
SLITRK3	hsa-miR-20a-5p	0.803209
JPT1	hsa-miR-20a-5p	0.8018
NPAT	hsa-miR-20a-5p	0.801645
ZFAND4	hsa-miR-20a-5p	0.800738
VASH2	hsa-miR-20a-5p	0.800618
MINK1	hsa-miR-20a-5p	0.80052
YPEL2	hsa-miR-20a-5p	0.800046
UBE2W	hsa-miR-20a-5p	0.799183
DPYSL5	hsa-miR-20a-5p	0.798619
PTPDC1	hsa-miR-20a-5p	0.797054
CNOT7	hsa-miR-20a-5p	0.797009
ETV1	hsa-miR-20a-5p	0.796454
MAP3K9	hsa-miR-20a-5p	0.795478
DENND5B	hsa-miR-20a-5p	0.794997
LHX6	hsa-miR-20a-5p	0.794877
TMCC1	hsa-miR-20a-5p	0.794686
TWF1	hsa-miR-20a-5p	0.794469
ZBTB18	hsa-miR-20a-5p	0.794328
ZNF512B	hsa-miR-20a-5p	0.794234
C2CD2	hsa-miR-20a-5p	0.793105
FAM126B	hsa-miR-20a-5p	0.792321
ARAP2	hsa-miR-20a-5p	0.791868
PRR15	hsa-miR-20a-5p	0.791238
CCNG2	hsa-miR-20a-5p	0.7911
METAP1	hsa-miR-20a-5p	0.790825
SLC17A7	hsa-miR-20a-5p	0.790692
CALD1	hsa-miR-20a-5p	0.790576
USP46	hsa-miR-20a-5p	0.790505
ZFYVE9	hsa-miR-20a-5p	0.790369
DCUN1D3	hsa-miR-20a-5p	0.790149
EGLN3	hsa-miR-20a-5p	0.78982
TXNIP	hsa-miR-20a-5p	0.78953
KMT2B	hsa-miR-20a-5p	0.789042
PDCD1LG2	hsa-miR-20a-5p	0.788902
FEM1C	hsa-miR-20a-5p	0.788028
RAP2C	hsa-miR-20a-5p	0.787689
TMEM64	hsa-miR-20a-5p	0.787513
NAA30	hsa-miR-20a-5p	0.786768
PEX5L	hsa-miR-20a-5p	0.786591
TNFAIP1	hsa-miR-20a-5p	0.78649
DOCK4	hsa-miR-20a-5p	0.786256
EIF5A2	hsa-miR-20a-5p	0.785352
HECTD2	hsa-miR-20a-5p	0.785133
NR4A3	hsa-miR-20a-5p	0.784847
TRIM36	hsa-miR-20a-5p	0.784565
TBC1D9	hsa-miR-20a-5p	0.783785
EREG	hsa-miR-20a-5p	0.782875
RUNX1T1	hsa-miR-21-3p	0.647747
ATP1B1	hsa-miR-21-3p	0.647251
RSRC2	hsa-miR-21-3p	0.641261
ZNF326	hsa-miR-21-3p	0.614791
NAA15	hsa-miR-21-3p	0.613298
LYPLA2	hsa-miR-296-5p	0.752354
AMMECR1L	hsa-miR-296-5p	0.745894
HMGA1	hsa-miR-296-5p	0.741558
RNF44	hsa-miR-296-5p	0.741454
KMT2B	hsa-miR-296-5p	0.721913
VKORC1L1	hsa-miR-296-5p	0.720256
ATG2B	hsa-miR-296-5p	0.715297
HIPK1	hsa-miR-296-5p	0.709633
SRF	hsa-miR-296-5p	0.696633
DYRK1B	hsa-miR-296-5p	0.68909
TMEM135	hsa-miR-296-5p	0.686949
NUMBL	hsa-miR-296-5p	0.676689
ONECUT2	hsa-miR-296-5p	0.675309
PHC2	hsa-miR-296-5p	0.675216
ACTR1A	hsa-miR-296-5p	0.671412
TEAD3	hsa-miR-296-5p	0.669358
MACF1	hsa-miR-296-5p	0.649588
KCTD15	hsa-miR-296-5p	0.645563
FBRS	hsa-miR-296-5p	0.639387
ADAMTS10	hsa-miR-296-5p	0.63481
PPP2R5B	hsa-miR-296-5p	0.631652
IPO11	hsa-miR-296-5p	0.6295
ECHDC1	hsa-miR-296-5p	0.628428
GMPR	hsa-miR-296-5p	0.622597
SOX12	hsa-miR-296-5p	0.619801
CAD	hsa-miR-296-5p	0.614471
ZC3H7B	hsa-miR-296-5p	0.609372
BBC3	hsa-miR-296-5p	0.609209
CACNG8	hsa-miR-296-5p	0.608002
PPFIA3	hsa-miR-296-5p	0.604097
CBX5	hsa-miR-30b-3p	0.685128
NDST1	hsa-miR-30b-3p	0.658883
PAPOLG	hsa-miR-30b-3p	0.651633
FOXP4	hsa-miR-30b-3p	0.628499
IRGQ	hsa-miR-30b-3p	0.604905
ZNF827	hsa-miR-30b-3p	0.602331
STK38L	hsa-miR-34b-5p	0.723718
DLL1	hsa-miR-34b-5p	0.705357
MET	hsa-miR-34b-5p	0.676653
FOXP1	hsa-miR-34b-5p	0.672811
CDK19	hsa-miR-34b-5p	0.656733
NOTCH1	hsa-miR-34b-5p	0.653519
CYRIB	hsa-miR-34b-5p	0.652927
TENM1	hsa-miR-34b-5p	0.643714
ZZZ3	hsa-miR-34b-5p	0.639503
PLEKHA1	hsa-miR-34b-5p	0.637719
MAPK1IP1L	hsa-miR-34b-5p	0.617495
NFAT5	hsa-miR-34b-5p	0.611418
ZBTB10	hsa-miR-34b-5p	0.610096
ARFGEF1	hsa-miR-3613-5p	0.641191
PAPPA	hsa-miR-424-5p	0.907467
PHF19	hsa-miR-424-5p	0.902192
SPRYD3	hsa-miR-424-5p	0.901962
NUP50	hsa-miR-424-5p	0.887351
TLK1	hsa-miR-424-5p	0.8803
ANO3	hsa-miR-424-5p	0.879308
SHOC2	hsa-miR-424-5p	0.877809
CNOT6L	hsa-miR-424-5p	0.874101
AXIN2	hsa-miR-424-5p	0.869585
ARL3	hsa-miR-424-5p	0.868744
SLC25A22	hsa-miR-424-5p	0.866129
RNF217	hsa-miR-424-5p	0.866003
FBXO21	hsa-miR-424-5p	0.864208
FGF2	hsa-miR-424-5p	0.863895
BTRC	hsa-miR-424-5p	0.86346
LRP6	hsa-miR-424-5p	0.862976
RASGEF1B	hsa-miR-424-5p	0.862258
GPR63	hsa-miR-424-5p	0.861962
PTPN3	hsa-miR-424-5p	0.860899
CPEB2	hsa-miR-424-5p	0.860627
PAFAH1B1	hsa-miR-424-5p	0.857431
CCND2	hsa-miR-424-5p	0.857295
MYB	hsa-miR-424-5p	0.854612
FGFR1	hsa-miR-424-5p	0.852594
RPS6KA3	hsa-miR-424-5p	0.851251
RECK	hsa-miR-424-5p	0.850608
BTG2	hsa-miR-424-5p	0.849432
BCL2L2	hsa-miR-424-5p	0.84902
GPATCH8	hsa-miR-424-5p	0.848057
WEE1	hsa-miR-424-5p	0.848029
DYNC1I1	hsa-miR-424-5p	0.847663
MED26	hsa-miR-424-5p	0.84678
ASH1L	hsa-miR-424-5p	0.845577
INSR	hsa-miR-424-5p	0.844995
PPM1D	hsa-miR-424-5p	0.844707
KIF23	hsa-miR-424-5p	0.844375
MOB4	hsa-miR-424-5p	0.844189
EYA1	hsa-miR-424-5p	0.843085
PLAG1	hsa-miR-424-5p	0.842993
USP25	hsa-miR-424-5p	0.84238
PTCH1	hsa-miR-424-5p	0.842275
FAM91A1	hsa-miR-424-5p	0.841722
STXBP3	hsa-miR-424-5p	0.841658
SCOC	hsa-miR-424-5p	0.839546
PID1	hsa-miR-424-5p	0.837504
PIP4P1	hsa-miR-424-5p	0.837339
SGK1	hsa-miR-424-5p	0.837191
N4BP1	hsa-miR-424-5p	0.837165
CCND1	hsa-miR-424-5p	0.836149
FBXW7	hsa-miR-424-5p	0.834805
KCNJ2	hsa-miR-424-5p	0.83449
WDTC1	hsa-miR-424-5p	0.834295
CAPZA2	hsa-miR-424-5p	0.834269
PLSCR4	hsa-miR-424-5p	0.833951
ACVR2A	hsa-miR-424-5p	0.833788
CDK17	hsa-miR-424-5p	0.833419
CPD	hsa-miR-424-5p	0.833177
BDNF	hsa-miR-424-5p	0.832087
XPO7	hsa-miR-424-5p	0.831488
COL12A1	hsa-miR-424-5p	0.831423
PIP4P2	hsa-miR-424-5p	0.830688
UBE2Q1	hsa-miR-424-5p	0.830569
HIGD1A	hsa-miR-424-5p	0.829178
C1orf21	hsa-miR-424-5p	0.828822
C2orf42	hsa-miR-424-5p	0.828411
SETD3	hsa-miR-424-5p	0.828341
TBPL1	hsa-miR-424-5p	0.827797
AHCYL2	hsa-miR-424-5p	0.827704
RBBP6	hsa-miR-424-5p	0.827067
TGIF2	hsa-miR-424-5p	0.826072
KIF21A	hsa-miR-424-5p	0.825988
SLC35G1	hsa-miR-424-5p	0.825607
AKT3	hsa-miR-424-5p	0.825525
GAREM1	hsa-miR-424-5p	0.82509
UBE4B	hsa-miR-424-5p	0.825022
DMTF1	hsa-miR-424-5p	0.824839
MAP7	hsa-miR-424-5p	0.82477
DLL1	hsa-miR-424-5p	0.824587
HELZ	hsa-miR-424-5p	0.823749
SMAD7	hsa-miR-424-5p	0.823315
USP42	hsa-miR-424-5p	0.822815
MGAT4A	hsa-miR-424-5p	0.82204
TNRC6B	hsa-miR-424-5p	0.821954
PELI2	hsa-miR-424-5p	0.821834
CDC37L1	hsa-miR-424-5p	0.820396
CHPT1	hsa-miR-424-5p	0.82037
ARHGAP5	hsa-miR-424-5p	0.819897
PURA	hsa-miR-424-5p	0.819466
CCNT2	hsa-miR-424-5p	0.81932
FASN	hsa-miR-424-5p	0.819243
LATS2	hsa-miR-424-5p	0.819024
RIC1	hsa-miR-424-5p	0.818999
MAP2K1	hsa-miR-424-5p	0.81873
HSPA4L	hsa-miR-424-5p	0.818086
CSDE1	hsa-miR-424-5p	0.81808
VEGFA	hsa-miR-424-5p	0.817835
PEX13	hsa-miR-424-5p	0.817544
DNAJB4	hsa-miR-424-5p	0.817231
SPRED1	hsa-miR-424-5p	0.816918
CDC42SE2	hsa-miR-424-5p	0.815518
CLCN5	hsa-miR-424-5p	0.815436
NAA25	hsa-miR-424-5p	0.8152
WIPI2	hsa-miR-424-5p	0.814613
CDCA4	hsa-miR-424-5p	0.814505
CLOCK	hsa-miR-424-5p	0.813535
ADAMTS3	hsa-miR-424-5p	0.813206
TMEM100	hsa-miR-424-5p	0.812609
SLC9A6	hsa-miR-424-5p	0.812473
SOCS6	hsa-miR-424-5p	0.81205
ZBTB44	hsa-miR-424-5p	0.8115
YTHDC1	hsa-miR-424-5p	0.811216
PDCD4	hsa-miR-424-5p	0.810884
E2F3	hsa-miR-424-5p	0.810879
RNF138	hsa-miR-424-5p	0.810662
EDA	hsa-miR-424-5p	0.809777
LUZP1	hsa-miR-424-5p	0.809533
ADAMTS5	hsa-miR-424-5p	0.808953
CYP26B1	hsa-miR-424-5p	0.808258
IPPK	hsa-miR-424-5p	0.807949
SPTLC1	hsa-miR-424-5p	0.807607
DESI1	hsa-miR-424-5p	0.807061
ARIH1	hsa-miR-424-5p	0.806927
FGF7	hsa-miR-424-5p	0.806857
CACUL1	hsa-miR-424-5p	0.806804
SIAH1	hsa-miR-424-5p	0.806473
RSBN1	hsa-miR-424-5p	0.806148
SLC2A3	hsa-miR-424-5p	0.806063
RUNX1T1	hsa-miR-424-5p	0.805067
MIB1	hsa-miR-424-5p	0.804969
PCMT1	hsa-miR-424-5p	0.804863
MOB3B	hsa-miR-424-5p	0.804132
ZBTB34	hsa-miR-424-5p	0.803838
AMER1	hsa-miR-424-5p	0.803664
TMEM255A	hsa-miR-424-5p	0.803594
GNAI3	hsa-miR-424-5p	0.803352
SYNRG	hsa-miR-424-5p	0.803169
RBMS1	hsa-miR-424-5p	0.802967
CUL2	hsa-miR-424-5p	0.802801
RSPO3	hsa-miR-424-5p	0.802073
ANKIB1	hsa-miR-424-5p	0.801976
USP3	hsa-miR-424-5p	0.801953
DYRK1B	hsa-miR-424-5p	0.801866
PTPRR	hsa-miR-424-5p	0.80164
MYLK	hsa-miR-424-5p	0.801418
CCNJL	hsa-miR-424-5p	0.801226
KLHL18	hsa-miR-424-5p	0.800589
PRRC2C	hsa-miR-424-5p	0.800454
CLDN12	hsa-miR-424-5p	0.800335
EPHA7	hsa-miR-424-5p	0.800316
ZNF449	hsa-miR-424-5p	0.800304
ZNF622	hsa-miR-424-5p	0.799979
PHACTR2	hsa-miR-424-5p	0.79992
MYT1L	hsa-miR-424-5p	0.799896
SYNJ1	hsa-miR-424-5p	0.799619
RAP2C	hsa-miR-424-5p	0.799605
APLN	hsa-miR-424-5p	0.799301
CRIM1	hsa-miR-424-5p	0.799234
AGO4	hsa-miR-424-5p	0.798895
SEPTIN2	hsa-miR-424-5p	0.798799
SALL1	hsa-miR-424-5p	0.798528
BORCS6	hsa-miR-424-5p	0.797468
UBR3	hsa-miR-424-5p	0.797237
PDIA6	hsa-miR-424-5p	0.796922
PPM1A	hsa-miR-424-5p	0.796913
PTPN4	hsa-miR-424-5p	0.796812
VTI1B	hsa-miR-424-5p	0.796705
MKNK1	hsa-miR-424-5p	0.796534
LSM11	hsa-miR-424-5p	0.795918
SNCG	hsa-miR-424-5p	0.795723
KIF5C	hsa-miR-424-5p	0.795339
USP15	hsa-miR-424-5p	0.795339
CLCN3	hsa-miR-424-5p	0.795213
ELL	hsa-miR-424-5p	0.795192
CHEK1	hsa-miR-424-5p	0.794922
AEBP2	hsa-miR-424-5p	0.794904
AREL1	hsa-miR-424-5p	0.794577
CAPRIN1	hsa-miR-424-5p	0.794497
UBN2	hsa-miR-424-5p	0.794446
POLR3F	hsa-miR-424-5p	0.794167
FMR1	hsa-miR-874-3p	0.750833
MSRB3	hsa-miR-874-3p	0.727274
HIF1AN	hsa-miR-874-3p	0.719551
TIMM22	hsa-miR-874-3p	0.719234
CYB561D1	hsa-miR-874-3p	0.718822
RGS4	hsa-miR-874-3p	0.700878
ADAM19	hsa-miR-874-3p	0.700742
NR2C2	hsa-miR-874-3p	0.692382
BDH1	hsa-miR-874-3p	0.687199
ZDHHC16	hsa-miR-874-3p	0.676599
ASB6	hsa-miR-874-3p	0.674786
PTPN12	hsa-miR-874-3p	0.667144
HEG1	hsa-miR-874-3p	0.662251
SLC30A8	hsa-miR-874-3p	0.651598
IGFBPL1	hsa-miR-874-3p	0.650764
OSTM1	hsa-miR-874-3p	0.650387
USP8	hsa-miR-874-3p	0.645363
HTR2C	hsa-miR-874-3p	0.644301
CPEB4	hsa-miR-874-3p	0.635319
USP46	hsa-miR-874-3p	0.635266
ATG16L1	hsa-miR-874-3p	0.632406
PLEKHB2	hsa-miR-874-3p	0.627808
ATXN1	hsa-miR-874-3p	0.627715
NUFIP2	hsa-miR-874-3p	0.627173
FMNL3	hsa-miR-874-3p	0.616738
PSD3	hsa-miR-874-3p	0.616319
CDK16	hsa-miR-874-3p	0.615159
AQP3	hsa-miR-874-3p	0.613186
CBX7	hsa-miR-874-3p	0.61267
SLC12A5	hsa-miR-874-3p	0.609737
DCUN1D3	hsa-miR-874-3p	0.609532
STRN	hsa-miR-874-3p	0.608793
DYRK2	hsa-miR-874-3p	0.604011
RAB13	hsa-miR-874-3p	0.603959
CNKSR2	hsa-miR-874-3p	0.602334

## Sheet: Figure 4B
Figure 4B. Sequences of 21-23 nt positive and negative vsRNAs at 3' terminus of SARS-CoV-2 genome.
Positive strand						Negative strand
Start	Seq	Strand	Length	Counts		start	seq	strand	length	counts
29498	CAATCCATGAGCAGTGCTGACTC	+	23	7		29503	CATGAGCAGTGCCGACTCAACT	-	22	1
29499	AATCCATGAGCAGTGCTGACTA	+	22	1		29537	TATGCAGACCACACAAGGCAGA	-	22	1
29499	AATCCATGAGCAGTGCTGACTC	+	22	4		29538	ATGCAGACCACACAAGGCAGAT	-	22	1
29500	ATCCATGAGCAGTGCTGACTCAA	+	23	1		29538	ATGCAGACCACACAAGGCAGATG	-	23	2
29500	ATCCATGAGCGGTGCTGACTC	+	21	1		29538	ATGCAGACCACACAAGGCATATG	-	23	1
29502	CCATGAGCAGTGCTGACTCAAC	+	22	1		29538	GTGCAGACCACACAAGGCAGATG	-	23	1
29503	CATGAGCAGTGCTGACTCAAC	+	21	2		29539	TGCAGACCACACAAGGCAGATG	-	22	1
29503	CATGAGCAGTGCTGACTCAACTC	+	23	3		29540	GCAGACCACACAAGGCAGATAG	-	22	1
29505	TGAGCAGAGCTGACTCAACTCAG	+	23	1		29540	GCAGACCACACAAGGCAGATG	-	21	3
29505	TGAGCAGTGCTGACTCAACTC	+	21	1		29540	GCAGACCACACAAGGCAGATGG	-	22	2
29505	TGAGCAGTGCTGACTCAACTCA	+	22	1		29540	TCAGACCACACAAGGCAGATGG	-	22	1
29506	GAGCAGTGCTGACTCAACTCA	+	21	1		29570	AACATTTTCGCTTTTCCGTTT	-	21	1
29506	GAGCAGTGCTGACTCAACTCAG	+	22	1		29575	TTTCGCTTTTCCGTTTACGAT	-	21	1
29506	GAGCAGTGCTGACTCAACTCAGA	+	23	1		29576	TTCGCTTTTCCGTTTACGATATT	-	23	1
29506	GAGCAGTGCTGACTCAACTCAGG	+	23	15		29578	CGCTTTTCCGTTTACGATATAT	-	22	1
29507	AACAGTGCTGACTCAACTCAGG	+	22	1		29578	CGCTTTTCCGTTTACGATATATA	-	23	1
29507	ACCAGTGCTGACTCAACTCAGG	+	22	1		29583	TTCCGTTTACGATATATAGTCT	-	22	1
29507	AGAAGTGCTGACTCAACTCAGG	+	22	2		29583	TTCCGTTTACGATATATAGTCTA	-	23	1
29507	AGAAGTGCTGACTCAACTCAGGC	+	23	1		29588	TTTACGATATATAGTCTACTCT	-	22	1
29507	AGCAATGCTGACTCAACTCAGG	+	22	1		29589	TTACGATATATAGTCTACTCT	-	21	1
29507	AGCAGAGCTGACTCAACTCAG	+	21	2		29594	ATATATAGTCTACTCTTGTGCA	-	22	1
29507	AGCAGAGCTGACTCAACTCAGG	+	22	8		29597	TATAGTCTACTCTTGTGCAGAA	-	22	2
29507	AGCAGAGCTGACTCAACTCAGGC	+	23	4		29598	ATAGTCTACTCTTGTGCAGAAT	-	22	1
29507	AGCAGCGCTGACTCAACTCAGG	+	22	2		29598	ATAGTCTACTCTTGTGCAGAATG	-	23	1
29507	AGCAGGGCTGACTCAACTCAGG	+	22	1		29598	ATAGTCTACTCTTGTGCTGAAT	-	22	1
29507	AGCAGTACTGACTCAACTCAGG	+	22	1		29598	GTAGTCTACTCTTGTGCAGAAT	-	22	1
29507	AGCAGTGCAGACTCAACTCAGG	+	22	1		29598	GTAGTCTACTCTTGTGCAGAATG	-	23	1
29507	AGCAGTGCCGACTCAACTCAGG	+	22	3		29599	AAGTCTACTCTTGTGCAGAAT	-	21	4
29507	AGCAGTGCCGACTCAACTCAGGC	+	23	3		29599	TAGTCTACTCTTGTGCAGAATGA	-	23	1
29507	AGCAGTGCGGACTCAACTCAG	+	21	1		29600	AGTCTACTCTTGTGCAGAATG	-	21	9
29507	AGCAGTGCGGACTCAACTCAGG	+	22	2		29600	AGTCTACTCTTGTGCAGAATGA	-	22	1
29507	AGCAGTGCTAACTCAACTCAGG	+	22	1		29600	AGTCTACTCTTGTGCAGATTG	-	21	1
29507	AGCAGTGCTGACACAACTCAGG	+	22	2		29600	AGTCTACTCTTGTGCTGAATG	-	21	1
29507	AGCAGTGCTGACACAACTCAGGC	+	23	1		29600	GGTCTACTCTTGTGCAGAATG	-	21	1
29507	AGCAGTGCTGACCCAACTCAGG	+	22	5		29600	TGTCTACTCTTGTGCAGAATG	-	21	1
29507	AGCAGTGCTGACCCAACTCAGGC	+	23	1		29617	AATGAATTCTCGTAACTACATA	-	22	2
29507	AGCAGTGCTGACTAAACTCAGG	+	22	1		29617	AGTGAATTCTCGTAACTACATAG	-	23	1
29507	AGCAGTGCTGACTCAAATCAGG	+	22	1		29617	TATGAATTCTCGTAACTACATAG	-	23	1
29507	AGCAGTGCTGACTCAACACAGG	+	22	4		29618	ATGAATTCTCGTAACTACATAG	-	22	6
29507	AGCAGTGCTGACTCAACACAGGC	+	23	1		29618	ATGAATTCTCGTAACTACATAGC	-	23	3
29507	AGCAGTGCTGACTCAACCCAGG	+	22	2		29618	ATGAATTCTCGTAACTACATTG	-	22	1
29507	AGCAGTGCTGACTCAACCCAGGC	+	23	2		29620	GAATTCTCGTAACTACATAGCAC	-	23	1
29507	AGCAGTGCTGACTCAACTCAA	+	21	4		29621	AATTCTCGTAACTACATAGCA	-	21	1
29507	AGCAGTGCTGACTCAACTCAC	+	21	1		29621	AATTCTCGTAACTACATAGCAC	-	22	6
29507	AGCAGTGCTGACTCAACTCACG	+	22	1		29622	ATTCTCGTAACTACATAGCAC	-	21	3
29507	AGCAGTGCTGACTCAACTCAG	+	21	85		29622	ATTCTCGTAACTACATAGCACA	-	22	2
29507	AGCAGTGCTGACTCAACTCAGA	+	22	55		29622	ATTCTCGTAACTACATAGCACAA	-	23	2
29507	AGCAGTGCTGACTCAACTCAGC	+	22	1		29622	ATTCTCGTAACTACATAGCACT	-	22	1
29507	AGCAGTGCTGACTCAACTCAGG	+	22	1115		29622	GTTCTCGTAACTACATAGCAC	-	21	1
29507	AGCAGTGCTGACTCAACTCAGGA	+	23	9		29623	TTCTCGTAACTACATAGCACA	-	21	1
29507	AGCAGTGCTGACTCAACTCAGGC	+	23	234		29623	TTCTCGTAACTACATAGCACAA	-	22	2
29507	AGCAGTGCTGACTCAACTCAGGT	+	23	30		29624	TCTCGTAACTACATAGCACAA	-	21	1
29507	AGCAGTGCTGACTCAACTCAGT	+	22	11		29634	ACATAGCACAAGTAGATGTAGTT	-	23	1
29507	AGCAGTGCTGACTCAACTCCGG	+	22	1		29636	AAAGCACAAGTAGATGTAGTT	-	21	1
29507	AGCAGTGCTGACTCAACTCGGG	+	22	3		29636	AAAGCACAAGTAGATGTAGTTA	-	22	1
29507	AGCAGTGCTGACTCAACTTAG	+	21	1		29636	ATAGCACAAGTAGATGTAGTT	-	21	1
29507	AGCAGTGCTGACTCAACTTAGG	+	22	5		29670	CATAGCAATCTTTAATCAGTG	-	21	2
29507	AGCAGTGCTGACTCACCTCAG	+	21	1
29507	AGCAGTGCTGACTCACCTCAGG	+	22	1
29507	AGCAGTGCTGACTCAGCTCAGG	+	22	5
29507	AGCAGTGCTGACTCAGCTCAGGC	+	23	2
29507	AGCAGTGCTGACTCATCTCAGG	+	22	1
29507	AGCAGTGCTGACTCATCTCAGGC	+	23	2
29507	AGCAGTGCTGACTCGACTCAGG	+	22	2
29507	AGCAGTGCTGACTCGACTCAGGC	+	23	2
29507	AGCAGTGCTGACTCTACTCAGG	+	22	1
29507	AGCAGTGCTGACTTAACTCAGG	+	22	2
29507	AGCAGTGCTGCCTCAACTCAGG	+	22	1
29507	AGCAGTGCTTACTCAACTCAGGC	+	23	1
29507	AGCAGTGTTGACTCAACTCAGG	+	22	1
29507	AGCGGTGCTGACTCAACTCAG	+	21	1
29507	AGCGGTGCTGACTCAACTCAGG	+	22	1
29507	AGCTGTGCTGACTCAACTCAGG	+	22	1
29507	AGGAGTGCTGACTCAACTCAGG	+	22	1
29507	AGTAGTGCTGACTCAACTCAGG	+	22	1
29507	CGCAGTGCTGACTCAACTCAGG	+	22	11
29507	CGCAGTGCTGACTCAACTCAGGC	+	23	2
29507	GGCAGTGCTGACTCAACTCAGG	+	22	6
29507	GGCAGTGCTGACTCAACTCAGGC	+	23	2
29507	TGCAGTGCTGACTCAACTCAGG	+	22	2
29507	TGCAGTGCTGACTCAACTCAGGC	+	23	1
29508	GCAATGCTGACTCAACTCAGGC	+	22	1
29508	GCACTGCTGACTCAACTCAGG	+	21	2
29508	GCAGAGCTGACTCAACTCAGG	+	21	1
29508	GCAGAGCTGACTCAACTCAGGC	+	22	1
29508	GCAGTCCTGACTCAACTCAGG	+	21	1
29508	GCAGTGCAGACTCAACTCAGGC	+	22	1
29508	GCAGTGCTGACCCAACTCAGGC	+	22	1
29508	GCAGTGCTGACTCAAATCAGGC	+	22	1
29508	GCAGTGCTGACTCAACACAGG	+	21	1
29508	GCAGTGCTGACTCAACACAGGC	+	22	1
29508	GCAGTGCTGACTCAACCCAGG	+	21	1
29508	GCAGTGCTGACTCAACTCAGA	+	21	5
29508	GCAGTGCTGACTCAACTCAGG	+	21	73
29508	GCAGTGCTGACTCAACTCAGGA	+	22	2
29508	GCAGTGCTGACTCAACTCAGGC	+	22	41
29508	GCAGTGCTGACTCAACTCAGGCC	+	23	3
29508	GCAGTGCTGACTCAACTCAGGCT	+	23	1
29508	GCAGTGCTGACTCAACTCAGGT	+	22	4
29508	GCAGTGCTGACTCAACTCCGGC	+	22	1
29508	GCAGTGCTGACTCAATTCAGGC	+	22	1
29508	GCAGTGCTGACTCGACTCAGG	+	21	1
29508	GCAGTGCTGCCTCAACTCAGG	+	21	2
29508	GCAGTGCTGCCTCAACTCAGGC	+	22	2
29508	TCAGTGCTGACTCAACTCAGG	+	21	2
29509	CAGTGCTGACTCAACTCAGCC	+	21	1
29509	CAGTGCTGACTCAACTCAGGC	+	21	78
29509	CAGTGCTGACTCAACTCAGGCA	+	22	1
29509	CAGTGCTGACTCAACTCAGGCC	+	22	22
29509	CAGTGCTGACTCAACTCAGGCCC	+	23	2
29509	CAGTGCTGACTCAACTCAGGCCT	+	23	19
29509	CAGTGCTGACTCAACTCAGGCG	+	22	1
29509	CAGTGCTGACTCAACTCAGGCT	+	22	7
29509	CAGTGCTGACTCAACTCAGGT	+	21	14
29509	CAGTGCTGACTCAACTCAGGTC	+	22	1
29509	CAGTGCTGACTCACCTCAGGC	+	21	1
29509	CAGTGCTGACTCACCTCAGGCCT	+	23	1
29509	CTGTGCTGACTCAACTCAGGC	+	21	1
29510	AGTGCTGACTCAACTCAGGCC	+	21	2
29510	AGTGCTGACTCAACTCAGGCCTA	+	23	1
29511	GTGCTGACTCAACTCAGGCCGA	+	22	1
29511	GTGCTGACTCAACTCAGGCCTA	+	22	3
29512	TGCTGACTCAACCCAGGCCTA	+	21	1
29512	TGCTGACTCAACTCAGGCCTA	+	21	1
29512	TGCTGACTCAACTCAGGCCTAA	+	22	1
29512	TGCTGACTCAACTCAGGCCTTA	+	22	2
29513	GCTGACTCAACTCAGGCCTAA	+	21	2
29515	TGACACAACTCAGGCCTAAACTC	+	23	1
29515	TGACTCAACACAGGCCTAAAC	+	21	1
29515	TGACTCAACTCAGGCCTAAACT	+	22	2
29516	GACTCAACTCAGGCCTAAACAC	+	22	1
29516	GACTCAACTCAGGCCTAAACC	+	21	1
29516	GACTCAACTCAGGCCTAAACT	+	21	3
29516	GACTCAACTCAGGCCTAAACTC	+	22	10
29516	GACTCAACTCAGGCCTAAACTCA	+	23	4
29516	GACTCAACTCAGGCCTAAACTT	+	22	1
29516	GACTCAGCTCAGGCCTAAACT	+	21	1
29517	AATCAACTCAGGCCTAAACTC	+	21	1
29517	ACACAACTCAGGCCTAAACTC	+	21	1
29517	ACCCAACTCAGGCCTAAACTC	+	21	1
29517	ACCCAACTCAGGCCTAAACTCAT	+	23	2
29517	ACTAAACTCAGGCCTAAACTC	+	21	2
29517	ACTAAACTCAGGCCTAAACTCA	+	22	2
29517	ACTAAACTCAGGCCTAAACTCAT	+	23	1
29517	ACTCAAATCAGGCCTAAACTCA	+	22	1
29517	ACTCAACACAGGCCTAAACTC	+	21	2
29517	ACTCAACTAAGGCCTAAACTC	+	21	1
29517	ACTCAACTCAAGCCTAAACTC	+	21	1
29517	ACTCAACTCACGCCTAAACTC	+	21	1
29517	ACTCAACTCAGGACTAAACTC	+	21	1
29517	ACTCAACTCAGGCCAAAACTC	+	21	1
29517	ACTCAACTCAGGCCTAAACACAT	+	23	1
29517	ACTCAACTCAGGCCTAAACCCA	+	22	1
29517	ACTCAACTCAGGCCTAAACTC	+	21	202
29517	ACTCAACTCAGGCCTAAACTCA	+	22	139
29517	ACTCAACTCAGGCCTAAACTCAA	+	23	3
29517	ACTCAACTCAGGCCTAAACTCAC	+	23	11
29517	ACTCAACTCAGGCCTAAACTCAG	+	23	2
29517	ACTCAACTCAGGCCTAAACTCAT	+	23	191
29517	ACTCAACTCAGGCCTAAACTCG	+	22	1
29517	ACTCAACTCAGGCCTAAACTCGT	+	23	5
29517	ACTCAACTCAGGCCTAAACTCT	+	22	1
29517	ACTCAACTCAGGCCTAAACTT	+	21	7
29517	ACTCAACTCAGGCCTAAACTTAT	+	23	1
29517	ACTCAACTCAGGCCTAAATTC	+	21	1
29517	ACTCAACTCAGGCCTAGACTC	+	21	1
29517	ACTCAACTCAGGCCTTAACTCAT	+	23	1
29517	ACTCAACTCAGGTCTAAACTCAT	+	23	1
29517	ACTCAACTCATGCCTAAACTC	+	21	1
29517	ACTCAACTCCGGCCTAAACTC	+	21	1
29517	ACTCAACTCGGGCCTAAACTCAT	+	23	1
29517	ACTCAACTTAGGCCTAAACTCA	+	22	1
29517	ACTCAACTTAGGCCTAAACTCAT	+	23	1
29517	ACTCAGCTCAGGCCTAAACTCAT	+	23	3
29517	ACTCGACTCAGGCCTAAACTC	+	21	1
29517	ATTCAACTCAGGCCTAAACTCAT	+	23	1
29517	CCTCAACTCAGGCCTAAACTC	+	21	11
29517	CCTCAACTCAGGCCTAAACTCA	+	22	5
29517	CCTCAACTCAGGCCTAAACTCAT	+	23	6
29517	GCTCAACTCAGGCCTAAACTC	+	21	1
29517	GCTCAACTCAGGCCTAAACTCA	+	22	1
29517	GCTCAACTCAGGCCTAAACTCAT	+	23	5
29518	ATCAACTCAGGCCTAAACTCATG	+	23	3
29518	CACAACTCAGGCCTAAACTCATG	+	23	4
29518	CCCAACTCAGGCCTAAACTCATG	+	23	5
29518	CGCAACTCAGGCCTAAACTCATG	+	23	3
29518	CTCAACACAGGCCTAAACTCATG	+	23	3
29518	CTCAACCCAGGCCTAAACTCATG	+	23	5
29518	CTCAACGCAGGCCTAAACTCATG	+	23	2
29518	CTCAACTAAGGCCTAAACTCATG	+	23	5
29518	CTCAACTCAGACCTAAACTCATG	+	23	2
29518	CTCAACTCAGCCCTAAACTCA	+	21	1
29518	CTCAACTCAGCCCTAAACTCATG	+	23	1
29518	CTCAACTCAGGACTAAACTCATG	+	23	1
29518	CTCAACTCAGGCATAAACTCATG	+	23	2
29518	CTCAACTCAGGCCAAAACTCATG	+	23	7
29518	CTCAACTCAGGCCCAAACTCATG	+	23	3
29518	CTCAACTCAGGCCTAAAATCATG	+	23	1
29518	CTCAACTCAGGCCTAAACACA	+	21	1
29518	CTCAACTCAGGCCTAAACACATG	+	23	6
29518	CTCAACTCAGGCCTAAACCCATG	+	23	3
29518	CTCAACTCAGGCCTAAACTAATG	+	23	4
29518	CTCAACTCAGGCCTAAACTCA	+	21	40
29518	CTCAACTCAGGCCTAAACTCAAG	+	23	5
29518	CTCAACTCAGGCCTAAACTCAC	+	22	2
29518	CTCAACTCAGGCCTAAACTCACG	+	23	5
29518	CTCAACTCAGGCCTAAACTCAT	+	22	52
29518	CTCAACTCAGGCCTAAACTCATA	+	23	68
29518	CTCAACTCAGGCCTAAACTCATC	+	23	6
29518	CTCAACTCAGGCCTAAACTCATG	+	23	1700
29518	CTCAACTCAGGCCTAAACTCATT	+	23	4
29518	CTCAACTCAGGCCTAAACTCG	+	21	1
29518	CTCAACTCAGGCCTAAACTCGTG	+	23	7
29518	CTCAACTCAGGCCTAAACTCTTG	+	23	1
29518	CTCAACTCAGGCCTAAACTTATG	+	23	5
29518	CTCAACTCAGGCCTAAATTCATG	+	23	1
29518	CTCAACTCAGGCCTAACCTCATG	+	23	2
29518	CTCAACTCAGGCCTAAGCTCA	+	21	1
29518	CTCAACTCAGGCCTAAGCTCATG	+	23	7
29518	CTCAACTCAGGCCTAATCTCATG	+	23	1
29518	CTCAACTCAGGCCTACACTCATG	+	23	3
29518	CTCAACTCAGGCCTAGACTCATG	+	23	2
29518	CTCAACTCAGGCCTATACTCATG	+	23	2
29518	CTCAACTCAGGCCTGAACTCATG	+	23	2
29518	CTCAACTCAGGCCTTAACTCATG	+	23	1
29518	CTCAACTCAGGCGTAAACTCATG	+	23	1
29518	CTCAACTCAGGGCTAAACTCATG	+	23	1
29518	CTCAACTCAGTCCTAAACTCATG	+	23	4
29518	CTCAACTCGGGCCTAAACTCATG	+	23	4
29518	CTCAACTTAGGCCTAAACTCATG	+	23	3
29518	CTCAATTCAGGCCTAAACTCATG	+	23	2
29518	CTCACCTCAGGCCTAAACTCATG	+	23	3
29518	CTCAGCTCAGGCCTAAACTCATG	+	23	2
29518	CTCCACTCAGGCCTAAACTCATG	+	23	1
29518	CTCGACTCAGGCCTAAACTCATG	+	23	2
29518	CTCTACTCAGGCCTAAACTCATG	+	23	1
29518	CTTAACTCAGGCCTAAACTCATG	+	23	3
29518	GTCAACTCAGGCCTAAACTCATG	+	23	1
29518	TTCAACTCAGGCCTAAACTCATG	+	23	1
29519	ACAACTCAGGCCTAAACTCATG	+	22	3
29519	ACAACTCAGGCCTAAACTCATGC	+	23	1
29519	GCAACTCAGGCCTAAACTCATG	+	22	1
29519	TCAACACAGGCCTAAACTCATG	+	22	1
29519	TCAACTCAGGCCGAAACTCATG	+	22	1
29519	TCAACTCAGGCCTAAACTCATA	+	22	2
29519	TCAACTCAGGCCTAAACTCATG	+	22	68
29519	TCAACTCAGGCCTAAACTCATGC	+	23	11
29519	TCAACTCAGGCCTAAACTCATT	+	22	1
29519	TCAACTCAGGCCTAAACTTATG	+	22	1
29519	TCAACTCAGGCCTCAACTCATG	+	22	1
29519	TCAACTTAGGCCTAAACTCATG	+	22	1
29520	CAAATCAGGCCTAAACTCATG	+	21	1
29520	CAACACAGGCCTAAACTCATG	+	21	6
29520	CAACTAAGGCCTAAACTCATGC	+	22	1
29520	CAACTCAGCCCTAAACTCATG	+	21	1
29520	CAACTCAGGCCCAAACTCATG	+	21	1
29520	CAACTCAGGCCTAAACCCATG	+	21	1
29520	CAACTCAGGCCTAAACTCAAG	+	21	3
29520	CAACTCAGGCCTAAACTCATA	+	21	8
29520	CAACTCAGGCCTAAACTCATG	+	21	194
29520	CAACTCAGGCCTAAACTCATGC	+	22	23
29520	CAACTCAGGCCTAAACTCATGCA	+	23	2
29520	CAACTCAGGCCTAAACTCATGT	+	22	3
29520	CAACTCAGGCCTAAACTCATT	+	21	2
29520	CAACTCAGGCCTAAACTCGTGC	+	22	2
29520	CAACTCAGGCCTAAACTTATG	+	21	1
29520	CAACTCAGGCCTTAACTCATG	+	21	1
29520	CCACTCAGGCCTAAACTCATG	+	21	1
29520	CGACTCAGGCCTAAACTCATG	+	21	1
29520	CGACTCAGGCCTAAACTCATGC	+	22	1
29521	AACTCAGGCCTAAACTCATGC	+	21	27
29521	AACTCAGGCCTAAACTCATGCA	+	22	8
29521	AACTCAGGCCTAAACTCATGCAA	+	23	1
29521	AACTCAGGCCTAAACTCATGCAG	+	23	27
29521	AACTCAGGCCTAAACTCATGT	+	21	3
29521	AACTCAGGCCTAACCTCATGC	+	21	1
29521	AACTCAGGCCTATACTCATGC	+	21	1
29521	AACTCAGGCCTATACTCATGCAG	+	23	1
29521	AACTCAGGCCTGAACTCATGCA	+	22	1
29522	ACTCAGGCCAAAACTCATGCA	+	21	1
29522	ACTCAGGCCAAAACTCATGCAG	+	22	1
29522	ACTCAGGCCTAAACCCATGCAGA	+	23	1
29522	ACTCAGGCCTAAACTCATGCA	+	21	12
29522	ACTCAGGCCTAAACTCATGCAA	+	22	2
29522	ACTCAGGCCTAAACTCATGCAG	+	22	18
29522	ACTCAGGCCTAAACTCATGCAGA	+	23	31
29522	ACTCAGGCCTAAGCTCATGCA	+	21	1
29522	ACTCAGTCCTAAACTCATGCAGA	+	23	1
29522	CCTCAGGCCTAAACTCATGCAG	+	22	1
29522	CCTCAGGCCTAAACTCATGCAGA	+	23	4
29523	CCCAGGCCTAAACTCATGCAG	+	21	1
29523	CTCAGGCCCAAACTCATGCAG	+	21	1
29523	CTCAGGCCTAAACTCATGCAG	+	21	31
29523	CTCAGGCCTAAACTCATGCAGA	+	22	29
29523	CTCAGGCCTAAACTCATGCAGAC	+	23	2
29523	CTCAGGCCTAAACTCATGCAGAT	+	23	1
29523	CTCAGGCCTAAACTCATGCAGT	+	22	2
29523	CTCAGTCCTAAACTCATGCAGA	+	22	1
29523	CTCTGGCCTAAACTCATGCAG	+	21	2
29523	CTTAGGCCTAAACTCATGCAGA	+	22	1
29524	GCAGGCCTAAACTCATGCAGACC	+	23	1
29524	TCAGGCCTAAACTCATGCAGA	+	21	18
29524	TCAGGCCTAAACTCATGCAGAC	+	22	1
29524	TCAGGCCTAAACTCATGCAGACA	+	23	1
29524	TCAGGCCTAAACTCATGCAGACC	+	23	6
29524	TCAGGCCTAAACTCATGCAGACT	+	23	1
29524	TCAGGCCTAAACTCATGCAGT	+	21	4
29525	CAAGCCTAAACTCATGCAGACC	+	22	1
29525	CAGGCCTAAACTCATGCAGAC	+	21	1
29525	CAGGCCTAAACTCATGCAGACC	+	22	12
29525	CAGGCCTAAACTCATGCAGACCA	+	23	3
29525	CAGGCCTAAACTCATGCAGACT	+	22	2
29525	CAGGCCTAAACTCATGCAGAT	+	21	2
29526	AGGCCTAAACTCATGCAGACC	+	21	7
29528	GCCTAAACTCATGCAGACCAC	+	21	4
29528	GCCTAAACTCATGCAGACCACA	+	22	6
29529	CCTAAACACATGCAGACCACA	+	21	1
29529	CCTAAACTCAAGCAGACCACACA	+	23	1
29529	CCTAAACTCACGCAGACCACA	+	21	2
29529	CCTAAACTCATGAAGACCACA	+	21	1
29529	CCTAAACTCATGCAGACCACA	+	21	94
29529	CCTAAACTCATGCAGACCACAC	+	22	4
29529	CCTAAACTCATGCAGACCACACA	+	23	25
29529	CCTAAACTCATGCAGACCACAT	+	22	1
29529	CCTAAACTCATGCAGACCACG	+	21	2
29529	CCTAAACTCATGCAGACCGCAC	+	22	1
29529	CCTAAACTCATGCAGATCACACA	+	23	2
29529	CCTAAACTCATGCAGCCCACA	+	21	5
29529	CCTAGACTCATGCAGACCACACA	+	23	1
29529	CCTGAACTCATGCAGACCACA	+	21	1
29529	CCTTAACTCATGCAGACCACA	+	21	1
29529	CCTTAACTCATGCAGACCACACA	+	23	1
29530	CTAAACTCAAGCAGACCACACA	+	22	1
29530	CTAAACTCATGCAGACCACACA	+	22	19
29530	CTAAACTCATGCAGACCACACAA	+	23	2
29530	CTAAACTCATGCAGACCACACC	+	22	1
29530	CTAAACTCATGCAGACCACCCA	+	22	1
29530	CTAAACTCATGCCGACCACACA	+	22	1
29531	TAAACTCATGCAGACCACACAA	+	22	7
29531	TAAACTCATGCAGACCACACAAA	+	23	2
29531	TAAACTCATGCAGACCACACAAG	+	23	17
29532	AAACTCAAGCAGACCACACAAGG	+	23	2
29532	AAACTCATCCAGACCACACAAGG	+	23	1
29532	AAACTCATGCAGACCACACAAG	+	22	18
29532	AAACTCATGCAGACCACACAAGA	+	23	1
29532	AAACTCATGCAGACCACACAAGG	+	23	43
29532	AAACTCATGCAGACCGCACAAG	+	22	2
29532	AAACTCATGCAGACCTCACAAGG	+	23	1
29532	AAACTCATGCAGCCCACACAAGG	+	23	1
29532	AAACTCATGCATACCACACAAGG	+	23	1
29532	AAGCTCATGCAGACCACACAAGG	+	23	1
29532	AGACTCATGCAGACCACACAAG	+	22	1
29532	AGACTCATGCAGACCACACAAGG	+	23	1
29532	ATACTCATGCAGACCACACAAGG	+	23	1
29532	GAACTCATGCAGACCACACAAGG	+	23	1
29533	AACTCACGCAGACCACACAAG	+	21	1
29533	AACTCACGCAGACCACACAAGG	+	22	1
29533	AACTCACGCAGACCACACAAGGC	+	23	1
29533	AACTCATGCAGACCACACAAG	+	21	22
29533	AACTCATGCAGACCACACAAGG	+	22	45
29533	AACTCATGCAGACCACACAAGGA	+	23	1
29533	AACTCATGCAGACCACACAAGGC	+	23	4
29533	AACTCATGCAGACCACACAAGGT	+	23	2
29533	AACTCATGCAGACCACACAAGT	+	22	1
29533	AACTCATGCAGCCCACACAAGG	+	22	1
29533	AACTCATGCAGGCCACACAAGG	+	22	1
29533	AACTCATGTAGACCACACAAGG	+	22	1
29533	AACTCTTGCAGACCACACAAG	+	21	1
29534	ACTCAAGCAGACCACACAAGGC	+	22	1
29534	ACTCATGCAGACCACACAAGG	+	21	5
29534	ACTCATGCAGACCACACAAGGCA	+	23	2
29535	CTCATGCAGACCACACAAGGC	+	21	3
29535	CTCATGCAGACCACACAAGGCA	+	22	1
29535	CTCATGCAGACCACACAAGGCAG	+	23	1
29537	CATGCAGACCACACAAGGCAGAT	+	23	2
29538	ATGCAGACCACACAAGGCAGA	+	21	1
29538	ATGCAGACCACACAAGGCAGATG	+	23	6
29539	TGCAGACCACACAAGGCAGATG	+	22	3
29539	TGCAGACCACACAAGGCAGATGG	+	23	2
29540	GCAGACCACACAAGGCAGATA	+	21	1
29540	GCAGACCACACAAGGCAGATG	+	21	5
29540	GCAGACCACACAAGGCAGATGA	+	22	1
29540	GCAGACCACACAAGGCAGATGG	+	22	5
29540	GCAGACCACACAAGGCAGATGGG	+	23	2
29541	CAAACCACACAAGGCAGATGGGC	+	23	1
29541	CACACCACACAAGGCAGATGGG	+	22	1
29541	CACACCACACAAGGCAGATGGGC	+	23	1
29541	CAGACAACACAAGGCAGATGGGC	+	23	3
29541	CAGACCACACAAGGCACATGGGC	+	23	1
29541	CAGACCACACAAGGCAGATGA	+	21	1
29541	CAGACCACACAAGGCAGATGGA	+	22	1
29541	CAGACCACACAAGGCAGATGGCC	+	23	1
29541	CAGACCACACAAGGCAGATGGG	+	22	54
29541	CAGACCACACAAGGCAGATGGGA	+	23	1
29541	CAGACCACACAAGGCAGATGGGC	+	23	82
29541	CAGACCACACAAGGCAGATGGGT	+	23	9
29541	CAGACCACACAAGGCAGATGGT	+	22	1
29541	CAGACCACACAAGGCAGATGT	+	21	1
29541	CAGACCACACAAGGCAGATGTG	+	22	1
29541	CAGACCACACAAGGCGGATGGGC	+	23	1
29541	CAGACCACACATGGCAGATGG	+	21	1
29541	CAGACTACACAAGGCAGATGGGC	+	23	1
29541	CAGTCCACACAAGGCAGATGGG	+	22	1
29541	CCGACCACACAAGGCAGATGG	+	21	1
29542	AGACCACACAAGGCAGATGGGC	+	22	3
29542	AGACCACACAAGGCAGATGGGCT	+	23	2
29543	GACCACACAAGGCAGATGGGCC	+	22	1
29543	GACCACACAAGGCAGATGGGCT	+	22	1
29543	GACCACACAAGGCAGATGGGCTA	+	23	2
29544	ACCACACAAGCCAGATGGGCT	+	21	1
29544	ACCACACAAGGCAGAAGGGCT	+	21	1
29544	ACCACACAAGGCAGATGGGCA	+	21	1
29544	ACCACACAAGGCAGATGGGCG	+	21	1
29544	ACCACACAAGGCAGATGGGCT	+	21	21
29544	ACCACACAAGGCAGATGGGCTA	+	22	12
29544	ACCACACAAGGCAGATGGGCTAT	+	23	12
29544	ACCACACAAGGCAGATGGGCTG	+	22	1
29544	ACCACGCAAGGCAGATGGGCT	+	21	1
29544	CCCACACAAGGCAGATGGGCT	+	21	1
29544	CCCACACAAGGCAGATGGGCTA	+	22	4
29545	CCACACAAGGCAGATGGGCTA	+	21	10
29545	CCACACAAGGCAGATGGGCTAC	+	22	2
29545	CCACACAAGGCAGATGGGCTAT	+	22	14
29545	CCACACAAGGCAGATGGGCTATA	+	23	24
29545	CCACACAAGGCAGATGGGCTTT	+	22	2
29545	CCACACAAGGCAGATGTGCTAT	+	22	1
29546	CACACAAGGCAGATGGGCTAC	+	21	1
29546	CACACAAGGCAGATGGGCTAG	+	21	1
29546	CACACAAGGCAGATGGGCTAT	+	21	19
29546	CACACAAGGCAGATGGGCTATA	+	22	22
29546	CACACAAGGCAGATGGGCTATAA	+	23	1
29546	CACACAAGGCAGATGGGCTATAC	+	23	1
29546	CACACAAGGCAGATGGGCTATAT	+	23	7
29546	CACACAAGGCAGGTGGGCTATAT	+	23	1
29546	CACACAAGGGAGATGGGCTAT	+	21	1
29546	TACACAAGGCAGATGGGCTATA	+	22	1
29547	ACACAAGGAAGATGGGCTATAT	+	22	1
29547	ACACAAGGCACATGGGCTATAT	+	22	1
29547	ACACAAGGCAGATGGGCCATATA	+	23	1
29547	ACACAAGGCAGATGGGCTATA	+	21	22
29547	ACACAAGGCAGATGGGCTATAT	+	22	7
29547	ACACAAGGCAGATGGGCTATATA	+	23	5
29547	ACACAAGGCAGATGGGCTATT	+	21	1
29547	ACACAAGGCAGATGGTCTATAT	+	22	1
29547	ATACAAGGCAGATGGGCTATA	+	21	1
29547	CCACAAGGCAGATGGGCTATA	+	21	1
29548	CACAAGGCAGAAGGGCTATAT	+	21	1
29548	CACAAGGCAGATGGGCTATAT	+	21	25
29548	CACAAGGCAGATGGGCTATATA	+	22	59
29548	CACAAGGCAGATGGGCTATATAA	+	23	5
29548	CACAAGGCAGATGGGCTATATAT	+	23	3
29548	CACAAGGCAGATGGGCTATATT	+	22	5
29548	CACAAGGCAGATGGGCTATTT	+	21	3
29548	CACTAGGCAGATGGGCTATATA	+	22	2
29548	CCCAAGGCAGATGGGCTATATA	+	22	1
29549	ACAAGGCAGATGGGCCATATA	+	21	1
29549	ACAAGGCAGATGGGCTACATA	+	21	1
29549	ACAAGGCAGATGGGCTATATA	+	21	9
29549	GCAAGGCAGATGGGCTATATA	+	21	1
29550	CAAGGCAGATGGGCTATATAAA	+	22	5
29550	CAAGGCAGATGGGCTATATAAAC	+	23	12
29551	AAGGCAGATGGGCTATATAAA	+	21	2
29551	AAGGCAGATGGGCTATATAAACA	+	23	6
29552	AGGCAGATGGGCTATATAAAC	+	21	2
29552	AGGCAGATGGGCTATATAAACA	+	22	10
29552	AGGCAGATGGGCTATATAAACAT	+	23	1
29553	GGCAGATGGGCTATATAAACA	+	21	7
29553	GGCAGATGGGCTATATAAACAT	+	22	7
29554	GCAGATGGGCTATATAAACAT	+	21	8
29554	GCAGATGGGCTATATAAACATT	+	22	5
29554	GCAGATGGGCTATATAAACATTT	+	23	9
29555	CAGATGGGCTATATAAACATT	+	21	32
29555	CAGATGGGCTATATAAACATTT	+	22	30
29555	CAGATGGGCTATATAAACATTTT	+	23	11
29556	AGATGGGCTATATAAACATTT	+	21	3
29557	GATGGGCTATATAAACATTTTCG	+	23	6
29558	ATGGGCTATATAAACATTTTC	+	21	3
29558	ATGGGCTATATAAACATTTTCG	+	22	21
29558	ATGGGCTATATAAACATTTTCGC	+	23	1
29559	TGGGCTATATAAACATTTTCG	+	21	5
29559	TGGGCTATATAAACATTTTCGC	+	22	3
29559	TGGGCTATATAAACATTTTCGCT	+	23	6
29560	GGGCTATATAAACATTTTCGC	+	21	1
29563	CTATATAAACATTTTCGCTTT	+	21	4
29563	CTATATAAACATTTTCGCTTTTC	+	23	1
29564	TATATAAACATTTTCGCTTTTCC	+	23	1
29565	ATATAAACATTTTCGCTTTTCC	+	22	2
29565	ATATAAACATTTTCGCTTTTCCG	+	23	6
29566	TATAAACATTTTCGCTTTTCCG	+	22	5
29566	TATAAACATTTTCGCTTTTCCGT	+	23	7
29567	ATAAACATTTTCGCTTTTCCG	+	21	6
29567	ATAAACATTTTCGCTTTTCCGT	+	22	6
29567	ATAAACATTTTCGCTTTTCCGTT	+	23	32
29568	TAAACATTTTCGCTTTTCCGT	+	21	8
29568	TAAACATTTTCGCTTTTCCGTT	+	22	27
29568	TAAACATTTTCGCTTTTCCGTTT	+	23	7
29569	AAACATTTTCGCTTTTCCGTT	+	21	13
29569	AAACATTTTCGCTTTTCCGTTT	+	22	8
29569	AAACATTTTCGCTTTTCCGTTTA	+	23	7
29570	AACATTTTCGCTTTTCCGTTT	+	21	35
29570	AACATTTTCGCTTTTCCGTTTA	+	22	39
29570	AACATTTTCGCTTTTCCGTTTAC	+	23	6
29571	ACATTTTCGCTTTTCCGTTTA	+	21	8
29571	ACATTTTCGCTTTTCCGTTTAC	+	22	5
29571	ACATTTTCGCTTTTCCGTTTACG	+	23	18
29572	CATTTTCGCTTTTCCGTTTAC	+	21	6
29572	CATTTTCGCTTTTCCGTTTACG	+	22	25
29572	CATTTTCGCTTTTCCGTTTACGA	+	23	30
29572	CTTTTTCGCTTTTCCGTTTACGA	+	23	1
29573	ATTTTCGCTTTTCCGTTTACG	+	21	2
29573	ATTTTCGCTTTTCCGTTTACGA	+	22	3
29573	ATTTTCGCTTTTCCGTTTACGAT	+	23	1
29574	ATTTCGCTTTTCCGTTTACGA	+	21	1
29574	TTTTCGCTTTTCCGTTTACGA	+	21	6
29574	TTTTCGCTTTTCCGTTTACGAT	+	22	1
29574	TTTTCGCTTTTCCGTTTACGATA	+	23	11
29574	TTTTCGCTTTTCCGTTTGCGATA	+	23	1
29575	TTTCGCTTTTCCGTTTACGATA	+	22	1
29575	TTTCGCTTTTCCGTTTACGATAT	+	23	2
29576	TTCGCTTTTCCGTTTACGATA	+	21	1
29576	TTCGCTTTTCCGTTTACGATATA	+	23	1
29577	TCGCTTTTCCGTTTACGATAT	+	21	2
29577	TCGCTTTTCCGTTTACGATATA	+	22	1
29577	TCGCTTTTCCGTTTACGATATAC	+	23	1
29577	TCGCTTTTCCGTTTACGATATAT	+	23	1
29578	CGCTTTTCCGTTTACGATATA	+	21	6
29578	CGCTTTTCCGTTTACGATATAT	+	22	2
29578	CGCTTTTCCGTTTACGATATATA	+	23	1
29579	GCTTTTCCGTATACGATATAT	+	21	1
29579	GCTTTTCCGTTTACGATATAT	+	21	4
29579	GCTTTTCCGTTTACGATATATA	+	22	2
29580	CTTTTCCGTTTACGATATATA	+	21	16
29580	CTTTTCCGTTTACGATATATAGC	+	23	1
29580	CTTTTCCGTTTACGATATATAGT	+	23	11
29581	TTTTACGTTTACGATATATAGTC	+	23	1
29581	TTTTCCGTTTACGATATATAGT	+	22	3
29581	TTTTCCGTTTACGATATATAGTC	+	23	1
29582	ATTCCGTTTACGATATATAGTCT	+	23	1
29582	TTCCCGTTTACGATATATAGTC	+	22	1
29582	TTTCCGTTTACGATATATAGT	+	21	1
29582	TTTCCGTTTACGATATATAGTC	+	22	1
29582	TTTCCGTTTACGATATATAGTCC	+	23	2
29582	TTTCCGTTTACGATATATAGTCG	+	23	1
29582	TTTCCGTTTACGATATATAGTCT	+	23	23
29583	ATCCGTTTACGATATATAGTCT	+	22	1
29583	CTCCGTTTACGATATATAGTCT	+	22	1
29583	TTCCGATTACGATATATAGTCT	+	22	1
29583	TTCCGTTTACGATATATAGTC	+	21	2
29583	TTCCGTTTACGATATATAGTCC	+	22	1
29583	TTCCGTTTACGATATATAGTCT	+	22	20
29583	TTCCGTTTACGATATATAGTCTA	+	23	1
29584	TCCGATTACGATATATAGTCT	+	21	1
29584	TCCGTTTACGATATATAGTCC	+	21	2
29584	TCCGTTTACGATATATAGTCT	+	21	8
29584	TCCGTTTACGATATATAGTCTA	+	22	5
29585	CCGTTTACGATATATAGTCTA	+	21	10
29585	CCGTTTACGATATATAGTCTAC	+	22	1
29585	CCGTTTACGATATATAGTCTACT	+	23	4
29586	CGTTTACGATATATAGTCTAC	+	21	1
29586	CGTTTACGATATATAGTCTACC	+	22	1
29586	CGTTTACGATATATAGTCTACT	+	22	5
29586	CGTTTACGATATATAGTCTACTC	+	23	3
29586	CGTTTACGATATATAGTCTGCT	+	22	1
29587	GTTTACGATATATAGTCTACT	+	21	1
29587	GTTTACGATATATAGTCTACTCT	+	23	1
29588	ATTACGATATATAGTCTACTCTT	+	23	3
29588	TTTACGATATACAGTCTACTCTT	+	23	1
29588	TTTACGATATATAGTCTACTC	+	21	1
29588	TTTACGATATATAGTCTACTCA	+	22	1
29588	TTTACGATATATAGTCTACTCC	+	22	3
29588	TTTACGATATATAGTCTACTCT	+	22	21
29588	TTTACGATATATAGTCTACTCTT	+	23	25
29588	TTTATGATATATAGTCTACTCT	+	22	1
29589	TTACGATATATAGTCTACCCT	+	21	1
29589	TTACGATATATAGTCTACTCA	+	21	1
29589	TTACGATATATAGTCTACTCG	+	21	1
29589	TTACGATATATAGTCTACTCT	+	21	7
29589	TTACGATATATAGTCTACTCTT	+	22	3
29589	TTACGATATATAGTCTACTCTTA	+	23	1
29589	TTACGATATATAGTCTACTCTTG	+	23	28
29590	AACGATATATAGTCTACTCTTG	+	22	2
29590	AACGATATATAGTCTACTCTTGT	+	23	4
29590	GACGATATATAGTCTACTCTTG	+	22	1
29590	TAAGATATATAGTCTACTCTTG	+	22	1
29590	TACGAAATATAGTCTACTCTT	+	21	1
29590	TACGAAATATAGTCTACTCTTG	+	22	1
29590	TACGAAATATAGTCTACTCTTGT	+	23	2
29590	TACGACATATAGTCTACTCTTGT	+	23	1
29590	TACGATAAATAGTCTACTCTTGT	+	23	1
29590	TACGATATAAAGTCTACTCTTG	+	22	1
29590	TACGATATATACTCTACTCTTG	+	22	1
29590	TACGATATATAGACTACTCTTG	+	22	1
29590	TACGATATATAGCCTACTCTTG	+	22	1
29590	TACGATATATAGCCTACTCTTGT	+	23	1
29590	TACGATATATAGTCCACTCTT	+	21	1
29590	TACGATATATAGTCGACTCTTGT	+	23	2
29590	TACGATATATAGTCTACACTTGT	+	23	2
29590	TACGATATATAGTCTACCCTT	+	21	1
29590	TACGATATATAGTCTACCCTTG	+	22	1
29590	TACGATATATAGTCTACTCCTGT	+	23	1
29590	TACGATATATAGTCTACTCTAG	+	22	1
29590	TACGATATATAGTCTACTCTT	+	21	35
29590	TACGATATATAGTCTACTCTTA	+	22	7
29590	TACGATATATAGTCTACTCTTAT	+	23	2
29590	TACGATATATAGTCTACTCTTG	+	22	150
29590	TACGATATATAGTCTACTCTTGA	+	23	5
29590	TACGATATATAGTCTACTCTTGC	+	23	16
29590	TACGATATATAGTCTACTCTTGT	+	23	191
29590	TACGATATATAGTCTACTCTTTT	+	23	1
29590	TACGATATATAGTCTGCTCTT	+	21	1
29590	TACGATATGTAGTCTACTCTTG	+	22	1
29590	TACGATGTATAGTCTACTCTTG	+	22	1
29590	TATGATATATAGTCTACTCTTGT	+	23	1
29590	TGCGATATATAGTCTACTCTTG	+	22	2
29590	TGCGATATATAGTCTACTCTTGT	+	23	1
29591	ACAATATATAGTCTACTCTTG	+	21	2
29591	ACAATATATAGTCTACTCTTGTG	+	23	2
29591	ACCATATATAGTCTACTCTTGT	+	22	1
29591	ACGAAATATAGTCTACTCTTG	+	21	9
29591	ACGAAATATAGTCTACTCTTGT	+	22	6
29591	ACGAAATATAGTCTACTCTTGTG	+	23	27
29591	ACGACATATAGTCTACTCTTG	+	21	1
29591	ACGAGATATAGTCTACTCTTGTG	+	23	1
29591	ACGATAAATAGTCTACTCTTGT	+	22	2
29591	ACGATAAATAGTCTACTCTTGTG	+	23	6
29591	ACGATACATAGTCTACTCTTGT	+	22	1
29591	ACGATACATAGTCTACTCTTGTG	+	23	3
29591	ACGATATAAAGTCTACTCTTG	+	21	6
29591	ACGATATAAAGTCTACTCTTGTG	+	23	7
29591	ACGATATACAGTCTACTCTTGTG	+	23	3
29591	ACGATATATAATCTACTCTTGTG	+	23	1
29591	ACGATATATAGACTACTCTTGT	+	22	1
29591	ACGATATATAGACTACTCTTGTG	+	23	2
29591	ACGATATATAGCCTACTCTTG	+	21	2
29591	ACGATATATAGCCTACTCTTGT	+	22	1
29591	ACGATATATAGCCTACTCTTGTG	+	23	2
29591	ACGATATATAGGCTACTCTTGTG	+	23	1
29591	ACGATATATAGTCAACTCTTG	+	21	2
29591	ACGATATATAGTCAACTCTTGTG	+	23	3
29591	ACGATATATAGTCCACTCTTGTG	+	23	4
29591	ACGATATATAGTCGACTCTTG	+	21	1
29591	ACGATATATAGTCTAATCTTG	+	21	1
29591	ACGATATATAGTCTAATCTTGT	+	22	1
29591	ACGATATATAGTCTAATCTTGTG	+	23	1
29591	ACGATATATAGTCTACACTTG	+	21	1
29591	ACGATATATAGTCTACCCTTG	+	21	1
29591	ACGATATATAGTCTACCCTTGTG	+	23	5
29591	ACGATATATAGTCTACTATTGTG	+	23	2
29591	ACGATATATAGTCTACTCATG	+	21	2
29591	ACGATATATAGTCTACTCATGT	+	22	1
29591	ACGATATATAGTCTACTCATGTG	+	23	1
29591	ACGATATATAGTCTACTCCTGTG	+	23	5
29591	ACGATATATAGTCTACTCGTGTG	+	23	2
29591	ACGATATATAGTCTACTCTAGT	+	22	1
29591	ACGATATATAGTCTACTCTCG	+	21	1
29591	ACGATATATAGTCTACTCTCGTG	+	23	2
29591	ACGATATATAGTCTACTCTTA	+	21	10
29591	ACGATATATAGTCTACTCTTCT	+	22	1
29591	ACGATATATAGTCTACTCTTG	+	21	462
29591	ACGATATATAGTCTACTCTTGA	+	22	5
29591	ACGATATATAGTCTACTCTTGAG	+	23	4
29591	ACGATATATAGTCTACTCTTGC	+	22	16
29591	ACGATATATAGTCTACTCTTGCG	+	23	4
29591	ACGATATATAGTCTACTCTTGG	+	22	2
29591	ACGATATATAGTCTACTCTTGGG	+	23	2
29591	ACGATATATAGTCTACTCTTGT	+	22	330
29591	ACGATATATAGTCTACTCTTGTA	+	23	51
29591	ACGATATATAGTCTACTCTTGTC	+	23	1
29591	ACGATATATAGTCTACTCTTGTG	+	23	1334
29591	ACGATATATAGTCTACTCTTGTT	+	23	4
29591	ACGATATATAGTCTACTCTTT	+	21	2
29591	ACGATATATAGTCTACTCTTTT	+	22	1
29591	ACGATATATAGTCTACTCTTTTG	+	23	1
29591	ACGATATATAGTCTACTGTTGTG	+	23	1
29591	ACGATATATAGTCTACTTTTGTG	+	23	1
29591	ACGATATATAGTCTATTCTTGTG	+	23	2
29591	ACGATATATAGTCTGCTCTTGTG	+	23	4
29591	ACGATATATAGTCTTCTCTTGT	+	22	1
29591	ACGATATATGGTCTACTCTTG	+	21	1
29591	ACGATATATGGTCTACTCTTGT	+	22	2
29591	ACGATATATGGTCTACTCTTGTG	+	23	2
29591	ACGATATATTGTCTACTCTTG	+	21	2
29591	ACGATATATTGTCTACTCTTGTG	+	23	1
29591	ACGATATGTAGTCTACTCTTG	+	21	1
29591	ACGATATGTAGTCTACTCTTGTG	+	23	1
29591	ACGATGTATAGTCTACTCTTGT	+	22	5
29591	ACGATGTATAGTCTACTCTTGTG	+	23	1
29591	ACGGTATATAGTCTACTCTTG	+	21	1
29591	ACGGTATATAGTCTACTCTTGTG	+	23	6
29591	AGGATATATAGTCTACTCTTGTG	+	23	1
29591	ATGATATATAGTCTACTCTTG	+	21	1
29591	ATGATATATAGTCTACTCTTGTG	+	23	2
29591	CCGATATATAGTCTACTCTTG	+	21	5
29591	CCGATATATAGTCTACTCTTGT	+	22	3
29591	CCGATATATAGTCTACTCTTGTG	+	23	19
29591	GCGATATATAGTCTACTCTTG	+	21	1
29591	GCGATATATAGTCTACTCTTGT	+	22	2
29591	GCGATATATAGTCTACTCTTGTG	+	23	8
29591	TCGATATATAGTCTACTCTTG	+	21	1
29591	TCGATATATAGTCTACTCTTGTG	+	23	3
29592	AGATATATAGTCTACTCTTGT	+	21	1
29592	AGATATATAGTCTACTCTTGTG	+	22	3
29592	CAATATATAGTCTACTCTTGT	+	21	2
29592	CAATATATAGTCTACTCTTGTG	+	22	6
29592	CCATATATAGTCTACTCTTGT	+	21	1
29592	CGAAATATAGTCTACTCTTGT	+	21	1
29592	CGAAATATAGTCTACTCTTGTG	+	22	11
29592	CGACATATAGTCTACTCTTGTG	+	22	1
29592	CGATAAATAGTCTACTCTTGT	+	21	7
29592	CGATAAATAGTCTACTCTTGTG	+	22	10
29592	CGATAAATAGTCTACTCTTGTGC	+	23	1
29592	CGATACATAGTCTACTCTTGTG	+	22	7
29592	CGATAGATAGTCTACTCTTGTG	+	22	1
29592	CGATATAAAGTCTACTCTTGT	+	21	2
29592	CGATATAAAGTCTACTCTTGTG	+	22	12
29592	CGATATAAAGTCTACTCTTGTGC	+	23	1
29592	CGATATACAGTCTACTCTTGTG	+	22	4
29592	CGATATATACTCTACTCTTGTG	+	22	1
29592	CGATATATAGACTACTCTTGT	+	21	2
29592	CGATATATAGACTACTCTTGTG	+	22	8
29592	CGATATATAGACTACTCTTGTGC	+	23	2
29592	CGATATATAGCCTACTCTTGT	+	21	1
29592	CGATATATAGCCTACTCTTGTG	+	22	9
29592	CGATATATAGCCTACTCTTGTGC	+	23	3
29592	CGATATATAGTATACTCTTGTG	+	22	2
29592	CGATATATAGTCAACTCTTGTG	+	22	3
29592	CGATATATAGTCCACTCTTGT	+	21	2
29592	CGATATATAGTCCACTCTTGTG	+	22	3
29592	CGATATATAGTCGACTCTTGTG	+	22	2
29592	CGATATATAGTCTAATCTTGTG	+	22	1
29592	CGATATATAGTCTACACTTGTG	+	22	5
29592	CGATATATAGTCTACACTTGTGC	+	23	2
29592	CGATATATAGTCTACCCTTGT	+	21	2
29592	CGATATATAGTCTACCCTTGTG	+	22	4
29592	CGATATATAGTCTACCCTTGTGC	+	23	1
29592	CGATATATAGTCTACGCTTGTG	+	22	3
29592	CGATATATAGTCTACTATTGTG	+	22	1
29592	CGATATATAGTCTACTCATGT	+	21	2
29592	CGATATATAGTCTACTCATGTG	+	22	10
29592	CGATATATAGTCTACTCATGTGC	+	23	1
29592	CGATATATAGTCTACTCCTGT	+	21	2
29592	CGATATATAGTCTACTCCTGTG	+	22	4
29592	CGATATATAGTCTACTCTAGTG	+	22	6
29592	CGATATATAGTCTACTCTCGT	+	21	2
29592	CGATATATAGTCTACTCTCGTG	+	22	6
29592	CGATATATAGTCTACTCTCGTGC	+	23	2
29592	CGATATATAGTCTACTCTGGT	+	21	1
29592	CGATATATAGTCTACTCTGGTG	+	22	2
29592	CGATATATAGTCTACTCTTAT	+	21	1
29592	CGATATATAGTCTACTCTTATG	+	22	1
29592	CGATATATAGTCTACTCTTCT	+	21	1
29592	CGATATATAGTCTACTCTTCTG	+	22	3
29592	CGATATATAGTCTACTCTTGA	+	21	5
29592	CGATATATAGTCTACTCTTGAG	+	22	3
29592	CGATATATAGTCTACTCTTGAGC	+	23	1
29592	CGATATATAGTCTACTCTTGC	+	21	36
29592	CGATATATAGTCTACTCTTGCG	+	22	8
29592	CGATATATAGTCTACTCTTGCGC	+	23	2
29592	CGATATATAGTCTACTCTTGG	+	21	4
29592	CGATATATAGTCTACTCTTGGG	+	22	5
29592	CGATATATAGTCTACTCTTGT	+	21	651
29592	CGATATATAGTCTACTCTTGTA	+	22	131
29592	CGATATATAGTCTACTCTTGTC	+	22	4
29592	CGATATATAGTCTACTCTTGTCC	+	23	1
29592	CGATATATAGTCTACTCTTGTG	+	22	2237
29592	CGATATATAGTCTACTCTTGTGA	+	23	12
29592	CGATATATAGTCTACTCTTGTGC	+	23	460
29592	CGATATATAGTCTACTCTTGTGG	+	23	4
29592	CGATATATAGTCTACTCTTGTGT	+	23	78
29592	CGATATATAGTCTACTCTTGTT	+	22	15
29592	CGATATATAGTCTACTCTTTT	+	21	1
29592	CGATATATAGTCTACTCTTTTG	+	22	2
29592	CGATATATAGTCTACTGTTGT	+	21	1
29592	CGATATATAGTCTACTGTTGTG	+	22	1
29592	CGATATATAGTCTACTTTTGTG	+	22	1
29592	CGATATATAGTCTATTCTTGTG	+	22	1
29592	CGATATATAGTCTCCTCTTGTG	+	22	1
29592	CGATATATAGTCTCCTCTTGTGC	+	23	1
29592	CGATATATAGTCTGCTCTTGTG	+	22	2
29592	CGATATATAGTCTTCTCTTGTG	+	22	1
29592	CGATATATATTCTACTCTTGTG	+	22	1
29592	CGATATATGGTCTACTCTTGT	+	21	1
29592	CGATATATGGTCTACTCTTGTG	+	22	4
29592	CGATATATGGTCTACTCTTGTGC	+	23	2
29592	CGATATATTGTCTACTCTTGTG	+	22	3
29592	CGATATATTGTCTACTCTTGTGC	+	23	1
29592	CGATATCTAGTCTACTCTTGT	+	21	1
29592	CGATATGTAGTCTACTCTTGTG	+	22	5
29592	CGATATGTAGTCTACTCTTGTGC	+	23	2
29592	CGATATTTAGTCTACTCTTGTG	+	22	1
29592	CGATATTTAGTCTACTCTTGTGC	+	23	1
29592	CGATGTATAGTCTACTCTTGTG	+	22	6
29592	CGATTTATAGTCTACTCTTGT	+	21	1
29592	CGATTTATAGTCTACTCTTGTG	+	22	2
29592	CGATTTATAGTCTACTCTTGTGC	+	23	1
29592	CGGTATATAGTCTACTCTTGT	+	21	1
29592	CGGTATATAGTCTACTCTTGTG	+	22	4
29592	CGGTATATAGTCTACTCTTGTGC	+	23	1
29592	CGTTATATAGTCTACTCTTGTG	+	22	4
29592	GGATATATAGTCTACTCTTGTG	+	22	2
29592	TGATATATAGTCTACTCTTGTG	+	22	4
29592	TGATATATAGTCTACTCTTGTGC	+	23	3
29593	AATATATAGTCTACTCTTGTGC	+	22	1
29593	GATAAATAGTCTACTCTTGTG	+	21	1
29593	GATAAATAGTCTACTCTTGTGC	+	22	1
29593	GATATATAGTCAACTCTTGTGCA	+	23	1
29593	GATATATAGTCTACTCTTATGC	+	22	2
29593	GATATATAGTCTACTCTTGGG	+	21	1
29593	GATATATAGTCTACTCTTGTC	+	21	1
29593	GATATATAGTCTACTCTTGTG	+	21	19
29593	GATATATAGTCTACTCTTGTGC	+	22	23
29593	GATATATAGTCTACTCTTGTGCA	+	23	9
29593	GATATATAGTCTACTCTTGTGT	+	22	1
29594	AGATATAGTCTACTCTTGTGC	+	21	1
29594	ATAAATAGTCTACTCTTGTGC	+	21	3
29594	ATAAATAGTCTACTCTTGTGCAG	+	23	1
29594	ATACATAGTCTACTCTTGTGCA	+	22	1
29594	ATAGATAGTCTACTCTTGTGC	+	21	1
29594	ATATAAAGTCTACTCTTGTGC	+	21	1
29594	ATATAAAGTCTACTCTTGTGCA	+	22	1
29594	ATATAAAGTCTACTCTTGTGCAG	+	23	3
29594	ATATATACTCTACTCTTGTGCA	+	22	1
29594	ATATATAGACTACTCTTGTGC	+	21	1
29594	ATATATAGACTACTCTTGTGCAG	+	23	1
29594	ATATATAGCCTACTCTTGTGCAG	+	23	1
29594	ATATATAGTCAACTCTTGTGC	+	21	2
29594	ATATATAGTCTAATCTTGTGCAG	+	23	1
29594	ATATATAGTCTACACTTGTGCAG	+	23	1
29594	ATATATAGTCTACCCTTGTGC	+	21	1
29594	ATATATAGTCTACTCATGTGC	+	21	1
29594	ATATATAGTCTACTCTAGTGCA	+	22	1
29594	ATATATAGTCTACTCTTGCGC	+	21	2
29594	ATATATAGTCTACTCTTGCGCA	+	22	1
29594	ATATATAGTCTACTCTTGCGCAG	+	23	1
29594	ATATATAGTCTACTCTTGTACA	+	22	1
29594	ATATATAGTCTACTCTTGTCCA	+	22	1
29594	ATATATAGTCTACTCTTGTCCAG	+	23	1
29594	ATATATAGTCTACTCTTGTGA	+	21	5
29594	ATATATAGTCTACTCTTGTGC	+	21	179
29594	ATATATAGTCTACTCTTGTGCA	+	22	66
29594	ATATATAGTCTACTCTTGTGCAA	+	23	7
29594	ATATATAGTCTACTCTTGTGCAC	+	23	1
29594	ATATATAGTCTACTCTTGTGCAG	+	23	231
29594	ATATATAGTCTACTCTTGTGCG	+	22	2
29594	ATATATAGTCTACTCTTGTGCTG	+	23	2
29594	ATATATAGTCTACTCTTGTGT	+	21	27
29594	ATATATAGTCTACTCTTGTGTAG	+	23	1
29594	ATATATAGTCTGCTCTTGTGCA	+	22	1
29594	ATATATAGTCTGCTCTTGTGCAG	+	23	1
29594	ATATATAGTCTTCTCTTGTGC	+	21	1
29594	ATATATGGTCTACTCTTGTGCAG	+	23	1
29594	ATATATTGTCTACTCTTGTGCA	+	22	1
29594	ATATGTAGTCTACTCTTGTGC	+	21	1
29594	ATGTATAGTCTACTCTTGTGC	+	21	1
29594	ATGTATAGTCTACTCTTGTGCA	+	22	1
29594	CTATATAGTCTACTCTTGTGCA	+	22	1
29594	CTATATAGTCTACTCTTGTGCAG	+	23	1
29594	GTATATAGTCTACTCTTGTGCAG	+	23	2
29595	AATATAGTCTACTCTTGTGCA	+	21	3
29595	AATATAGTCTACTCTTGTGCAG	+	22	3
29595	AATATAGTCTACTCTTGTGCAGA	+	23	1
29595	GATATAGTCTACTCTTGTGCAG	+	22	1
29595	TAAATAGTCTACTCTTGTGCA	+	21	1
29595	TAAATAGTCTACTCTTGTGCAGA	+	23	1
29595	TATAAAGTCTACTCTTGTGCA	+	21	1
29595	TATATAGACTACTCTTGTGCAG	+	22	1
29595	TATATAGCCTACTCTTGTGCAG	+	22	1
29595	TATATAGCCTACTCTTGTGCAGA	+	23	1
29595	TATATAGTCTACACTTGTGCAGA	+	23	1
29595	TATATAGTCTACCCTTGTGCAGA	+	23	1
29595	TATATAGTCTACTCATGTGCAGA	+	23	1
29595	TATATAGTCTACTCCTGTGCAG	+	22	1
29595	TATATAGTCTACTCTAGTGCA	+	21	1
29595	TATATAGTCTACTCTTGCGCAG	+	22	1
29595	TATATAGTCTACTCTTGTACAGA	+	23	1
29595	TATATAGTCTACTCTTGTGCAG	+	22	53
29595	TATATAGTCTACTCTTGTGCAGA	+	23	83
29595	TATATAGTCTACTCTTGTGCAGG	+	23	1
29595	TATATAGTCTACTCTTGTGCAGT	+	23	4
29595	TATATAGTCTACTCTTGTGCAT	+	22	1
29595	TATATAGTCTACTCTTGTGCG	+	21	1
29595	TATATAGTCTACTCTTGTGCGG	+	22	1
29595	TATATAGTCTACTCTTGTGCGGA	+	23	1
29595	TATATAGTCTACTCTTGTGCTG	+	22	1
29595	TATATAGTCTACTCTTGTGTA	+	21	1
29595	TATATAGTCTACTTTTGTGCAGA	+	23	1
29595	TATATAGTTTACTCTTGTGCAGA	+	23	1
29595	TATGTAGTCTACTCTTGTGCAG	+	22	1
29595	TATGTAGTCTACTCTTGTGCAGA	+	23	1
29595	TTTATAGTCTACTCTTGTGCAG	+	22	2
29596	AAATAGTCTACTCTTGTGCAG	+	21	2
29596	AAATAGTCTACTCTTGTGCAGA	+	22	1
29596	ACATAGTCTACTCTTGTGCAG	+	21	1
29596	AGATAGTCTACTCTTGTGCAG	+	21	1
29596	AGATAGTCTACTCTTGTGCAGA	+	22	1
29596	ATATAGACTACTCTTGTGCAG	+	21	2
29596	ATATAGCCTACTCTTGTGCAG	+	21	2
29596	ATATAGTCAACTCTTGTGCAG	+	21	2
29596	ATATAGTCTAATCTTGTGCAGA	+	22	1
29596	ATATAGTCTACACTTGTGCAG	+	21	1
29596	ATATAGTCTACCCTTGTGCAG	+	21	1
29596	ATATAGTCTACCCTTGTGCAGA	+	22	1
29596	ATATAGTCTACTCATGTGCAG	+	21	2
29596	ATATAGTCTACTCATGTGCAGA	+	22	1
29596	ATATAGTCTACTCCTGTGCAG	+	21	1
29596	ATATAGTCTACTCCTGTGCAGA	+	22	1
29596	ATATAGTCTACTCTAGTGCAG	+	21	3
29596	ATATAGTCTACTCTCGTGCAG	+	21	1
29596	ATATAGTCTACTCTTGAGCAGA	+	22	1
29596	ATATAGTCTACTCTTGCGCAG	+	21	5
29596	ATATAGTCTACTCTTGTGCAC	+	21	9
29596	ATATAGTCTACTCTTGTGCAG	+	21	572
29596	ATATAGTCTACTCTTGTGCAGA	+	22	132
29596	ATATAGTCTACTCTTGTGCAGAA	+	23	18
29596	ATATAGTCTACTCTTGTGCAGC	+	22	13
29596	ATATAGTCTACTCTTGTGCAGG	+	22	3
29596	ATATAGTCTACTCTTGTGCAGT	+	22	188
29596	ATATAGTCTACTCTTGTGCAT	+	21	58
29596	ATATAGTCTACTCTTGTGCGG	+	21	4
29596	ATATAGTCTACTCTTGTGCGGA	+	22	1
29596	ATATAGTCTACTCTTGTGCTG	+	21	1
29596	ATATAGTCTACTCTTGTGTAG	+	21	1
29596	ATATAGTCTACTCTTGTGTAGA	+	22	1
29596	ATATAGTCTACTCTTTTGCAG	+	21	1
29596	ATATAGTCTACTTTTGTGCAG	+	21	1
29596	ATATAGTCTATTCTTGTGCAG	+	21	1
29596	ATATAGTCTTCTCTTGTGCAG	+	21	1
29596	ATATGGTCTACTCTTGTGCAG	+	21	1
29596	ATATTGTCTACTCTTGTGCAG	+	21	1
29596	ATTTAGTCTACTCTTGTGCAG	+	21	2
29596	ATTTAGTCTACTCTTGTGCAGA	+	22	1
29596	GTATAGTCTACTCTTGTGCAG	+	21	6
29596	GTATAGTCTACTCTTGTGCAGA	+	22	1
29596	TTATAGTCTACTCTTGTGCAG	+	21	3
29597	AATAGTCTACTCTTGTGCAGA	+	21	132
29597	AATAGTCTACTCTTGTGCAGAA	+	22	1
29597	AATAGTCTACTCTTGTGCAGAAT	+	23	17
29597	CATAGTCTACTCTTGTGCAGA	+	21	18
29597	CATAGTCTACTCTTGTGCAGAAT	+	23	3
29597	GATAGTCTACTCTTGTGCAGA	+	21	65
29597	GATAGTCTACTCTTGTGCAGAA	+	22	1
29597	GATAGTCTACTCTTGTGCAGAAT	+	23	3
29597	TAAAGTCTACTCTTGTGCAGA	+	21	21
29597	TAAAGTCTACTCTTGTGCAGAAT	+	23	2
29597	TACAGTCTACTCTTGTGCAGA	+	21	24
29597	TACAGTCTACTCTTGTGCAGAAT	+	23	2
29597	TAGAGTCTACTCTTGTGCAGA	+	21	1
29597	TATACTCTACTCTTGTGCAGA	+	21	2
29597	TATAGACTACTCTTGTGCAGA	+	21	35
29597	TATAGACTACTCTTGTGCAGAAT	+	23	8
29597	TATAGCCTACTCTTGTGCAGA	+	21	22
29597	TATAGCCTACTCTTGTGCAGAAT	+	23	2
29597	TATAGTATACTCTTGTGCAGA	+	21	4
29597	TATAGTCAACTCTTGTGCAGA	+	21	24
29597	TATAGTCAACTCTTGTGCAGAA	+	22	1
29597	TATAGTCAACTCTTGTGCAGAAT	+	23	2
29597	TATAGTCCACTCTTGTGCAGA	+	21	20
29597	TATAGTCCACTCTTGTGCAGAA	+	22	1
29597	TATAGTCCACTCTTGTGCAGAAT	+	23	2
29597	TATAGTCGACTCTTGTGCAGA	+	21	1
29597	TATAGTCTAATCTTGTGCAGA	+	21	3
29597	TATAGTCTACACTTGTGCAGA	+	21	21
29597	TATAGTCTACACTTGTGCAGAA	+	22	1
29597	TATAGTCTACCCTTGTGCAGA	+	21	23
29597	TATAGTCTACCCTTGTGCAGAA	+	22	2
29597	TATAGTCTACCCTTGTGCAGAAT	+	23	1
29597	TATAGTCTACGCTTGTGCAGA	+	21	2
29597	TATAGTCTACTCATGTGCAGA	+	21	15
29597	TATAGTCTACTCATGTGCAGAAT	+	23	4
29597	TATAGTCTACTCCTGTGCAGA	+	21	24
29597	TATAGTCTACTCCTGTGCAGAAT	+	23	2
29597	TATAGTCTACTCGTGTGCAGA	+	21	1
29597	TATAGTCTACTCTAGTGCAGA	+	21	27
29597	TATAGTCTACTCTAGTGCAGAAT	+	23	2
29597	TATAGTCTACTCTCGTGCAGA	+	21	17
29597	TATAGTCTACTCTCGTGCAGAAT	+	23	1
29597	TATAGTCTACTCTTATGCAGA	+	21	6
29597	TATAGTCTACTCTTATGCAGAA	+	22	1
29597	TATAGTCTACTCTTCTGCAGA	+	21	2
29597	TATAGTCTACTCTTGAGCAGA	+	21	25
29597	TATAGTCTACTCTTGAGCAGAAT	+	23	3
29597	TATAGTCTACTCTTGCGCAGA	+	21	19
29597	TATAGTCTACTCTTGCGCAGAAT	+	23	2
29597	TATAGTCTACTCTTGGGCAGA	+	21	1
29597	TATAGTCTACTCTTGTACAGA	+	21	10
29597	TATAGTCTACTCTTGTCCAGA	+	21	2
29597	TATAGTCTACTCTTGTGAAGA	+	21	4
29597	TATAGTCTACTCTTGTGAAGAAT	+	23	1
29597	TATAGTCTACTCTTGTGCAAAA	+	22	1
29597	TATAGTCTACTCTTGTGCACA	+	21	4
29597	TATAGTCTACTCTTGTGCACAAT	+	23	1
29597	TATAGTCTACTCTTGTGCAGAA	+	22	224
29597	TATAGTCTACTCTTGTGCAGAAA	+	23	19
29597	TATAGTCTACTCTTGTGCAGAAC	+	23	34
29597	TATAGTCTACTCTTGTGCAGAAG	+	23	8
29597	TATAGTCTACTCTTGTGCAGAAT	+	23	782
29597	TATAGTCTACTCTTGTGCAGAC	+	22	3
29597	TATAGTCTACTCTTGTGCAGAGT	+	23	8
29597	TATAGTCTACTCTTGTGCAGATT	+	23	2
29597	TATAGTCTACTCTTGTGCAGC	+	21	923
29597	TATAGTCTACTCTTGTGCAGCA	+	22	1
29597	TATAGTCTACTCTTGTGCAGG	+	21	200
29597	TATAGTCTACTCTTGTGCAGGA	+	22	1
29597	TATAGTCTACTCTTGTGCAGGAT	+	23	4
29597	TATAGTCTACTCTTGTGCAGT	+	21	13531
29597	TATAGTCTACTCTTGTGCAGTA	+	22	8
29597	TATAGTCTACTCTTGTGCATA	+	21	15
29597	TATAGTCTACTCTTGTGCATAAT	+	23	1
29597	TATAGTCTACTCTTGTGCGGA	+	21	35
29597	TATAGTCTACTCTTGTGGAGA	+	21	3
29597	TATAGTCTACTCTTGTGTAGA	+	21	10
29597	TATAGTCTACTCTTGTGTAGAA	+	22	1
29597	TATAGTCTACTCTTGTTCAGA	+	21	1
29597	TATAGTCTACTCTTGTTCAGAAT	+	23	1
29597	TATAGTCTACTCTTTTGCAGA	+	21	4
29597	TATAGTCTACTCTTTTGCAGAAT	+	23	1
29597	TATAGTCTACTTTTGTGCAGAAT	+	23	3
29597	TATAGTCTATTCTTGTGCAGA	+	21	5
29597	TATAGTCTATTCTTGTGCAGAAT	+	23	1
29597	TATAGTCTCCTCTTGTGCAGA	+	21	2
29597	TATAGTCTGCTCTTGTGCAGA	+	21	13
29597	TATAGTCTGCTCTTGTGCAGAAT	+	23	1
29597	TATAGTCTTCTCTTGTGCAGA	+	21	10
29597	TATAGTGTACTCTTGTGCAGA	+	21	2
29597	TATAGTTTACTCTTGTGCAGA	+	21	3
29597	TATAGTTTACTCTTGTGCAGAAT	+	23	3
29597	TATCGTCTACTCTTGTGCAGA	+	21	2
29597	TATGGTCTACTCTTGTGCAGA	+	21	16
29597	TATGGTCTACTCTTGTGCAGAA	+	22	3
29597	TATGGTCTACTCTTGTGCAGAAT	+	23	1
29597	TATTGTCTACTCTTGTGCAGA	+	21	13
29597	TCTAGTCTACTCTTGTGCAGA	+	21	3
29597	TGTAGTCTACTCTTGTGCAGA	+	21	21
29597	TGTAGTCTACTCTTGTGCAGAA	+	22	1
29597	TGTAGTCTACTCTTGTGCAGAAT	+	23	3
29597	TTTAGTCTACTCTTGTGCAGA	+	21	28
29597	TTTAGTCTACTCTTGTGCAGAA	+	22	2
29597	TTTAGTCTACTCTTGTGCAGAAT	+	23	2
29598	ATAGTCGACTCTTGTGCAGAAT	+	22	1
29598	ATAGTCTACCCTTGTGCAGAAT	+	22	1
29598	ATAGTCTACGCTTGTGCAGAATG	+	23	1
29598	ATAGTCTACTCATGTGCAGAAT	+	22	1
29598	ATAGTCTACTCTTCTGCAGAAT	+	22	1
29598	ATAGTCTACTCTTGAGCAGAAT	+	22	1
29598	ATAGTCTACTCTTGTGCAGAA	+	21	6
29598	ATAGTCTACTCTTGTGCAGAAC	+	22	9
29598	ATAGTCTACTCTTGTGCAGAAT	+	22	121
29598	ATAGTCTACTCTTGTGCAGAATG	+	23	32
29598	ATAGTCTACTCTTGTGCAGAATT	+	23	3
29598	ATAGTCTACTCTTGTGCAGAGT	+	22	1
29598	ATAGTCTACTCTTGTGCGGAAT	+	22	1
29598	ATGGTCTACTCTTGTGCAGAATG	+	23	1
29599	AAGTCTACTCTTGTGCAGAAT	+	21	2
29599	AAGTCTACTCTTGTGCAGAATG	+	22	1
29599	TAGTCTACTCTTGTGCAGAAC	+	21	4
29599	TAGTCTACTCTTGTGCAGAAT	+	21	85
29599	TAGTCTACTCTTGTGCAGAATA	+	22	1
29599	TAGTCTACTCTTGTGCAGAATG	+	22	21
29599	TAGTCTACTCTTGTGCAGAATGA	+	23	6
29599	TAGTCTACTCTTGTGCAGAATGT	+	23	1
29599	TAGTCTACTCTTGTGCAGAATT	+	22	2
29599	TAGTCTACTCTTGTGCAGAGT	+	21	2
29599	TAGTCTACTCTTGTGTAGAAT	+	21	2
29600	AGTCTACTCTTGTGCAGAATG	+	21	4
29600	AGTCTACTCTTGTGCAGAATT	+	21	2
29601	GTCTACTCTTGTGCAGAATGAAA	+	23	1
29601	GTCTACTCTTGTGCAGAATGAAC	+	23	1
29601	GTCTACTCTTGTGCAGAATGAAT	+	23	8
29602	TCTACTCTTGTGCAGAATAAAT	+	22	1
29602	TCTACTCTTGTGCAGAATGAAT	+	22	10
29602	TCTACTCTTGTGCAGAATGAATT	+	23	2
29602	TCTACTCTTGTGCAGAATGTAT	+	22	1
29603	CTACTCTTGTGCAGAATGAAC	+	21	2
29603	CTACTCTTGTGCAGAATGAAGT	+	22	1
29603	CTACTCTTGTGCAGAATGAAT	+	21	2
29603	CTACTCTTGTGCAGAATGAATA	+	22	1
29603	CTACTCTTGTGCAGAATGAATT	+	22	8
29603	CTACTCTTGTGCATAATGAAT	+	21	1
29604	TACTCTTGTGCAGAATGAATT	+	21	4
29604	TACTCTTGTGCAGAATGAATTC	+	22	1
29604	TACTCTTGTGCAGAATGAATTCT	+	23	3
29605	ACTCTTGTGCAGAATGAATTC	+	21	8
29605	ACTCTTGTGCAGAATGAATTCC	+	22	1
29605	ACTCTTGTGCAGAATGAATTCT	+	22	12
29605	ACTCTTGTGCAGAATGAATTCTC	+	23	3
29606	CTCATGTGCAGAATGAATTCTCG	+	23	1
29606	CTCTAGTGCAGAATGAATTCTCG	+	23	1
29606	CTCTTGAGCAGAATGAATTCTCG	+	23	1
29606	CTCTTGTGCAGAACGAATTCTCG	+	23	2
29606	CTCTTGTGCAGAATGAATTCA	+	21	1
29606	CTCTTGTGCAGAATGAATTCC	+	21	4
29606	CTCTTGTGCAGAATGAATTCT	+	21	72
29606	CTCTTGTGCAGAATGAATTCTC	+	22	12
29606	CTCTTGTGCAGAATGAATTCTCA	+	23	2
29606	CTCTTGTGCAGAATGAATTCTCG	+	23	43
29606	CTCTTGTGCAGAATGAATTCTT	+	22	1
29606	CTCTTGTGCAGAGTGAATTCT	+	21	1
29607	TCTTGTGCAGAATGAATTCTCA	+	22	1
29607	TCTTGTGCAGAATGAATTCTCCT	+	23	1
29607	TCTTGTGCAGAATGAATTCTCG	+	22	7
29607	TCTTGTGCAGAATGAATTCTCGC	+	23	1
29607	TCTTGTGCAGAATGAATTCTCGT	+	23	8
29608	CTTGAGCAGAATGAATTCTCGTA	+	23	1
29608	CTTGTGCAGAACGAATTCTCGTA	+	23	3
29608	CTTGTGCAGAATCAATTCTCGTA	+	23	2
29608	CTTGTGCAGAATGAAATCTCGTA	+	23	2
29608	CTTGTGCAGAATGAATACTCG	+	21	1
29608	CTTGTGCAGAATGAATTATCGTA	+	23	1
29608	CTTGTGCAGAATGAATTCTCG	+	21	6
29608	CTTGTGCAGAATGAATTCTCGC	+	22	1
29608	CTTGTGCAGAATGAATTCTCGT	+	22	14
29608	CTTGTGCAGAATGAATTCTCGTA	+	23	104
29608	CTTGTGCAGAATGCATTCTCGTA	+	23	1
29608	CTTGTGCAGAATGGATTCTCGTA	+	23	1
29608	CTTGTGCAGAGTGAATTCTCGTA	+	23	1
29609	TTGTGCAGAATGAATTCTCGC	+	21	2
29609	TTGTGCAGAATGAATTCTCGTAA	+	23	1
29609	TTGTGCAGAATGAGTTCTCGTA	+	22	1
29609	TTGTGCAGAATGGATTCTCGTA	+	22	1
29609	TTGTGCAGATTGAATTCTCGTA	+	22	1
29610	TGTGCAGAATGAATTCTCGTAAA	+	23	1
29610	TGTGCAGAATGAATTCTCGTAAC	+	23	2
29610	TGTGCAGGATGAATTCTCGTAAC	+	23	2
29610	TGTGCGGAATGAATTCTCGTAAC	+	23	1
29611	GTGCAGAATGAATTCTCGTAA	+	21	1
29611	GTGCAGAATGAATTCTCGTAAA	+	22	1
29611	GTGCAGAATGAATTCTCGTAAC	+	22	4
29611	GTGCAGAATGAATTCTCGTAACA	+	23	1
29611	GTGCAGAATGAATTCTCGTAACC	+	23	3
29611	GTGCAGAATGAATTCTCGTAACG	+	23	2
29611	GTGCAGAATGAATTCTCGTAACT	+	23	29
29612	AGCAGAATGAATTCTCGTAACTA	+	23	1
29612	TGCAGAATAAATTCTCGTAACTA	+	23	1
29612	TGCAGAATGAACTCTCGTAACT	+	22	1
29612	TGCAGAATGAATTCTCGTAAC	+	21	12
29612	TGCAGAATGAATTCTCGTAACA	+	22	2
29612	TGCAGAATGAATTCTCGTAACAA	+	23	1
29612	TGCAGAATGAATTCTCGTAACT	+	22	34
29612	TGCAGAATGAATTCTCGTAACTA	+	23	36
29612	TGCAGAATGAATTCTCGTAACTT	+	23	1
29612	TGCAGAATGAATTCTCGTAAT	+	21	1
29612	TGCAGAATGAATTCTCGTAGCTA	+	23	2
29612	TGCAGAATGAGTTCTCGTAACT	+	22	1
29612	TGCGGAATGAATTCTCGTAACTA	+	23	1
29613	GCAGAATGAATTCTCGCAACT	+	21	1
29613	GCAGAATGAATTCTCGTAACA	+	21	1
29613	GCAGAATGAATTCTCGTAACC	+	21	1
29613	GCAGAATGAATTCTCGTAACT	+	21	7
29613	GCAGAATGAATTCTCGTAACTA	+	22	6
29613	GCAGAATGAATTCTCGTAACTAC	+	23	7
29613	GCAGAATGAATTCTCGTATCT	+	21	1
29614	CAAAATGAATTCTCGTAACTA	+	21	1
29614	CAAAATGAATTCTCGTAACTAC	+	22	1
29614	CAAAATGAATTCTCGTAACTACA	+	23	1
29614	CACAATGAATTCTCGTAACTA	+	21	1
29614	CAGAAAGAATTCTCGTAACTA	+	21	4
29614	CAGAAAGAATTCTCGTAACTAC	+	22	2
29614	CAGAAAGAATTCTCGTAACTACA	+	23	6
29614	CAGAACGAATTCTCGTAACTAC	+	22	3
29614	CAGAACGAATTCTCGTAACTACA	+	23	2
29614	CAGAAGGAATTCTCGTAACTA	+	21	1
29614	CAGAATAAATTCTCGTAACTA	+	21	2
29614	CAGAATAAATTCTCGTAACTACA	+	23	1
29614	CAGAATGAAATCTCGTAACTA	+	21	2
29614	CAGAATGAAATCTCGTAACTAC	+	22	4
29614	CAGAATGAACTCTCGTAACTA	+	21	3
29614	CAGAATGAACTCTCGTAACTAC	+	22	1
29614	CAGAATGAACTCTCGTAACTACA	+	23	2
29614	CAGAATGAAGTCTCGTAACTAC	+	22	1
29614	CAGAATGAAGTCTCGTAACTACA	+	23	3
29614	CAGAATGAATACTCGTAACTA	+	21	2
29614	CAGAATGAATACTCGTAACTAC	+	22	3
29614	CAGAATGAATACTCGTAACTACA	+	23	3
29614	CAGAATGAATCCTCGTAACTA	+	21	2
29614	CAGAATGAATCCTCGTAACTAC	+	22	1
29614	CAGAATGAATCCTCGTAACTACA	+	23	2
29614	CAGAATGAATTATCGTAACTAC	+	22	1
29614	CAGAATGAATTCACGTAACTA	+	21	2
29614	CAGAATGAATTCACGTAACTAC	+	22	1
29614	CAGAATGAATTCCCGTAACTA	+	21	6
29614	CAGAATGAATTCCCGTAACTAC	+	22	2
29614	CAGAATGAATTCCCGTAACTACA	+	23	4
29614	CAGAATGAATTCTAGTAACTA	+	21	1
29614	CAGAATGAATTCTAGTAACTAC	+	22	1
29614	CAGAATGAATTCTCATAACTA	+	21	1
29614	CAGAATGAATTCTCATAACTAC	+	22	1
29614	CAGAATGAATTCTCGAAACTAC	+	22	3
29614	CAGAATGAATTCTCGCAACTA	+	21	2
29614	CAGAATGAATTCTCGTAACAACA	+	23	2
29614	CAGAATGAATTCTCGTAACCA	+	21	2
29614	CAGAATGAATTCTCGTAACCACA	+	23	1
29614	CAGAATGAATTCTCGTAACGA	+	21	1
29614	CAGAATGAATTCTCGTAACTA	+	21	617
29614	CAGAATGAATTCTCGTAACTAA	+	22	4
29614	CAGAATGAATTCTCGTAACTAC	+	22	510
29614	CAGAATGAATTCTCGTAACTACA	+	23	913
29614	CAGAATGAATTCTCGTAACTACG	+	23	10
29614	CAGAATGAATTCTCGTAACTACT	+	23	9
29614	CAGAATGAATTCTCGTAACTAT	+	22	30
29614	CAGAATGAATTCTCGTAACTATA	+	23	1
29614	CAGAATGAATTCTCGTAACTG	+	21	4
29614	CAGAATGAATTCTCGTAACTT	+	21	7
29614	CAGAATGAATTCTCGTAAGTA	+	21	1
29614	CAGAATGAATTCTCGTAATTAC	+	22	1
29614	CAGAATGAATTCTCGTAATTACA	+	23	1
29614	CAGAATGAATTCTCGTAGCTAC	+	22	2
29614	CAGAATGAATTCTCGTAGCTACA	+	23	1
29614	CAGAATGAATTCTCGTATCTACA	+	23	1
29614	CAGAATGAATTCTCGTGACTAC	+	22	2
29614	CAGAATGAATTCTCGTGACTACA	+	23	2
29614	CAGAATGAATTCTTGTAACTACA	+	23	2
29614	CAGAATGAATTGTCGTAACTAC	+	22	2
29614	CAGAATGAATTGTCGTAACTACA	+	23	1
29614	CAGAATGAATTTTCGTAACTA	+	21	1
29614	CAGAATGAGTTCTCGTAACTA	+	21	3
29614	CAGAATGAGTTCTCGTAACTAC	+	22	3
29614	CAGAATGAGTTCTCGTAACTACA	+	23	3
29614	CAGAATGATTTCTCGTAACTA	+	21	2
29614	CAGAATGATTTCTCGTAACTAC	+	22	4
29614	CAGAATGATTTCTCGTAACTACA	+	23	3
29614	CAGAATGCATTCTCGTAACTACA	+	23	1
29614	CAGAATGGATTCTCGTAACTA	+	21	5
29614	CAGAATGGATTCTCGTAACTAC	+	22	2
29614	CAGAATGGATTCTCGTAACTACA	+	23	2
29614	CAGAATGTATTCTCGTAACTAC	+	22	1
29614	CAGAGTGAATTCTCGTAACTA	+	21	3
29614	CAGAGTGAATTCTCGTAACTACA	+	23	1
29614	CAGGATGAATTCTCGTAACTA	+	21	1
29614	CAGGATGAATTCTCGTAACTAC	+	22	1
29614	CAGTATGAATTCTCGTAACTACA	+	23	2
29614	CATAATGAATTCTCGTAACTA	+	21	1
29614	CGGAATGAATTCTCGTAACTA	+	21	1
29614	CGGAATGAATTCTCGTAACTAC	+	22	1
29614	CGGAATGAATTCTCGTAACTACA	+	23	4
29614	CTGAATGAATTCTCGTAACTAC	+	22	8
29614	CTGAATGAATTCTCGTAACTACA	+	23	7
29614	TAGAATGAATTCTCGTAACTAC	+	22	2
29614	TAGAATGAATTCTCGTAACTACA	+	23	2
29615	AGAAAGAATTCTCGTAACTAC	+	21	2
29615	AGAAAGAATTCTCGTAACTACA	+	22	1
29615	AGAAAGAATTCTCGTAACTACAT	+	23	2
29615	AGAACGAATTCTCGTAACTACA	+	22	1
29615	AGAACGAATTCTCGTAACTACAT	+	23	1
29615	AGAATAAATTCTCGTAACTAC	+	21	1
29615	AGAATGAAATCTCGTAACTACA	+	22	1
29615	AGAATGAATACTCGTAACTAC	+	21	1
29615	AGAATGAATCCTCGTAACTAC	+	21	1
29615	AGAATGAATTCACGTAACTACA	+	22	1
29615	AGAATGAATTCCCGTAACTACAT	+	23	1
29615	AGAATGAATTCTCGAAACTACA	+	22	1
29615	AGAATGAATTCTCGCAACTAC	+	21	1
29615	AGAATGAATTCTCGTAACAACA	+	22	1
29615	AGAATGAATTCTCGTAACTAC	+	21	109
29615	AGAATGAATTCTCGTAACTACA	+	22	141
29615	AGAATGAATTCTCGTAACTACAC	+	23	4
29615	AGAATGAATTCTCGTAACTACAG	+	23	2
29615	AGAATGAATTCTCGTAACTACAT	+	23	100
29615	AGAATGAATTCTCGTAACTACG	+	22	3
29615	AGAATGAATTCTCGTAACTACGT	+	23	2
29615	AGAATGAATTCTCGTAACTACT	+	22	2
29615	AGAATGAATTCTCGTAACTAT	+	21	6
29615	AGAATGAATTCTCGTAGCTAC	+	21	1
29615	AGAATGAATTCTCGTATCTAC	+	21	1
29615	AGAATGAATTCTCGTGACTACAT	+	23	1
29615	AGAATGAATTCTTGTAACTAC	+	21	1
29615	AGAATGGATTCTCGTAACTAC	+	21	1
29615	AGAATGGATTCTCGTAACTACA	+	22	2
29615	AGAATGGATTCTCGTAACTACAT	+	23	1
29615	AGAATGTATTCTCGTAACTAC	+	21	2
29615	AGATTGAATTCTCGTAACTACA	+	22	1
29615	CGAATGAATTCTCGTAACTACAT	+	23	1
29615	GGAATGAATTCTCGTAACTAC	+	21	1
29615	GGAATGAATTCTCGTAACTACA	+	22	1
29616	AAATGAATTCTCGTAACTACAT	+	22	1
29616	AAATGAATTCTCGTAACTACATA	+	23	2
29616	GAATGAAATCTCGTAACTACATA	+	23	2
29616	GAATGAAGTCTCGTAACTACA	+	21	1
29616	GAATGAAGTCTCGTAACTACATA	+	23	1
29616	GAATGAATTCCCGTAACTACA	+	21	1
29616	GAATGAATTCCCGTAACTACAT	+	22	1
29616	GAATGAATTCCCGTAACTACATA	+	23	1
29616	GAATGAATTCTCGCAACTACATA	+	23	1
29616	GAATGAATTCTCGTAACAACA	+	21	1
29616	GAATGAATTCTCGTAACTACA	+	21	105
29616	GAATGAATTCTCGTAACTACAA	+	22	2
29616	GAATGAATTCTCGTAACTACAAA	+	23	1
29616	GAATGAATTCTCGTAACTACAC	+	22	2
29616	GAATGAATTCTCGTAACTACACA	+	23	1
29616	GAATGAATTCTCGTAACTACAG	+	22	1
29616	GAATGAATTCTCGTAACTACAT	+	22	41
29616	GAATGAATTCTCGTAACTACATA	+	23	76
29616	GAATGAATTCTCGTAACTACGT	+	22	2
29616	GAATGAATTCTCGTAACTACGTA	+	23	2
29616	GAATGAATTCTCGTAACTACT	+	21	2
29616	GAATGAATTCTCGTAACTATATA	+	23	1
29616	GAATGAATTCTCGTAACTGCATA	+	23	1
29616	GAATGAATTCTCGTAGCTACATA	+	23	1
29616	GAATGAATTCTCGTATCTACATA	+	23	1
29616	GAATGAGTTCTCGTAACTACA	+	21	1
29616	GTATGAATTCTCGTAACTACATA	+	23	1
29617	AAAGAATTCTCGTAACTACAT	+	21	2
29617	AAAGAATTCTCGTAACTACATA	+	22	3
29617	AACGAATTCTCGTAACTACATA	+	22	2
29617	AACGAATTCTCGTAACTACATAG	+	23	1
29617	AATAAATTCTCGTAACTACATA	+	22	5
29617	AATAAATTCTCGTAACTACATAG	+	23	1
29617	AATCAATTCTCGTAACTACATAG	+	23	1
29617	AATGAAATCTCGTAACTACATA	+	22	2
29617	AATGAAATCTCGTAACTACATAG	+	23	1
29617	AATGAAGTCTCGTAACTACAT	+	21	1
29617	AATGAAGTCTCGTAACTACATA	+	22	1
29617	AATGAAGTCTCGTAACTACATAG	+	23	1
29617	AATGAATACTCGTAACTACATA	+	22	1
29617	AATGAATCCTCGTAACTACAT	+	21	1
29617	AATGAATTATCGTAACTACAT	+	21	1
29617	AATGAATTATCGTAACTACATA	+	22	1
29617	AATGAATTCACGTAACTACATA	+	22	1
29617	AATGAATTCCCGTAACTACAT	+	21	1
29617	AATGAATTCCCGTAACTACATA	+	22	4
29617	AATGAATTCGCGTAACTACATAG	+	23	1
29617	AATGAATTCTAGTAACTACATAG	+	23	1
29617	AATGAATTCTCGTAACAACATA	+	22	3
29617	AATGAATTCTCGTAACAACATAG	+	23	2
29617	AATGAATTCTCGTAACCACATA	+	22	1
29617	AATGAATTCTCGTAACGACATAG	+	23	1
29617	AATGAATTCTCGTAACTAAATA	+	22	1
29617	AATGAATTCTCGTAACTACAA	+	21	4
29617	AATGAATTCTCGTAACTACAAA	+	22	1
29617	AATGAATTCTCGTAACTACAAAG	+	23	1
29617	AATGAATTCTCGTAACTACAC	+	21	12
29617	AATGAATTCTCGTAACTACACA	+	22	1
29617	AATGAATTCTCGTAACTACAG	+	21	4
29617	AATGAATTCTCGTAACTACAT	+	21	286
29617	AATGAATTCTCGTAACTACATA	+	22	518
29617	AATGAATTCTCGTAACTACATAA	+	23	5
29617	AATGAATTCTCGTAACTACATAG	+	23	152
29617	AATGAATTCTCGTAACTACATG	+	22	5
29617	AATGAATTCTCGTAACTACATGG	+	23	1
29617	AATGAATTCTCGTAACTACATT	+	22	4
29617	AATGAATTCTCGTAACTACGTA	+	22	1
29617	AATGAATTCTCGTAACTACTTA	+	22	1
29617	AATGAATTCTCGTAACTGCAT	+	21	2
29617	AATGAATTCTCGTAACTGCATA	+	22	2
29617	AATGAATTCTCGTAAGTACAT	+	21	1
29617	AATGAATTCTCGTAATTACAT	+	21	1
29617	AATGAATTCTCGTAATTACATA	+	22	1
29617	AATGAATTCTCGTAGCTACAT	+	21	1
29617	AATGAATTCTCGTAGCTACATA	+	22	1
29617	AATGAATTCTCGTGACTACAT	+	21	2
29617	AATGAATTCTCGTGACTACATA	+	22	1
29617	AATGAATTCTCTTAACTACAT	+	21	1
29617	AATGAATTCTTGTAACTACATA	+	22	3
29617	AATGAGTTCTCGTAACTACATA	+	22	5
29617	AATGGATTCTCGTAACTACATA	+	22	1
29617	ACTGAATTCTCGTAACTACATAG	+	23	1
29617	AGTGAATTCTCGTAACTACATA	+	22	3
29617	ATTGAATTCTCGTAACTACATA	+	22	1
29617	ATTGAATTCTCGTAACTACATAG	+	23	1
29617	GATGAATTCTCGTAACTACAT	+	21	1
29617	GATGAATTCTCGTAACTACATA	+	22	3
29617	GATGAATTCTCGTAACTACATAG	+	23	1
29618	ATAAATTCTCGTAACTACATAG	+	22	1
29618	ATGAAATCTCGTAACTACATA	+	21	2
29618	ATGAAATCTCGTAACTACATAGC	+	23	1
29618	ATGAATCCTCGTAACTACATA	+	21	1
29618	ATGAATTCTCGTAACTACATA	+	21	162
29618	ATGAATTCTCGTAACTACATAA	+	22	3
29618	ATGAATTCTCGTAACTACATAG	+	22	29
29618	ATGAATTCTCGTAACTACATAGA	+	23	1
29618	ATGAATTCTCGTAACTACATAGC	+	23	21
29618	ATGAATTCTCGTAACTACATAGT	+	23	3
29618	ATGAATTCTCGTAACTGCATAG	+	22	1
29618	ATGAATTCTCGTTACTACATAG	+	22	1
29618	ATGAATTCTTGTAACTACATA	+	21	2
29618	ATGGATTCTCGTAACTACATA	+	21	1
29618	ATGTATTCTCGTAACTACATA	+	21	1
29619	TAAATTCTCGTAACTACATAGCA	+	23	1
29619	TGAAATCTCGTAACTACATAG	+	21	1
29619	TGAATTCCCGTAACTACATAGC	+	22	1
29619	TGAATTCTCGTAACTACATAG	+	21	34
29619	TGAATTCTCGTAACTACATAGA	+	22	1
29619	TGAATTCTCGTAACTACATAGC	+	22	37
29619	TGAATTCTCGTAACTACATAGCA	+	23	43
29619	TGAATTCTCGTAACTACATAGT	+	22	1
29619	TGAATTCTCGTAACTACATGGC	+	22	1
29619	TGAATTCTCGTATCTACATAG	+	21	1
29619	TTAATTCTCGTAACTACATAGCA	+	23	1
29620	GAATCCTCGTAACTACATAGCAC	+	23	2
29620	GAATTCTCGTAACTACATAGC	+	21	6
29620	GAATTCTCGTAACTACATAGCA	+	22	3
29620	GAATTCTCGTAACTACATAGCAC	+	23	6
29620	GAATTCTCGTAACTACATAGCAT	+	23	1
29621	AAATCTCGTAACTACATAGCACA	+	23	2
29621	AATCCTCGTAACTACATAGCA	+	21	2
29621	AATTCACGTAACTACATAGCACA	+	23	1
29621	AATTCCCGTAACTACATAGCACA	+	23	1
29621	AATTCTCGAAACTACATAGCACA	+	23	2
29621	AATTCTCGCAACTACATAGCACA	+	23	1
29621	AATTCTCGTAACCACATAGCACA	+	23	1
29621	AATTCTCGTAACTACATAACACA	+	23	1
29621	AATTCTCGTAACTACATAGCA	+	21	37
29621	AATTCTCGTAACTACATAGCAA	+	22	2
29621	AATTCTCGTAACTACATAGCAC	+	22	42
29621	AATTCTCGTAACTACATAGCACA	+	23	217
29621	AATTCTCGTAACTACATAGCACC	+	23	1
29621	AATTCTCGTAACTACATAGCACG	+	23	4
29621	AATTCTCGTAACTACATAGCACT	+	23	5
29621	AATTCTCGTAACTACATAGCAT	+	22	1
29621	AATTCTCGTAACTACATAGCGCA	+	23	1
29621	AATTCTCGTAACTACATAGTACA	+	23	1
29621	AATTCTCGTAACTACATATCACA	+	23	1
29621	AATTCTCGTAACTACGTAGCAC	+	22	1
29621	AATTCTCGTAGCTACATAGCA	+	21	1
29621	AATTCTCGTAGCTACATAGCACA	+	23	1
29621	AATTCTCGTGACTACATAGCACA	+	23	2
29621	AATTCTCTTAACTACATAGCACA	+	23	1
29621	AATTCTTGTAACTACATAGCAC	+	22	1
29621	AATTCTTGTAACTACATAGCACA	+	23	1
29621	ATTTCTCGTAACTACATAGCACA	+	23	1
29622	AATCTCGTAACTACATAGCACA	+	22	1
29622	ATTCACGTAACTACATAGCACA	+	22	1
29622	ATTCTCGTAACTACATAGCAC	+	21	9
29622	ATTCTCGTAACTACATAGCACA	+	22	35
29622	ATTCTCGTAACTACATAGCACAA	+	23	7
29622	ATTCTCGTAACTACATAGCACG	+	22	1
29622	ATTCTCGTAACTACATAGCACT	+	22	1
29622	ATTCTCGTAACTACATAGCAT	+	21	1
29622	ATTCTCGTAACTACATAGTACAA	+	23	1
29622	CTTCTCGTAACTACATAGCACA	+	22	1
29623	TTCTCGTAACTACATAGCACA	+	21	32
29623	TTCTCGTAACTACATAGCACAA	+	22	6
29623	TTCTCGTAACTACATAGCACAAG	+	23	6
29623	TTCTCGTAACTACATAGCACGAG	+	23	1
29623	TTCTCGTAACTGCATAGCACAA	+	22	1
29624	TCCCGTAACTACATAGCACAAGT	+	23	1
29624	TCTCGTAACTACATAGCACAAG	+	22	1
29624	TCTCGTAACTACATAGCACAAGC	+	23	2
29624	TCTCGTAACTACATAGCACAAGT	+	23	11
29625	CTCGTAACTACATAGCACAAGC	+	22	3
29625	CTCGTAACTACATAGCACAAGG	+	22	1
29625	CTCGTAACTACATAGCACAAGT	+	22	20
29625	CTCGTAACTACATAGCACAAGTA	+	23	15
29625	CTCGTAACTACATAGCACGAGT	+	22	1
29626	GCGTAACTACATAGCACAAGTA	+	22	1
29626	TCGTAACTACATAGCACAAGTA	+	22	7
29627	CGTAACTACATAGCACAAGTA	+	21	7
29627	CGTAACTACATAGCACAAGTAG	+	22	1
29627	CGTAACTACATAGCACAAGTAGA	+	23	5
29630	AACTACATAGCACAAGTAGATG	+	22	1
29631	ACTACATAGCACAAGTAGATGT	+	22	3
29632	CTACATAGCACAAGTAGATGA	+	21	1
29632	CTACATAGCACAAGTAGATGT	+	21	1
29633	TACATAGCACAAGTAGATGTAGA	+	23	1
29633	TACATAGCACAAGTAGATGTAGT	+	23	2
29634	ACATAGCAAAAGTAGATGTAGTT	+	23	1
29634	ACATAGCACAAGTAGAAGTAG	+	21	1
29634	ACATAGCACAAGTAGACGTAGTT	+	23	1
29634	ACATAGCACAAGTAGATGTAG	+	21	22
29634	ACATAGCACAAGTAGATGTAGC	+	22	1
29634	ACATAGCACAAGTAGATGTAGT	+	22	11
29634	ACATAGCACAAGTAGATGTAGTC	+	23	6
29634	ACATAGCACAAGTAGATGTAGTT	+	23	49
29634	ACATAGCACAAGTGGATGTAG	+	21	1
29634	ACATAGCACGAGTAGATGTAG	+	21	2
29634	ACATGGCACAAGTAGATGTAGTT	+	23	1
29634	CCATAGCACAAGTAGATGTAGTT	+	23	2
29634	TCATAGCACAAGTAGATGTAGTT	+	23	1
29635	AATAGCACAAGTAGATGTAGTT	+	22	1
29635	CAAAGCACAAGTAGATGTAGTT	+	22	10
29635	CAAAGCACAAGTAGATGTAGTTA	+	23	1
29635	CACAGCACAAGTAGATGTAGTT	+	22	4
29635	CATAACACAAGTAGATGTAGT	+	21	2
29635	CATAACACAAGTAGATGTAGTT	+	22	2
29635	CATAACACAAGTAGATGTAGTTA	+	23	1
29635	CATACCACAAGTAGATGTAGTT	+	22	3
29635	CATAGAACAAGTAGATGTAGTT	+	22	2
29635	CATAGAACAAGTAGATGTAGTTA	+	23	1
29635	CATAGCAAAAGTAGATGTAGTTA	+	23	1
29635	CATAGCACAACTAGATGTAGTT	+	22	3
29635	CATAGCACAAGAAGATGTAGTT	+	22	10
29635	CATAGCACAAGCAGATGTAGTT	+	22	1
29635	CATAGCACAAGTAGAAGTAGT	+	21	1
29635	CATAGCACAAGTAGAAGTAGTT	+	22	1
29635	CATAGCACAAGTAGAAGTAGTTA	+	23	2
29635	CATAGCACAAGTAGACGTAGTT	+	22	3
29635	CATAGCACAAGTAGAGGTAGTT	+	22	2
29635	CATAGCACAAGTAGATCTAGTT	+	22	2
29635	CATAGCACAAGTAGATGAAGTT	+	22	4
29635	CATAGCACAAGTAGATGCAGTT	+	22	3
29635	CATAGCACAAGTAGATGTAATT	+	22	1
29635	CATAGCACAAGTAGATGTAGAT	+	22	2
29635	CATAGCACAAGTAGATGTAGC	+	21	1
29635	CATAGCACAAGTAGATGTAGCT	+	22	17
29635	CATAGCACAAGTAGATGTAGCTA	+	23	1
29635	CATAGCACAAGTAGATGTAGGT	+	22	7
29635	CATAGCACAAGTAGATGTAGT	+	21	55
29635	CATAGCACAAGTAGATGTAGTA	+	22	15
29635	CATAGCACAAGTAGATGTAGTC	+	22	93
29635	CATAGCACAAGTAGATGTAGTG	+	22	11
29635	CATAGCACAAGTAGATGTAGTT	+	22	1463
29635	CATAGCACAAGTAGATGTAGTTA	+	23	212
29635	CATAGCACAAGTAGATGTAGTTG	+	23	2
29635	CATAGCACAAGTAGATGTAGTTT	+	23	1
29635	CATAGCACAAGTAGATGTATTT	+	22	1
29635	CATAGCACAAGTAGATGTGGTT	+	22	5
29635	CATAGCACAAGTAGATGTGGTTA	+	23	1
29635	CATAGCACAAGTAGATGTTGTT	+	22	2
29635	CATAGCACAAGTAGATTTAGTT	+	22	1
29635	CATAGCACAAGTAGGTGTAGTT	+	22	4
29635	CATAGCACAAGTCGATGTAGTT	+	22	1
29635	CATAGCACAAGTGGATGTAGTT	+	22	5
29635	CATAGCACAAGTTGATGTAGTT	+	22	2
29635	CATAGCACAGGTAGATGTAGTT	+	22	7
29635	CATAGCACATGTAGATGTAGTT	+	22	1
29635	CATAGCACGAGTAGATGTAGTT	+	22	1
29635	CATAGCCCAAGTAGATGTAGTT	+	22	1
29635	CATAGCGCAAGTAGATGTAGTT	+	22	9
29635	CATAGCTCAAGTAGATGTAGTT	+	22	2
29635	CATATCACAAGTAGATGTAGTT	+	22	1
29635	CATATCACAAGTAGATGTAGTTA	+	23	2
29635	CATGGCACAAGTAGATGTAGTT	+	22	2
29635	CATTGCACAAGTAGATGTAGTT	+	22	5
29635	CGTAGCACAAGTAGATGTAGT	+	21	1
29635	CGTAGCACAAGTAGATGTAGTT	+	22	3
29635	CGTAGCACAAGTAGATGTAGTTA	+	23	1
29635	CTTAGCACAAGTAGATGTAGTT	+	22	6
29635	CTTAGCACAAGTAGATGTAGTTA	+	23	1
29635	TATAGCACAAGTAGATGTAGTT	+	22	2
29636	AAAGCACAAGTAGATGTAGTT	+	21	7
29636	ACAGCACAAGTAGATGTAGTT	+	21	2
29636	AGAGCACAAGTAGATGTAGTT	+	21	1
29636	ATAACACAAGTAGATGTAGTT	+	21	1
29636	ATACCACAAGTAGATGTAGTT	+	21	2
29636	ATAGAACAAGTAGATGTAGTT	+	21	3
29636	ATAGCAAAAGTAGATGTAGTT	+	21	2
29636	ATAGCACAAATAGATGTAGTT	+	21	1
29636	ATAGCACAACTAGATGTAGTT	+	21	2
29636	ATAGCACAAGAAGATGTAGTT	+	21	5
29636	ATAGCACAAGAAGATGTAGTTA	+	22	1
29636	ATAGCACAAGAAGATGTAGTTAA	+	23	1
29636	ATAGCACAAGCAGATGTAGTT	+	21	3
29636	ATAGCACAAGTACATGTAGTT	+	21	2
29636	ATAGCACAAGTAGAAGTAGTT	+	21	5
29636	ATAGCACAAGTAGACGTAGTT	+	21	3
29636	ATAGCACAAGTAGATGAAGTT	+	21	5
29636	ATAGCACAAGTAGATGGAGTT	+	21	2
29636	ATAGCACAAGTAGATGTACTT	+	21	2
29636	ATAGCACAAGTAGATGTAGAT	+	21	5
29636	ATAGCACAAGTAGATGTAGATA	+	22	1
29636	ATAGCACAAGTAGATGTAGCT	+	21	4
29636	ATAGCACAAGTAGATGTAGGT	+	21	9
29636	ATAGCACAAGTAGATGTAGTA	+	21	17
29636	ATAGCACAAGTAGATGTAGTC	+	21	115
29636	ATAGCACAAGTAGATGTAGTG	+	21	14
29636	ATAGCACAAGTAGATGTAGTT	+	21	2153
29636	ATAGCACAAGTAGATGTAGTTA	+	22	254
29636	ATAGCACAAGTAGATGTAGTTAA	+	23	23
29636	ATAGCACAAGTAGATGTAGTTT	+	22	7
29636	ATAGCACAAGTAGATGTATTT	+	21	1
29636	ATAGCACAAGTAGATGTCGTT	+	21	1
29636	ATAGCACAAGTAGATGTGGTT	+	21	5
29636	ATAGCACAAGTAGATGTGGTTA	+	22	1
29636	ATAGCACAAGTAGCTGTAGTT	+	21	3
29636	ATAGCACAAGTAGGTGTAGTT	+	21	6
29636	ATAGCACAAGTATATGTAGTT	+	21	1
29636	ATAGCACAAGTCGATGTAGTT	+	21	2
29636	ATAGCACAAGTGGATGTAGTT	+	21	3
29636	ATAGCACAAGTGGATGTAGTTA	+	22	2
29636	ATAGCACAAGTTGATGTAGTT	+	21	2
29636	ATAGCACAATTAGATGTAGTT	+	21	1
29636	ATAGCACAGGTAGATGTAGTT	+	21	9
29636	ATAGCACATGTAGATGTAGTT	+	21	1
29636	ATAGCACGAGTAGATGTAGTT	+	21	5
29636	ATAGCAGAAGTAGATGTAGTT	+	21	1
29636	ATAGCCCAAGTAGATGTAGTT	+	21	1
29636	ATAGCGCAAGTAGATGTAGTT	+	21	12
29636	ATAGCTCAAGTAGATGTAGTT	+	21	2
29636	ATAGGACAAGTAGATGTAGTTA	+	22	1
29636	ATAGTACAAGTAGATGTAGTT	+	21	2
29636	ATATCACAAGTAGATGTAGTTA	+	22	1
29636	ATCGCACAAGTAGATGTAGTT	+	21	1
29636	ATGGCACAAGTAGATGTAGTT	+	21	7
29636	ATGGCACAAGTAGATGTAGTTA	+	22	1
29636	CTAGCACAAGTAGATGTAGTT	+	21	2
29636	GTAGCACAAGTAGATGTAGTT	+	21	9
29636	GTAGCACAAGTAGATGTAGTTA	+	22	1
29636	TTAGCACAAGTAGATGTAGTT	+	21	3
29637	TAGCACAAGTAGATGTAGTTA	+	21	22
29637	TAGCACAAGTAGATGTAGTTAA	+	22	5
29637	TAGCACAAGTAGATGTAGTTAAA	+	23	1
29637	TAGCACAAGTAGATGTAGTTAAC	+	23	18
29637	TAGCACAAGTAGATGTAGTTAAT	+	23	1
29637	TAGCACAAGTAGATGTAGTTGAC	+	23	1
29638	AGCACAAGTAGATGTAGTTAA	+	21	10
29638	AGCACAAGTAGATGTAGTTAAC	+	22	19
29638	AGCACAAGTAGATGTAGTTAACC	+	23	1
29638	AGCACAAGTAGATGTAGTTAACT	+	23	40
29638	AGCACAAGTAGATGTAGTTAATT	+	23	1
29638	AGCACAAGTTGATGTAGTTAAC	+	22	1
29638	AGCACATGTAGATGTAGTTAACT	+	23	1
29638	AGCACGAGTAGATGTAGTTAAC	+	22	1
29638	CGCACAAGTAGATGTAGTTAACT	+	23	1
29639	GCACAAGTAGATGTAGTAAACT	+	22	1
29639	GCACAAGTAGATGTAGTTAAC	+	21	11
29639	GCACAAGTAGATGTAGTTAACCT	+	23	1
29639	GCACAAGTAGATGTAGTTAACT	+	22	23
29639	GCACAAGTAGATGTAGTTAACTC	+	23	1
29639	GCACAAGTAGATGTAGTTAACTT	+	23	34
29639	GCACAAGTAGATGTAGTTGACT	+	22	1
29639	GCACGAGTAGATGTAGTTAACTT	+	23	1
29639	GCGCAAGTAGATGTAGTTAACT	+	22	1
29639	TCACAAGTAGATGTAGTTAAC	+	21	1
29639	TCACAAGTAGATGTAGTTAACTT	+	23	1
29640	CACAAGTAGAAGTAGTTAACTTT	+	23	1
29640	CACAAGTAGATATAGTTAACTT	+	22	1
29640	CACAAGTAGATCTAGTTAACTT	+	22	1
29640	CACAAGTAGATGTAGTTAACA	+	21	1
29640	CACAAGTAGATGTAGTTAACC	+	21	3
29640	CACAAGTAGATGTAGTTAACCTT	+	23	1
29640	CACAAGTAGATGTAGTTAACT	+	21	47
29640	CACAAGTAGATGTAGTTAACTC	+	22	3
29640	CACAAGTAGATGTAGTTAACTGT	+	23	1
29640	CACAAGTAGATGTAGTTAACTT	+	22	41
29640	CACAAGTAGATGTAGTTAACTTC	+	23	1
29640	CACAAGTAGATGTAGTTAACTTG	+	23	1
29640	CACAAGTAGATGTAGTTAACTTT	+	23	58
29640	CACAAGTAGATGTAGTTACCT	+	21	1
29640	CACAAGTAGATGTAGTTGACT	+	21	1
29640	CACAAGTAGGTGTAGTTAACT	+	21	2
29640	CACAAGTAGGTGTAGTTAACTTT	+	23	1
29640	CACAGGTAGATGTAGTTAACT	+	21	1
29640	CCCAAGTAGATGTAGTTAACTTT	+	23	1
29640	CGCAAGTAGATGTAGTTAACTTT	+	23	1
29640	TACAAGTAGATGTAGTTAACTTT	+	23	1
29641	ACAAGTAGATGTAGTTAACTT	+	21	3
29641	ACAAGTAGATGTAGTTAACTTC	+	22	1
29641	ACAAGTAGATGTAGTTAACTTT	+	22	7
29641	ACAAGTAGATGTAGTTAACTTTA	+	23	4
29642	CAAGTAGATGTAGTAAACTTT	+	21	1
29642	CAAGTAGATGTAGTTAACTTAA	+	22	1
29642	CAAGTAGATGTAGTTAACTTC	+	21	1
29642	CAAGTAGATGTAGTTAACTTT	+	21	20
29642	CAAGTAGATGTAGTTAACTTTA	+	22	22
29642	CAAGTAGATGTAGTTAACTTTAA	+	23	5
29642	CAAGTAGATGTAGTTTACTTT	+	21	2
29643	AAGTAGAAGTAGTTAACTTTA	+	21	1
29643	AAGTAGAGGTAGTTAACTTTAAT	+	23	1
29643	AAGTAGATGTAGTTAACTTTA	+	21	12
29643	AAGTAGATGTAGTTAACTTTAA	+	22	1
29643	AAGTAGATGTAGTTAACTTTAAT	+	23	16
29643	ATGTAGATGTAGTTAACTTTAAT	+	23	1
29644	AGAAGATGTAGTTAACTTTAATC	+	23	1
29644	AGTAGATGTAGGTAACTTTAAT	+	22	1
29644	AGTAGATGTAGTTAACTATAA	+	21	1
29644	AGTAGATGTAGTTAACTATAATC	+	23	2
29644	AGTAGATGTAGTTAACTTCAATC	+	23	1
29644	AGTAGATGTAGTTAACTTTAA	+	21	11
29644	AGTAGATGTAGTTAACTTTAAC	+	22	2
29644	AGTAGATGTAGTTAACTTTAAT	+	22	32
29644	AGTAGATGTAGTTAACTTTAATA	+	23	1
29644	AGTAGATGTAGTTAACTTTAATC	+	23	79
29644	AGTAGATGTAGTTAACTTTAATT	+	23	13
29644	AGTAGATGTAGTTAACTTTAG	+	21	1
29644	AGTAGATGTAGTTAACTTTATT	+	22	5
29644	GGTAGATGTAGTTAACTTTAATC	+	23	1
29644	TGTAGATGTAGTTAACTTTAATC	+	23	1
29645	GTAGAAGTAGTTAACTTTAATCT	+	23	1
29645	GTAGATGTAGTTAACATTAATC	+	22	1
29645	GTAGATGTAGTTAACTATAATCT	+	23	1
29645	GTAGATGTAGTTAACTTTAAC	+	21	1
29645	GTAGATGTAGTTAACTTTAATC	+	22	50
29645	GTAGATGTAGTTAACTTTAATCA	+	23	2
29645	GTAGATGTAGTTAACTTTAATCC	+	23	3
29645	GTAGATGTAGTTAACTTTAATCG	+	23	1
29645	GTAGATGTAGTTAACTTTAATCT	+	23	72
29645	GTAGATGTAGTTAACTTTAATT	+	22	2
29645	GTAGATGTAGTTTACTTTAATCT	+	23	2
29645	GTAGATGTGGTTAACTTTAAT	+	21	1
29645	GTAGGTGTAGTTAACTTTAATC	+	22	1
29645	GTCGATGTAGTTAACTTTAATC	+	22	1
29646	AAGATGTAGTTAACTTTAATCT	+	22	2
29646	GAGATGTAGTTAACTTTAATC	+	21	1
29646	GAGATGTAGTTAACTTTAATCT	+	22	2
29646	TAGAAGTAGTTAACTTTAATCT	+	22	1
29646	TAGATATAGTTAACTTTAATCT	+	22	1
29646	TAGATGAAGTTAACTTTAATCT	+	22	1
29646	TAGATGTAGTAAACTTTAATCT	+	22	1
29646	TAGATGTAGTTAACCTTAATCT	+	22	1
29646	TAGATGTAGTTAACTTCAATCT	+	22	1
29646	TAGATGTAGTTAACTTTAATC	+	21	32
29646	TAGATGTAGTTAACTTTAATCA	+	22	5
29646	TAGATGTAGTTAACTTTAATCC	+	22	16
29646	TAGATGTAGTTAACTTTAATCG	+	22	1
29646	TAGATGTAGTTAACTTTAATCT	+	22	155
29646	TAGATGTAGTTAACTTTAATCTC	+	23	5
29646	TAGATGTAGTTAACTTTAATT	+	21	1
29646	TAGATGTAGTTAACTTTAATTT	+	22	2
29646	TAGATGTAGTTAGCTTTAATCT	+	22	1
29646	TAGATGTGGTTAACTTTAATCT	+	22	1
29646	TGGATGTAGTTAACTTTAATC	+	21	1
29646	TTGATGTAGTTAACTTTAATCT	+	22	1
29647	AGATGTAGCTAACTTTAATCT	+	21	1
29647	AGATGTAGTTAACTTTAAGCT	+	21	1
29647	AGATGTAGTTAACTTTAATCA	+	21	1
29647	AGATGTAGTTAACTTTAATCC	+	21	2
29647	AGATGTAGTTAACTTTAATCG	+	21	2
29647	AGATGTAGTTAACTTTAATCT	+	21	63
29647	AGATGTAGTTAACTTTAATCTC	+	22	3
29647	AGATGTAGTTAACTTTAATCTCA	+	23	3
29647	AGATGTAGTTAACTTTAATCTCT	+	23	1
29647	AGATGTAGTTAACTTTAGTCT	+	21	1
29647	AGATGTGGTTAACTTTAATCT	+	21	1
29647	GGATGTAGTTAACTTTAATCT	+	21	1
29648	AATGTAGTTAACTTTAATCTC	+	21	1
29648	GAAGTAGTTAACTTTAATCTCAC	+	23	1
29648	GATGTAGTTAACCTTAATCTC	+	21	1
29648	GATGTAGTTAACTTTAATCTC	+	21	33
29648	GATGTAGTTAACTTTAATCTCA	+	22	14
29648	GATGTAGTTAACTTTAATCTCAC	+	23	12
29648	GATGTAGTTAACTTTAATCTCT	+	22	1
29648	GATGTAGTTAACTTTGATCTCA	+	22	1
29648	GATGTAGTTAGCTTTAATCTC	+	21	1
29648	TATGTAGTTAACTTTAATCTCA	+	22	1
29648	TATGTAGTTAACTTTAATCTCAC	+	23	1
29649	ATGTAGTAAACTTTAATCTCAC	+	22	1
29649	ATGTAGTTAACTCTAATCTCACA	+	23	1
29649	ATGTAGTTAACTTTAATCACACA	+	23	2
29649	ATGTAGTTAACTTTAATCCCACA	+	23	3
29649	ATGTAGTTAACTTTAATCTCA	+	21	15
29649	ATGTAGTTAACTTTAATCTCAC	+	22	22
29649	ATGTAGTTAACTTTAATCTCACA	+	23	120
29649	ATGTAGTTAACTTTAATCTCACG	+	23	3
29649	ATGTAGTTAACTTTAATCTCAT	+	22	2
29649	ATGTAGTTAACTTTAATCTCG	+	21	1
29649	ATGTAGTTAGCTTTAATCTCAC	+	22	1
29649	ATGTAGTTAGCTTTAATCTCACA	+	23	1
29649	ATGTAGTTGACTTTAATCTCACA	+	23	1
29649	CTGTAGTTAACTTTAATCTCACA	+	23	1
29650	AGTAGTTAACTTTAATCTCAC	+	21	1
29650	AGTAGTTAACTTTAATCTCACA	+	22	1
29650	GGTAGTTAACTTTAATCTCAC	+	21	1
29650	TGTAGTAAACTTTAATCTCACA	+	22	1
29650	TGTAGTAAACTTTAATCTCACAT	+	23	1
29650	TGTAGTTAACATTAATCTCACA	+	22	1
29650	TGTAGTTAACTTTAATCTCAC	+	21	5
29650	TGTAGTTAACTTTAATCTCACA	+	22	32
29650	TGTAGTTAACTTTAATCTCACAT	+	23	1
29650	TGTAGTTAACTTTAATCTCACT	+	22	1
29650	TGTGGTTAACTTTAATCTCACA	+	22	1
29651	GTAGTTAACTTTAATCTCACA	+	21	1
29651	GTAGTTAACTTTAATCTCACAT	+	22	1
29652	AAGTTAACTTTAATCTCACATAG	+	23	1
29652	TAGCTAACTTTAATCTCACATA	+	22	1
29652	TAGTAAACTTTAATCTCACATA	+	22	1
29652	TAGTAAACTTTAATCTCACATAG	+	23	2
29652	TAGTTAACTGTAATCTCACATAG	+	23	1
29652	TAGTTAACTTTAATCACACAT	+	21	1
29652	TAGTTAACTTTAATCTCACAA	+	21	2
29652	TAGTTAACTTTAATCTCACAAA	+	22	1
29652	TAGTTAACTTTAATCTCACATA	+	22	30
29652	TAGTTAACTTTAATCTCACATAA	+	23	4
29652	TAGTTAACTTTAATCTCACATAG	+	23	112
29652	TAGTTAACTTTAATCTCACATGG	+	23	1
29652	TAGTTAACTTTAATCTCACGT	+	21	1
29652	TAGTTAACTTTATTCTCACATAG	+	23	1
29652	TAGTTAACTTTGATCTCACAT	+	21	1
29652	TTGTTAACTTTAATCTCACAT	+	21	1
29652	TTGTTAACTTTAATCTCACATA	+	22	1
29653	AGTTAACTTTAATCTCACATAGC	+	23	1
29653	AGTTAACTTTAATCTCACATG	+	21	1
29654	GTTAACTTTAATCTCACATAG	+	21	6
29654	GTTAACTTTAATCTCACATAGCA	+	23	5
29655	TTAACTTTAATCTCACATAGC	+	21	3
29655	TTAACTTTAATCTCACATAGCA	+	22	5
29655	TTAACTTTAATCTCACATAGCAA	+	23	1
29655	TTAACTTTAATCTCACATAGTA	+	22	1
29656	TAACTTTAATCTCACATAGCA	+	21	1
29656	TAACTTTAATCTCACATAGCAA	+	22	1
29656	TAACTTTAATCTCACATAGCAAT	+	23	1
29657	AACTTAAATCTCACATAGCAA	+	21	1
29657	AACTTTAATCTCACAAAGCAA	+	21	1
29657	AACTTTAATCTCACATAGCAA	+	21	2
29657	AACTTTAATCTCACATAGCAAT	+	22	2
29657	AACTTTAATCTCACATAGCAATC	+	23	4
29657	AACTTTAATCTCACATAGCAATT	+	23	1
29657	AACTTTAATCTCGCATAGCAAT	+	22	1
29657	GACTTTAATCTCACATAGCAAT	+	22	1
29658	ACTTTAATCTCACATAGCAAT	+	21	1
29658	ACTTTAATCTCACATAGCAATC	+	22	7
29658	ACTTTAATCTCACATAGCAATCA	+	23	1
29658	ACTTTAATCTCACATAGCAATCT	+	23	2
29659	CTTTAATCTCACATAGCAATCC	+	22	1
29659	CTTTAATCTCACATAGCAATCTT	+	23	3
29661	TTAATCTCACATAGCAATCTTT	+	22	1
29662	TAATCTCACATAGCAATCTTTAA	+	23	3
29663	AATCTCACATAGCAATCTTTA	+	21	2
29663	AATCTCACATAGCAATCTTTAAT	+	23	4
29663	AATCTCACATAGCACTCTTTA	+	21	1
29664	ATCTCACATAGCAACCTTTAAT	+	22	1
29664	ATCTCACATAGCAATCTTTAA	+	21	1
29664	ATCTCACATAGCAATCTTTAAT	+	22	10
29664	ATCTCACATAGCAATCTTTAATC	+	23	1
29665	TCTCACATAGCAATCTTTAAT	+	21	9
29665	TCTCACATAGCAATCTTTAATC	+	22	3
29666	CTCACATAGCAATCTTTAATC	+	21	6
29666	CTCACATAGCAATCTTTAATCA	+	22	2
29666	CTCACATAGCAGTCTTTAATC	+	21	1
29667	TCACATAGCAATCTTTAATCAGT	+	23	1
29668	CACATAGCAATCTTTAATCAG	+	21	3
29668	CACATAGCAATCTTTAATCAGT	+	22	4
29669	ACATAGCAATCTTTAATCAGTG	+	22	2
29670	CATAGCAATCTTTAATCAGTG	+	21	3
29670	CATAGCAATCTTTAATCAGTGT	+	22	1
29670	CATAGCAATCTTTAGTCAGTGT	+	22	1
29670	CATAGCAGTCTTTAATCAGTGT	+	22	1

## Sheet: Figure S5
Figure S5. Sequences of 21-23 nt positive and negative vsRNAs at 5' terminus of ZIKV genome.
Positive strand						Negative strand
Start	Seq	Strand	Length	Counts		Start	Seq	Strand	Length	Counts
10	TCTGTGTGAGTCAGACTGCGAC	+	22	2		1	AGTTGTTGATCTGTGTGAGTC	-	21	1
1	AGGTGTTGATCTGTGTGAGTC	+	21	1		1	AGTTGTTGATCTGTGTGAGTCA	-	22	3
1	AGTTGTTGATCTGTGTGAGTC	+	21	5		1	AGTTGTTGATCTGTGTGAGTCAG	-	23	11
1	AGTTGTTGATCTGTGTGAGTCA	+	22	7		24	ACTGCGACAGCTCGAGTCTGAAG	-	23	1
1	AGTTGTTGATCTGTGTGAGTCAG	+	23	1		24	ACTGCGACAGTTCGAGTCTGAA	-	22	3
1	AGTTGTTGATCTGTGTGAGTCC	+	22	1		24	ACTGCGACAGTTCGAGTCTGAAG	-	23	2
1	TGTTGTTGATCTGTGTGAGTCA	+	22	1		24	ACTGCGACAGTTCGGGTCTGAAG	-	23	1
23	GACTGCGACAGTTCGAGTCTGA	+	22	3		2	GTTGTTGATCTGTGTGACTCA	-	21	1
23	GACTGCGACAGTTCGAGTCTGT	+	22	1		2	GTTGTTGATCTGTGTGAGTCA	-	21	1
26	TGCGACAGTTCGAGTCTGAAG	+	21	1		2	GTTGTTGATCTGTGTGAGTCAGA	-	23	1
26	TGCGACAGTTCGAGTCTGAAGC	+	22	9		3	TTGTTGATCTGTGTGAGTCAGA	-	22	1
26	TGCGACAGTTCGAGTCTGAAGCG	+	23	2		42	TGAAGCGAGAGCTAACAACAGT	-	22	2
27	GCGACAGTTCGAGTCTGAAGC	+	21	1		43	AAAGCGAGAGCTAACAACAGTA	-	22	1
27	GCGACAGTTCGAGTCTGAAGCC	+	22	1		43	GAAGCGAGAGCCAACAACAGTA	-	22	1
27	GCGACAGTTCGAGTCTGAAGCG	+	22	3		43	GAAGCGAGAGCTAACAACAGTA	-	22	8
27	GCGACAGTTCGAGTCTGAAGCGT	+	23	2		44	AAGCGAGAGCTAACAACAGTA	-	21	1
28	CGACAGTTCGAGTCTGAAGCG	+	21	1		44	AAGCGAGAGCTAACAACAGTAT	-	22	1
28	CGACAGTTCGAGTCTGAGGCG	+	21	2		46	ACGAGAGCTAACAACAGTATCAA	-	23	2
28	GGACAGTTCGAGTCTGAAGCG	+	21	1		46	GCGAGAGCCAACAACAGTATCAA	-	23	1
31	CAGTTCGAGTCTGAAGCGAGA	+	21	1		46	GCGAGAGCTAACAACAGTATCAA	-	23	1
32	AGTTCGAGTCTGAAGCGAGAGC	+	22	1		47	AGAGAGCTAACAACAGTATCAA	-	22	1
32	AGTTCGAGTCTGAAGCGAGAGCT	+	23	1		47	CGAGAGCCAACAACAGTATCAA	-	22	3
32	AGTTCGAGTCTGAGGCGAGAGC	+	22	1		47	CGAGAGCTAACAACAGTATCAA	-	22	13
34	TTCGAGTCTGAAGCGAGAGCTA	+	22	1		47	CGAGAGCTAACATCAGTATCAA	-	22	1
36	CGAGTCTGAAGCGAGAGCTAAC	+	22	1		47	GGAGAGCTAACAACAGTATCA	-	21	1
3	TCGTTGATCTGTGTGAGTCAGA	+	22	1		47	GGAGAGCTAACAACAGTATCAA	-	22	1
3	TTGTTGATCTGTGTGAGTCAGA	+	22	5		48	GAGAGCCAACAACAGTATCAA	-	21	1
3	TTGTTGATCTGTGTGAGTCAGAC	+	23	1		48	GAGAGCTAACAACAGTATCAA	-	21	6
3	TTGTTGATCTGTGTGAGTCAGT	+	22	2		52	GCTAACAACAGTATCAACAGGT	-	22	1
42	TGAAGCGAGAGCTAACAACAGT	+	22	2		63	TATCAACAGGTTTAATTTGGAT	-	22	1
49	AGAGCTAACAACAGTATCAACA	+	22	1		64	ATCAACAGGTTTAATTTGGAT	-	21	1
4	TGTTGATCTGTGTGAGTCAGAC	+	22	1		68	ACAGGTTTAACTTGGATTTGGA	-	22	1
4	TGTTGATCTGTGTGAGTCAGACC	+	23	1		68	GCAGGTTTAATTTGGATTTGGA	-	22	1
4	TGTTGATCTGTGTGAGTCAGACT	+	23	5		69	CAGGTTTAATTTGGATTTGGA	-	21	5
50	GAGCTAACAACAGTATCAACA	+	21	1		69	CAGGTTTAATTTGGATTTGGAAA	-	23	1
51	AGCTAACAACAGTATCAACAGG	+	22	2		87	GGAAACGAGAGTTTCTGGTCAT	-	22	2
5	GTTGATCTGTGTGAGTCAGAC	+	21	3		88	GAAACGAGAGTTTCTGGTCAT	-	21	1
5	GTTGATCTGTGTGAGTCAGACC	+	22	3		89	AAACGAGAGTTTCTGGTCATGAA	-	23	1
5	GTTGATCTGTGTGAGTCAGACT	+	22	22		92	CGAGAGTTTCTGGTCATGAAAA	-	22	4
67	AACAGGTTTAATTTGGATTTG	+	21	1		92	CGAGAGTTTCTGGTGATGAAAA	-	22	1
67	AACAGGTTTAATTTGGATTTGGT	+	23	1		92	GGAGAGTTTCTGGTCATGAAAA	-	22	2
6	TTGATCTGTGTGAGTCAGACT	+	21	7		93	GAGAGTTTCTGGTCATGAAAA	-	21	1
71	GGTTTAATTTGGATTTGGAAAC	+	22	1
71	GGTTTAATTTGGATTTGGAAACA	+	23	1
71	GGTTTAATTTGGATTTGGAAACC	+	23	1
71	GGTTTAATTTGGATTTGGAAACG	+	23	4
74	TTAATTTGGATTTGGAAACGA	+	21	1
76	AATTTGGATTTGGAAACGAGAGT	+	23	1
79	TTGGATTTGGAAACGAGAGTTTC	+	23	1
7	TGATCTGTGTGAGTCAGACTG	+	21	1
80	TGGATTTGGAAACGAGAGTTTCT	+	23	1
82	GATTTGGAAACGAGAGTTTCTG	+	22	1
84	TTTGGAAACGAGAGTTTCTGGTC	+	23	1
90	AACGAGAGTTTCTGGTCATGAA	+	22	1
90	AACGAGAGTTTCTGGTCATGAAT	+	23	1
90	AACGAGAGTTTCTGGTCATGT	+	21	1
94	AGAGTTTCTGGTCATGAAAAAC	+	22	1
94	AGAGTTTCTGGTCATGAAAAACT	+	23	1
96	AGTTTCTGGTCATGAAAAACC	+	21	1
96	AGTTTCTGGTCATGAAAAACCC	+	22	2
97	GTTTCTGGTCATGAAAAACCC	+	21	1
