# Supplementary material for: SARS-CoV-2 RNAs are processed into 22-nt vsRNAs in Vero cells
Source: Front Immunol. 2022 Oct 28;13:1008084. doi: 10.3389/fimmu.2022.1008084 (PMC9650353; doi:10.3389/fimmu.2022.1008084)
Supplement: Supplementary file 2 [file Table_1.xlsx]

## Sheet: Supplemental Table 1
Table S1. Summary of sRNA-seq library in control and SARS-CoV-2-infected Vero cells.
Sample	Total Reads	Clean reads	Matched to human genome	Clean reads matched to human genome (without rRNA & tRNA)	22-23nt sRNA (without rRNA & tRNA)	Count							Proportion
						miRNA	rRNA	tRNA	piRNA	vsRNA	Unannotated	Others	miRNA	rRNA	tRNA	piRNA	vsRNA	Unannotated	Others	22-23nt sRNA/matched to human genome (without rRNA & tRNA)
Vero-Control-6h-1	22344854	21534687	18566949	16568982	10880868	14982524	1672847	325120	2721	10	3802515	748950	0.695739	0.0776815	0.0150975	0.000126354	4.64367e-07	0.176576	0.0347788	0.656701
Vero-Control-6h-2	25434375	24381740	21343612	17848752	10805589	15904916	3121936	372924	4807	4	4311840	665313	0.652329	0.128044	0.0152952	0.000197156	1.64057e-07	0.176847	0.0272873	0.605397
Vero-Control-12h-1	21256902	20776083	17539039	16811276	10469924	14505916	477183	250580	3396	4	4986915	552089	0.698203	0.0229679	0.012061	0.000163457	1.92529e-07	0.240032	0.0265733	0.622792
Vero-Control-12h-2	21605195	21057657	17634171	15485540	9814834	13517046	1939344	209287	3541	4	4824467	563968	0.641906	0.0920969	0.00993876	0.000168157	1.89955e-07	0.229107	0.0267821	0.633806
Vero-SARS-CoV-2-6h-1	20420186	19966360	16200453	14186572	8653933	12388524	1649195	364686	2561	101038	4613074	847282	0.62047	0.0825987	0.018265	0.000128266	0.00506041	0.231042	0.0424355	0.610009
Vero-SARS-CoV-2-6h-2	23378255	22315495	19482663	17638507	10494181	14753888	1342017	502139	5078	17673	4826628	868072	0.66115	0.0601383	0.0225018	0.000227555	0.000791961	0.21629	0.0389	0.594959
Vero-SARS-CoV-2-12h-1	24502538	23826408	19574237	17489042	10338786	14316474	1384992	700203	4944	540021	6029124	850650	0.600866	0.0581284	0.0293877	0.000207501	0.0226648	0.253044	0.035702	0.591158
Vero-SARS-CoV-2-12h-2	33539961	32432691	26682098	23836273	13938512	19389636	1978961	866864	6887	563453	8418185	1208705	0.597842	0.0610175	0.0267281	0.000212347	0.017373	0.259559	0.0372681	0.584761
Vero-Control-6h (combined)	47779229	45916427	39910561	34417734	21686457	30887440	4794783	698044	7528	14	8114355	1414263	0.672688	0.104424	0.0152025	0.00016395	3.04902e-07	0.17672	0.0308008	0.630095
Vero-Control-12h (combined)	42862097	41833740	35173210	32296816	20284758	28022962	2416527	459867	6937	8	9811382	1116057	0.669865	0.057765	0.0109927	0.000165823	1.91233e-07	0.234533	0.0266784	0.628073
Vero-SARS-CoV-2-6h (combined)	43798441	42281855	35683116	31825079	19148114	27142412	2991212	866825	7639	118711	9439702	1715354	0.64194	0.0707446	0.0205011	0.000180669	0.00280761	0.223257	0.0405695	0.601667
Vero-SARS-CoV-2-12h (combined)	58042499	56259099	46256335	41325315	24277298	33706110	3363953	1567067	11831	1103474	14447309	2059355	0.599123	0.0597939	0.0278545	0.000210295	0.0196141	0.2568	0.0366048	0.587468
