# Supplementary material for: SARS-CoV-2 RNAs are processed into 22-nt vsRNAs in Vero cells
Source: Front Immunol. 2022 Oct 28;13:1008084. doi: 10.3389/fimmu.2022.1008084 (PMC9650353; doi:10.3389/fimmu.2022.1008084)
Supplement: Supplementary file 3 [file Table_2.xlsx]

## Sheet: Supplemental Table 2
Table S2. Reads counts and proportion of miR-21 and its 23-nt isoforms in total clean reads matched to human genome.
miR-21(UAGCUUAUCAGACUGAUGUUGA)	miR-21	miR-21+C	miR-21+A	miR-21+U	miR-21+G	Total clean reads matched to human genome	Proportion of miR21 + 23nt isoforms
Vero-Control-6h-1	972052	3960127	66892	220452	9409	18566949	0.281626
Vero-Control-6h-2	649510	2986272	42896	167220	7185	21343612	0.180526
Vero-Control-12h-1	883402	3732780	58718	194839	7879	17539039	0.278101
Vero-Control-12h-2	822858	3592162	58550	196722	8502	17634171	0.265325
Vero-SARS-CoV-2-6h-1	555505	2521980	43530	152703	6877	16200453	0.2025
Vero-SARS-CoV-2-6h-2	683241	2575534	38786	107606	6099	19482663	0.175092
Vero-SARS-CoV-2-12h-1	954173	3061708	49017	122969	5900	19574237	0.214249
Vero-SARS-CoV-2-12h-2	1186347	4037528	65058	170046	10963	26682098	0.205004
Vero-Control-6h (combined)	1621562	6946399	109788	387672	16594	39910561	0.227559
Vero-Control-12h (combined)	1706260	7324942	117268	391561	16381	35173210	0.271696
Vero-SARS-CoV-2-6h (combined)	1238746	5097514	82316	260309	12976	35683116	0.187536
Vero-SARS-CoV-2-12h (combined)	2140520	7099236	114075	293015	16863	46256335	0.208916
