# Supplementary material for: SARS-CoV-2 RNAs are processed into 22-nt vsRNAs in Vero cells
Source: Front Immunol. 2022 Oct 28;13:1008084. doi: 10.3389/fimmu.2022.1008084 (PMC9650353; doi:10.3389/fimmu.2022.1008084)
Supplement: Supplementary file 5 [file Table_4.xlsx]

## Sheet: Sheet1
Table S4. Reads counts and proportion of 22-nt vsRNAs initiated with A/U/C/G.
	22nt vsRNA
Sample	A(+)	U(+)	C(+)	G(+)	A(-)	U(-)	C(-)	G(-)	total(-)	A+U/total(-)
Vero-SARS-CoV-2-6h-1	2445	1995	2114	1020	50	24	13	9	96	0.770833
Vero-SARS-CoV-2-6h-2	883	546	522	186	50	42	30	18	140	0.657143
Vero-SARS-CoV-2-12h-1	26216	9717	26197	5040	208	46	37	71	362	0.701657
Vero-SARS-CoV-2-12h-2	27668	9455	27988	4871	262	210	88	53	613	0.769984
Vero-SARS-CoV-2-6h (combined)	3328	2541	2636	1206	100	66	43	27	236	0.70339
Vero-SARS-CoV-2-12h (combined)	53884	19172	54185	9911	470	256	125	124	975	0.744615
(+) represents the 22-nt vsRNAs distributing at the positive strand of SARS-CoV-2 genome.
(-) represents the 22-nt vsRNAs distributing at the negative strand of SARS-CoV-2 genome.
