# Supplementary material for: SARS-CoV-2 RNAs are processed into 22-nt vsRNAs in Vero cells
Source: Front Immunol. 2022 Oct 28;13:1008084. doi: 10.3389/fimmu.2022.1008084 (PMC9650353; doi:10.3389/fimmu.2022.1008084)
Supplement: Supplementary file 6 [file Table_5.xlsx]

## Sheet: Supplemental Table 5
Table S5. vsRNAs from published small RNA libraries in different host cells upon viral infection.
Study	Virus	Host	MOI	Timepoint	SRA Number	Raw reads	Clean reads	Matched to human genome	Total vsRNAs	18-35nt vsRNAs	Total (-) vsRNAs	21-23nt vsRNAs	21-23 nt (-) vsRNAs	21-23nt (-) /total (-)%
SARS-CoV-2 expresses a microRNA-like small RNA able to selectively repress host genes	SARS-CoV-2	Calu-3	5	6 hpi	SRR15700516	20507356	19816537	19343638	266	261	27	102	3	0.111111
	SARS-CoV-2	Calu-3	5	24 hpi	SRR15700520	19559475	19272842	18802784	13291	13100	81	4475	39	0.481481
	SARS-CoV-2	Calu-3	0.05	48 hpi	SRR15700523	17842780	17503657	16698462	3066	2918	41	693	7	0.170732
	SARS-CoV-2	PC-9	5	6 hpi	SRR15700530	17701943	17450635	16434117	1393	1381	1	372	0	0
	SARS-CoV-2	PC-9	5	24 hpi	SRR15700533	18322542	17991342	17277964	23280	23126	544	7609	258	0.474265
	SARS-CoV-2	PC-9	0.05	48 hpi	SRR15700537	16718461	15957130	15443036	5179	5026	228	1929	109	0.47807
	SARS-CoV-2	A549-hACE2	5	6 hpi	SRR15700543	17024939	16779838	15874822	12732	12477	20	3480	16	0.8
	SARS-CoV-2	A549-hACE2	5	24 hpi	SRR15700546	18747197	18421942	17275206	195128	192325	3869	61544	1565	0.404497
	SARS-CoV-2	A549-hACE2	0.05	48 hpi	SRR15700549	15823822	14899784	14609349	20107	19660	520	7724	262	0.503846
A virus-derived microRNA targets immune response genes during SARS-CoV-2 infection	SARS-CoV-2	A549-hACE2	3	24 hpi	SRR13165825	52295043	27980673	24789422	38650	38378	310	17340	145	0.4677
	SARS-CoV-2	A549-hACE2	3	48 hpi	SRR13165826	51277814	32589421	29971806	300500	298035	4417	148030	2163	0.4897
Transcriptomic profiling of SARS-CoV-2 infected human cell lines identifies HSP90 as target for COVID-19 therapy	SARS-CoV-2	Calu-3	0.33	4 hpi	SRR11550030	15715237	9509531	8612877	2548	2401	31	347	7	0.2258
	SARS-CoV-2	Calu-3	0.33	12 hpi	SRR11550025	11548280	6259045	5512032	80193	79157	245	17962	85	0.3469
	SARS-CoV-2	Calu-3	0.33	24 hpi	SRR11550027	22767189	12546358	10769368	195454	190197	6318	44910	2154	0.3409
Viral MicroRNAs Encoded by Nucleocapsid Gene of SARS-CoV-2 Are Detected during Infection, and Targeting Metabolic Pathways in Host Cells	SARS-CoV-2	Calu-3	0.1	48 hpi	SRR14674271	29785804	13140676	12600574	12180	12123	108	4213	41	0.37963
	SARS-CoV-2	Calu-3	0.1	48 hpi	SRR14674272	14223085	2927026	2815280	13398	12886	80	3524	68	0.85
	SARS-CoV-2	Calu-3	0.1	48 hpi	SRR14674273	10673316	2464118	2374155	15862	15834	116	4078	90	0.775862
	SARS-CoV-2	Calu-3	0.1	48 hpi	SRR14674274	9283087	4011379	3891402	18680	18598	117	6430	82	0.700855
	SARS-CoV-2	Calu-3	0.1	48 hpi	SRR14674275	18756172	6287444	6044532	23082	22436	88	5498	72	0.818182
	SARS-CoV-2	Calu-3	0.1	48 hpi	SRR14674276	9565885	2268360	2180131	11618	11526	77	2424	40	0.519481
A high-resolution temporal atlas of the SARS-CoV-2 translatome and transcriptome	SARS-CoV-2	Calu-3	10	24 hpi	SRR12682178	10475478	10179230	9406230	9138	8491	11	2228	5	0.454545
	SARS-CoV-2	Calu-3	10	36 hpi	SRR12682179	24883176	24062248	22475816	50665	47601	329	14313	151	0.458967
	SARS-CoV-2	Calu-3	1	48 hpi	SRR12588877	26820359	25735739	24562968	31507	30598	432	14421	237	0.5486
Functional Mapping of AGO-Associated Zika Virus-Derived Small Interfering RNAs in Neural Stem Cells	Zika	NSCs	1	48 hpi	SRR12883484	29730210	27085266	22054780	6879	5410	156	1409	91	0.583333
	Zika	NSCs	1	48 hpi	SRR12883485	37227640	33113623	26943321	16138	12875	176	3466	109	0.619318
The Zika Virus Capsid Disrupts Corticogenesis by Suppressing Dicer Activity and miRNA Biogenesis	Zika	NSCs	1	48 hpi	SRR10133021	12170884	11265260	6702647	13433	6844	110	1695	54	0.490909
	Zika	NSCs	1	48 hpi	SRR10133022	13650170	12536771	7640208	13736	7008	114	1711	51	0.447368
Zika virus infection induces RNAi-mediated antiviral immunity in human neural progenitors and brain organoids	Zika	NPCs	2	24 hpi	SRR8478259	24529714	24372987	13568528	38759	37183	10276	23759	8362	0.813741
	Zika	NPCs	2	24 hpi	SRR8478258	27801388	20709464	12931783	46866	45924	12517	29198	10199	0.814812
Genome-wide Integrative Analysis of Zika-Virus-Infected Neuronal Stem Cells Reveals Roles for MicroRNAs in Cell Cycle and Stemness	Zika	NSCs	1	72 hpi	SRR7062778	12140853	1322662	1191520	34997	28817	140	6339	121	0.864286
	Zika	NSCs	1	72 hpi	SRR7062779	7124995	5492295	5246009	19055	15664	122	3464	107	0.877049
Identification of RNase L-dependent, 3'-end-modified, viral small RNAs in Sindbis virus-infected mammalian cells	Sindbis	Vero	0.01	16 hpi	SRR933997	26141953	24920548	14251952	971929	938927	13532	319837	11141	0.823308
