# Supplementary figures and images for: SARS-CoV-2 RNAs are processed into 22-nt vsRNAs in Vero cells
Source: Frontiers journal article supplement (doi:10.3389/fimmu.2022.1008084), 2022-10-28

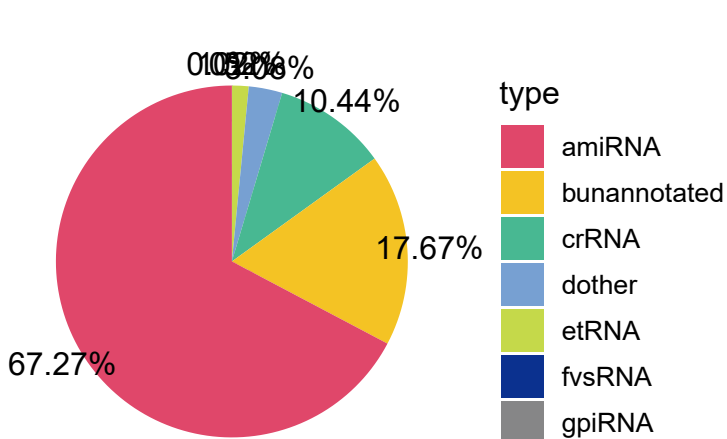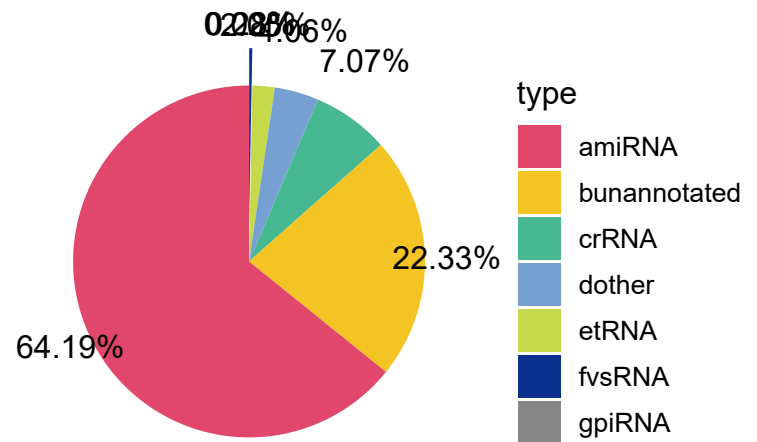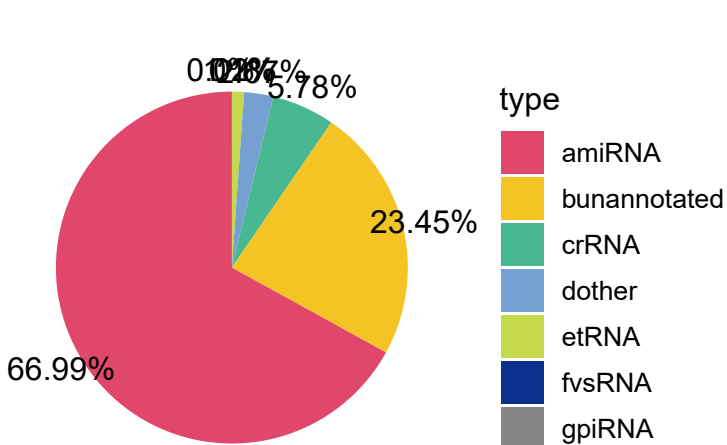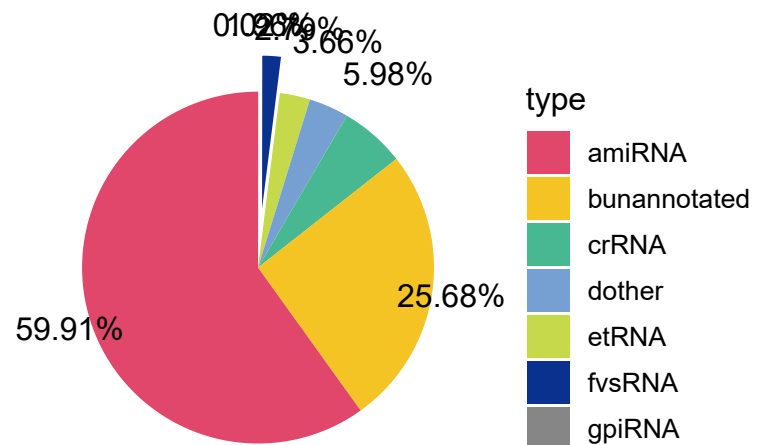

Supplement: Data_Sheet_1.zip [file pie-new.pdf › Data Sheet 1/SARS-CoV-2 source code & data/SARS-CoV-2 source code/fig1/1B/output/pie-new.pdf]

Vero-Control-6h

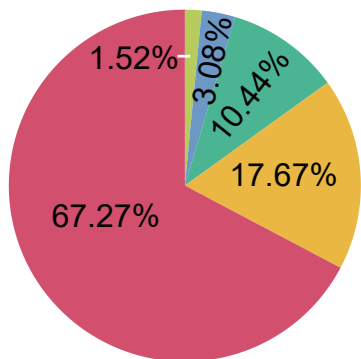

Vero-SARS-CoV-2-6h

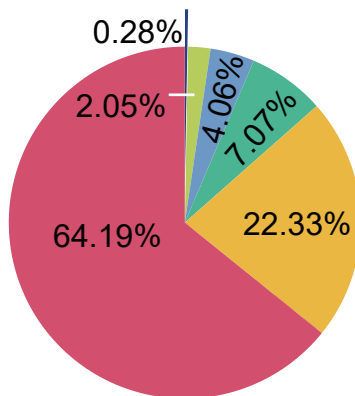

Vero-Control-12h

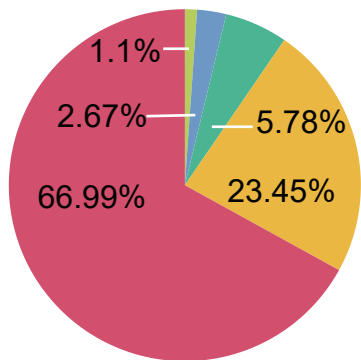

Vero-SARS-CoV-2-12h

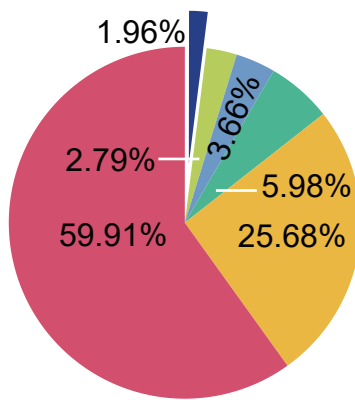

type

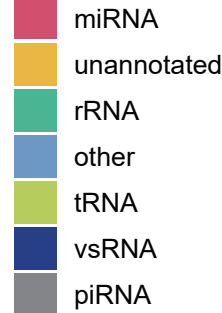

Supplement: Data_Sheet_1.zip [file pie-new_AI.pdf › Data Sheet 1/SARS-CoV-2 source code & data/SARS-CoV-2 source code/fig1/1B/output/pie-new_AI.pdf]

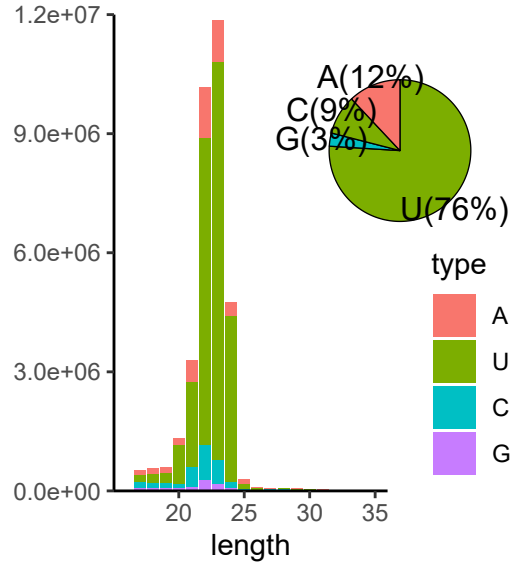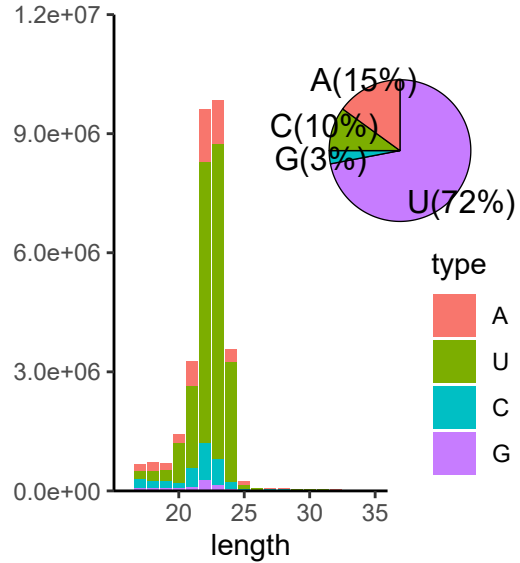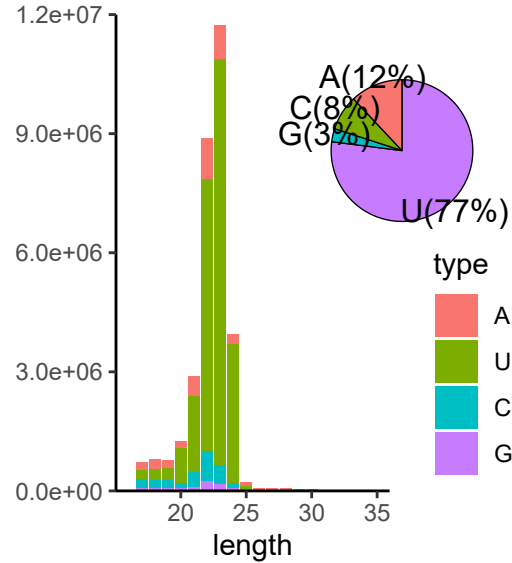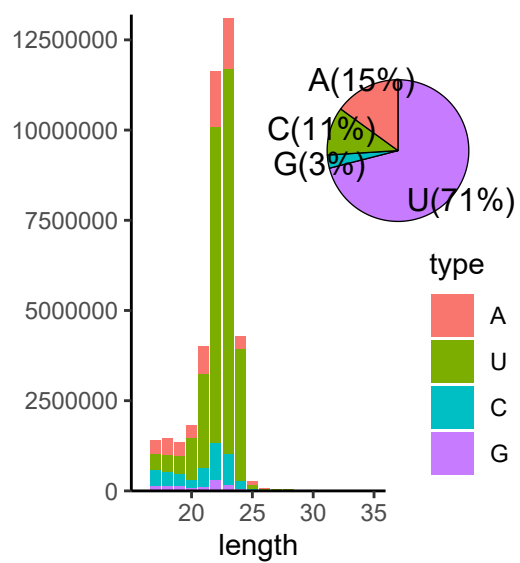

Supplement: Data_Sheet_1.zip [file nostr.pdf › Data Sheet 1/SARS-CoV-2 source code & data/SARS-CoV-2 source code/fig1/1C/output/nostr.pdf]

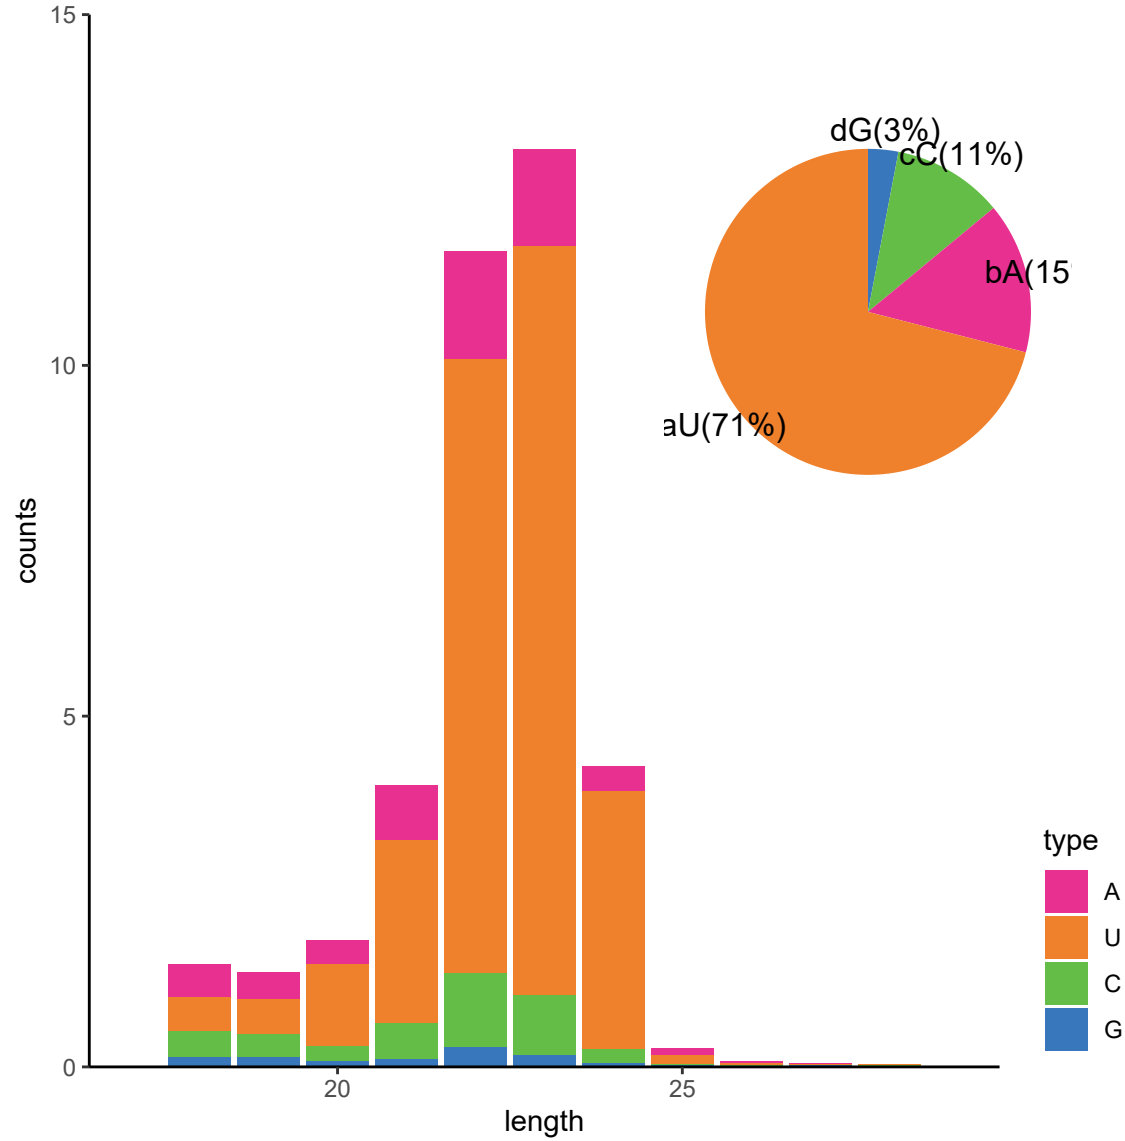

Supplement: Data_Sheet_1.zip [file vero_SARS12h.pdf › Data Sheet 1/SARS-CoV-2 source code & data/SARS-CoV-2 source code/fig1/1C/output/vero_SARS12h.pdf]

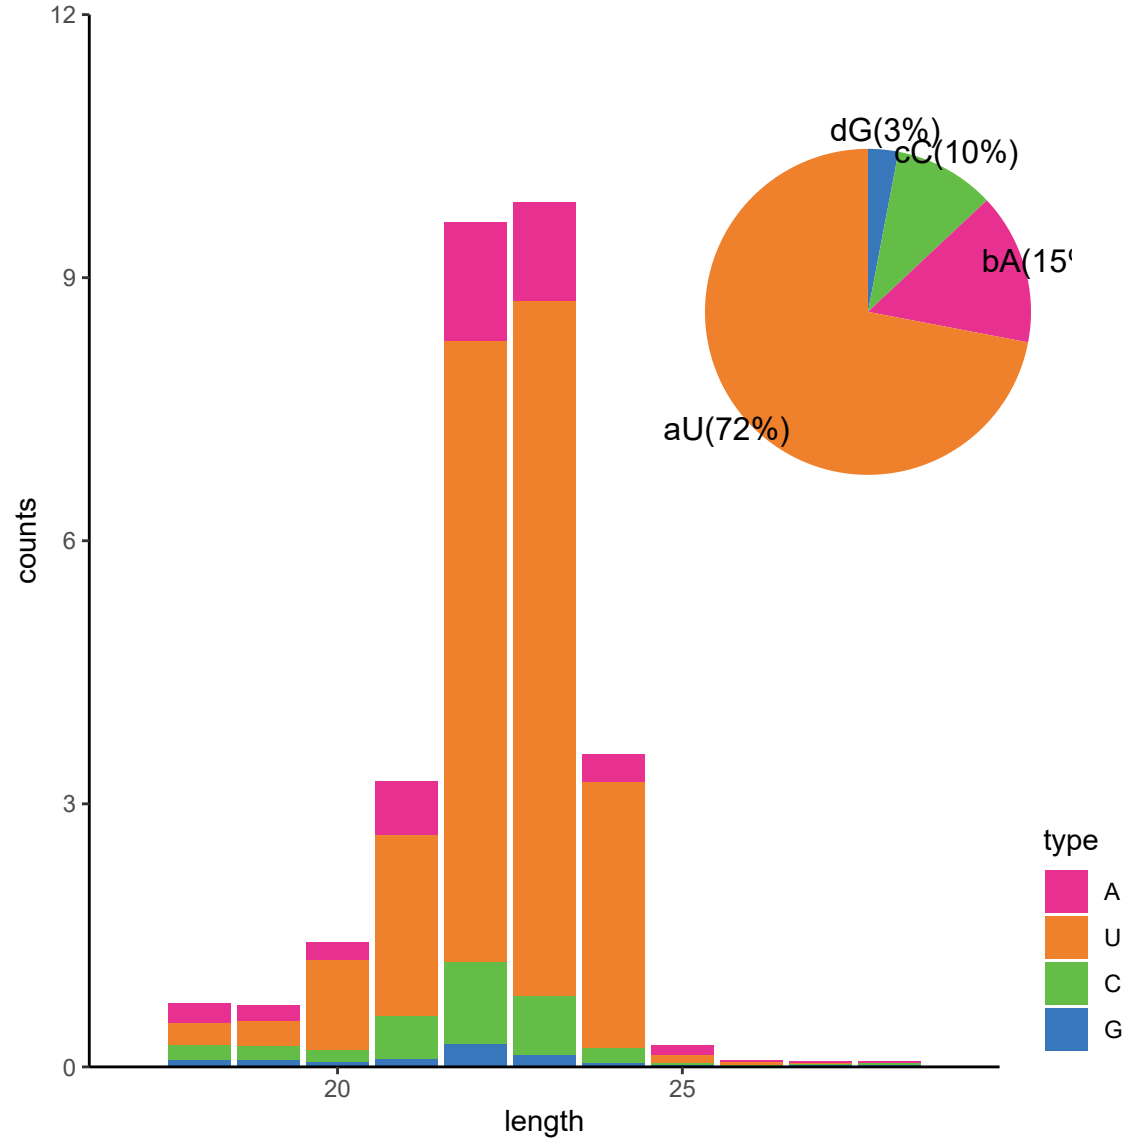

Supplement: Data_Sheet_1.zip [file vero_SARS6h.pdf › Data Sheet 1/SARS-CoV-2 source code & data/SARS-CoV-2 source code/fig1/1C/output/vero_SARS6h.pdf]

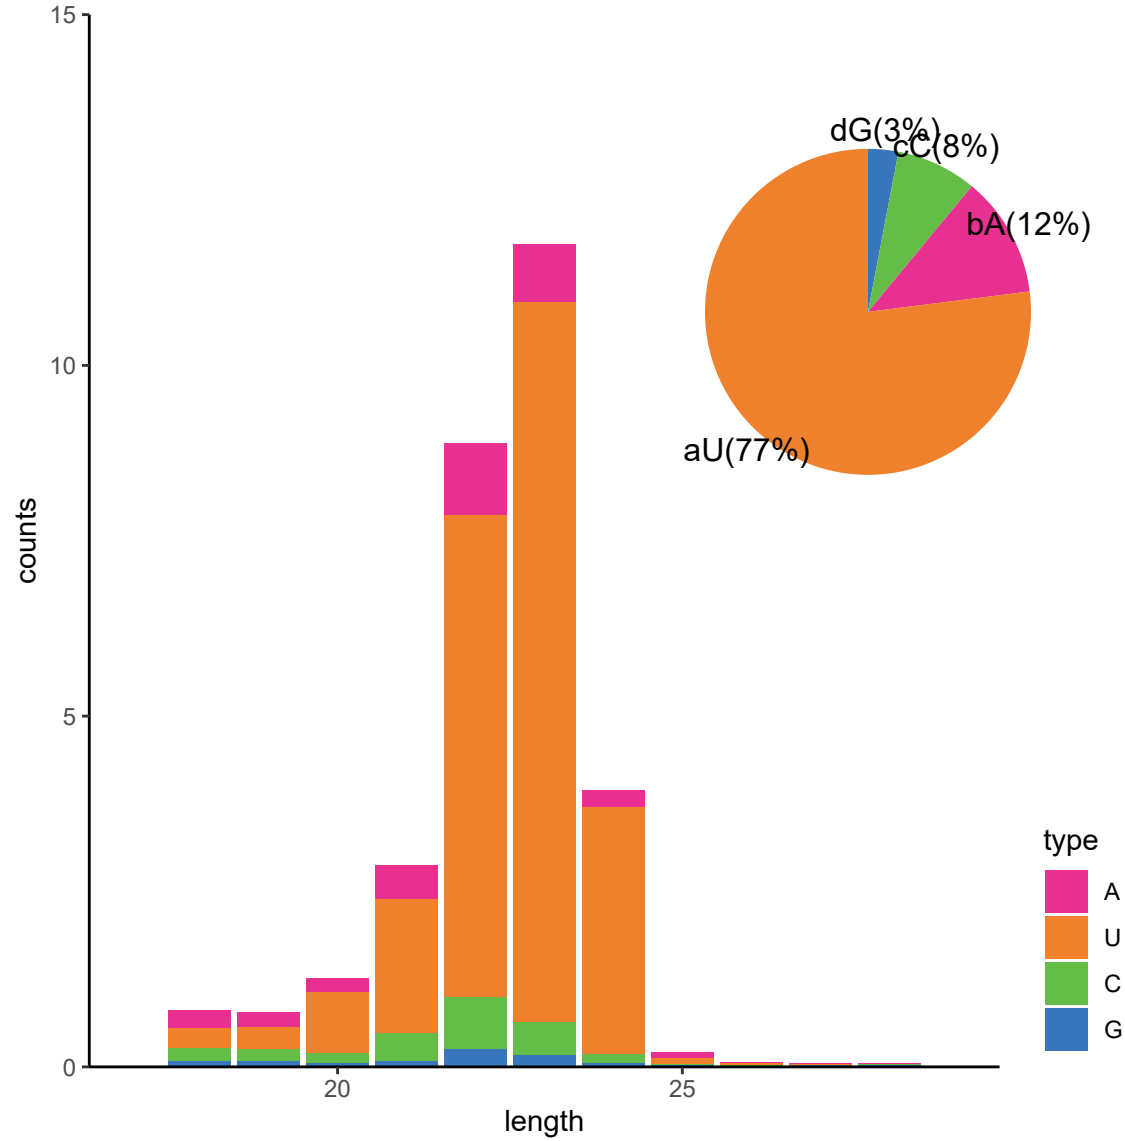

Supplement: Data_Sheet_1.zip [file vero_conrol12h.pdf › Data Sheet 1/SARS-CoV-2 source code & data/SARS-CoV-2 source code/fig1/1C/output/vero_conrol12h.pdf]

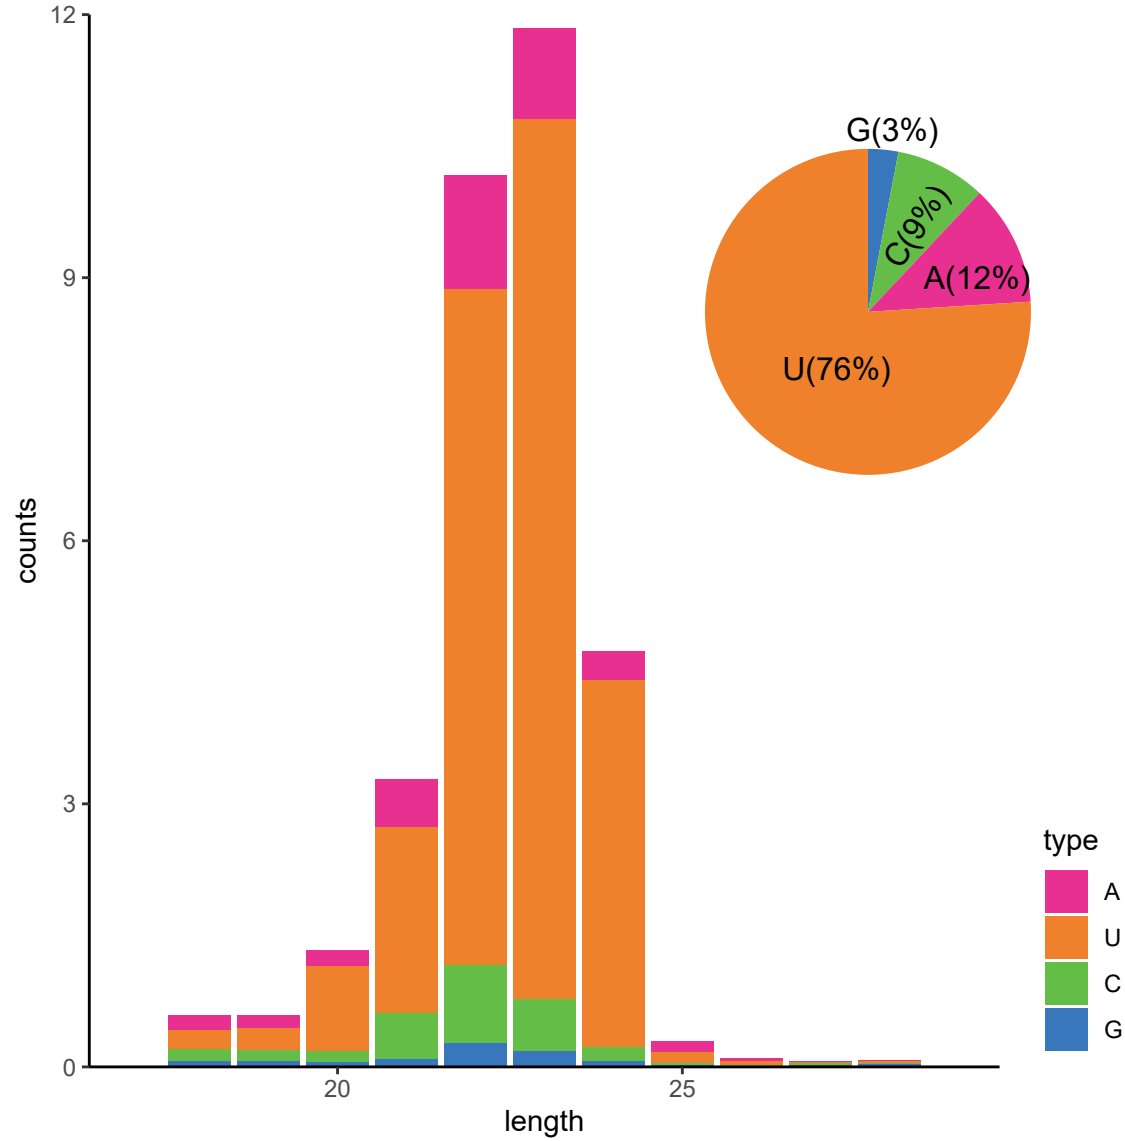

Supplement: Data_Sheet_1.zip [file vero_conrol6h.pdf › Data Sheet 1/SARS-CoV-2 source code & data/SARS-CoV-2 source code/fig1/1C/output/vero_conrol6h.pdf]

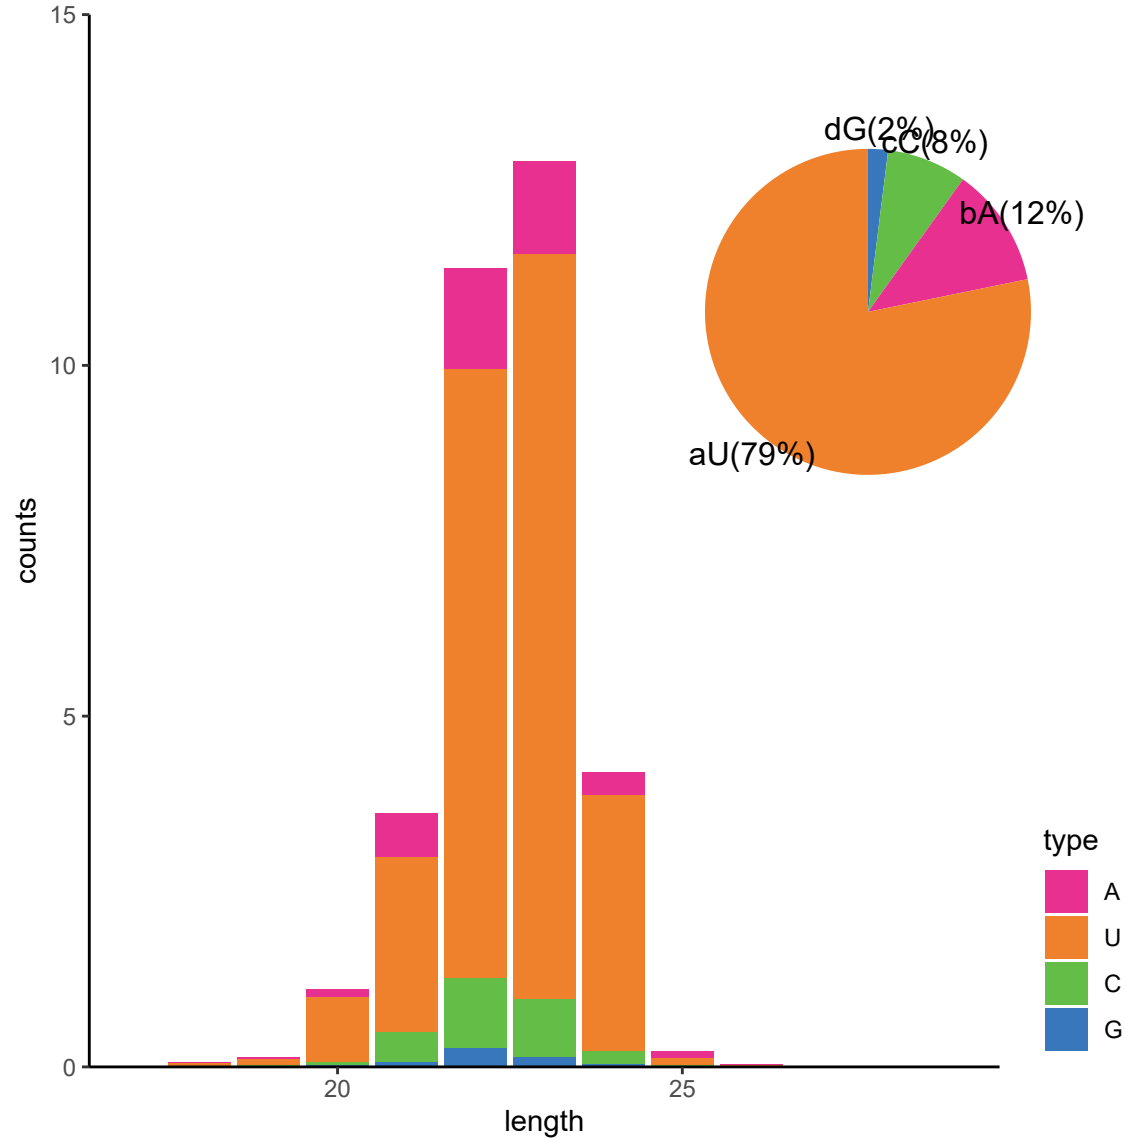

Supplement: Data_Sheet_1.zip [file Vero_SARS-CoV-2-12h-miRNA.pdf › Data Sheet 1/SARS-CoV-2 source code & data/SARS-CoV-2 source code/fig2/2A/output/Vero_SARS-CoV-2-12h-miRNA.pdf]

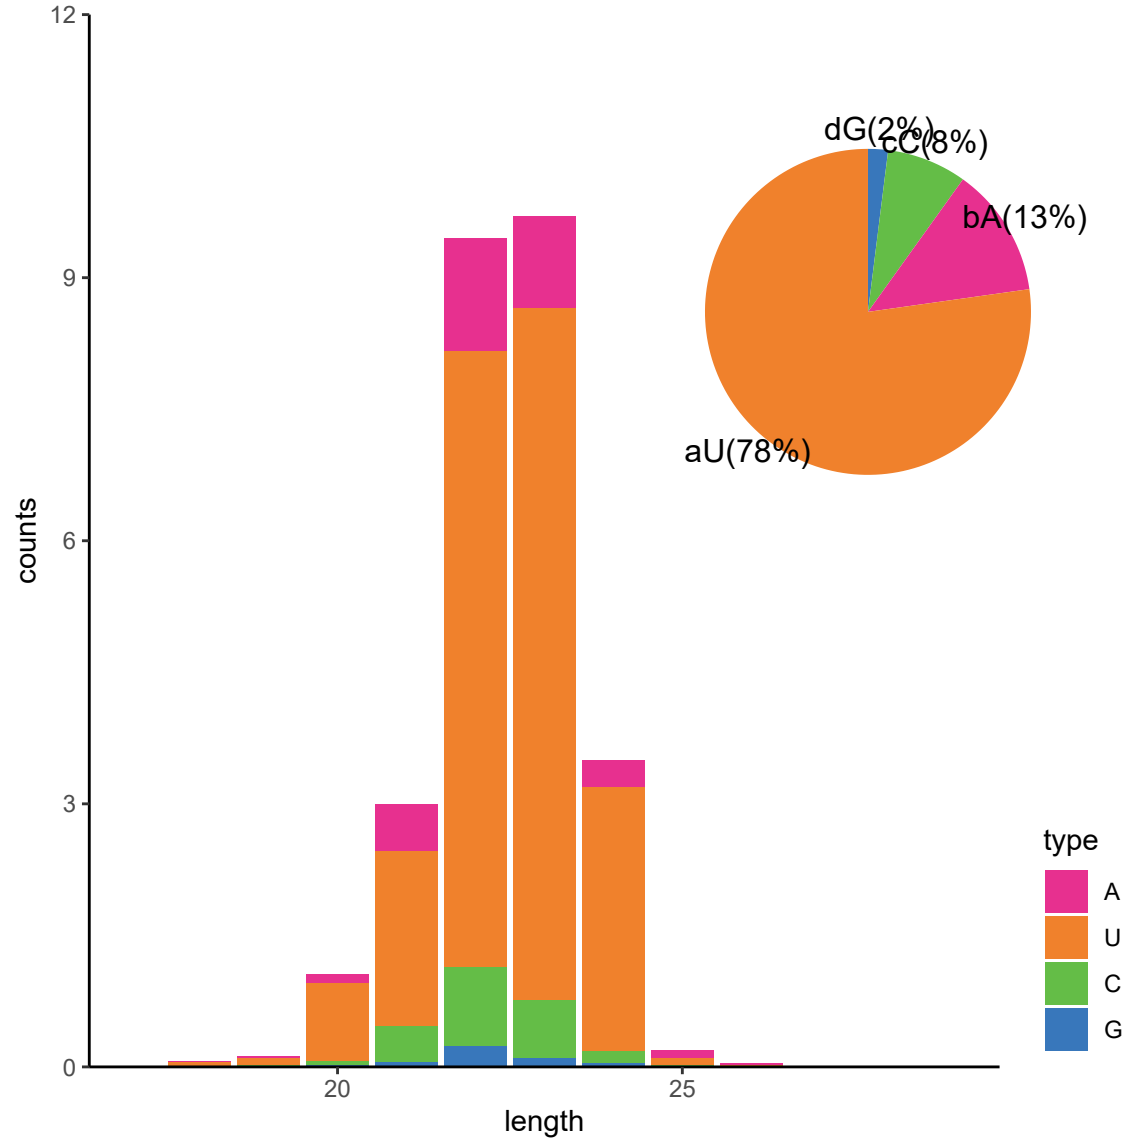

Supplement: Data_Sheet_1.zip [file Vero_SARS-CoV-2-6h-miRNA.pdf › Data Sheet 1/SARS-CoV-2 source code & data/SARS-CoV-2 source code/fig2/2A/output/Vero_SARS-CoV-2-6h-miRNA.pdf]

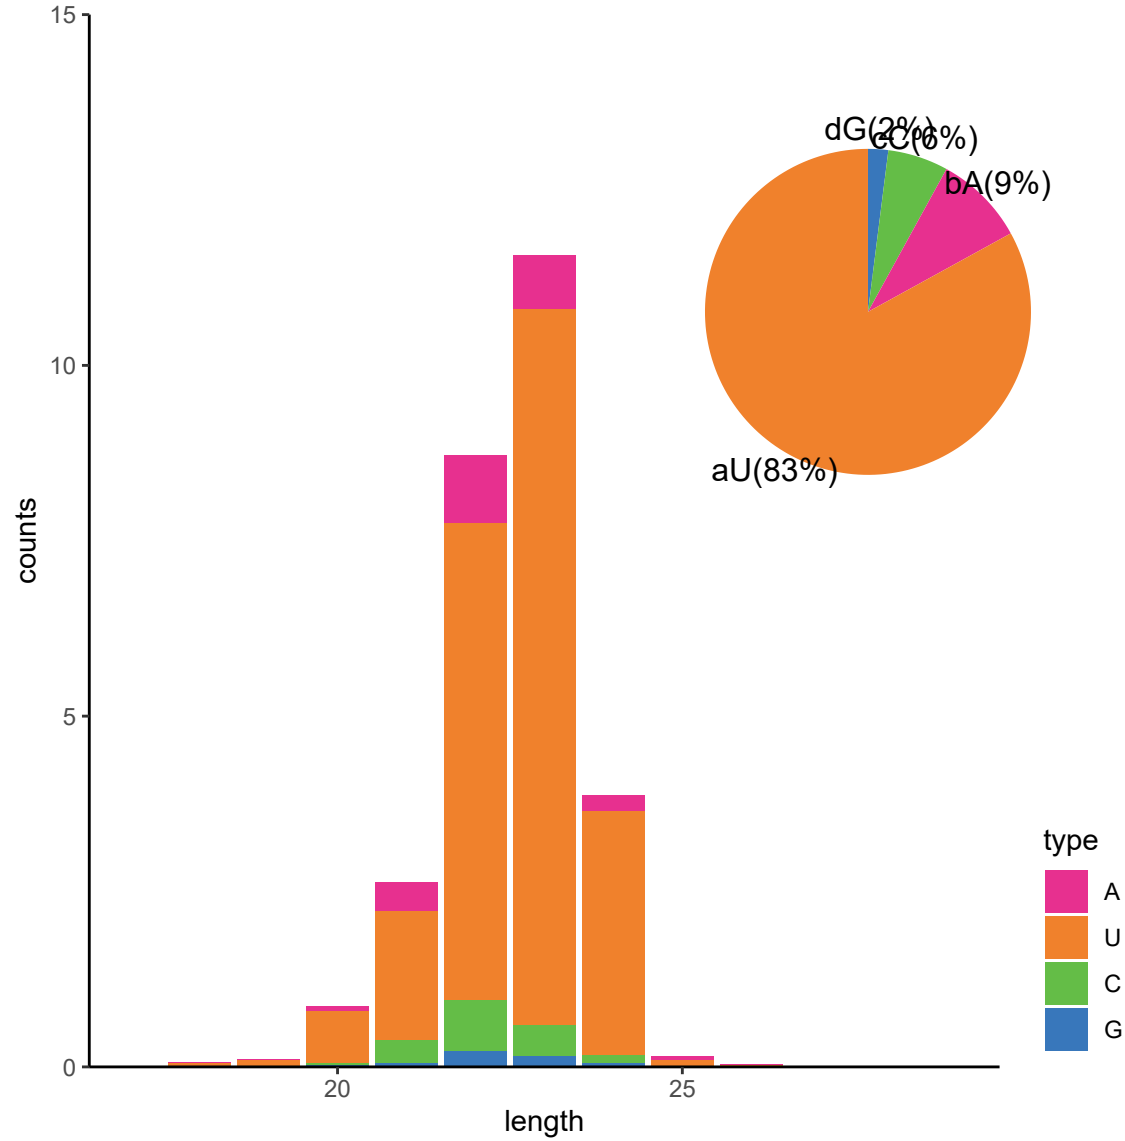

Supplement: Data_Sheet_1.zip [file Vero_control-12h-miRNA.pdf › Data Sheet 1/SARS-CoV-2 source code & data/SARS-CoV-2 source code/fig2/2A/output/Vero_control-12h-miRNA.pdf]

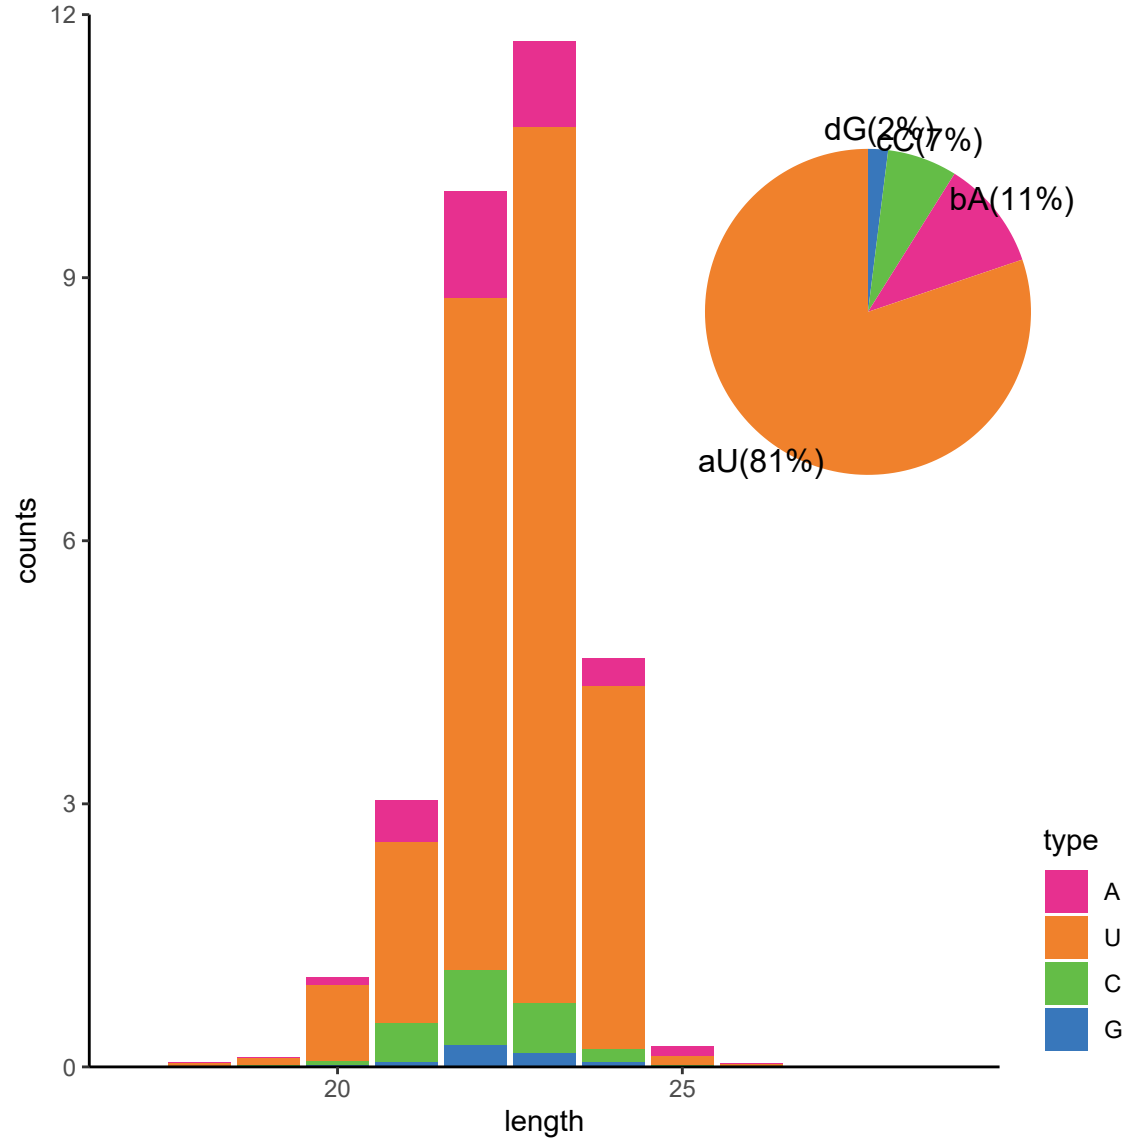

Supplement: Data_Sheet_1.zip [file Vero_control-6h-miRNA.pdf › Data Sheet 1/SARS-CoV-2 source code & data/SARS-CoV-2 source code/fig2/2A/output/Vero_control-6h-miRNA.pdf]

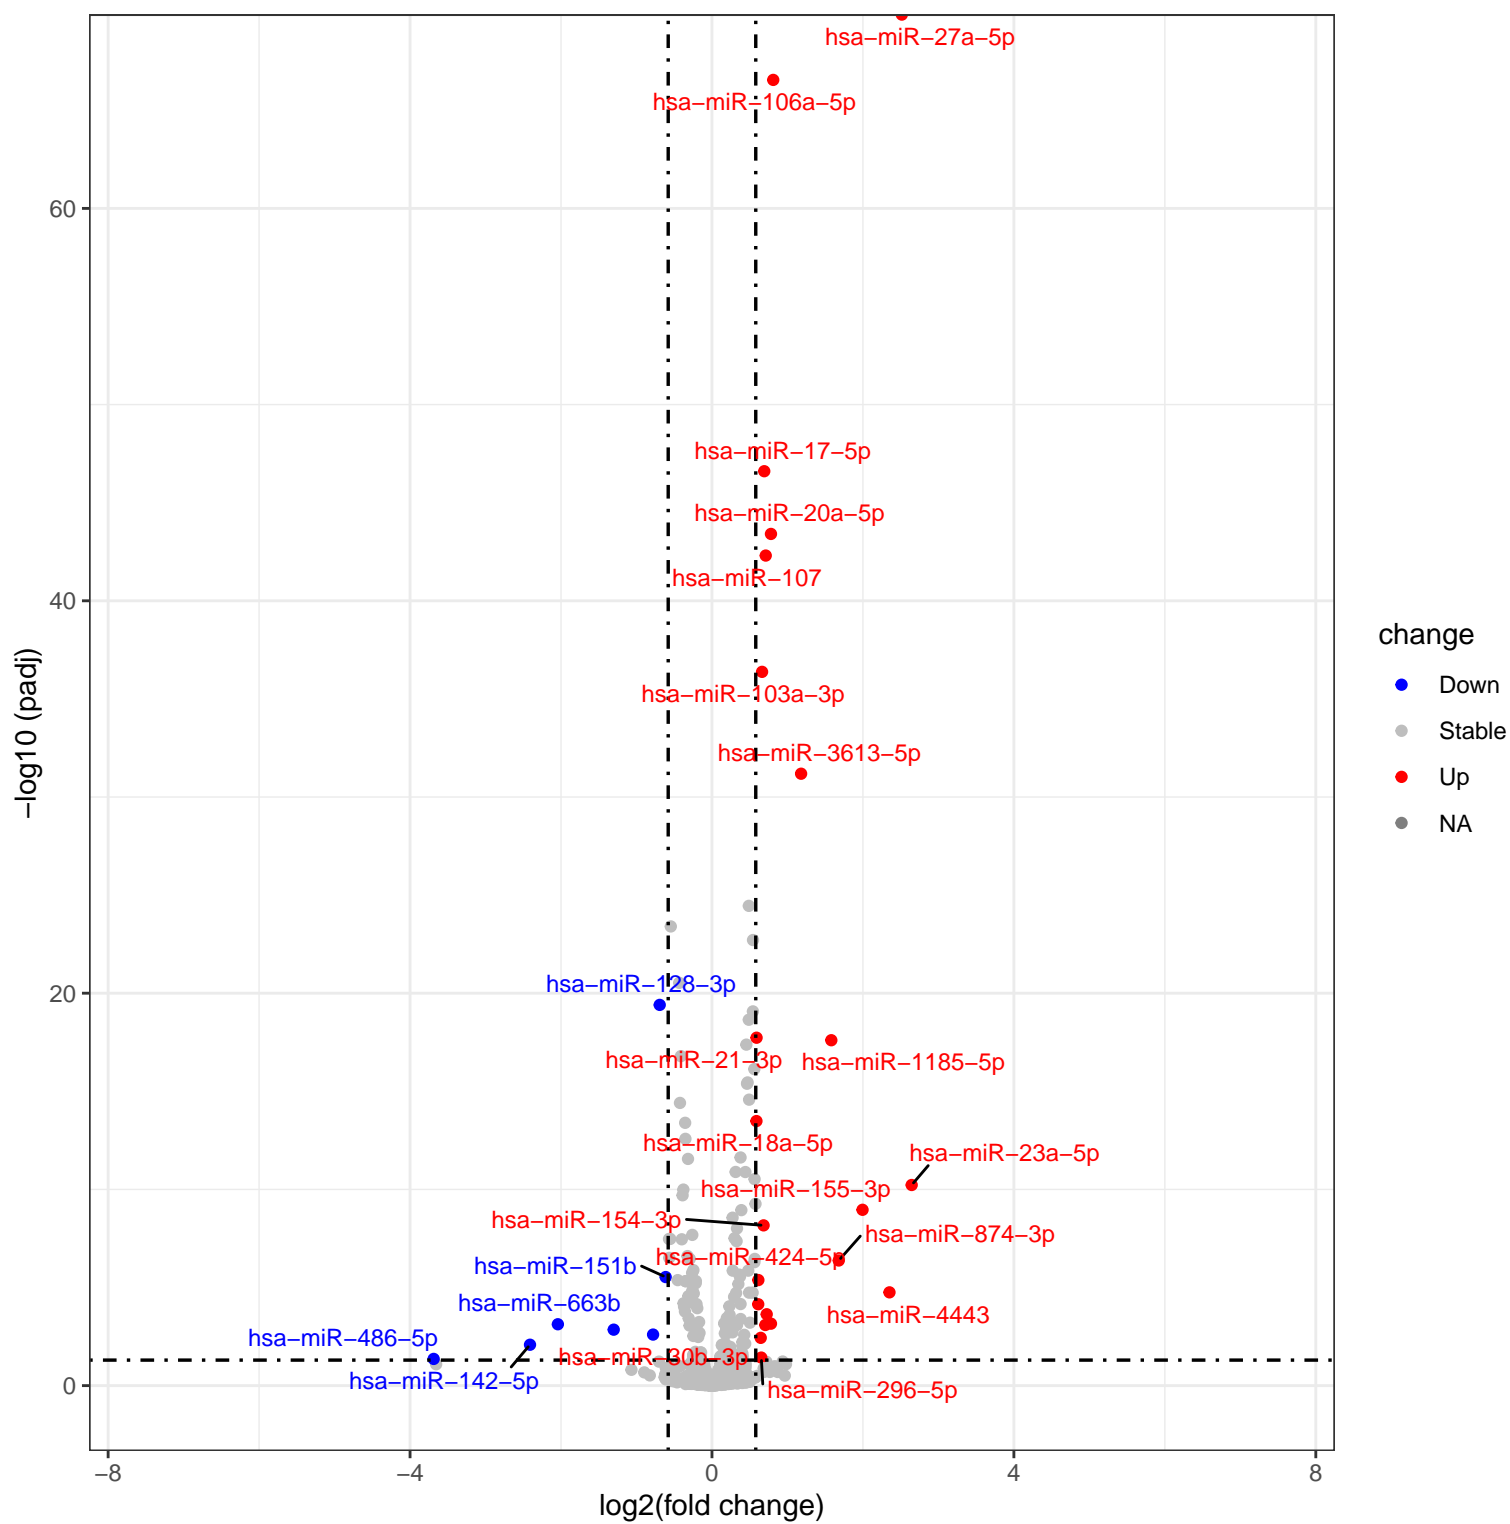

Supplement: Data_Sheet_1.zip [file SARS-Cov-2 vs Control-12h-volcano.pdf › Data Sheet 1/SARS-CoV-2 source code & data/SARS-CoV-2 source code/fig2/2B/output/SARS-Cov-2 vs Control-12h-volcano.pdf]

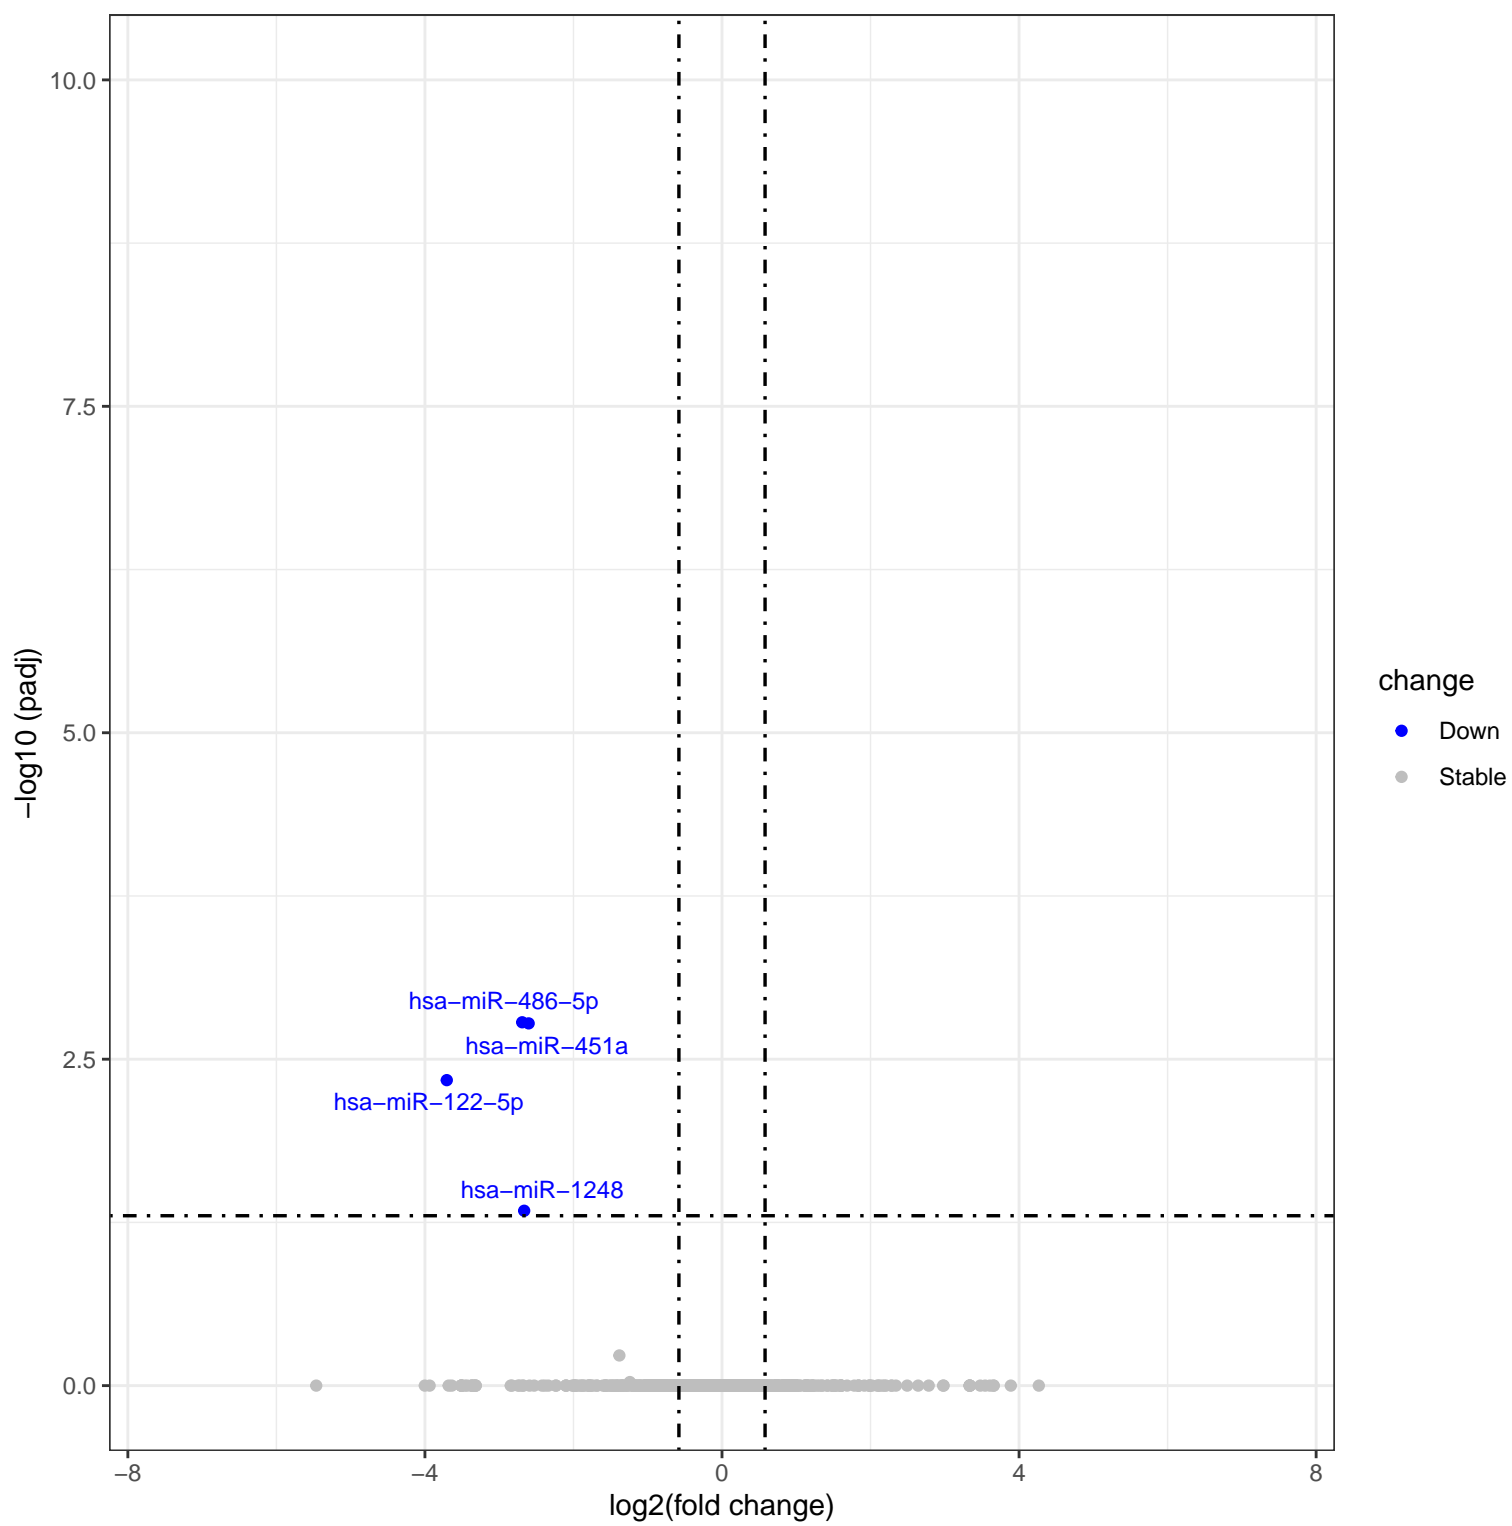

Supplement: Data_Sheet_1.zip [file SARS-Cov-2 vs Control-6h-volcano.pdf › Data Sheet 1/SARS-CoV-2 source code & data/SARS-CoV-2 source code/fig2/2B/output/SARS-Cov-2 vs Control-6h-volcano.pdf]

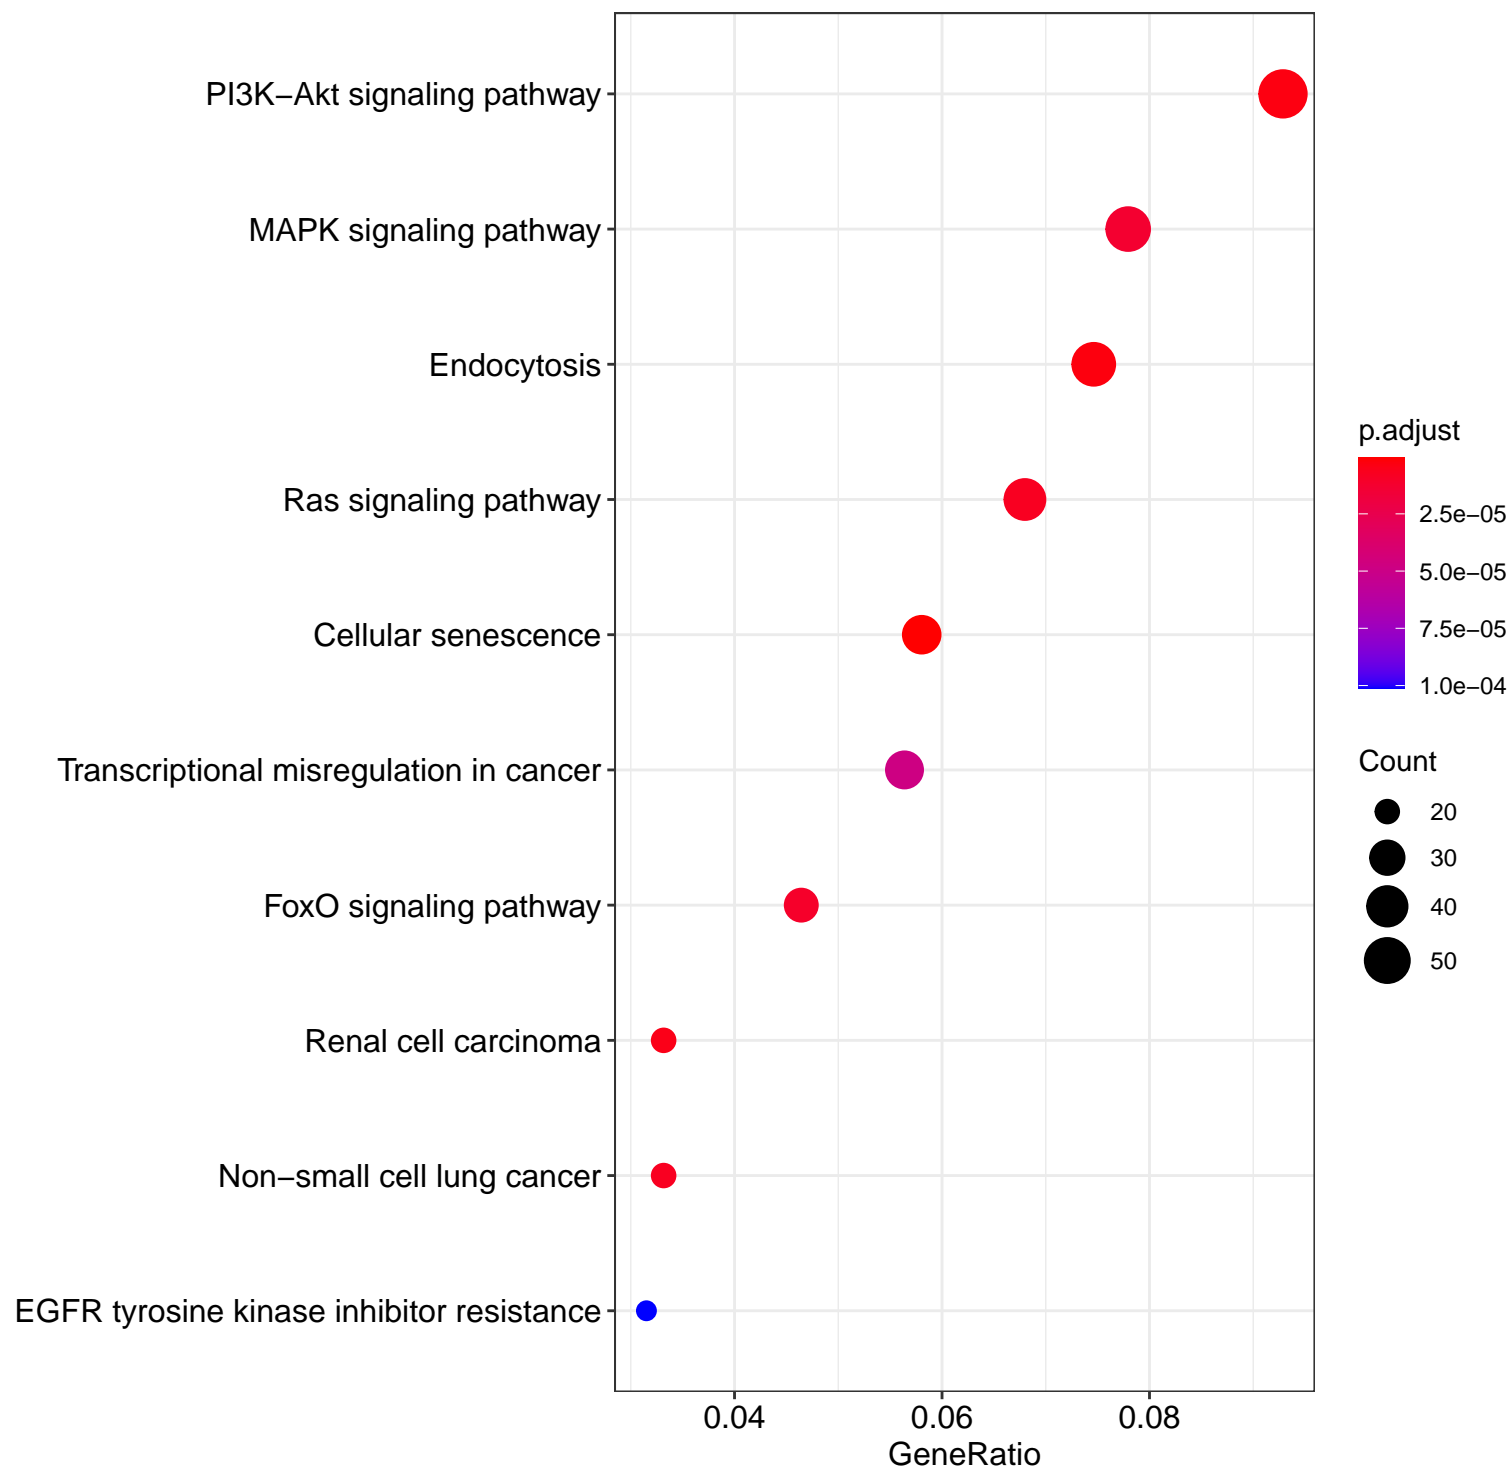

Supplement: Data_Sheet_1.zip [file KEGG.pdf › Data Sheet 1/SARS-CoV-2 source code & data/SARS-CoV-2 source code/fig3/output/KEGG.pdf]

# GO\_MF Terms

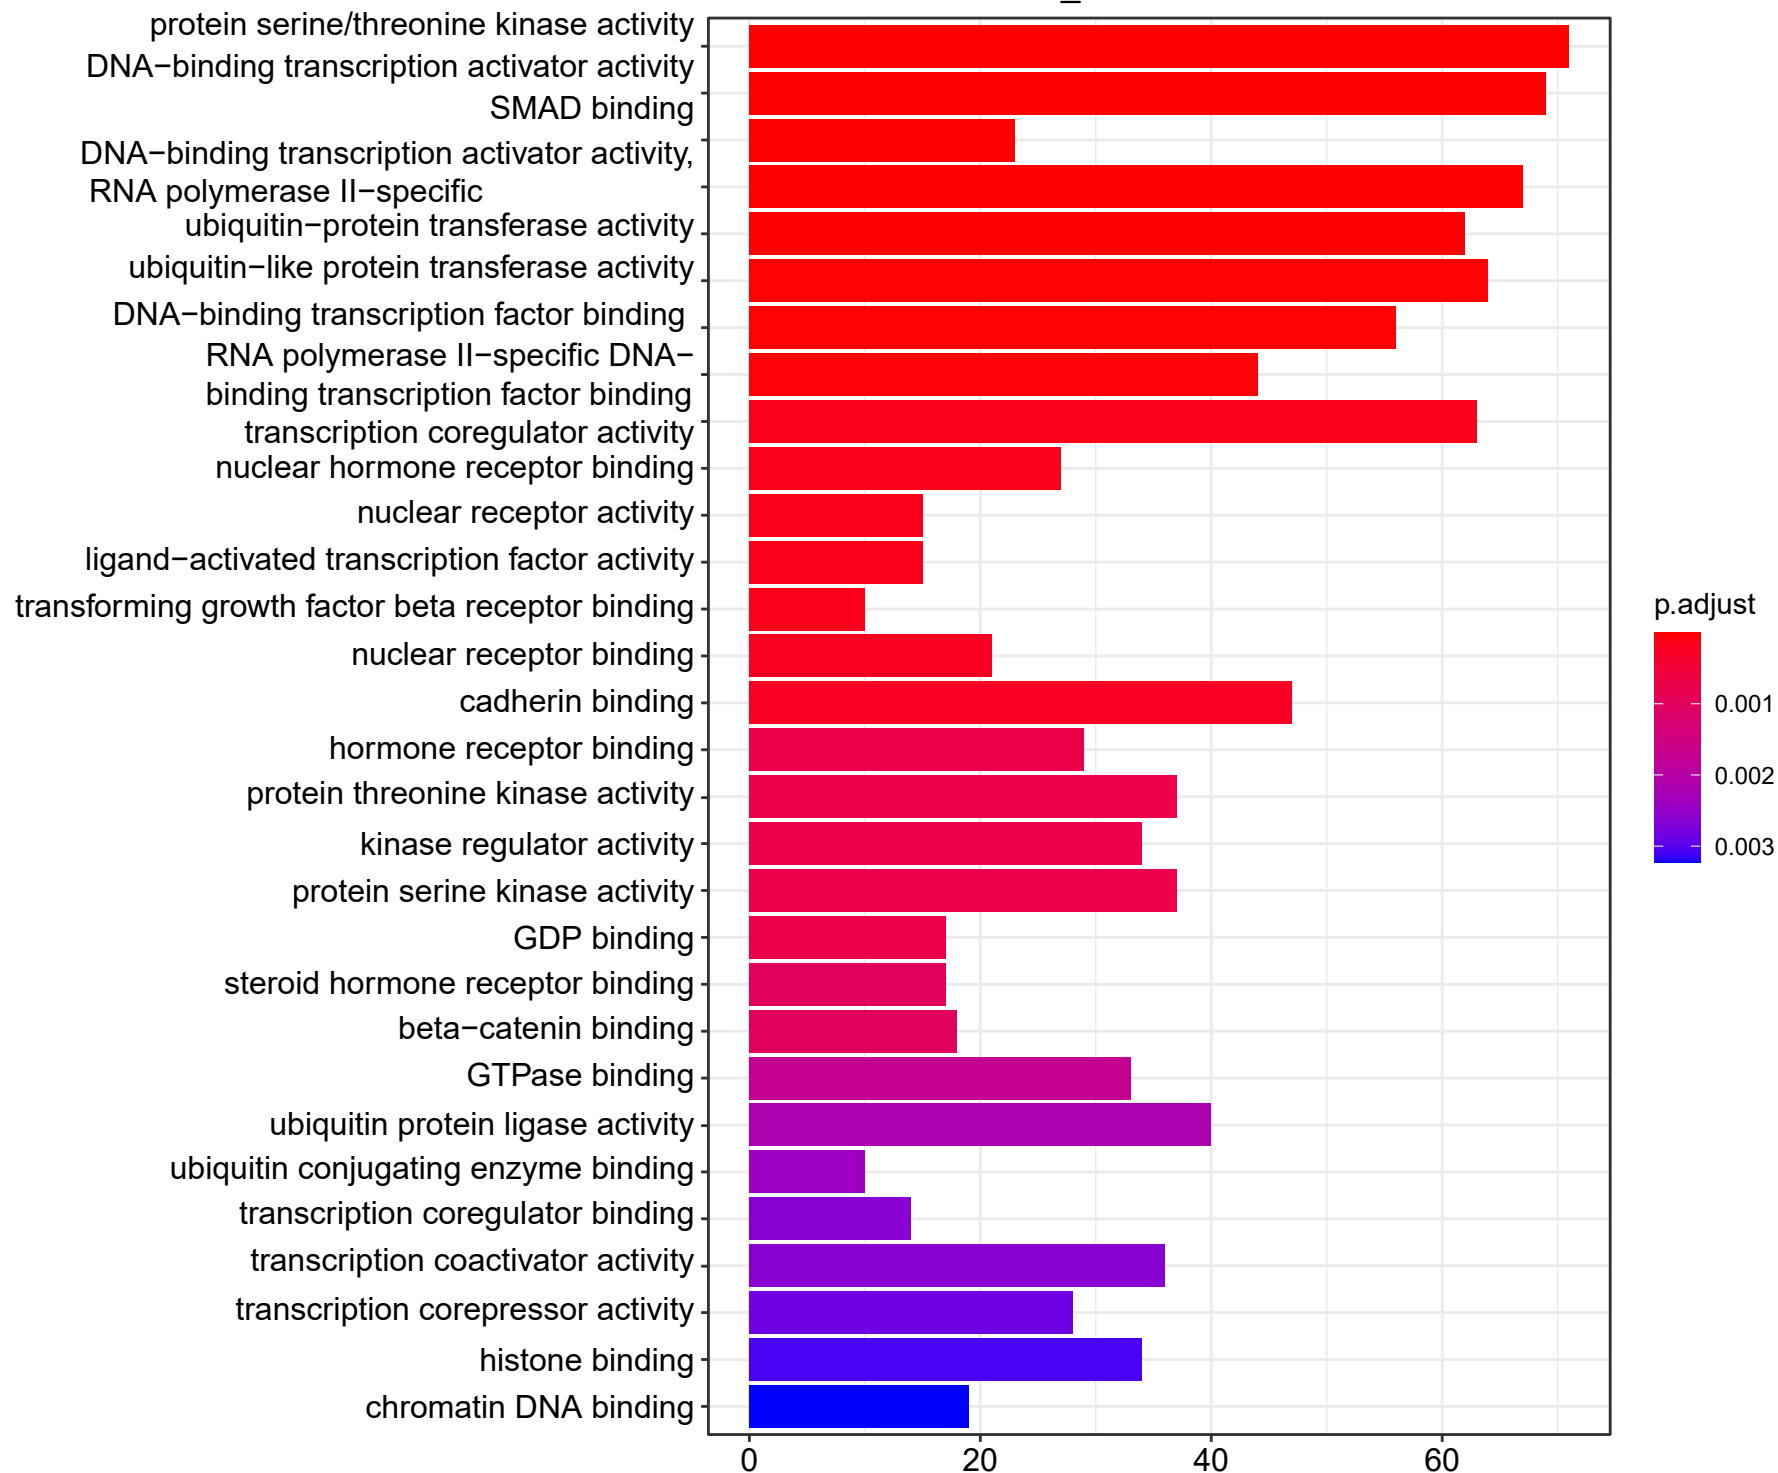

Supplement: Data_Sheet_1.zip [file MF.pdf › Data Sheet 1/SARS-CoV-2 source code & data/SARS-CoV-2 source code/fig3/output/MF.pdf]

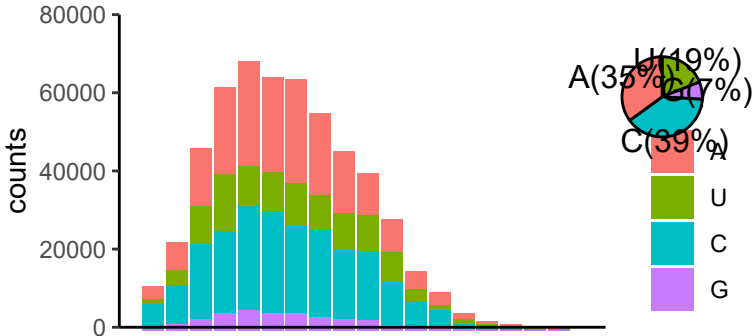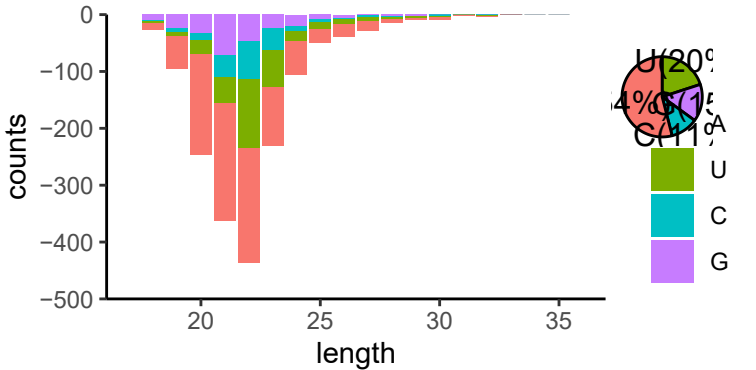

Supplement: Data_Sheet_1.zip [file Vero_SARS-Cov-2-12h-1.pdf › Data Sheet 1/SARS-CoV-2 source code & data/SARS-CoV-2 source code/fig4/output/Vero_SARS-Cov-2-12h-1.pdf]

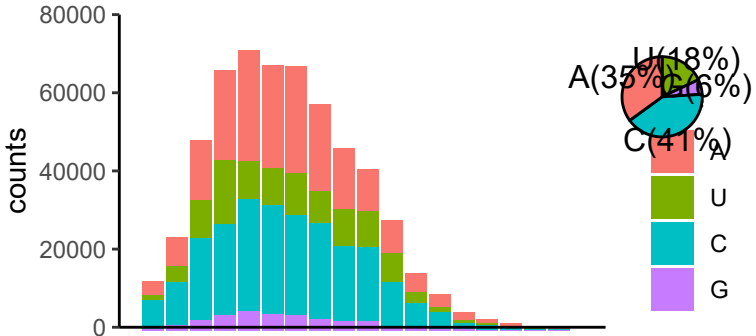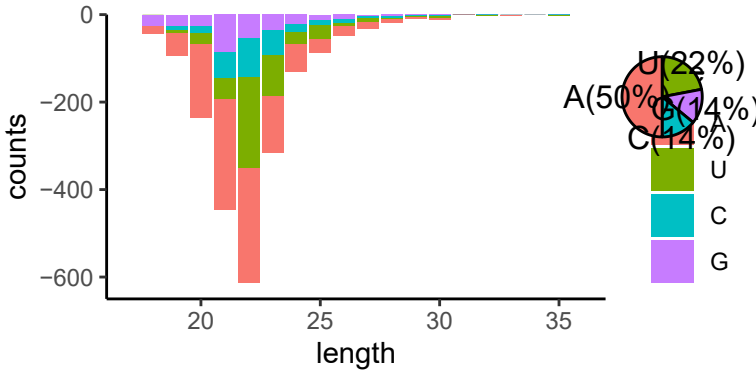

Supplement: Data_Sheet_1.zip [file Vero_SARS-Cov-2-12h-2.pdf › Data Sheet 1/SARS-CoV-2 source code & data/SARS-CoV-2 source code/fig4/output/Vero_SARS-Cov-2-12h-2.pdf]

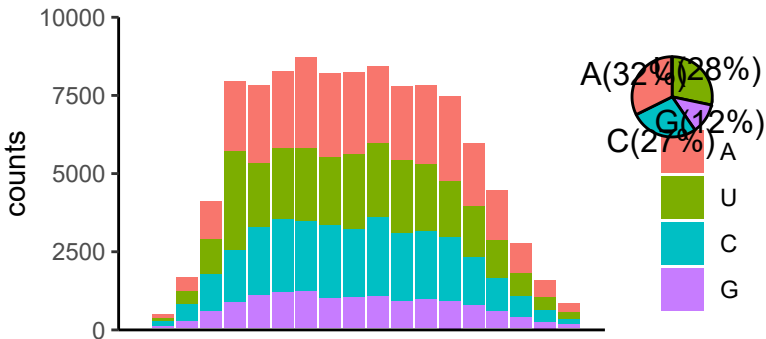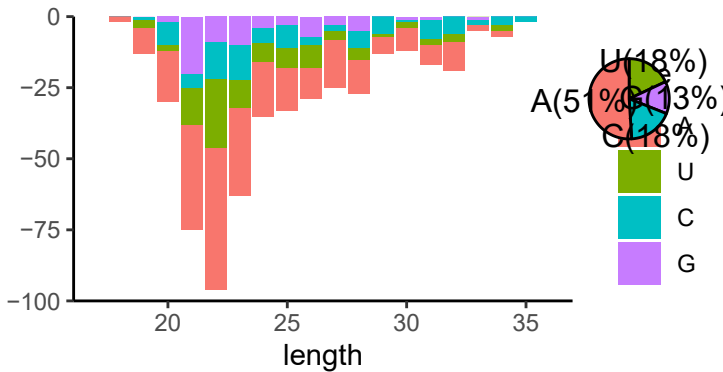

Supplement: Data_Sheet_1.zip [file Vero_SARS-Cov-2-6h-1.pdf › Data Sheet 1/SARS-CoV-2 source code & data/SARS-CoV-2 source code/fig4/output/Vero_SARS-Cov-2-6h-1.pdf]

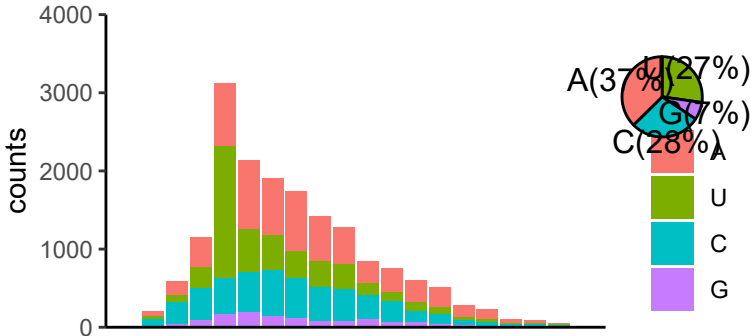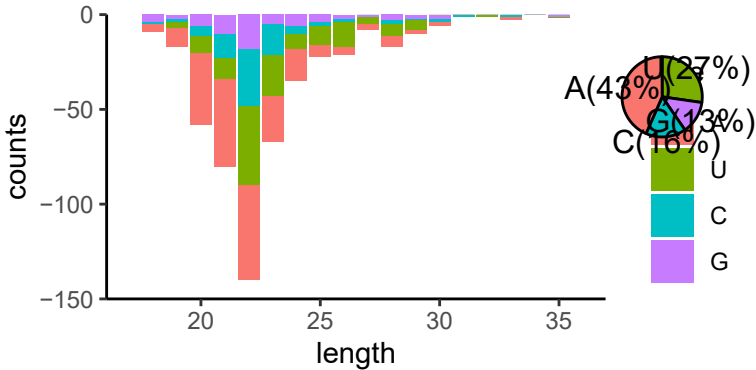

Supplement: Data_Sheet_1.zip [file Vero_SARS-Cov-2-6h-2.pdf › Data Sheet 1/SARS-CoV-2 source code & data/SARS-CoV-2 source code/fig4/output/Vero_SARS-Cov-2-6h-2.pdf]

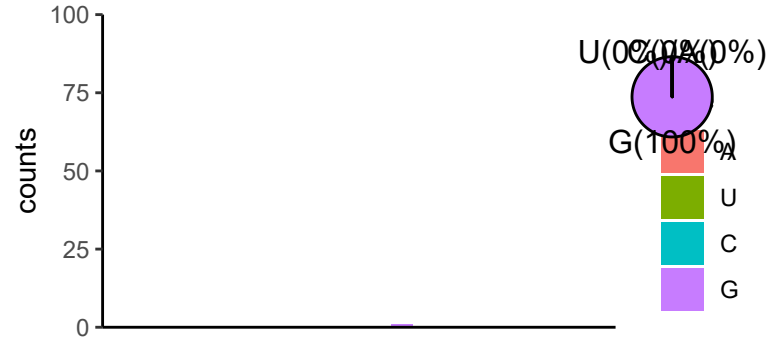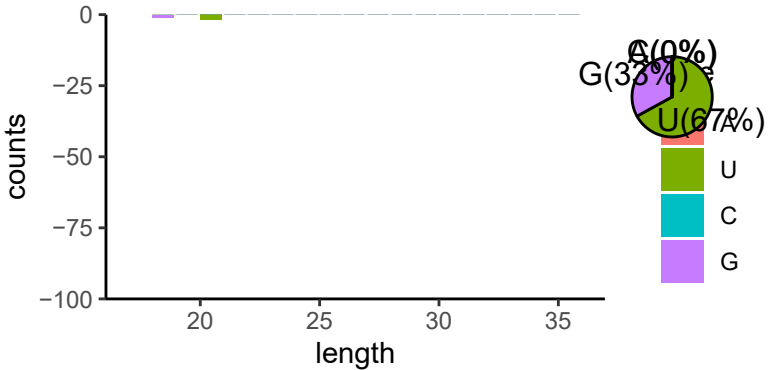

Supplement: Data_Sheet_1.zip [file Vero_control-12h-1.pdf › Data Sheet 1/SARS-CoV-2 source code & data/SARS-CoV-2 source code/fig4/output/Vero_control-12h-1.pdf]

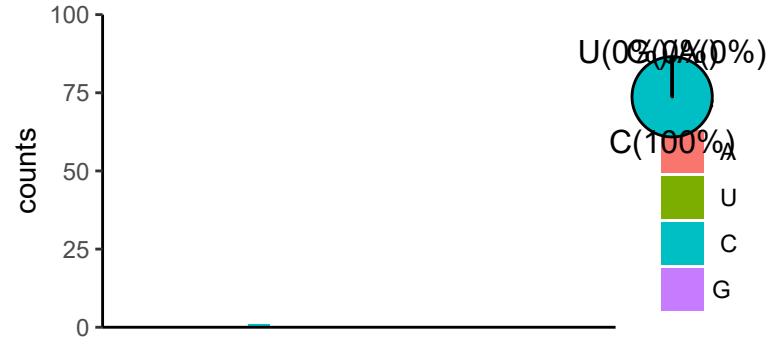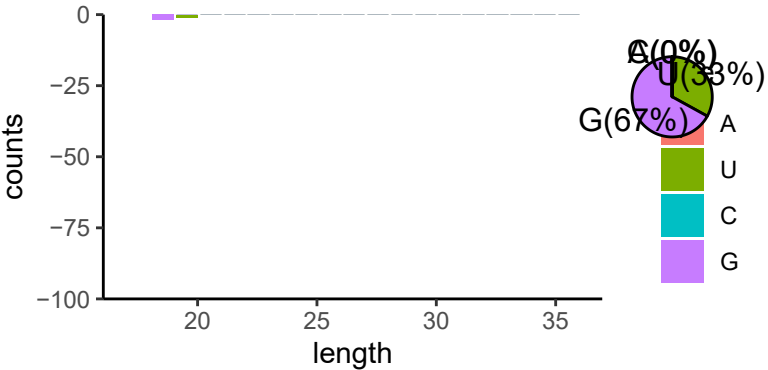

Supplement: Data_Sheet_1.zip [file Vero_control-12h-2.pdf › Data Sheet 1/SARS-CoV-2 source code & data/SARS-CoV-2 source code/fig4/output/Vero_control-12h-2.pdf]

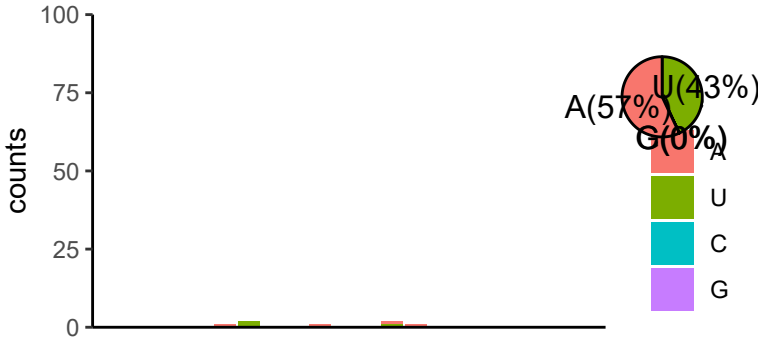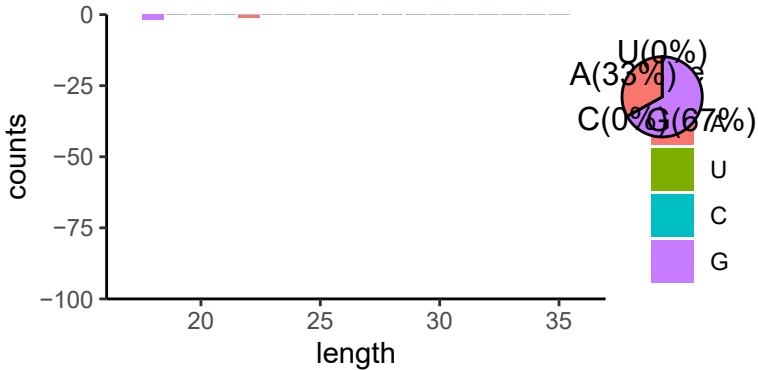

Supplement: Data_Sheet_1.zip [file Vero_control-6h-1.pdf › Data Sheet 1/SARS-CoV-2 source code & data/SARS-CoV-2 source code/fig4/output/Vero_control-6h-1.pdf]

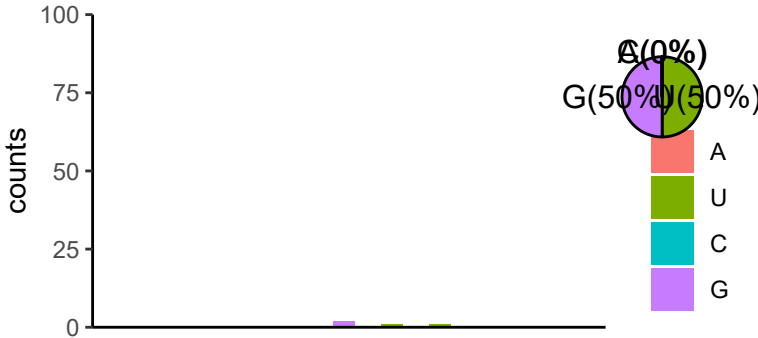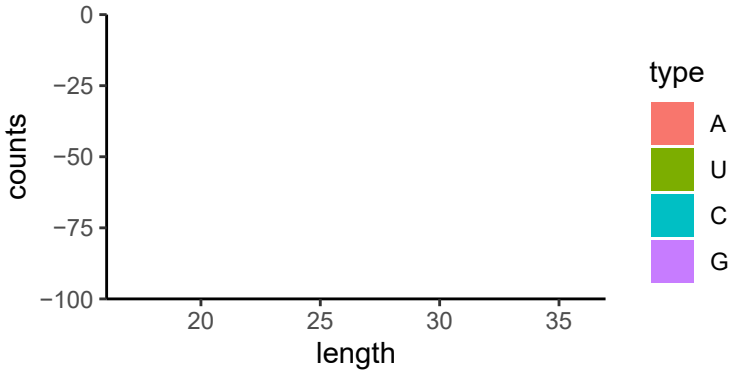

Supplement: Data_Sheet_1.zip [file Vero_control-6h-2.pdf › Data Sheet 1/SARS-CoV-2 source code & data/SARS-CoV-2 source code/fig4/output/Vero_control-6h-2.pdf]

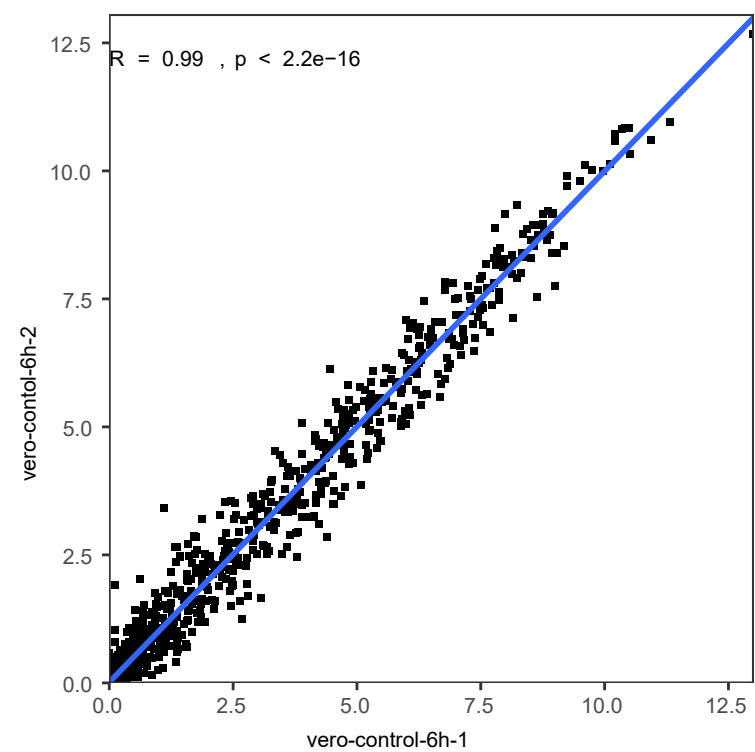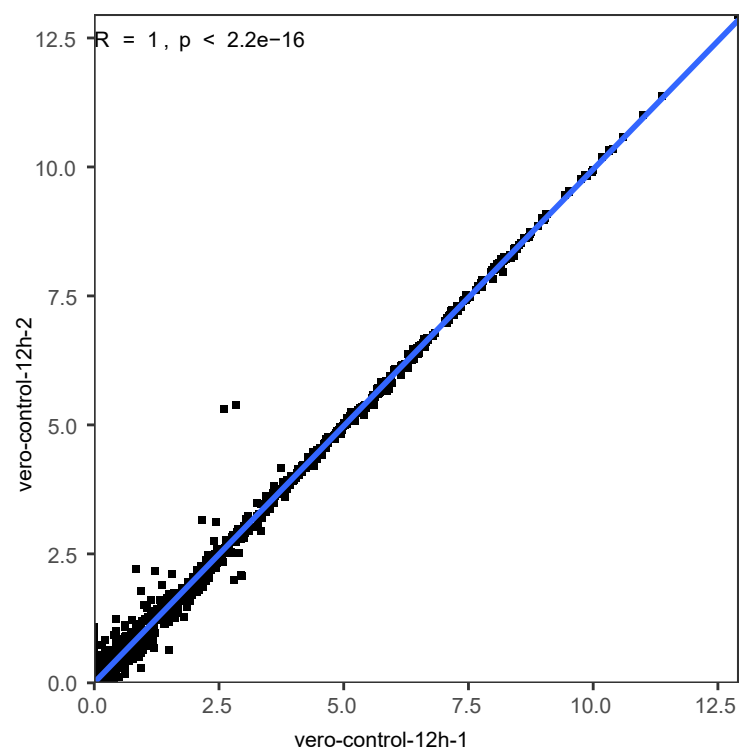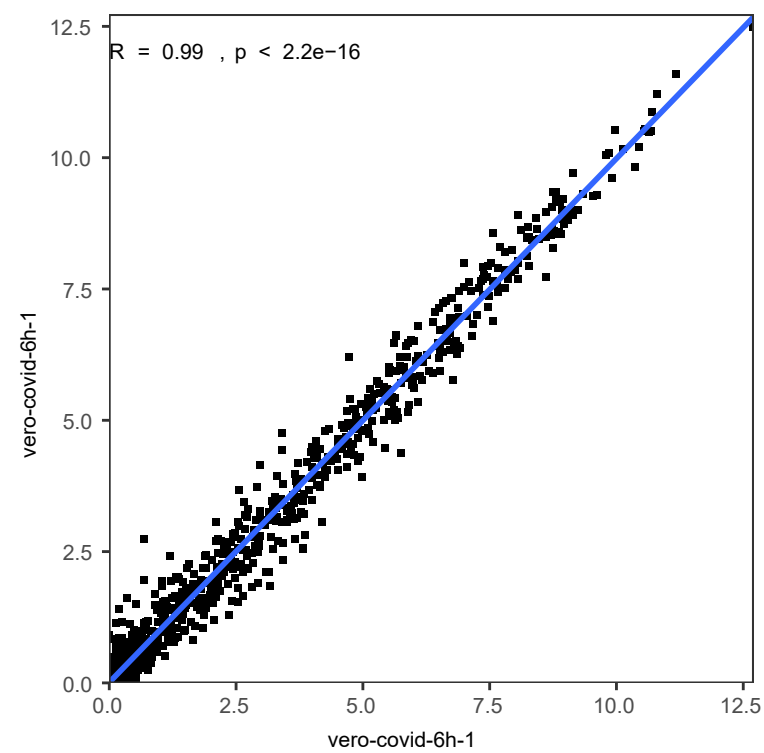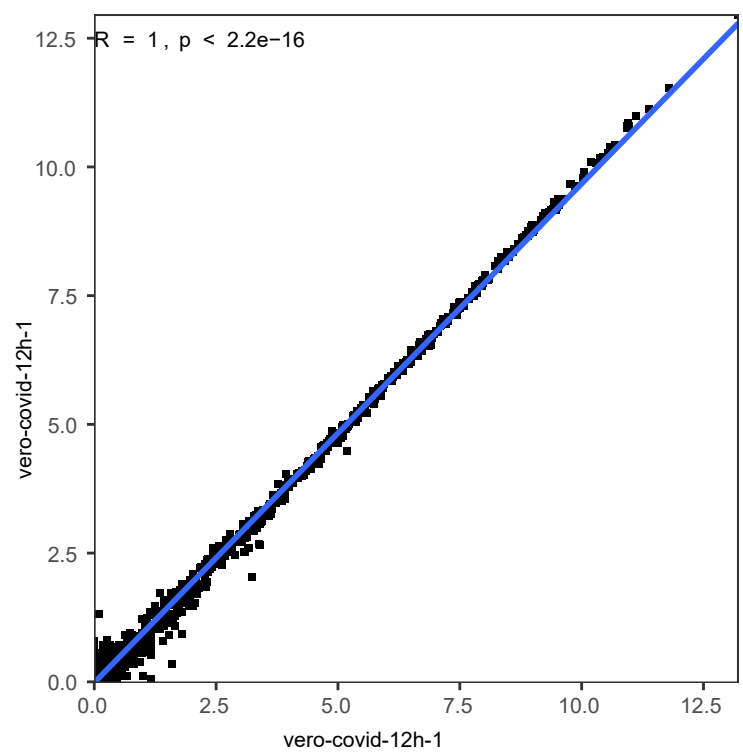

Supplement: Data_Sheet_1.zip [file corelation.pdf › Data Sheet 1/SARS-CoV-2 source code & data/SARS-CoV-2 source code/figs1/output/corelation.pdf]

# DESeq2 PCA

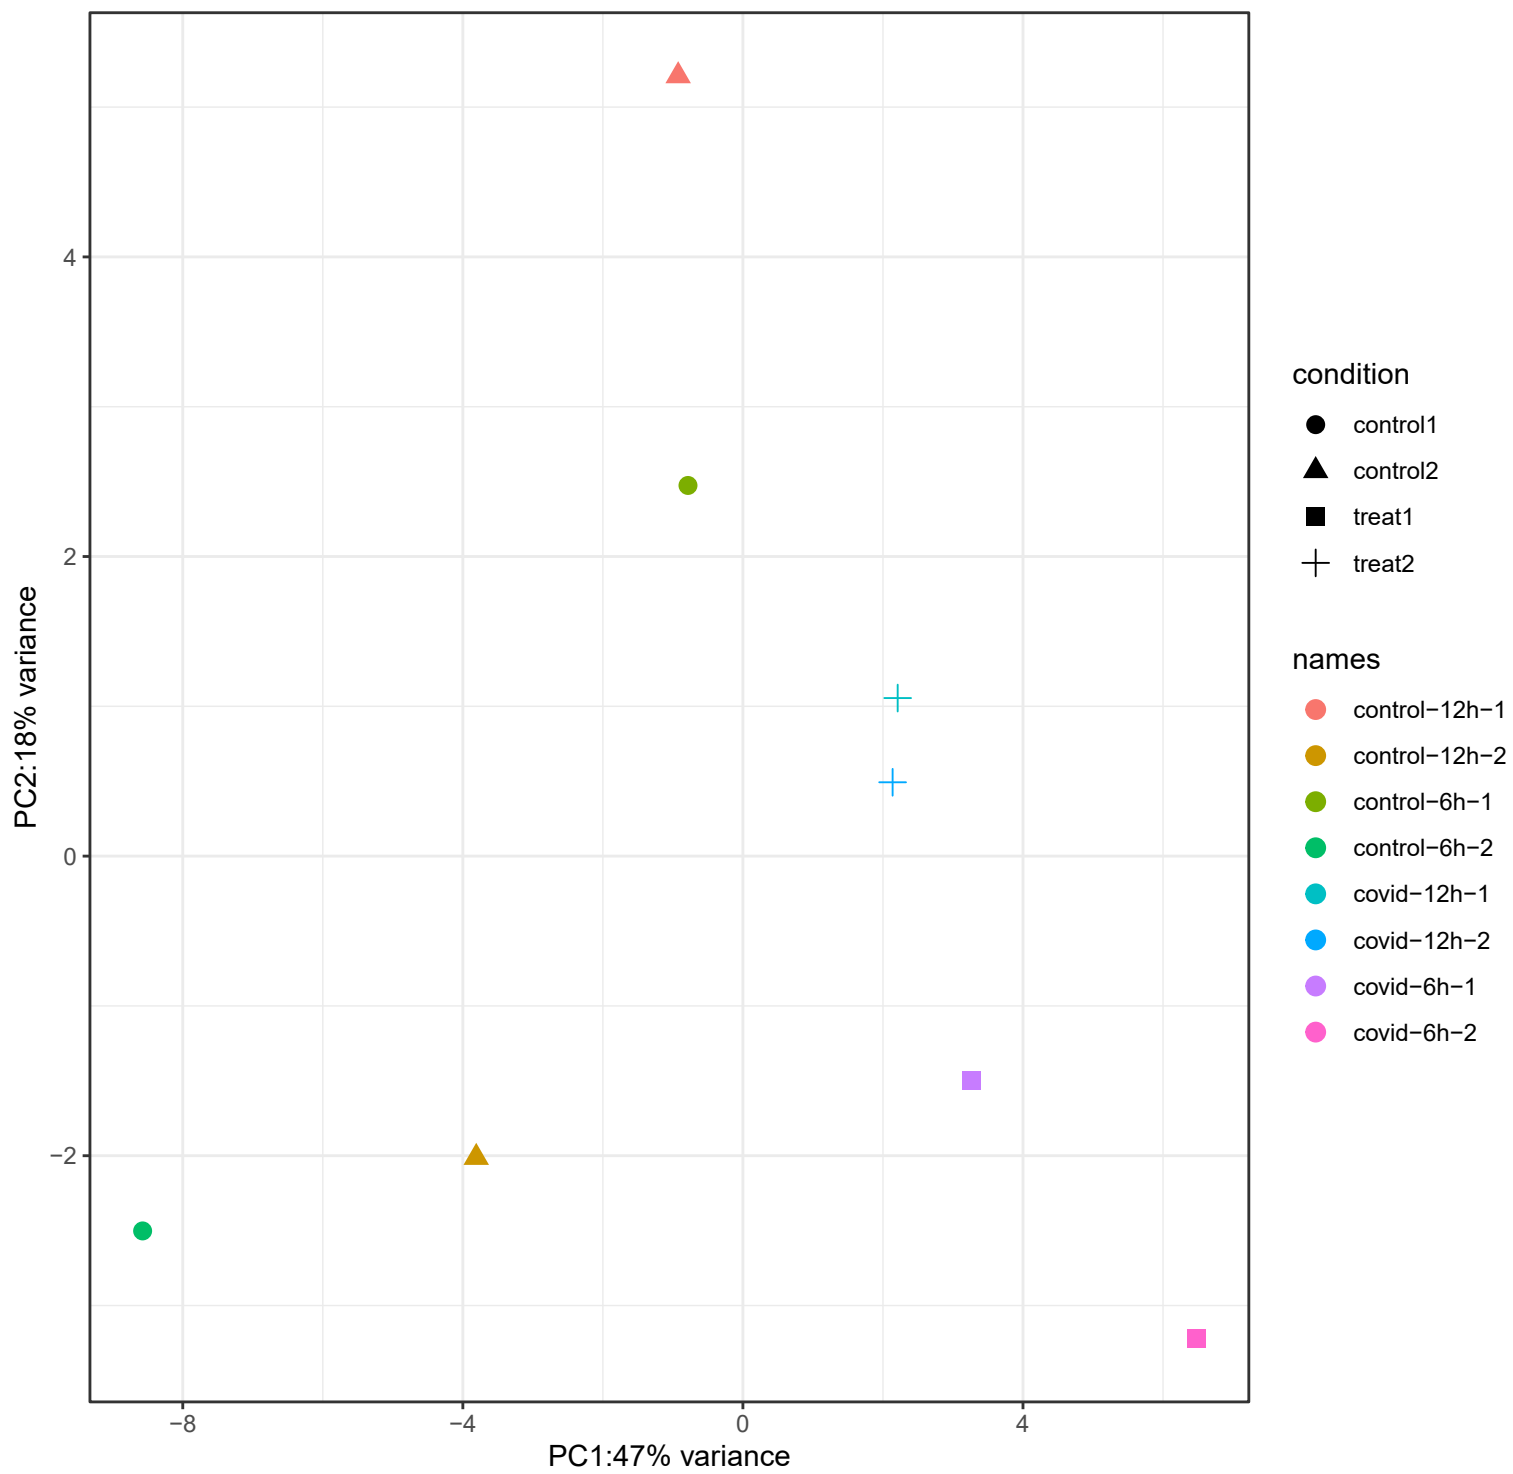

Supplement: Data_Sheet_1.zip [file pca.pdf › Data Sheet 1/SARS-CoV-2 source code & data/SARS-CoV-2 source code/figs1/output/pca.pdf]

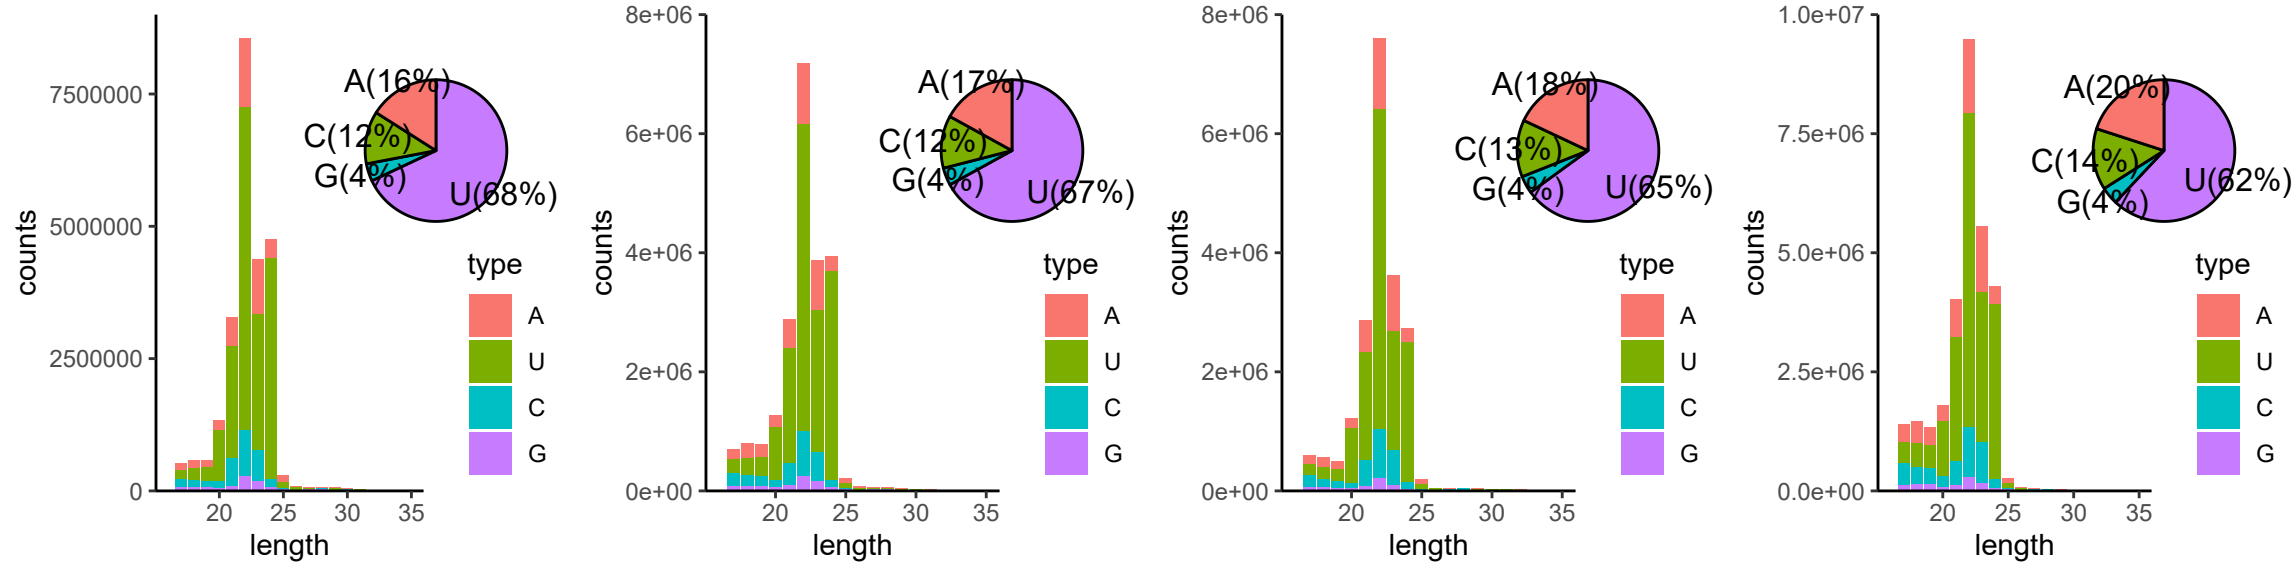

Supplement: Data_Sheet_1.zip [file Figure S2A.pdf › Data Sheet 1/SARS-CoV-2 source code & data/SARS-CoV-2 source code/figs2/output/Figure S2A.pdf]

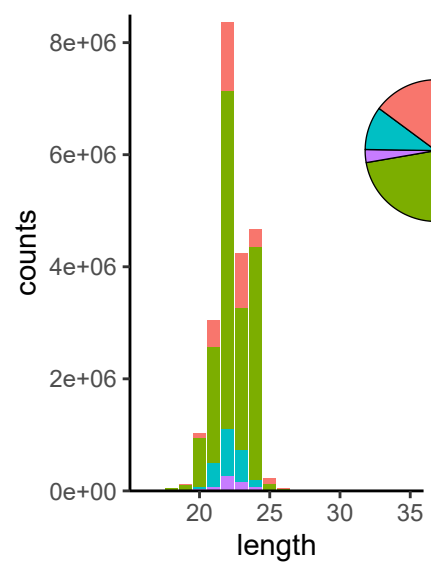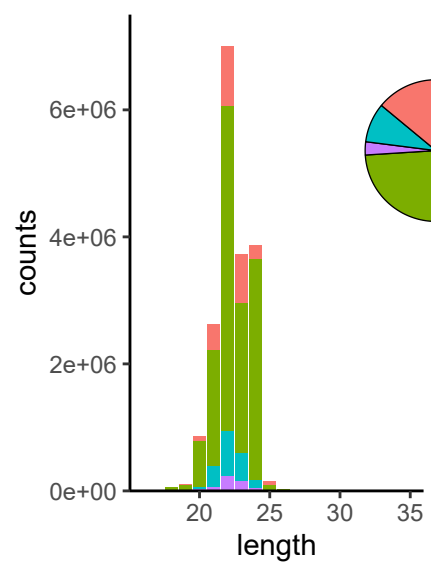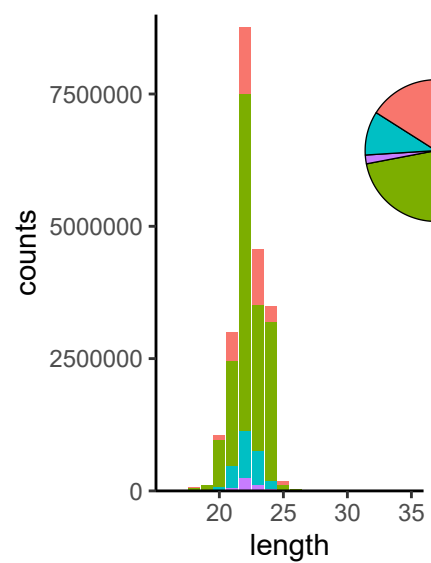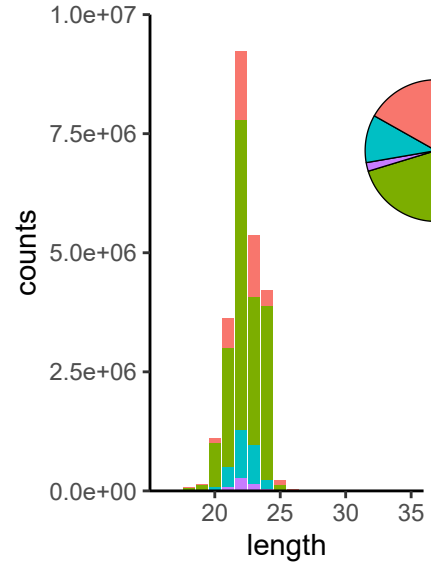

Supplement: Data_Sheet_1.zip [file Figure S2B.pdf › Data Sheet 1/SARS-CoV-2 source code & data/SARS-CoV-2 source code/figs2/output/Figure S2B.pdf]

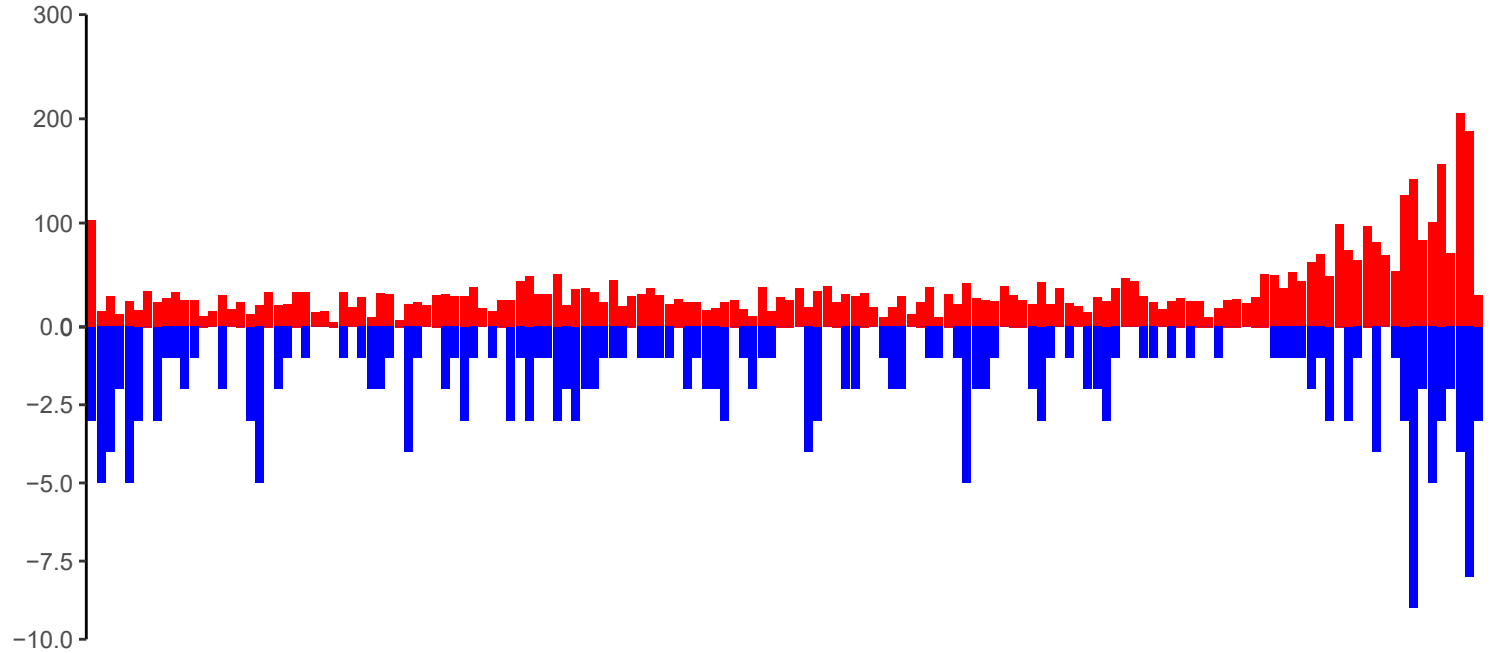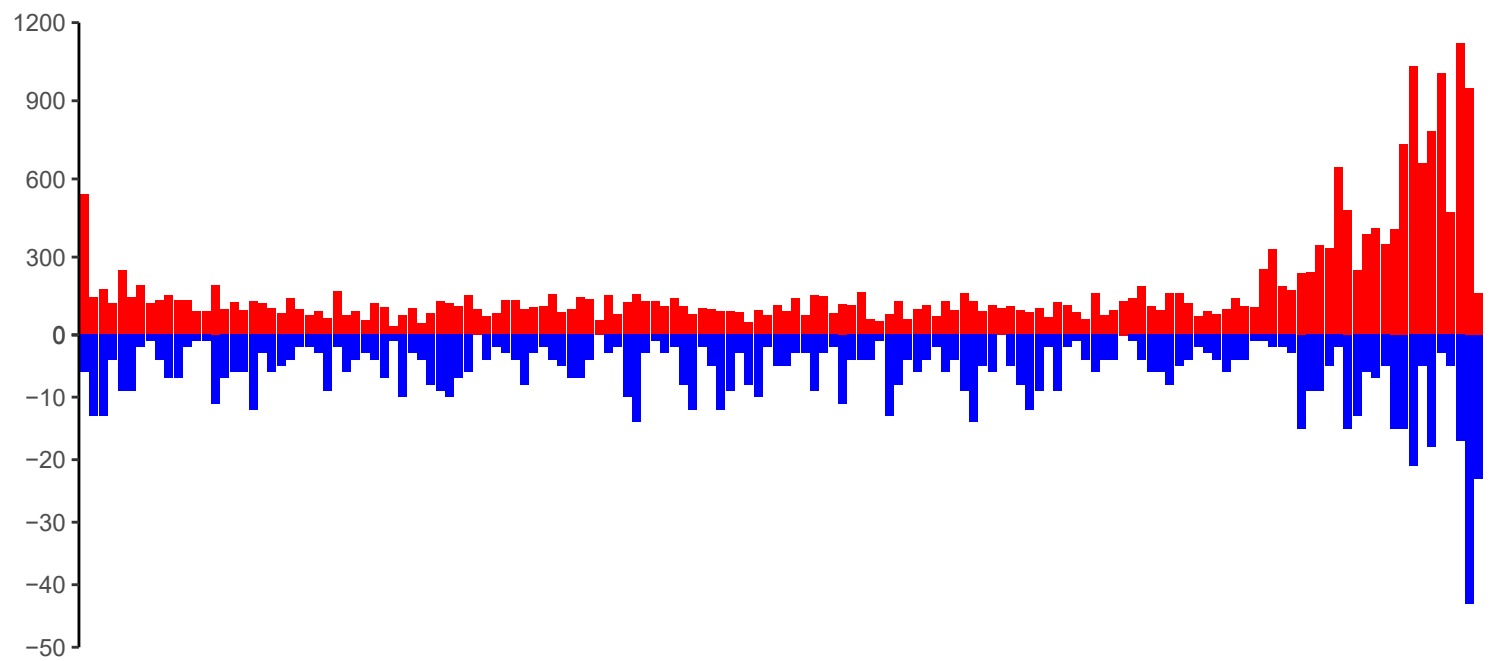

Supplement: Data_Sheet_1.zip [file 22nt.pdf › Data Sheet 1/SARS-CoV-2 source code & data/SARS-CoV-2 source code/figs3/output/22nt.pdf]

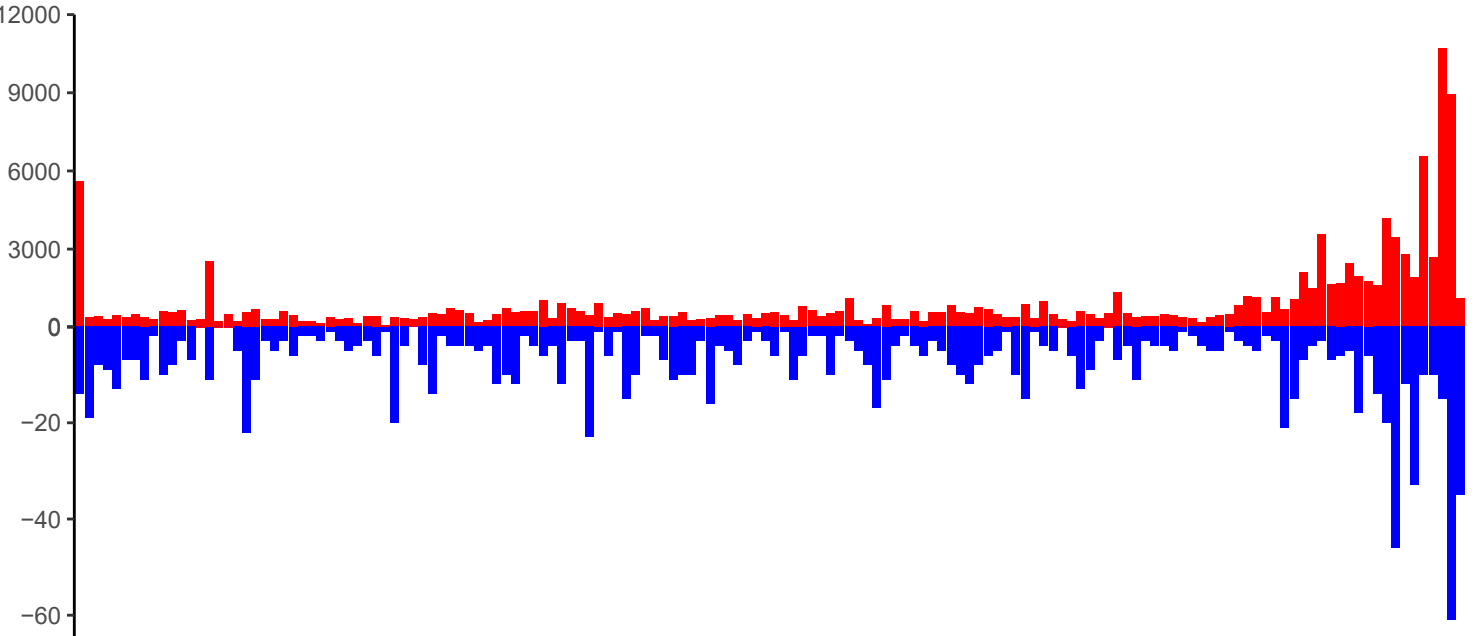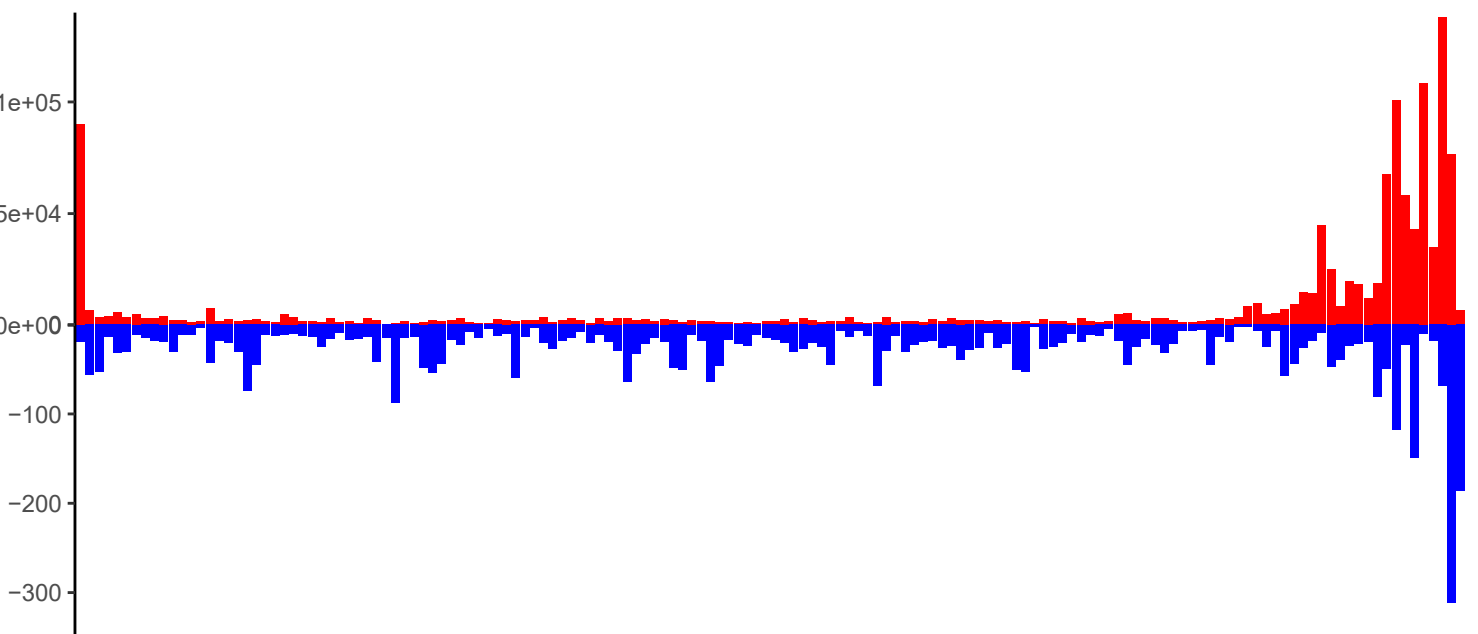

Supplement: Data_Sheet_1.zip [file vsi.pdf › Data Sheet 1/SARS-CoV-2 source code & data/SARS-CoV-2 source code/figs3/output/vsi.pdf]

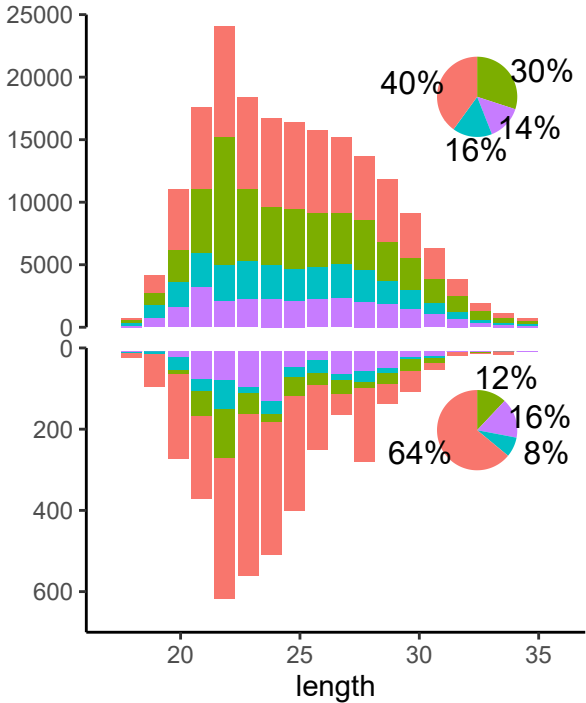

Supplement: Data_Sheet_1.zip [file Figure S4A-A549-hACE2-SARS-CoV-2-24h.pdf › Data Sheet 1/SARS-CoV-2 source code & data/SARS-CoV-2 source code/figs4/output/Figure S4A-A549-hACE2-SARS-CoV-2-24h.pdf]

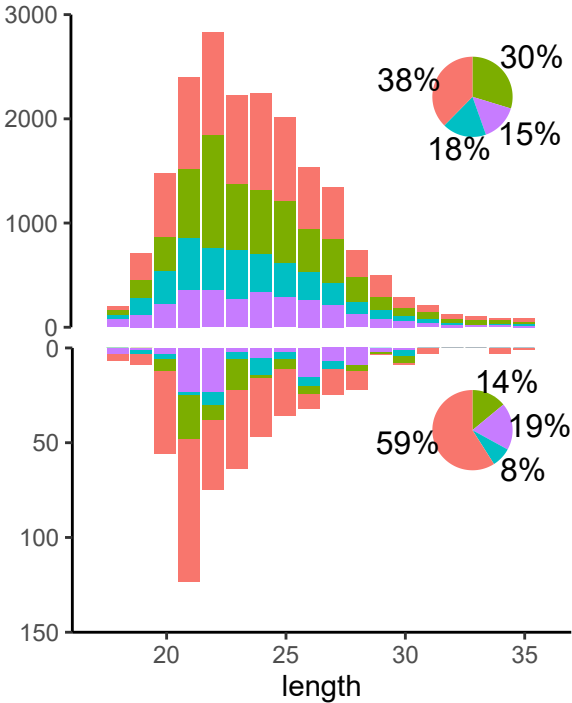

Supplement: Data_Sheet_1.zip [file Figure S4A-A549-hACE2-SARS-CoV-2-48h.pdf › Data Sheet 1/SARS-CoV-2 source code & data/SARS-CoV-2 source code/figs4/output/Figure S4A-A549-hACE2-SARS-CoV-2-48h.pdf]

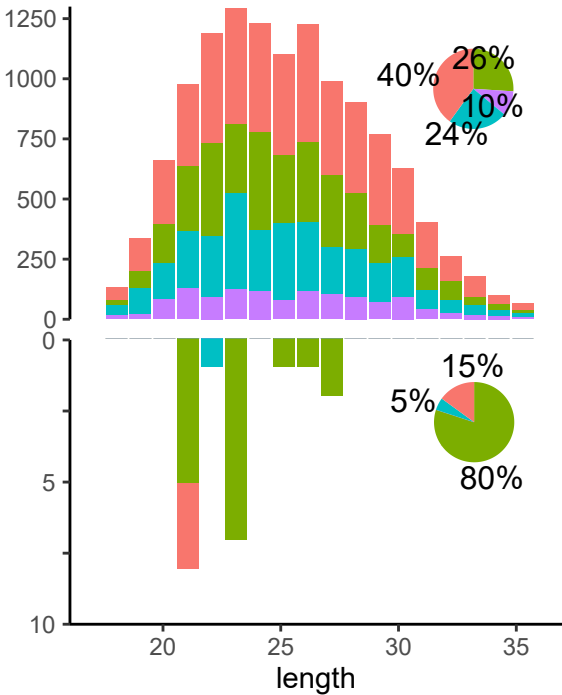

Supplement: Data_Sheet_1.zip [file Figure S4A-A549-hACE2-SARS-CoV-2-6h.pdf › Data Sheet 1/SARS-CoV-2 source code & data/SARS-CoV-2 source code/figs4/output/Figure S4A-A549-hACE2-SARS-CoV-2-6h.pdf]

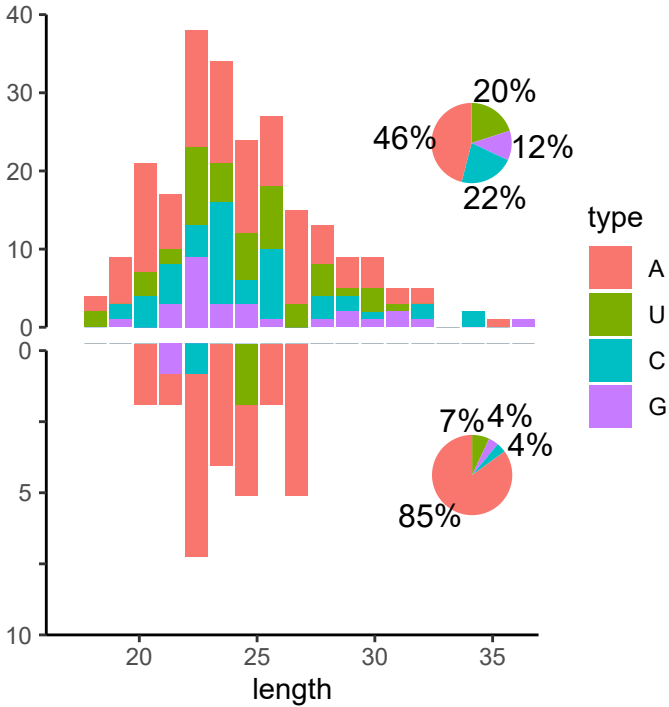

Supplement: Data_Sheet_1.zip [file Figure S4A-Calu-3-SARS-CoV-2-6h.pdf › Data Sheet 1/SARS-CoV-2 source code & data/SARS-CoV-2 source code/figs4/output/Figure S4A-Calu-3-SARS-CoV-2-6h.pdf]

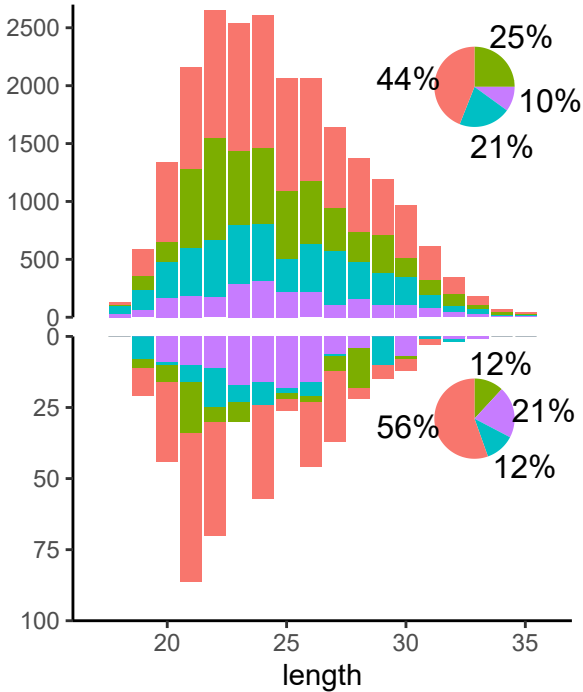

Supplement: Data_Sheet_1.zip [file Figure S4A-PC-9-SARS-CoV-2-24h.pdf › Data Sheet 1/SARS-CoV-2 source code & data/SARS-CoV-2 source code/figs4/output/Figure S4A-PC-9-SARS-CoV-2-24h.pdf]

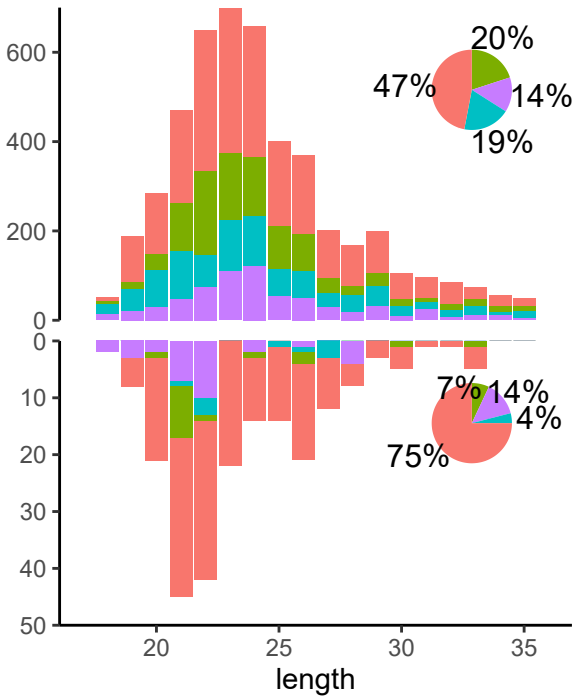

Supplement: Data_Sheet_1.zip [file Figure S4A-PC-9-SARS-CoV-2-48h.pdf › Data Sheet 1/SARS-CoV-2 source code & data/SARS-CoV-2 source code/figs4/output/Figure S4A-PC-9-SARS-CoV-2-48h.pdf]

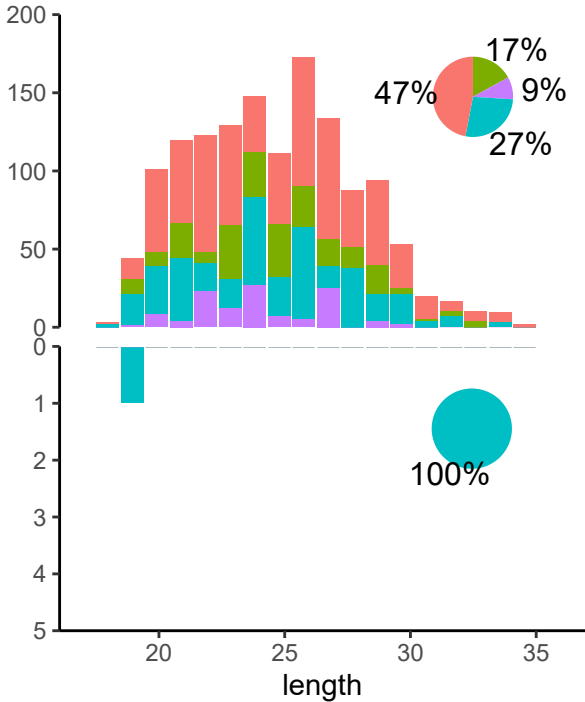

Supplement: Data_Sheet_1.zip [file Figure S4A-PC-9-SARS-CoV-2-6h.pdf › Data Sheet 1/SARS-CoV-2 source code & data/SARS-CoV-2 source code/figs4/output/Figure S4A-PC-9-SARS-CoV-2-6h.pdf]

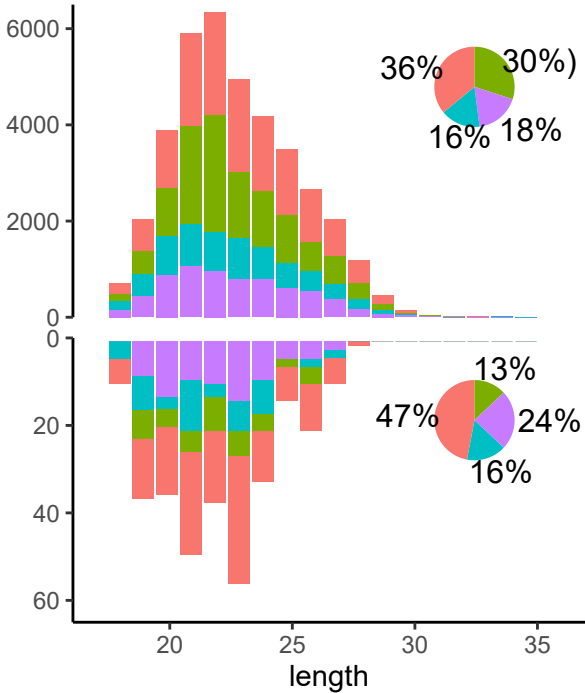

Supplement: Data_Sheet_1.zip [file Figure S4B-A549-hACE2-SARS-CoV-2-24h.pdf › Data Sheet 1/SARS-CoV-2 source code & data/SARS-CoV-2 source code/figs4/output/Figure S4B-A549-hACE2-SARS-CoV-2-24h.pdf]

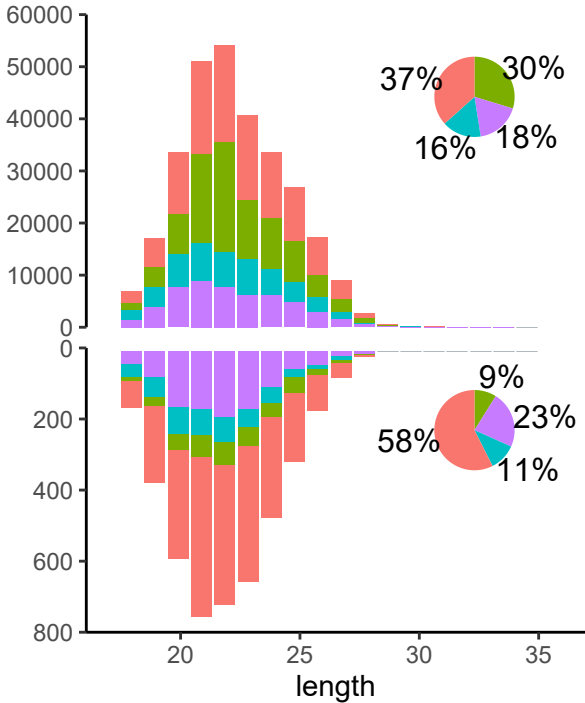

Supplement: Data_Sheet_1.zip [file Figure S4B-A549-hACE2-SARS-CoV-2-48h.pdf › Data Sheet 1/SARS-CoV-2 source code & data/SARS-CoV-2 source code/figs4/output/Figure S4B-A549-hACE2-SARS-CoV-2-48h.pdf]

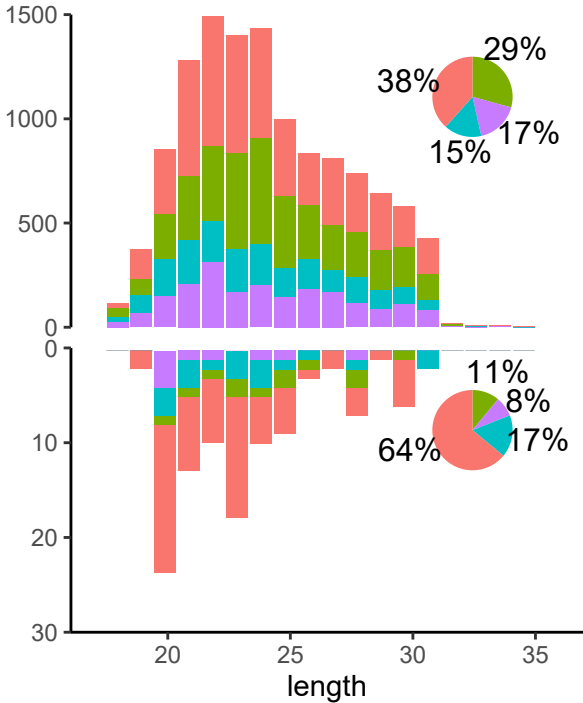

Supplement: Data_Sheet_1.zip [file Figure S4B-Calu-3-SARS-CoV-2.pdf › Data Sheet 1/SARS-CoV-2 source code & data/SARS-CoV-2 source code/figs4/output/Figure S4B-Calu-3-SARS-CoV-2.pdf]

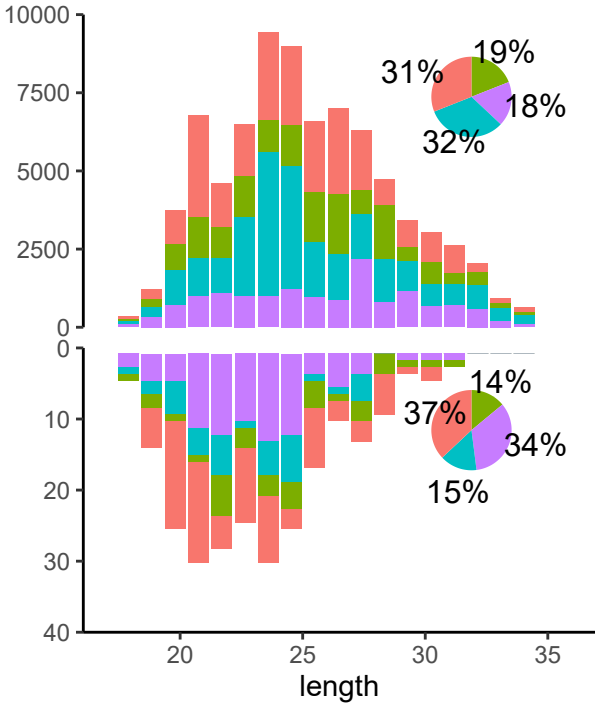

Supplement: Data_Sheet_1.zip [file Figure S4C-Calu-3-12h-SARS-CoV-2.pdf › Data Sheet 1/SARS-CoV-2 source code & data/SARS-CoV-2 source code/figs4/output/Figure S4C-Calu-3-12h-SARS-CoV-2.pdf]

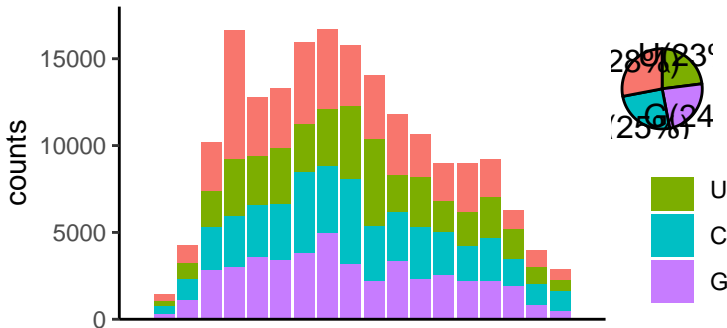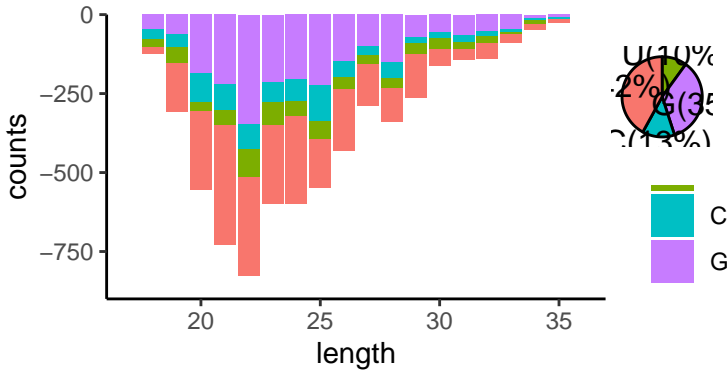

Supplement: Data_Sheet_1.zip [file Figure S4C-Calu-3-24h-SARS-CoV-2.pdf › Data Sheet 1/SARS-CoV-2 source code & data/SARS-CoV-2 source code/figs4/output/Figure S4C-Calu-3-24h-SARS-CoV-2.pdf]

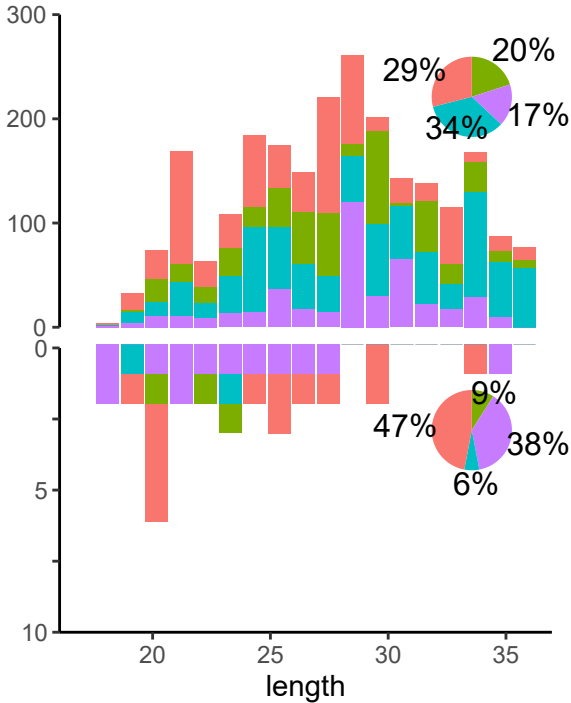

Supplement: Data_Sheet_1.zip [file Figure S4C-Calu-3-4h-SARS-CoV-2.pdf › Data Sheet 1/SARS-CoV-2 source code & data/SARS-CoV-2 source code/figs4/output/Figure S4C-Calu-3-4h-SARS-CoV-2.pdf]

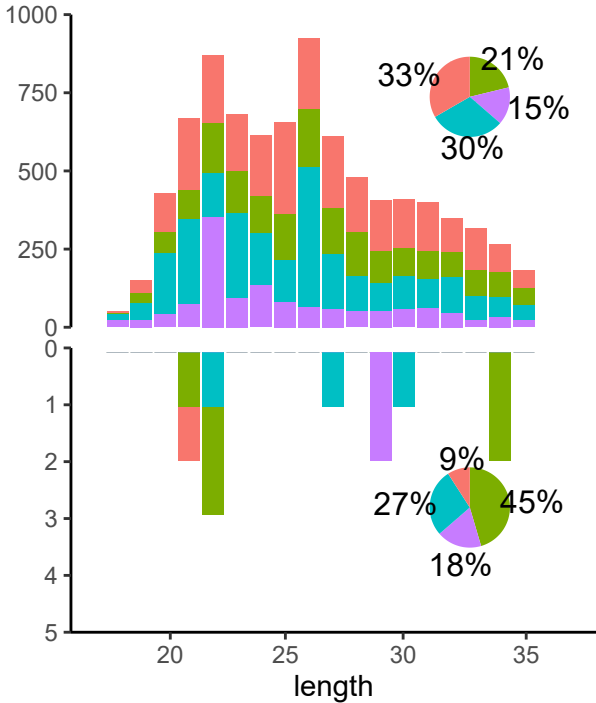

Supplement: Data_Sheet_1.zip [file Figure S4D-Calu-3_MOI10-SARS-CoV-2-24h.pdf › Data Sheet 1/SARS-CoV-2 source code & data/SARS-CoV-2 source code/figs4/output/Figure S4D-Calu-3_MOI10-SARS-CoV-2-24h.pdf]

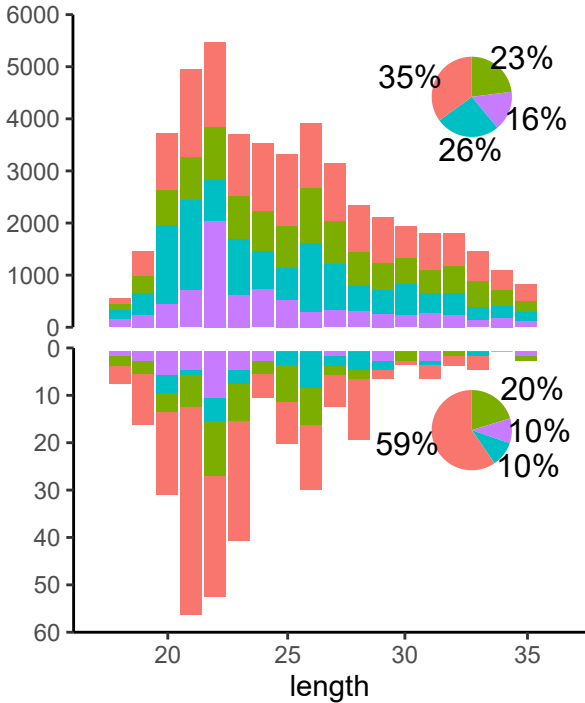

Supplement: Data_Sheet_1.zip [file Figure S4D-Calu-3_MOI10-SARS-CoV-2-36h.pdf › Data Sheet 1/SARS-CoV-2 source code & data/SARS-CoV-2 source code/figs4/output/Figure S4D-Calu-3_MOI10-SARS-CoV-2-36h.pdf]

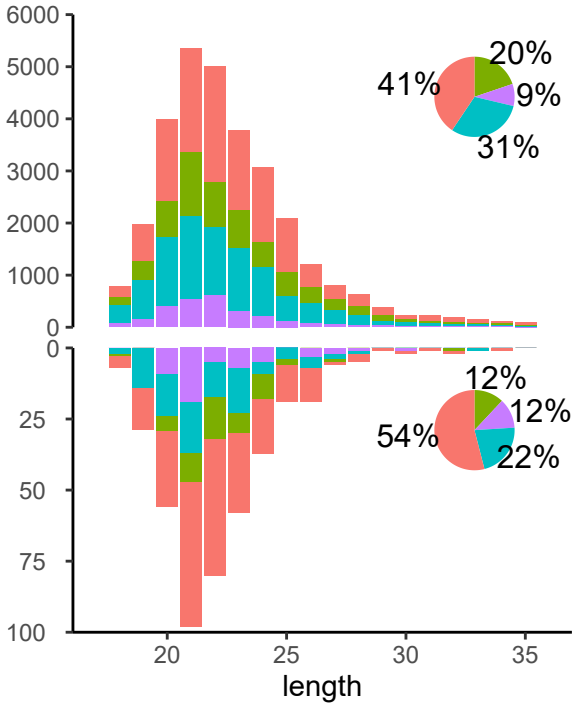

Supplement: Data_Sheet_1.zip [file Figure S4D-Calu-3_MOI10-SARS-CoV-2-48h.pdf › Data Sheet 1/SARS-CoV-2 source code & data/SARS-CoV-2 source code/figs4/output/Figure S4D-Calu-3_MOI10-SARS-CoV-2-48h.pdf]
